# Supplementary material for: CSIRO Environmental Modelling Suite (EMS): scientific description of the optical and biogeochemical models (vB3p0)
Source: Copernicus journal article supplement (doi:10.5194/gmd-13-4503-2020), 2020-09-25

# **S5. Assessment of eReefs biogeochemical simulation against observations**

**Jennifer Skerratt and Mark Baird**

[Supplementary Material for Geoscientific Model Development: CSIRO Environmental Modelling Suite (EMS): Scientific description of the optical and biogeochemical models (vB3p0)]

**Model version: gbr4\_H2p0\_****B3p0****\_Cq2b\_Dcrt**

**Model run period: 1 Dec 2010 to 1 Nov 2018**

- Includes comparison with version **B2p0** where applicable

For more details of Methods see:

Skerratt J.H., M. Mongin, K. A. Wild-Allen, M. E. Baird, B. J. Robson, B. Schaffelke, M. Soja-Wozniak, N Margvelashvili, C. H. Davies, A. J. Richardson, A. D. L. Steven (2019) Simulated nutrient and plankton dynamics in the Great Barrier Reef (2011-2016). J. Mar. Sys. 192, 51-74.

## Document versions

### *Thursday, 3 January 2019 version*

- Includes observation updates to MMP Turbidity and MMP chlorophyll mooring obs to November 2018: p111 to 125
- Includes the new MMP sites which have decreased the metrics for both Turbidity and Fluorescence. The metrics are better if we leave summer of 2011 in.
- Simulated turbidity has zeros (night-time) removed in the model run. p 118 to 125.
- Simulated Fluorescence is not as good as simulated Chl *a* against MMP mooring obs however obs are modified fluorescence based on Chl *a*
- Turbidity is presented at full extent of NTU and again with NTU under 20 (p119 and 125)
- The QC of the new set of MMP data remains excellent but doesn't appear as stringently QC'd as in the past with blanks and some unrealistic data.

### *Friday, 4 January 2019 version*

- Scatter plots of fluorescence against Chl *a* for all MMP moorings and combined scatterplot at end

### *Tuesday, 19 February 2019 version*

- Added parameter file for H3 version

### *Wednesday, 20 February 2019 version*

- Added satellite photos depth of MMP and LTR sites and glossary

### *Tuesday, 26 March 2019 version*

- Added correct NRS nutrient metrics and graphs with extended observational time series and NRS alkalinity extension of observed dates and inclusion of North Stradbroke island (GBRNSI)

## Acknowledgement of data sources:

We thank Britta Schaffelke and her colleagues in the Marine Monitoring Program for their commitment to obtaining the observations that enabled the model evaluation. We also acknowledge the use of data from the AIMS Long Term Monitoring Program, Australia's Integrated Marine Observing System, and The Future Reef 2.0 Program funded by GBRF, Rio Tinto and CSIRO. We greatly appreciate Cedric Robillot for his leadership of the eReefs Project.

# Contents

|     |                                                                                       |     |
|-----|---------------------------------------------------------------------------------------|-----|
| 1.  | Map: River and catchments in eReef model.....                                         | 24  |
| 2.  | Map: AIMS and IMOS NRS sites used in eReef model .....                                | 25  |
| 3.  | Map Wakmatha transect for carbon chemistry.....                                       | 26  |
| 4.  | eReefs biogeochemical model schematic.....                                            | 27  |
| 5.  | Model skill metrics description .....                                                 | 27  |
| 6.  | Abbreviations .....                                                                   | 28  |
| 7.  | Parameter tables for gbr4_H2p0_B3p0_Cb.....                                           | 28  |
| 8.  | Site and model grid depth of the MMP and NRS sites.....                               | 33  |
| 9.  | Site and depths for additional triannual sites or depths .....                        | 33  |
| 10. | Simulated Chl <i>a</i> assessment against AIMS Long Term Monitoring.....              | 34  |
| 11. | Simulated Secchi depth assessment against AIMS Long Term Monitoring.....              | 47  |
| 12. | Simulated DIP assessment against AIMS Long Term Monitoring .....                      | 56  |
| 13. | Simulated NO <sub>x</sub> assessment against AIMS Long Term Monitoring.....           | 69  |
| 14. | Simulated NH <sub>4</sub> assessment against AIMS Long Term Monitoring .....          | 82  |
| 15. | Simulated DON assessment against Long Term Monitoring .....                           | 95  |
| 16. | Simulated DOP assessment against Long Term Monitoring .....                           | 108 |
| 17. | Simulated EFI assessment against Long Term Monitoring TSS.....                        | 121 |
| 18. | Simulated Chl <i>a</i> assessment against IMOS NRS HPLC Chl <i>a</i> .....            | 134 |
| 19. | Simulated Chl <i>a</i> and fluorescence assessment against AIMS MMP fluorescence..... | 137 |
| 20. | Simulated Turbidity assessment against AIMS MMP Turbidity .....                       | 146 |
| 21. | Simulated Chl <i>a</i> assessment against IMOS/NRS fluorescence.....                  | 159 |
| 22. | Simulated NO <sub>x</sub> assessment against NRS: Yongala and NSI.....                | 166 |
| 23. | Simulated NH <sub>4</sub> assessment against NRS: Yongala and NSI.....                | 169 |
| 24. | Simulated DIP assessment against NRS: Yongala and NSI .....                           | 172 |
| 25. | Simulated DIC assessment against NRS Yongala.....                                     | 175 |
| 26. | Simulated alkalinity assessment against NRS Yongala North Stradbroke .....            | 176 |
| 27. | Simulated aragonite assessment against Yongala .....                                  | 179 |
| 28. | Wakmatha transect line for carbon chemistry assessment.....                           | 180 |

## 1. Map: River and catchments in eReef model

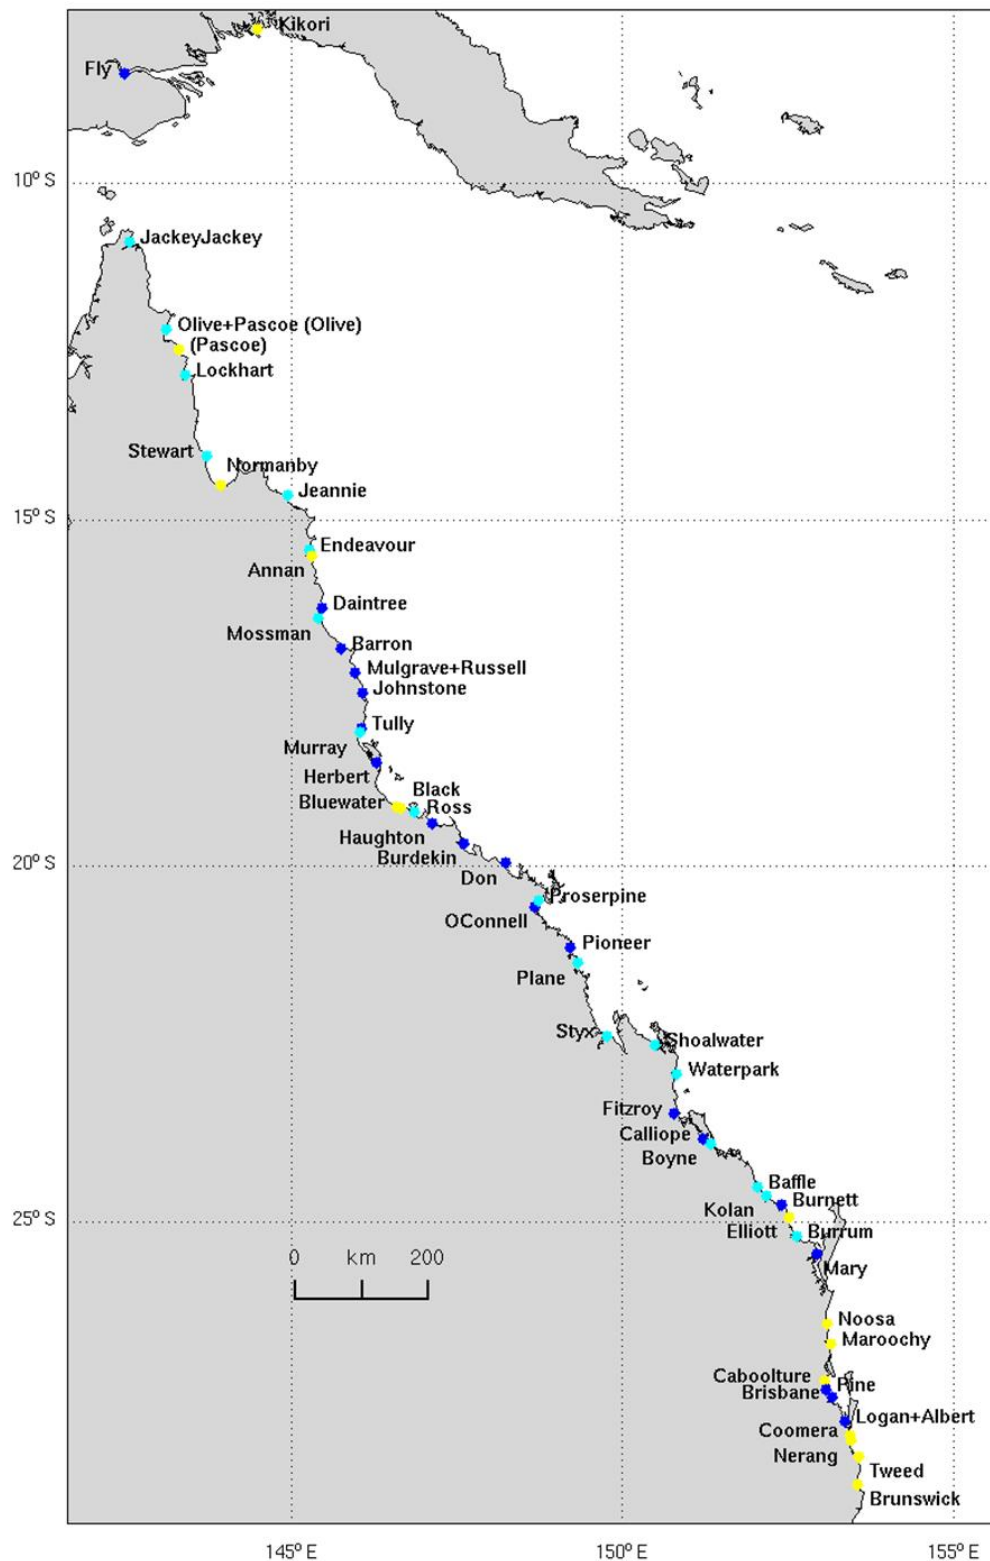

- Rivers and catchment model with hydro flow catchment loads B2p0 and B3p0
- Extra rivers in B3p0 where catchment in as point source loads
- Rivers in hydrodynamic model, some without flow, no catchment model data.

Figure 1 Map of Queensland rivers included in eReef model versions B2p0 and B3p0. Includes extra rivers for B3p0 in light blue



## 2. Map: AIMS and IMOS NRS sites used in eReef model

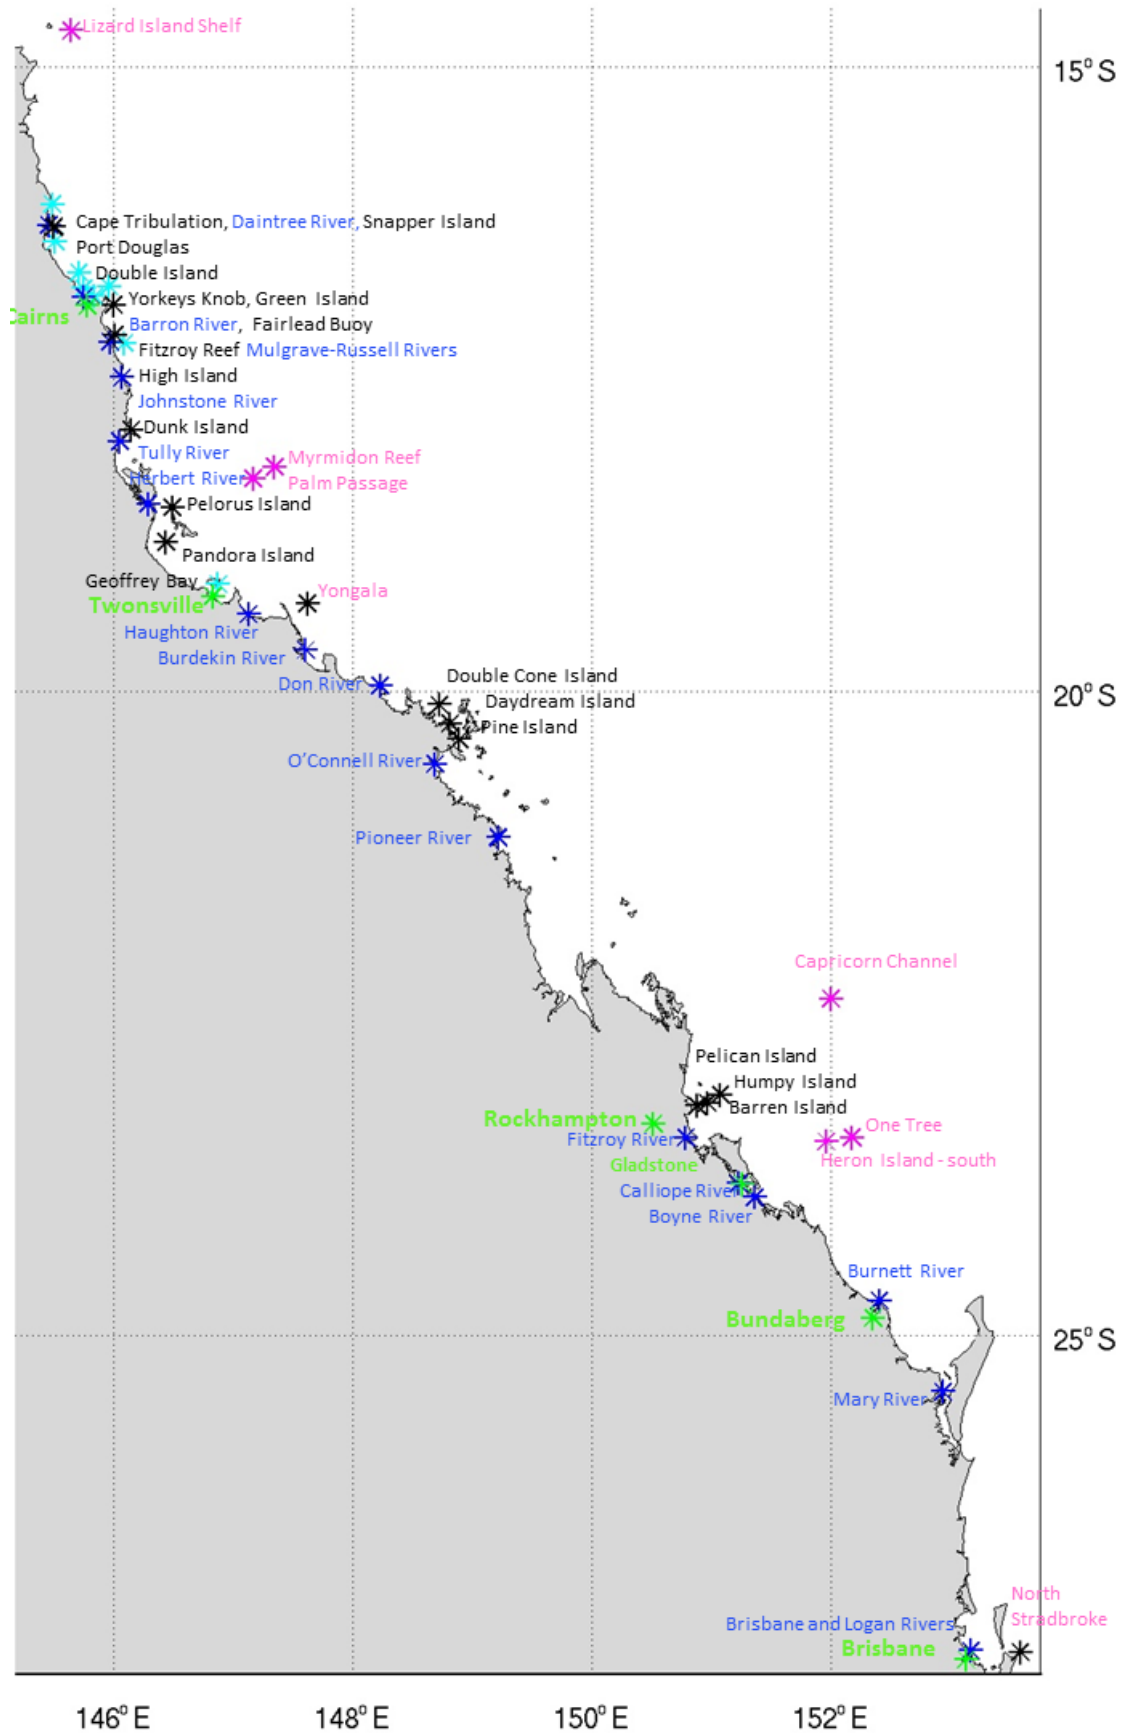

Figure 2 Map of observational sites in this report (black and pink), rivers (blue) and major towns (Green)

### 3. Map Wakmatha transect for carbon chemistry

Figure shows Wakmatha transect and temp and salinity comparison with GBR1 (see page 180 Wakmatha transect line for carbon chemistry assessment of Wakmatha transect line)

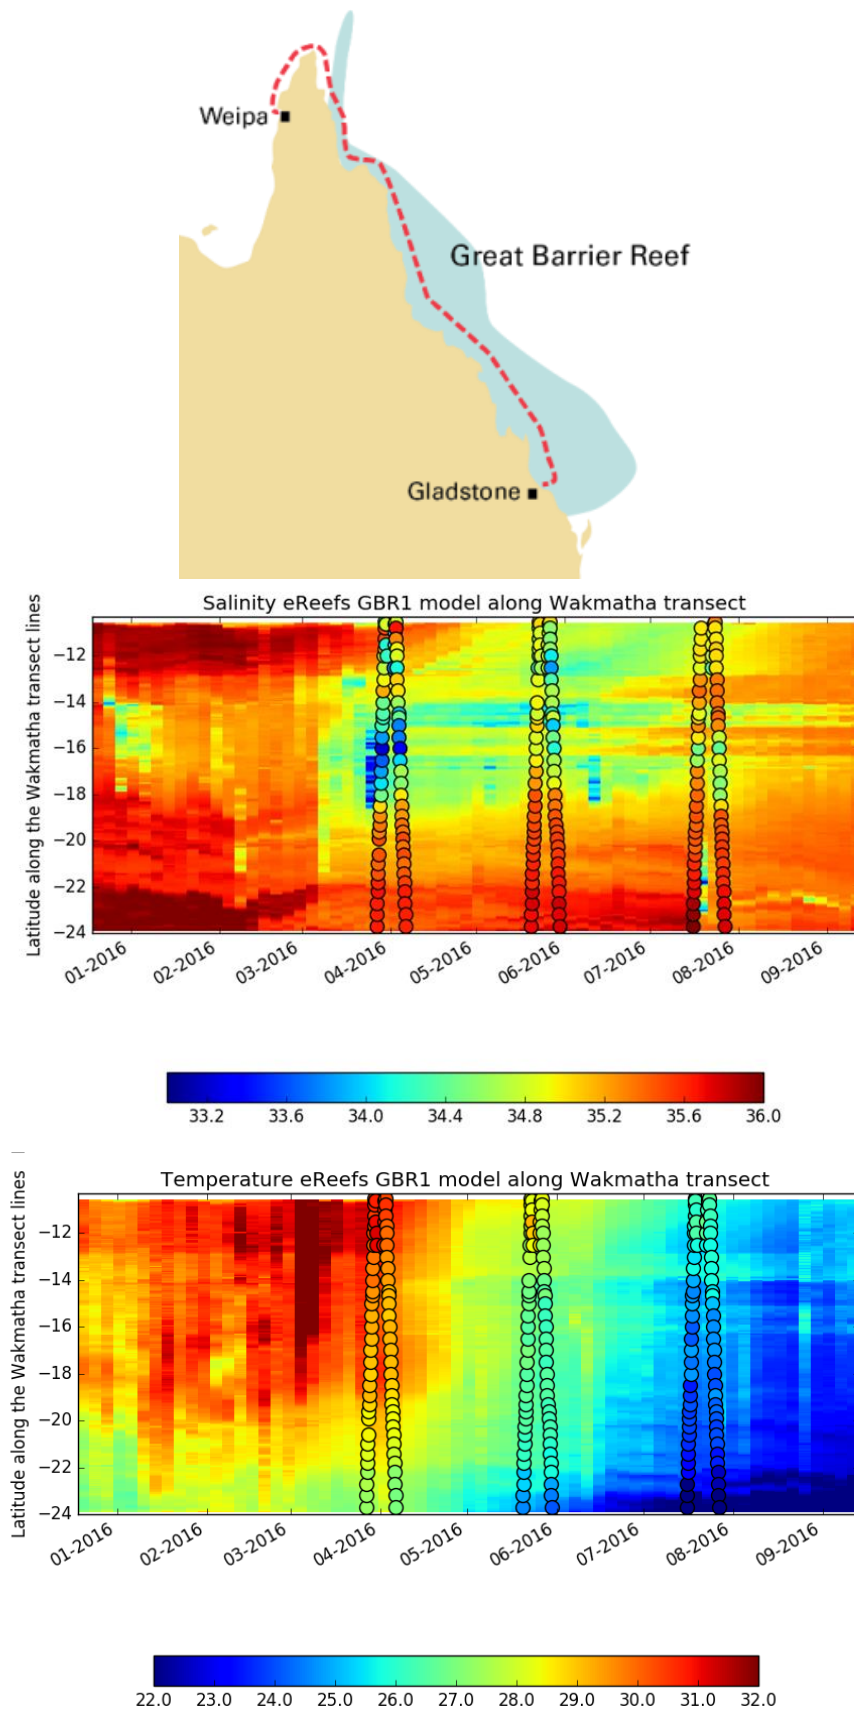

## 4. eReefs biogeochemical model schematic

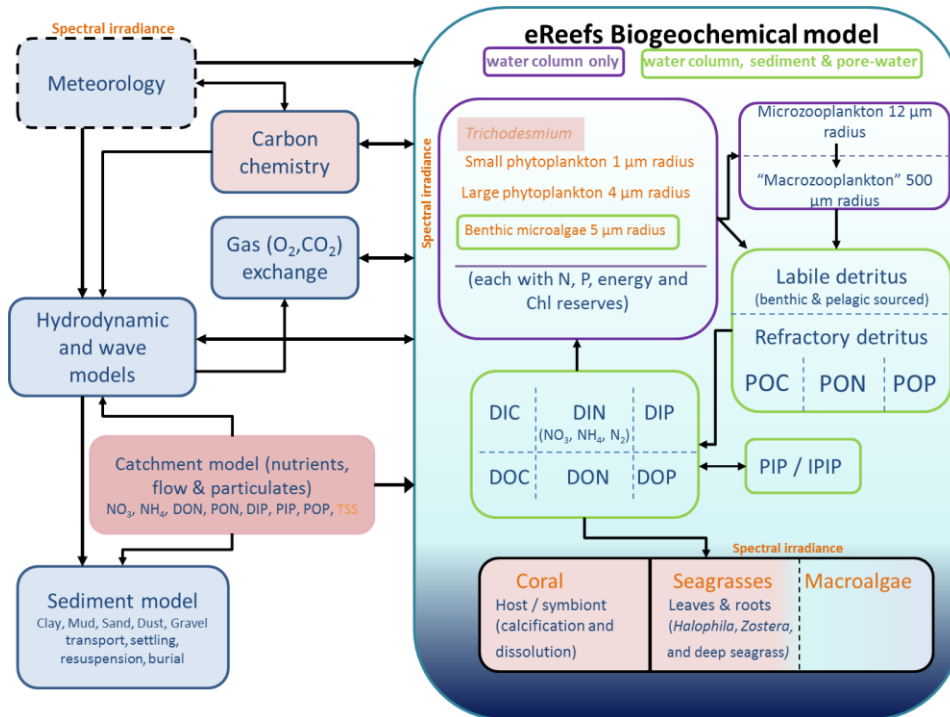

Figure 3. The eReefs modelling system, showing the linkages between hydrodynamic, wave, sediment and the optical and biogeochemical models, as well as the individual linkages within the biogeochemical model. The optically-active components are identified with orange font.

## 5. Model skill metrics description

To evaluate model skill, we consider; bias, the root mean square (RMS) error, the mean absolute error (MAE), and the modified Willmott index or 'd2' (Willmott et al., 1985). The Willmott index uses the sum of absolute values.

Model bias assesses whether the simulated variables are under- or over-predicting observed values. The RMS error is a measure of the absolute magnitude of the "error"/square deviation averaged over the time-series. An RMS or MAE of 0 indicates a perfect fit.

The Willmott index of agreement is designed to quantify errors that are unevenly distributed in time or space and reduce the influence of errors during periods of large observed mean or variance. The Willmott index is the ratio of the mean absolute error and the mean absolute deviation about the observed mean and varies between 0 and 1. A value of 1 indicates a perfect match ( $x = y$ ), and 0 indicates no agreement.

$$\text{Willmott} = 1 - \left[ \frac{\sum |x - y|}{\sum |x - \bar{y}| + (|y - \bar{y}|)} \right]$$

where  $x$  and  $y$  are vectors or arrays of time series data ( $x$  = observed,  $y$  = modelled).

A Willmott index above 0.7 is regularly obtained for high resolution models with high spatial and temporal observations for physical parameters such as salinity and temperature. In most cases for the eReefs model the salinity and temperature index was  $\geq 0.8$  when compared with observations (Appendix 1 of Herzfeld et al., 2016).

## 6. Abbreviations

|                   |                                                                                                                                                                                                               |
|-------------------|---------------------------------------------------------------------------------------------------------------------------------------------------------------------------------------------------------------|
| AIMS              | Australian Institute of Marine Science                                                                                                                                                                        |
| AODN              | Australian Ocean Data Network                                                                                                                                                                                 |
| B2p0              | B2p0: biogeochemical model version 2.0                                                                                                                                                                        |
| B3p0              | B3p0: biogeochemical model version 3.0                                                                                                                                                                        |
| CDOM              | colour dissolved organic matter                                                                                                                                                                               |
| Chl a             | chlorophyll a                                                                                                                                                                                                 |
| CTD               | Conductivity Temperature Depth profiler                                                                                                                                                                       |
| d2                | Statistical metric, aka Willmott index ( see page 27)                                                                                                                                                         |
| DIN               | dissolved inorganic nitrogen                                                                                                                                                                                  |
| DIN               | Dissolved inorganic nitrogen (NH <sub>3</sub> plus NO <sub>x</sub> )                                                                                                                                          |
| DIP               | dissolved inorganic phosphorus                                                                                                                                                                                |
| DOC               | dissolved organic carbon                                                                                                                                                                                      |
| DON               | dissolved organic nitrogen                                                                                                                                                                                    |
| DOP               | dissolved organic phosphorus                                                                                                                                                                                  |
| ENSO              | El Niño-Southern Oscillation                                                                                                                                                                                  |
| GBR               | Great Barrier Reef                                                                                                                                                                                            |
| gbr4_H2p0_B3p0_Cb | gbr4 : model grid with approximate 4 km grid resolution, H2p0: hydrodynamic model version 2.0, B3p0: biogeochemical model version 3.0, Cb: catchment model baseline version using empirical SOURCE Catchments |
| GBRMP             | Great Barrier Reef Marine Park                                                                                                                                                                                |
| GBRMPA            | Great Barrier Reef Marine Park Authority                                                                                                                                                                      |
| GBRWHA            | Great Barrier Reef World Heritage Area                                                                                                                                                                        |
| IMOS              | Integrated Marine and Observing System                                                                                                                                                                        |
| Kd(PAR)           | light attenuation coefficient                                                                                                                                                                                 |
| LTM               | AIMS long term monitoring site                                                                                                                                                                                |
| mae               | mean absolute error                                                                                                                                                                                           |
| mape              | mean absolute percentage error                                                                                                                                                                                |
| MMP               | AIMS Marine Monitoring Program                                                                                                                                                                                |
| MODIS             | Moderate Resolution Imaging Spectroradiometer                                                                                                                                                                 |
| NH <sub>3</sub>   | ammonia                                                                                                                                                                                                       |
| NO <sub>x</sub>   | nitrate plus nitrite                                                                                                                                                                                          |
| NRS               | IMOS National reference station within the model grid these are Yongala (GBRYON) and North Stradbroke Island (GBRNSI)                                                                                         |
| NSI               | North Stradbroke Island                                                                                                                                                                                       |
| NTU               | Nephelometric Turbidity Unit                                                                                                                                                                                  |
| PON               | particulate organic nitrogen                                                                                                                                                                                  |
| POP               | particulate organic phosphorus                                                                                                                                                                                |
| QA/QC             | quality assurance/quality control                                                                                                                                                                             |
| rms               | root mean square                                                                                                                                                                                              |
| secchi            | measurement of water transparency (depth in m)                                                                                                                                                                |
| TSS               | total suspended solids                                                                                                                                                                                        |
| Willmott          | statistical metric (see page 27)                                                                                                                                                                              |

## 7. Parameter tables for gbr4\_H2p0\_B3p0\_Cb

The following 4 pages give the parameters used in the model gbr4\_H2p0\_B3p0\_Cb.

| Parameter description                                                      | Symbol        | Units                                         | Value    | Reference                                                                                                                                                                |
|----------------------------------------------------------------------------|---------------|-----------------------------------------------|----------|--------------------------------------------------------------------------------------------------------------------------------------------------------------------------|
| <b>Phytoplankton</b>                                                       |               |                                               |          |                                                                                                                                                                          |
| Chl-specific scattering coefficient. for microalgae                        | bphy          | $\text{m}^{-1} (\text{mg Chl a m}^{-3})^{-1}$ | 0.2      | Typical microalgae value, Kirk (1994)                                                                                                                                    |
| Natural (linear) mortality rate, large phytoplankton                       | PhyL_mL       | $\text{d}^{-1}$                               | 0.1      | Not attributed                                                                                                                                                           |
| Natural (linear) mortality rate in sediment, large phytoplankton           | PhyL_mL_sed   | $\text{d}^{-1}$                               | 10       | Not attributed                                                                                                                                                           |
| Natural (linear) mortality rate, small phytoplankton                       | PhyS_mL       | $\text{d}^{-1}$                               | 0.1      | Not attributed                                                                                                                                                           |
| Natural (linear) mortality rate in sediment, small phytoplankton           | PhyS_mL_sed   | $\text{d}^{-1}$                               | 1        | Not attributed                                                                                                                                                           |
| Respiration as a fraction of $u_{\text{max}}$                              | Plank_resp    | none                                          | 0.025    | Not attributed                                                                                                                                                           |
| Radius of the large phytoplankton cells                                    | PLrad         | m                                             | 0.000004 | Not attributed                                                                                                                                                           |
| Maximum growth rate of PL at Tref                                          | PLumax        | $\text{d}^{-1}$                               | 1.4      | CSIRO Parameter Library                                                                                                                                                  |
| Ratio of xanthophyll to chl a of PL                                        | PLxan2chl     | $\text{mg mg}^{-1}$                           | 0.81     | CSIRO Parameter Library                                                                                                                                                  |
| Radius of the small phytoplankton cells                                    | PSrad         | m                                             | 0.000001 | Not attributed                                                                                                                                                           |
| Maximum growth rate of PS at Tref                                          | PSumax        | $\text{d}^{-1}$                               | 1.6      | CSIRO Parameter Library                                                                                                                                                  |
| Ratio of xanthophyll to chl a of PS                                        | PSxan2chl     | $\text{mg mg}^{-1}$                           | 0.51     | CSIRO Parameter Library                                                                                                                                                  |
| <b>Trichodesmium</b>                                                       |               |                                               |          |                                                                                                                                                                          |
| DIN conc below which <i>Trichodesmium</i> N fixes                          | DINcrit       | $\text{mg N m}^{-3}$                          | 10       | Lower end of Robson et al., (2013) 4-20 $\text{mg N m}^{-3}$                                                                                                             |
| Maximum density of <i>Trichodesmium</i>                                    | p_max         | $\text{kg m}^{-3}$                            | 1050     | Not attributed                                                                                                                                                           |
| Minimum density of <i>Trichodesmium</i>                                    | p_min         | $\text{kg m}^{-3}$                            | 900      | Not attributed                                                                                                                                                           |
| Radius of <i>Trichodesmium</i> colonies                                    | Tricho_colrad | m                                             | 0.000005 | Not attributed                                                                                                                                                           |
| Critical <i>Trichodesmium</i> above which quadratic mortality applies      | Tricho_crit   | $\text{mg N m}^{-3}$                          | 0.0002   | Not used in code                                                                                                                                                         |
| Linear mortality for <i>Trichodesmium</i> in sediment                      | Tricho_mL     | $\text{d}^{-1}$                               | 0.1      | Not attributed                                                                                                                                                           |
| Quadratic mortality for <i>Trichodesmium</i> due to phages in water column | Tricho_mQ     | $\text{d}^{-1} (\text{mg N m}^{-3})^{-1}$     | 0.1      | At steady-state, indep. of temp, $\text{Tricho\_N} \sim \text{Tricho\_umax} / \text{Tricho\_mQ} = 0.27 / 0.405 = 0.7 \text{ mg N m}^{-3} \sim 0.1 \text{ mg Chl m}^{-3}$ |
| <i>Trichodesmium</i> grazing preference                                    | Tricho_pref   | none                                          | 0        | Not attributed                                                                                                                                                           |
| Radius of <i>Trichodesmium</i> colonies                                    | Tricho_rad    | m                                             | 0.000005 | Not attributed                                                                                                                                                           |
| Sherwood number for the <i>Trichodesmium</i> dimensionless                 | Tricho_Sh     | none                                          | 1        | Not attributed                                                                                                                                                           |
| Maximum growth rate of <i>Trichodesmium</i> at Tref                        | Tricho_umax   | $\text{d}^{-1}$                               | 0.2      | Robson et al., 2013 + Parameter library                                                                                                                                  |
| Ratio of xanthophyll to chl a of <i>Trichodesmium</i>                      | Trichoxan2chl | $\text{mg mg}^{-1}$                           | 0.5      | Subramaniam et al. 1999. LO 44:618-627                                                                                                                                   |
| <b>Microphytobenthos</b>                                                   |               |                                               |          |                                                                                                                                                                          |
| Respiration as a fraction of $u_{\text{max}}$                              | Benth_resp    | none                                          | 0.025    | Not attributed                                                                                                                                                           |
| Radius of the MPB cells                                                    | MBrad         | m                                             | 0.00001  | Not attributed                                                                                                                                                           |
| Maximum growth rate of MB at Tref                                          | MBumax        | $\text{d}^{-1}$                               | 0.839    | CSIRO Parameter Library                                                                                                                                                  |
| Ratio of xanthophyll to chl a of MPB                                       | MBxan2chl     | $\text{mg mg}^{-1}$                           | 0.81     | Not attributed                                                                                                                                                           |
| Natural (quadratic) mortality rate, microphytobenthos, applied in sediment | MPB_mQ        | $\text{d}^{-1} (\text{mg N m}^{-3})^{-1}$     | 0.0001   | SS argument                                                                                                                                                              |

## Zooplankton

|                                                                     |           |                                           |          |                                                                                                                |
|---------------------------------------------------------------------|-----------|-------------------------------------------|----------|----------------------------------------------------------------------------------------------------------------|
| Growth efficiency, large zooplankton                                | ZL_E      | none                                      | 0.426    | CSIRO Parameter Library, [0.341 (0.017900) Baird and Suthers, 2007 from Hansen et al (1997) LO 42: 687-704]    |
| Fraction of growth inefficiency lost to detritus, large zooplankton | ZL_FDG    | none                                      | 0.5      | Not attributed                                                                                                 |
| Fraction of mortality lost to detritus, large zooplankton           | ZL_FDM    | none                                      | 1        | Not attributed                                                                                                 |
| Natural (quadratic) mortality rate, large zooplankton               | ZL_mQ     | $\text{d}^{-1} (\text{mg N m}^{-3})^{-1}$ | 0.012    | Not attributed                                                                                                 |
| Diel vertical migration rate of ZL                                  | ZLdvmrate | $\text{m d}^{-1}$                         | 0        | Not attributed                                                                                                 |
| Grazing technique of large zooplankton                              | ZLmeth    | none                                      | rect     | Not attributed                                                                                                 |
| Light at which the                                                  | ZLpar     | $\text{mol photons m}^{-2} \text{s}^{-1}$ | 1.00E-12 | Not attributed                                                                                                 |
| Radius of the large zooplankton cells                               | ZLrad     | m                                         | 0.00032  | Not attributed                                                                                                 |
| Swimming velocity for large zooplankton                             | ZLswim    | $\text{m s}^{-1}$                         | 0.003    | Not attributed                                                                                                 |
| Maximum growth rate of ZL at Tref                                   | ZLumax    | $\text{d}^{-1}$                           | 1.33     | Not attributed                                                                                                 |
| Growth efficiency, small zooplankton                                | ZS_E      | none                                      | 0.462    | CSIRO Parameter Library [0.3080000 (0.026600) Baird and Suthers, 2007 from Hansen et al (1997) LO 42: 687-704] |
| Fraction of growth inefficiency lost to detritus, small zooplankton | ZS_FDG    | none                                      | 0.5      | Not attributed                                                                                                 |
| Fraction of mortality lost to detritus, small zooplankton           | ZS_FDM    | none                                      | 1        | Not attributed                                                                                                 |
| Natural (quadratic) mortality rate, small zooplankton               | ZS_mQ     | $\text{d}^{-1} (\text{mg N m}^{-3})^{-1}$ | 0.02     | Not attributed                                                                                                 |
| Grazing technique of small zooplankton                              | ZSmeth    | none                                      | rect     | Not attributed                                                                                                 |
| Radius of the small zooplankton cells                               | ZSrad     | m                                         | 0.000005 | Not attributed                                                                                                 |
| Swimming velocity for small zooplankton                             | ZSswim    | $\text{m s}^{-1}$                         | 0.0002   | Not attributed                                                                                                 |
| Maximum growth rate of ZS at Tref                                   | ZSumax    | $\text{d}^{-1}$                           | 4        | Not attributed                                                                                                 |

## Coral

|                                                |               |                                          |          |                                                                                                                                              |
|------------------------------------------------|---------------|------------------------------------------|----------|----------------------------------------------------------------------------------------------------------------------------------------------|
| Quadratic mortality rate of coral polyp        | CHmort        | $(\text{g N m}^{-3})^{-1} \text{d}^{-1}$ | 0.01     | Not attributed                                                                                                                               |
| Nitrogen-specific area of coral polyp density  | CHpolypden    | $\text{m}^2 \text{g N}^{-1}$             | 2        | Not attributed                                                                                                                               |
| Fraction of Host death translocated.           | CHremin       | -                                        | 0.5      | Not attributed                                                                                                                               |
| Max. growth rate of Coral at Tref              | CHumax        | $\text{d}^{-1}$                          | 0.05     | Not attributed                                                                                                                               |
| Linear mortality rate of Zooxanthellae         | CSmort        | $\text{d}^{-1}$                          | 0.04     | Not attributed                                                                                                                               |
| Radius of the Zooxanthellae                    | CSrad         | m                                        | 0.000005 | Not attributed                                                                                                                               |
| Fraction of Zooxanthellae growth to Host.      | CStoCHfrac    | -                                        | 0.9      | Gustafsson et al. (2013) Ecol. Mod. 250: 183-194                                                                                             |
| Max. growth rate of Zooxanthellae at Tref      | CSumax        | $\text{d}^{-1}$                          | 0.4      | Not attributed                                                                                                                               |
| Maximum daytime net coral calcification        | k_day_coral   | $\text{mmol C m}^{-2} \text{s}^{-1}$     | 0.0132   | Anthony et al. (2013), Biogeosciences 10:4897-4909, Fig 5A: 50, 50, 35 55 $\text{mmol m}^{-2} \text{h}^{-1}$ for <i>Acropora aspera</i> n=4  |
| Grid scale to reef scale ratio                 | CHarea        | $\text{m m}^{-1}$                        | 0.1      | Not attributed                                                                                                                               |
| Maximum night time net coral calcification     | k_night_coral | $\text{mmol C m}^{-2} \text{s}^{-1}$     | 0.0069   | Anthony et al. (2013), Biogeosciences 10:4897-4909, Fig 5A: 20, 30, 20, 30 $\text{mmol m}^{-2} \text{h}^{-1}$ for <i>Acropora aspera</i> n=4 |
| Rate coefficient for plankton uptake by corals | Splank        | $\text{m d}^{-1}$                        | 3        | Ribes (2003), PARAMETER library analysis; Ribes and Atkinson (2007) Coral Reefs 26: 413-421                                                  |

| Parameter description | Symbol | Units | Value | Reference |
|-----------------------|--------|-------|-------|-----------|
|-----------------------|--------|-------|-------|-----------|

### Seagrass and Macroalgae

|                                       |       |                      |     |                                                         |
|---------------------------------------|-------|----------------------|-----|---------------------------------------------------------|
| Half-saturation of SG N uptake in SED | SG_KN | $\text{mg N m}^{-3}$ | 420 | Lee and Dunton (1999) 1204-1215. Table 3 <i>Zostera</i> |
|---------------------------------------|-------|----------------------|-----|---------------------------------------------------------|

| Parameter description                             | Symbol           | Units                            | Value  | Reference                                                                                  |
|---------------------------------------------------|------------------|----------------------------------|--------|--------------------------------------------------------------------------------------------|
| Half-saturation of SG P uptake in SED             | SG_KP            | mg P m <sup>-3</sup>             | 96     | Gras et al. (2003) Aquatic Botany 76:299-315. Thalassia testudinum.                        |
| Natural (linear) mortality rate, seagrass         | SG_mL            | d <sup>-1</sup>                  | 0.03   | Fourquean et al. (2003) Chem. Ecol. 19: 373-390. Thalassia leaves with one component decay |
| Critical shear stress for SG loss                 | SG_tau_critical  | N m <sup>-2</sup>                | 1      | NESP project                                                                               |
| Time-scale for critical shear stress for SG loss  | SG_tau_efold     | s                                | 43200  | NESP project                                                                               |
| Half-saturation of SGD N uptake in SED            | SGD_KN           | mg N m <sup>-3</sup>             | 420    | Not attributed                                                                             |
| Half-saturation of SGD P uptake in SED            | SGD_KP           | mg P m <sup>-3</sup>             | 96     | Not attributed                                                                             |
| Natural (linear) mortality rate, aboveground SGD  | SGD_mL           | d <sup>-1</sup>                  | 0.06   | NESP project                                                                               |
| Critical shear stress for SGD loss                | SGD_tau_critical | N m <sup>-2</sup>                | 1      | NESP project                                                                               |
| Time-scale for critical shear stress for SGD loss | SGD_tau_efold    | s                                | 43200  | NESP project                                                                               |
| Fraction (target) of SGD biomass below-ground     | SGDfrac          | -                                | 0.25   | Duarte (1999) Aquatic Biol. 65: 159-174, Halophila ovalis.                                 |
| Nitrogen-specific leaf area of SGD                | SGDleafden       | m <sup>2</sup> g N <sup>-1</sup> | 1.9    | Halophila ovalis: leaf dimensions from Vermaat et al. (1995)                               |
| Compensation irradiance for Halophila             | SGDmlr           | mol m <sup>-2</sup>              | 1.5    | NESP project                                                                               |
| Sine of nadir Deep Seagrass canopy bending angle  | SGDorient        | -                                | 1      | No source                                                                                  |
| Natural (linear) mortality rate, belowground SGD  | SGDROOT_mL       | d <sup>-1</sup>                  | 0.004  | NESP project                                                                               |
| Maximum depth for Halophila roots                 | SGDrootdepth     | m                                | -0.05  | NESP project                                                                               |
| Halophila seed biomass as fraction of 63 % cover  | SGDseedfrac      | -                                | 0.01   | Not attributed                                                                             |
| Time scale for seagrass translocation             | SGDtransrate     | d <sup>-1</sup>                  | 0.0333 | Loosely based on Zostera marine Kaldy et al., 2013 MEPS 487:27-39                          |
| Maximum growth rate of SGD at Tref                | SGDumax          | d <sup>-1</sup>                  | 0.4    | x2 nighttime, x2 for roots.                                                                |
| Fraction (target) of SG biomass below-ground      | SGfrac           | -                                | 0.75   | Babcock (2015) Zostera capricornii                                                         |
| Half-saturation of SGH N uptake in SED            | SGH_KN           | mg N m <sup>-3</sup>             | 420    | Not attributed                                                                             |
| Half-saturation of SGH P uptake in SED            | SGH_KP           | mg P m <sup>-3</sup>             | 96     | Not attributed                                                                             |
| Natural (linear) mortality rate, seagrassH        | SGH_mL           | d <sup>-1</sup>                  | 0.06   | Fourquean et al. (2003) Chem. Ecol. 19: 373-390. Thalassia leaves with one component decay |
| Critical shear stress for SGH loss                | SGH_tau_critical | N m <sup>-2</sup>                | 1      | NESP project                                                                               |
| Time-scale for critical shear stress for SGH loss | SGH_tau_efold    | s                                | 43200  | NESP project                                                                               |
| Fraction (target) of SGH biomass below-ground     | SGHfrac          | -                                | 0.5    | Babcock 2015, Halophila ovalis                                                             |
| Nitrogen-specific area of seagrass leaf           | SGHleafden       | m <sup>2</sup> g N <sup>-1</sup> | 1.9    | Halophila ovalis: leaf dimensions from Vermaat et al. (1995)                               |
| Compensation irradiance for SG                    | SGHmlr           | mol m <sup>-2</sup>              | 2      | Not attributed                                                                             |
| Sine of nadir Halophila canopy bending angle      | SGHorient        | -                                | 1      | No source                                                                                  |
| Natural (linear) mortality rate, seagrassH        | SGHROOT_mL       | d <sup>-1</sup>                  | 0.004  | Fourquean et al. (2003) Chem. Ecol. 19: 373-390. Thalassia roots with one component decay  |
| Maximum depth for Halophila roots                 | SGHrootdepth     | m                                | -0.08  | Roberts (1993) Aust. J. Mar. Fresh. Res. 44:85-100.                                        |
| Halophila seed biomass as fraction of 63 % cover  | SGHseedfrac      | -                                | 0.01   | Not attributed                                                                             |
| Time scale for seagrass translocation             | SGHtransrate     | d <sup>-1</sup>                  | 0.0333 | Loosely based on Zostera marine Kaldy et al., 2013 MEPS 487:27-39                          |
| Maximum growth rate of SGH at Tref                | SGHumax          | d <sup>-1</sup>                  | 0.4    | x2 night-time, x2 for roots.                                                               |
| Nitrogen-specific area of seagrass leaf           | SGleafden        | m <sup>2</sup> g N <sup>-1</sup> | 1.5    | Zostera capricornia: leaf dimensions Kemp et al (1987) Mar Ecol. Prog. Ser. 41:79-86.      |
| Compensation irradiance for SG                    | SGmlr            | mol m <sup>-2</sup>              | 4.5    | Not attributed                                                                             |
| SGorient                                          | SGorient         | -                                | 0.5    | Not attributed                                                                             |
| Natural (linear) mortality rate, seagrass         | SGROOT_mL        | d <sup>-1</sup>                  | 0.004  | Fourquean et al. (2003) Chem. Ecol. 19: 373-390. Thalassia roots with one component decay  |
| Maximum depth for Zostera roots                   | SGrootdepth      | m                                | -0.15  | Roberts (1993) Aust. J. Mar. Fresh. Res. 44:85-100.                                        |
| Seagrass seed biomass as fraction of 63 % cover   | SGseedfrac       | -                                | 0.01   | No source                                                                                  |
| Time scale for seagrass translocation             | SGtransrate      | d <sup>-1</sup>                  | 0.0333 | Loosely based on Zostera marine Kaldy et al., 2013 MEPS 487:27-39                          |
| Maximum growth rate of SG at Tref                 | SGumax           | d <sup>-1</sup>                  | 0.4    | x2 nighttime, x2 for roots.                                                                |
| Natural (linear) mortality rate, macroalgae       | MA_mL            | d <sup>-1</sup>                  | 0.01   | Not attributed                                                                             |
| Nitrogen-specific area of macroalgae leaf         | MAleafden        | m <sup>2</sup> g N <sup>-1</sup> | 1      | Not attributed                                                                             |
| Maximum growth rate of MA at Tref                 | MAumax           | d <sup>-1</sup>                  | 1      | Not attributed                                                                             |

| Parameter description | Symbol | Units | Value | Reference |
|-----------------------|--------|-------|-------|-----------|
|-----------------------|--------|-------|-------|-----------|



## Biogeochemistry

|                                                                   |                   |                                        |          |                                                                                                                                                                                              |
|-------------------------------------------------------------------|-------------------|----------------------------------------|----------|----------------------------------------------------------------------------------------------------------------------------------------------------------------------------------------------|
| Reference temperature                                             | Tref              | Deg C                                  | 20       | CSIRO Parameter Library                                                                                                                                                                      |
| Temperature coefficient for rate parameters                       | Q10               | none                                   | 2        | CSIRO Parameter Library                                                                                                                                                                      |
| Nominal rate of TKE dissipation in water column                   | TKEEps            | m <sup>2</sup> s <sup>-3</sup>         | 0.000001 | Not attributed                                                                                                                                                                               |
| Atmospheric CO2                                                   | xco2_in_air_dum   | ppmv                                   | 396.48   | Mean 2013 at Mauna Loa: <a href="http://co2now.org/current-co2/co2-now/">http://co2now.org/current-co2/co2-now/</a>                                                                          |
| Wavelengths of light                                              | Light_lambda      | nm                                     | Various* | Approx. 20 nm resolution with 10 nm about 440 nm. PAR (400-700) is integral of bands 2-22 (290 310 330 350 370 390 410 430 440 450 470 490 510 530 550 570 590 610 630 650 670 690 710 800)* |
| Nominal N:Chl a ratio in phytoplankton by weight                  | NtoCHL            | g N (g Chl a) <sup>-1</sup>            | 7        | Represents a C:Chl ratio of 39.25, Baird et al. (2013) Limnol. Oceanogr. 58: 1215-1226.                                                                                                      |
| Concentration of dissolved N2                                     | N2                | mg N m <sup>-3</sup>                   | 2000     | Robson et al. (2013)                                                                                                                                                                         |
| Fraction of labile detritus converted to refractory detritus      | F_LD_RD           | none                                   | 0.19     | Not attributed                                                                                                                                                                               |
| Fraction of labile detritus converted to dissolved organic matter | F_LD_DOM          | none                                   | 0.1      | Not attributed                                                                                                                                                                               |
| fraction of refractory detritus that breaks down to DOM           | F_RD_DOM          | none                                   | 0.05     | Not attributed                                                                                                                                                                               |
| Breakdown rate of labile detritus at 106:16:1                     | r_DetPL           | d <sup>-1</sup>                        | 0.04     | Not attributed                                                                                                                                                                               |
| Breakdown rate of labile detritus at 550:30:1                     | r_DetBL           | d <sup>-1</sup>                        | 0.001    | Not attributed                                                                                                                                                                               |
| Breakdown rate of refractory detritus                             | r_RD              | d <sup>-1</sup>                        | 0.001    | Not attributed                                                                                                                                                                               |
| Breakdown rate of dissolved organic matter                        | r_DOM             | d <sup>-1</sup>                        | 0.0001   | Achieves approx. SS of global ocean at 20 C.                                                                                                                                                 |
| Oxygen half-saturation for aerobic respiration                    | KO_aer            | mg O m <sup>-3</sup>                   | 256      | Not attributed                                                                                                                                                                               |
| Maximal nitrification rate in water column                        | r_nit_wc          | d <sup>-1</sup>                        | 0.1      | Not attributed                                                                                                                                                                               |
| Maximal nitrification rate in water sediment                      | r_nit_sed         | d <sup>-1</sup>                        | 20       | Not attributed                                                                                                                                                                               |
| Oxygen half-saturation for nitrification                          | KO_nit            | mg O m <sup>-3</sup>                   | 500      | Not attributed                                                                                                                                                                               |
| Rate at which P reaches adsorbed/desorbed equilibrium             | Pads_r            | d <sup>-1</sup>                        | 0.04     | Not attributed                                                                                                                                                                               |
| Freundlich Isothermic Const P adsorption to TSS in water column   | Pads_Kwc          | mg P kg TSS <sup>-1</sup>              | 30       | Not attributed                                                                                                                                                                               |
| Freundlich Isothermic Const P adsorption to TSS in sediment       | Pads_Ksed         | mg P kg TSS <sup>-1</sup>              | 74       | Not attributed                                                                                                                                                                               |
| Oxygen half-saturation for P adsorption                           | Pads_KO           | mg O m <sup>-3</sup>                   | 2000     | Not attributed                                                                                                                                                                               |
| Exponent for Freundlich Isotherm                                  | Pads_exp          | none                                   | 1        | Not attributed                                                                                                                                                                               |
| Maximum denitrification rate                                      | r_den             | d <sup>-1</sup>                        | 0.8      | Not attributed                                                                                                                                                                               |
| Oxygen half-inhibition of denitrification rate                    | KO_den            | mg O m <sup>-3</sup>                   | 10000    | Not attributed                                                                                                                                                                               |
| Rate of conversion of PIP to immobilised PIP                      | r_immob_PIP       | d <sup>-1</sup>                        | 0.0012   | Not attributed                                                                                                                                                                               |
| Sediment-water diffusion coefficient                              | EpiDiffCoeff      | m <sup>2</sup> s <sup>-1</sup>         | 3.00E-07 | Not attributed                                                                                                                                                                               |
| Thickness of diffusive layer                                      | EpiDiffDz         | m                                      | 0.0065   | Not attributed                                                                                                                                                                               |
| age tracer growth rate per day                                    | ageing_decay      | d <sup>-1</sup>                        | 1        | Not attributed                                                                                                                                                                               |
| age tracer decay rate per day outside source                      | anti_ageing_decay | d <sup>-1</sup>                        | 0.1      | Not attributed                                                                                                                                                                               |
| net dissolution rate of sediment without coral                    | dissCaCO3_sed     | mmol C m <sup>-2</sup> s <sup>-1</sup> | 0.001    | Anthony et al. (2013), Biogeosciences 10:4897-4909, Fig 5E: -1 2 3 6 mmol m <sup>-2</sup> h <sup>-1</sup>                                                                                    |
| DOC-specific absorption of CDOM at 443 nm                         | acdom443star      | m <sup>2</sup> mg C <sup>-1</sup>      | 0.00013  | Not attributed                                                                                                                                                                               |
| Minimum carbon to chlorophyll ratio                               | C2Chlmin          | wt/wt                                  | 20       | Not attributed                                                                                                                                                                               |
| swr scaling factor                                                | SWRscale          | none                                   | 1        | Not attributed                                                                                                                                                                               |
| Bleaching ROS threshold                                           | ROStreshold       | -                                      | 5.00E-04 | Not attributed                                                                                                                                                                               |
| increased breakdown fraction DetrP to DOP                         | r_RD_NtoP         | -                                      | 2        | Not attributed                                                                                                                                                                               |
| increased breakdown fraction DOMP to DIP                          | r_DOM_NtoP        | -                                      | 1.5      | Not attributed                                                                                                                                                                               |



## 8. Site and model grid depth of the MMP and NRS sites

| MMP and NRS Sites             | GBR4 grid depth (m) | Site depth (m) |
|-------------------------------|---------------------|----------------|
| Barren Island                 | 24                  | 15 - 19        |
| Daydream Island               | 17                  | 23 - 25        |
| Double Cone Island            | 17                  | 23 - 31        |
| Dunk Island                   | 9                   | 9 - 10         |
| Fitzroy Island                | 27                  | 15 - 17        |
| Geoffrey Bay                  | 10                  | 9 - 10         |
| High Island                   | 18                  | 22 - 25        |
| Humpy Island                  | 13                  | 12 - 19        |
| North Stradbroke Island (NSI) | 66                  | 65 - 67        |
| Pandora Island                | 17                  | 13 - 14        |
| Pelican Island                | 4                   | 9 - 10         |
| Pelorus Island                | 25                  | 25 - 31        |
| Pine Island                   | 18                  | 20 - 25        |
| Russell Island                | 20                  | 22 - 24        |
| Snapper Island                | 22                  | 8 - 11         |
| Yongala                       | 29                  | 26 - 27        |

## 9. Site and depths for additional triannual sites or depths

| AIMS additional<br>Triannual Water<br>Quality sites | Sampling Depths<br>(m) |    |    |
|-----------------------------------------------------|------------------------|----|----|
| Cape Tribulation                                    | 10                     |    |    |
| Snapper Island                                      | 10                     |    |    |
| Port Douglas                                        | 0                      | 15 |    |
| Double Island                                       | 0                      | 18 |    |
| Green Island                                        | 0                      | 18 | 36 |
| Yorkeys Knob                                        | 0                      | 8  |    |
| Fairlead Buoy                                       | 0                      |    |    |
| Fitzroy Reef                                        | 0                      | 15 |    |
| High Island                                         | 0                      | 10 | 20 |
| Russell Island                                      | 0                      | 10 | 20 |
| Dunk Island                                         | 5                      |    |    |
| Pelorus Island                                      | 0                      | 14 | 28 |
| Double Cone Island                                  | 10                     | 23 |    |
| Daydream Island                                     | 10                     | 23 |    |
| Pine Island                                         | 0                      | 20 |    |
| Barren Island                                       | 10                     |    |    |
| Humpy Island                                        | 0                      | 10 |    |

## 10. Simulated Chl *a* assessment against AIMS Long Term Monitoring

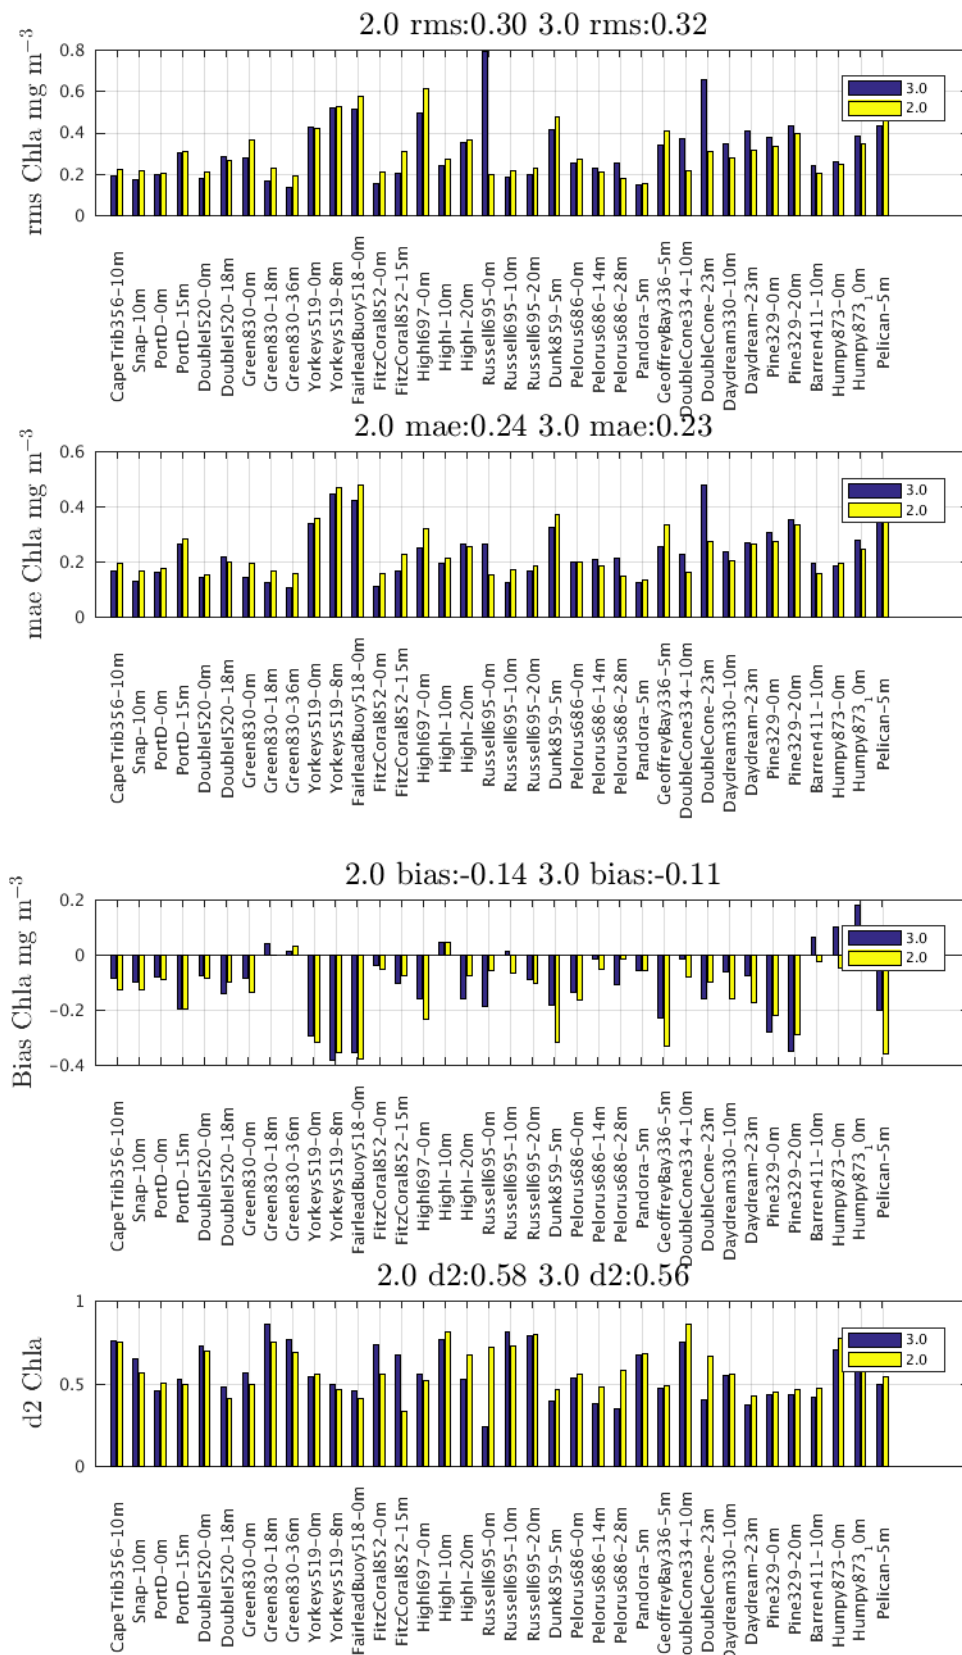

Figure 4 Metrics for Long Term Monitoring sites Chlorophyll assessment against observations for model version 3p0 and 2p0 d2 = Willmott index see Statistical metric page 27.mae:mean absolute error, rms root mean square

Pelican\_5m 3.0 d2:0.49, mape:57.4, rms:0.4306  
 bias:-0.2007, r:0.2329, obsmean:0.6437  
 Pelican\_5m 2.0 d2:0.54, mape:56.6, rms:0.4907  
 bias:-0.3625, r:0.4393, obsmean:0.6437

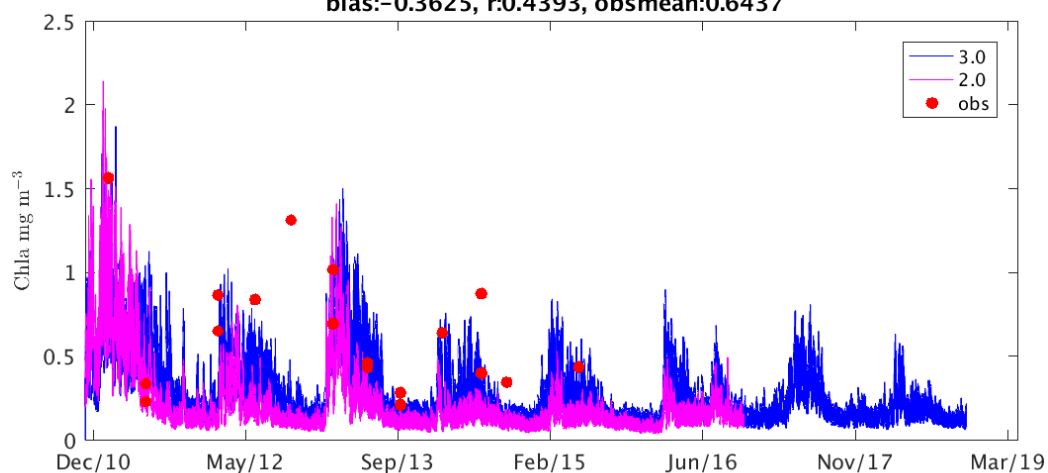

Humpy873\_10m 3.0 d2:0.63, mape:86.7, rms:0.3797  
 bias:0.1801, r:0.5769, obsmean:0.3725  
 Humpy873\_10m 2.0 d2:0.70, mape:55.6, rms:0.3449  
 bias:0.0125, r:0.6545, obsmean:0.3725

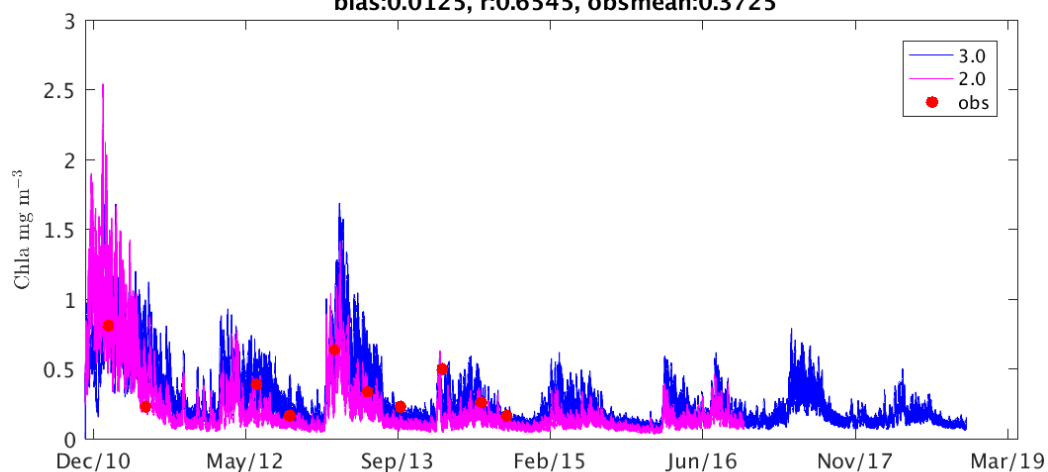

Humpy873\_0m 3.0 d2:0.70, mape:58.6, rms:0.2604  
 bias:0.1022, r:0.6019, obsmean:0.3552  
 Humpy873\_0m 2.0 d2:0.77, mape:49.0, rms:0.2437  
 bias:-0.0469, r:0.7150, obsmean:0.3552

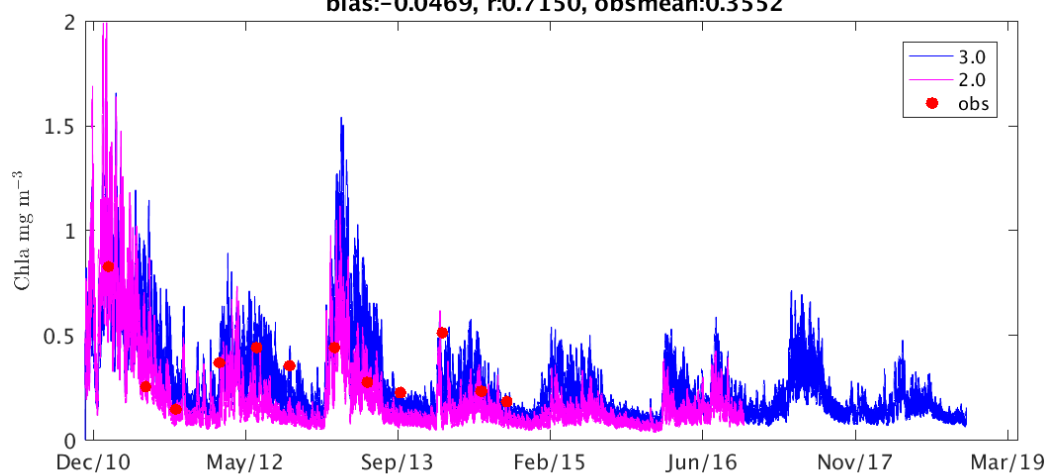

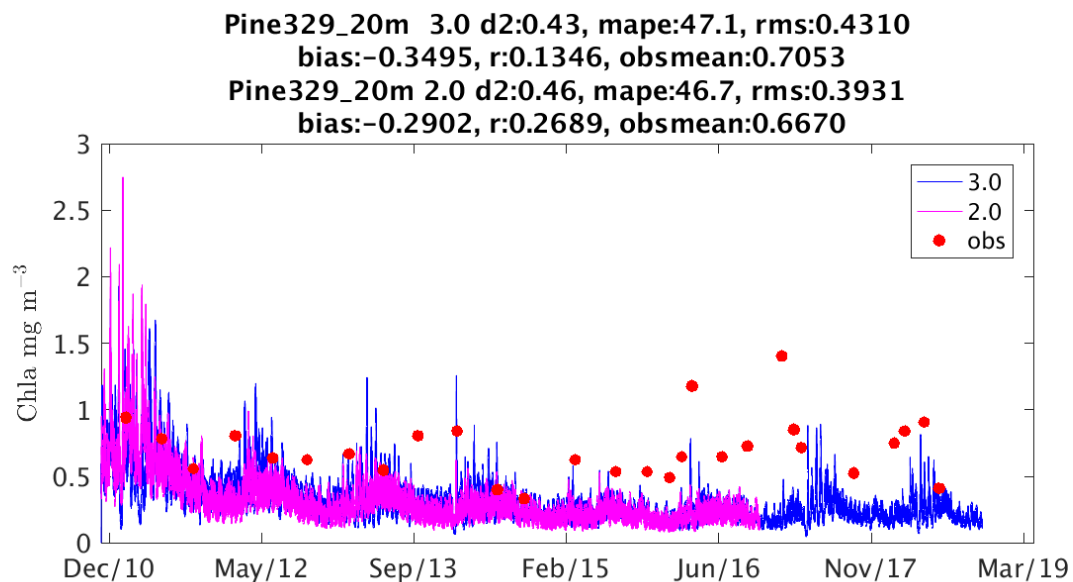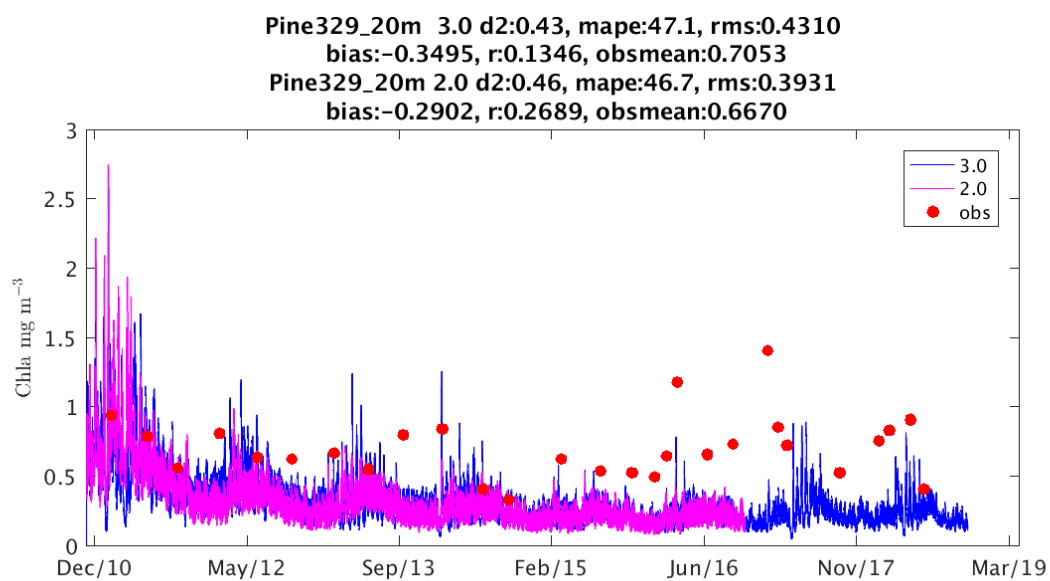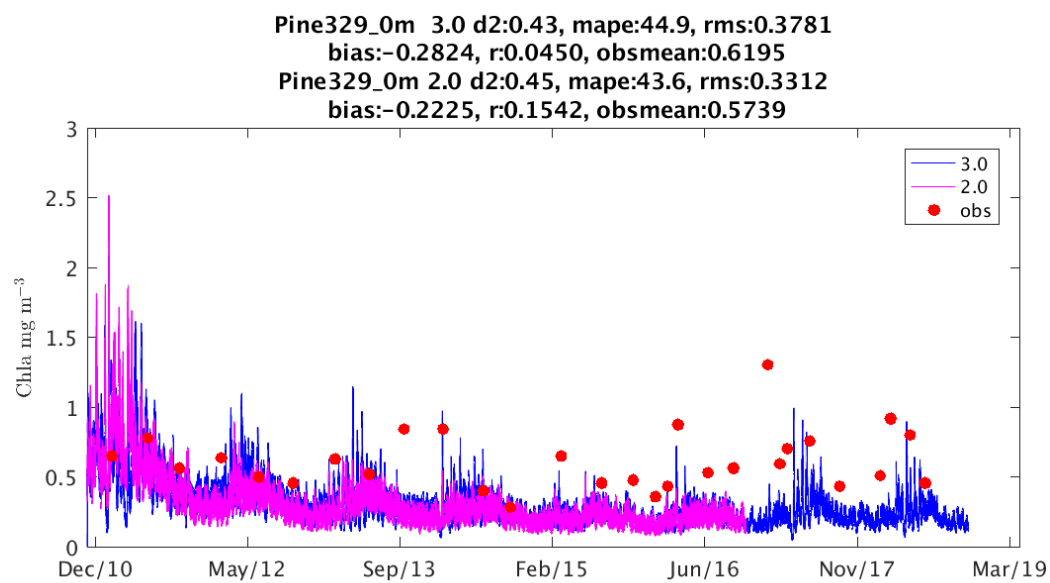

Daydream\_23m 3.0 d2:0.37, mape:40.5, rms:0.4067  
 bias:-0.0757, r:0.2319, obsmean:0.6542  
 Daydream\_23m 2.0 d2:0.42, mape:39.6, rms:0.3114  
 bias:-0.1758, r:0.1886, obsmean:0.6542

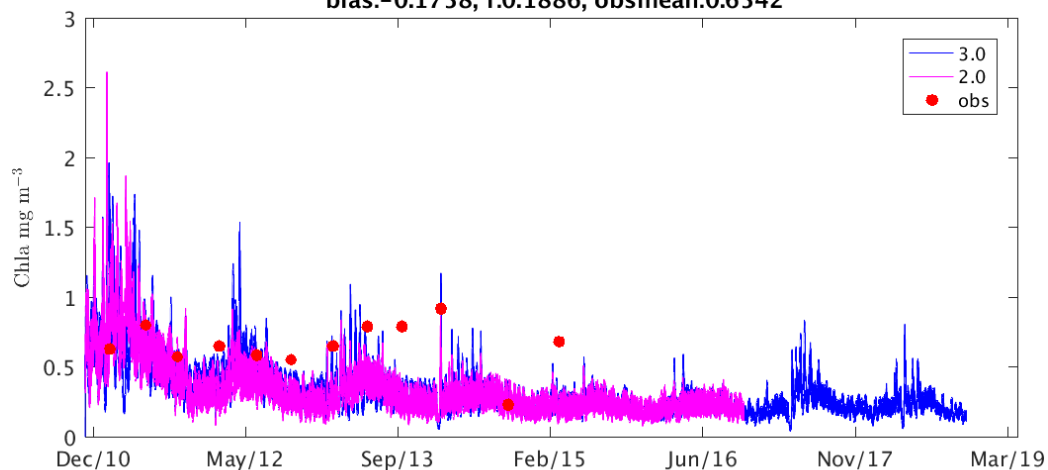

Daydream330\_10m 3.0 d2:0.55, mape:35.5, rms:0.3463  
 bias:-0.0645, r:0.4642, obsmean:0.5693  
 Daydream330\_10m 2.0 d2:0.56, mape:31.6, rms:0.2735  
 bias:-0.1611, r:0.3283, obsmean:0.5693

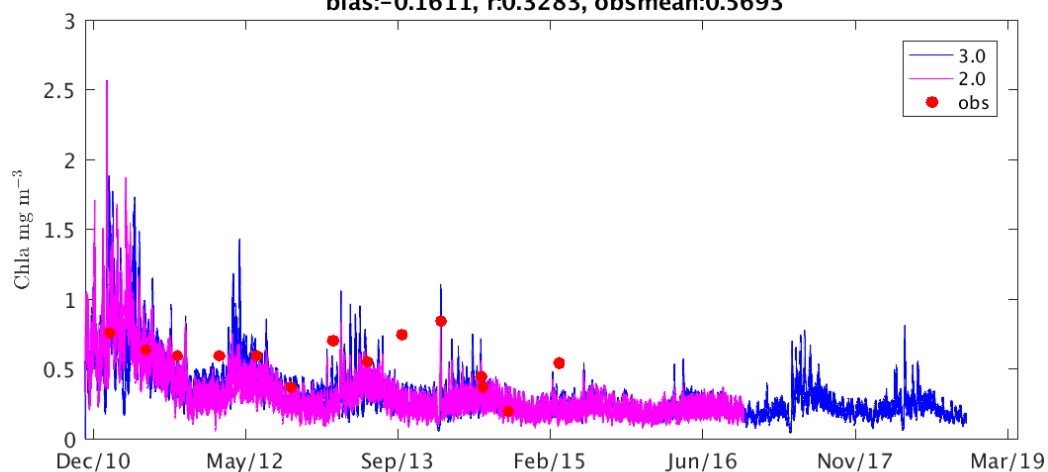

DoubleCone\_23m 3.0 d2:0.40, mape:73.9, rms:0.6570  
 bias:-0.1586, r:0.1348, obsmean:0.6454  
 DoubleCone\_23m 2.0 d2:0.66, mape:58.4, rms:0.3045  
 bias:-0.0987, r:0.4722, obsmean:0.5267

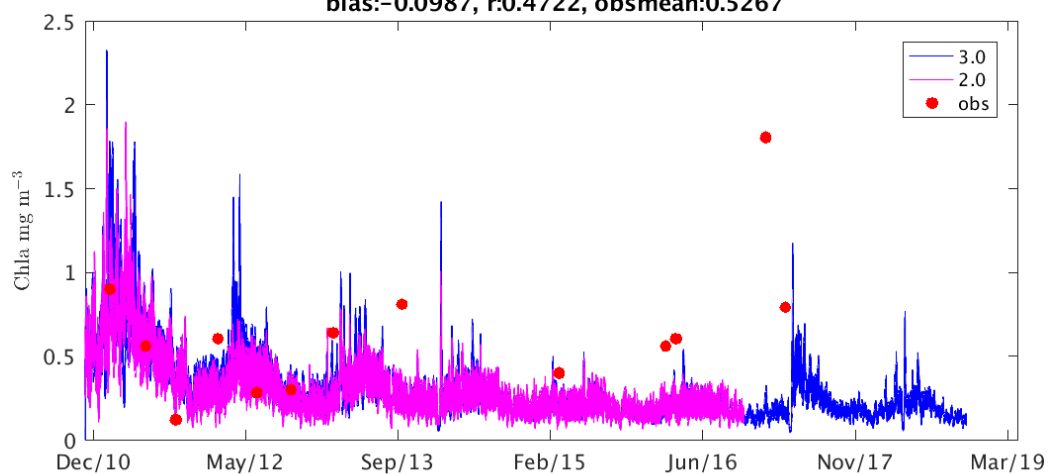

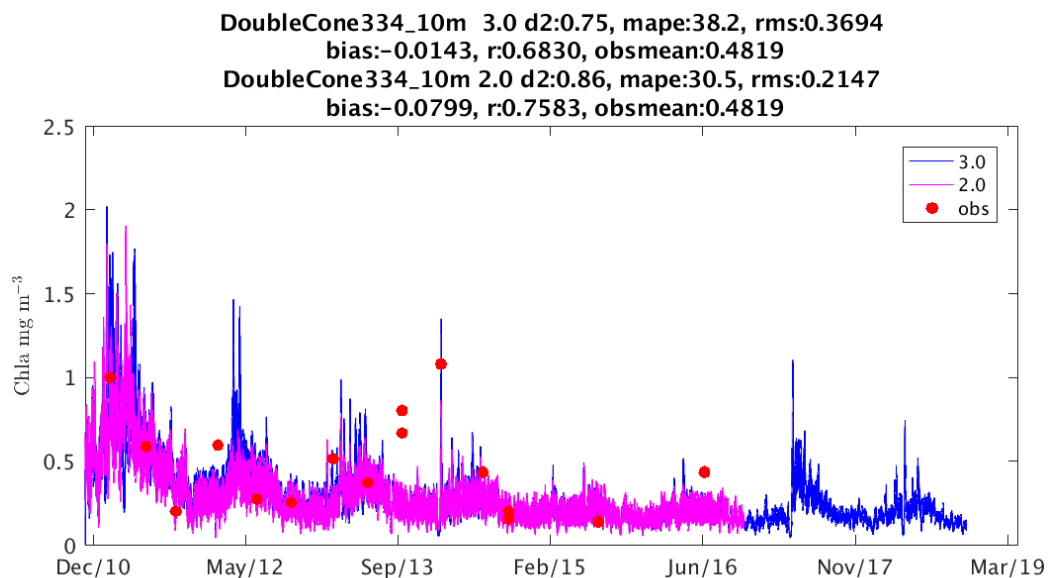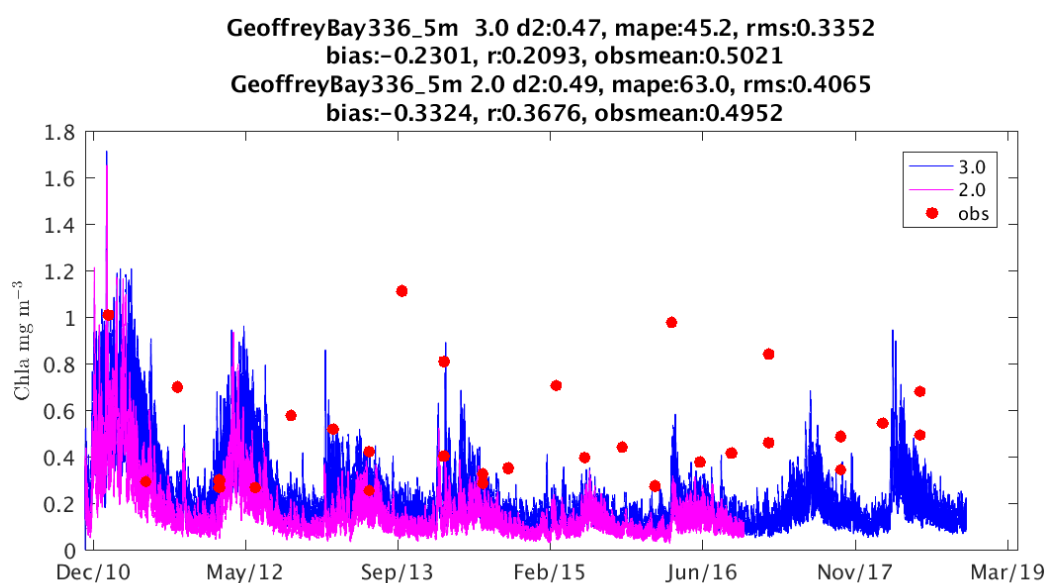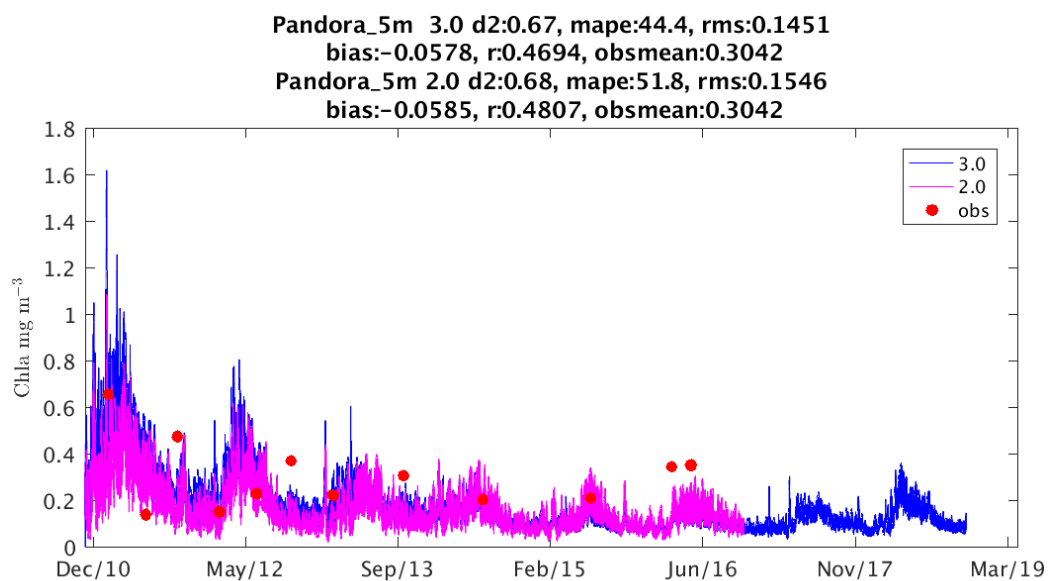

Pelorus686\_28m 3.0 d2:0.34, mape:49.0, rms:0.2530  
 bias:-0.1116, r:-0.1585, obsmean:0.4373  
 Pelorus686\_28m 2.0 d2:0.57, mape:41.1, rms:0.1740  
 bias:-0.0181, r:0.3049, obsmean:0.3663

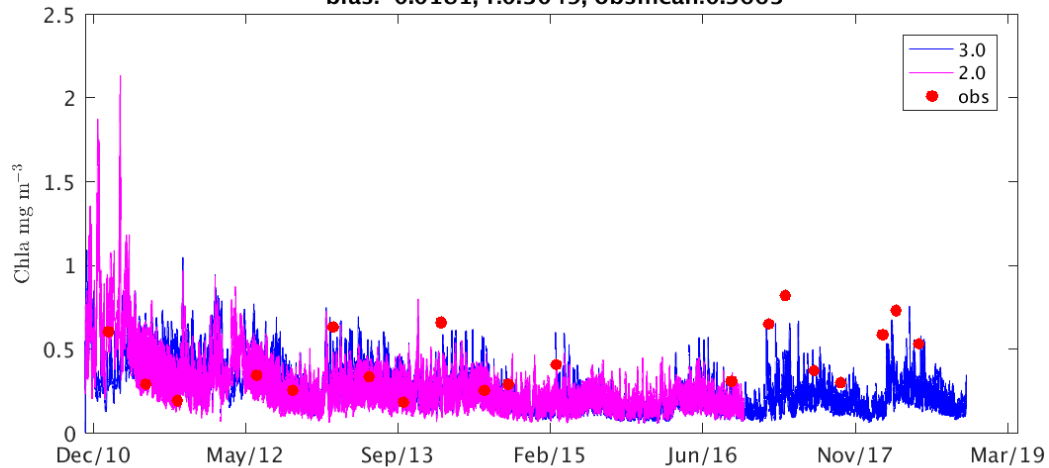

Pelorus686\_0m 3.0 d2:0.53, mape:49.4, rms:0.2533  
 bias:-0.1378, r:0.3643, obsmean:0.3693  
 Pelorus686\_0m 2.0 d2:0.55, mape:43.0, rms:0.2692  
 bias:-0.1664, r:0.5682, obsmean:0.3842

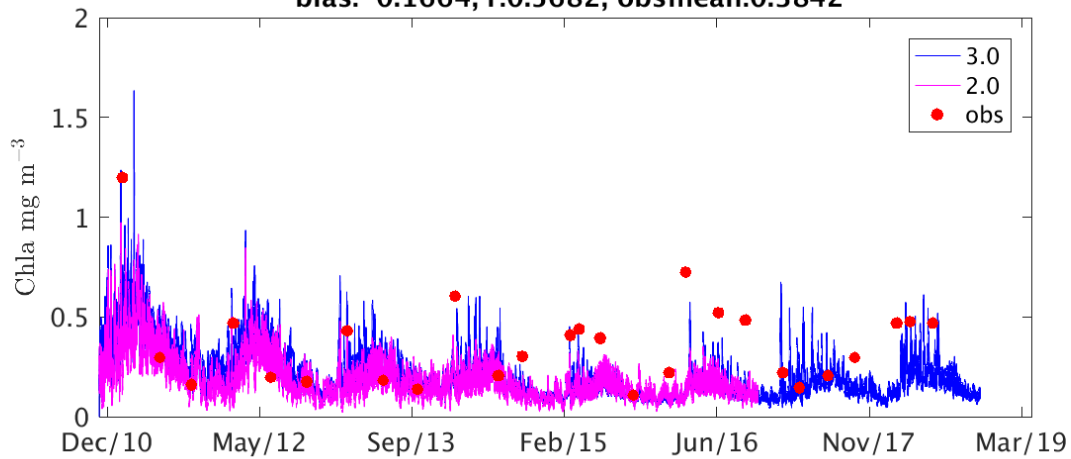

Pelorus686\_0m 3.0 d2:0.53, mape:49.4, rms:0.2533  
 bias:-0.1378, r:0.3643, obsmean:0.3693  
 Pelorus686\_0m 2.0 d2:0.55, mape:43.0, rms:0.2692  
 bias:-0.1664, r:0.5682, obsmean:0.3842

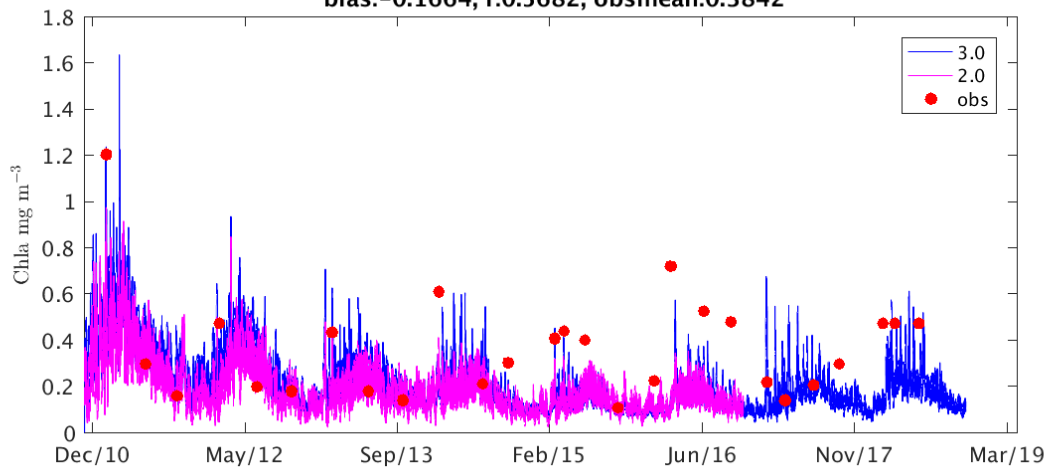

**Dunk859\_5m 3.0 d2:0.39, mape:104.4, rms:0.4133**  
**bias:-0.1841, r:0.0841, obsmean:0.5985**  
**Dunk859\_5m 2.0 d2:0.46, mape:82.8, rms:0.4714**  
**bias:-0.3172, r:0.2437, obsmean:0.5985**

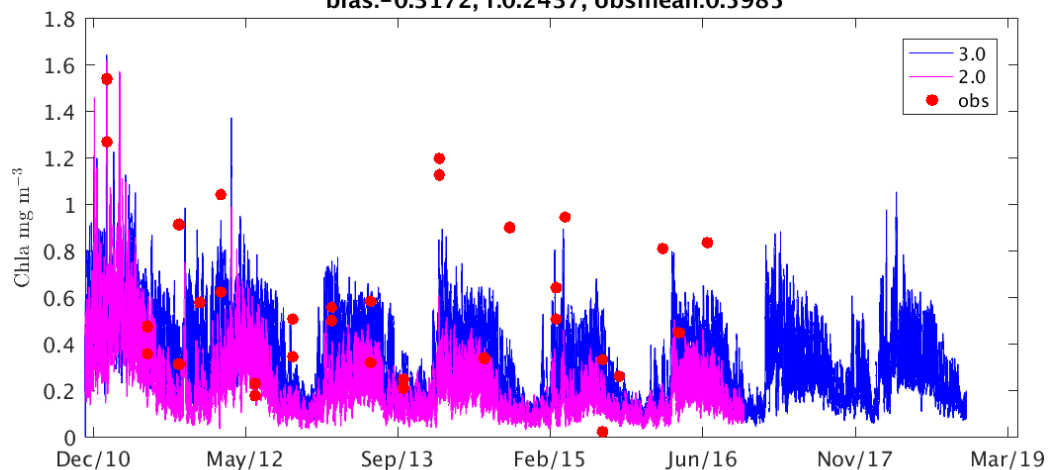

**Russell695\_20m 3.0 d2:0.78, mape:43.3, rms:0.1924**  
**bias:-0.0913, r:0.6808, obsmean:0.4548**  
**Russell695\_20m 2.0 d2:0.79, mape:49.3, rms:0.2258**  
**bias:-0.1055, r:0.6760, obsmean:0.4741**

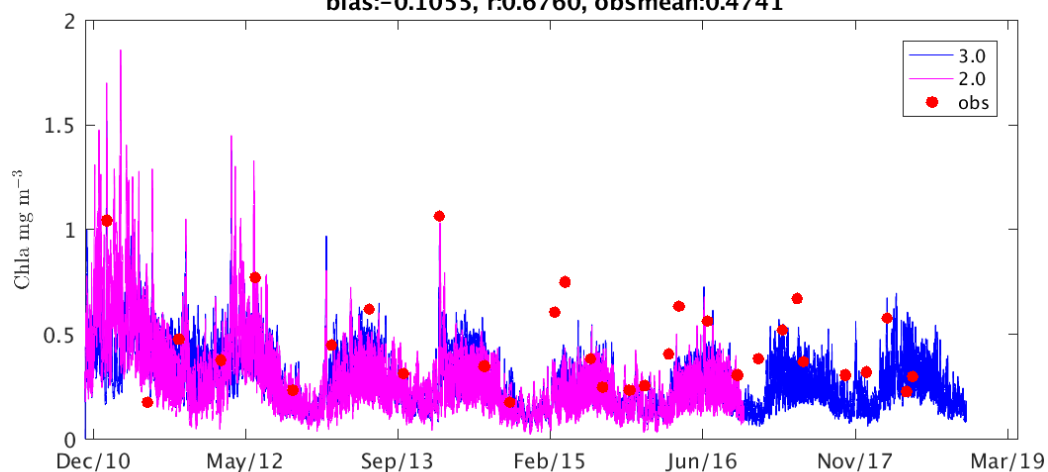

**Russell695\_10m 3.0 d2:0.81, mape:43.1, rms:0.1847**  
**bias:0.0116, r:0.6360, obsmean:0.3693**  
**Russell695\_10m 2.0 d2:0.72, mape:53.6, rms:0.2122**  
**bias:-0.0659, r:0.5254, obsmean:0.3693**

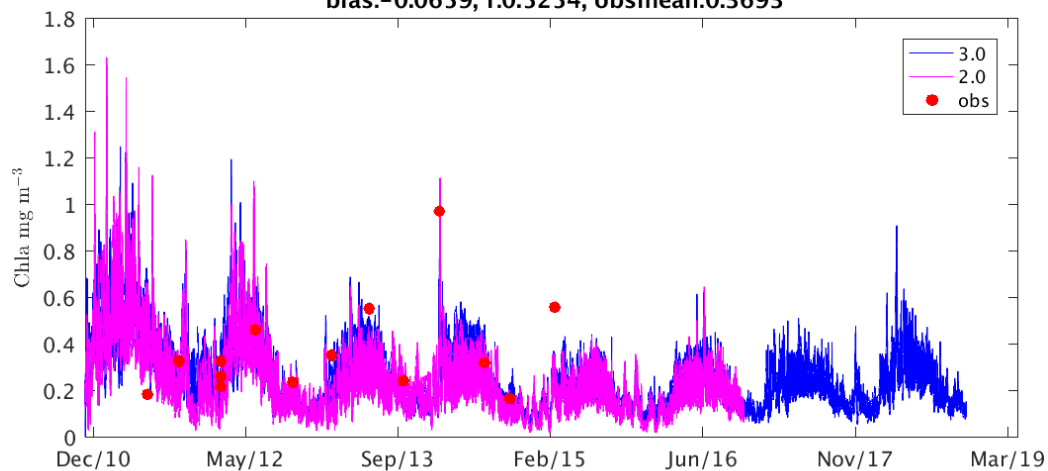



**Russell695\_0m 3.0 d2:0.24, mape:45.5, rms:0.7935**  
**bias:-0.1895, r:0.2573, obsmean:0.4599**  
**Russell695\_0m 2.0 d2:0.71, mape:56.4, rms:0.1937**  
**bias:-0.0597, r:0.5597, obsmean:0.2969**

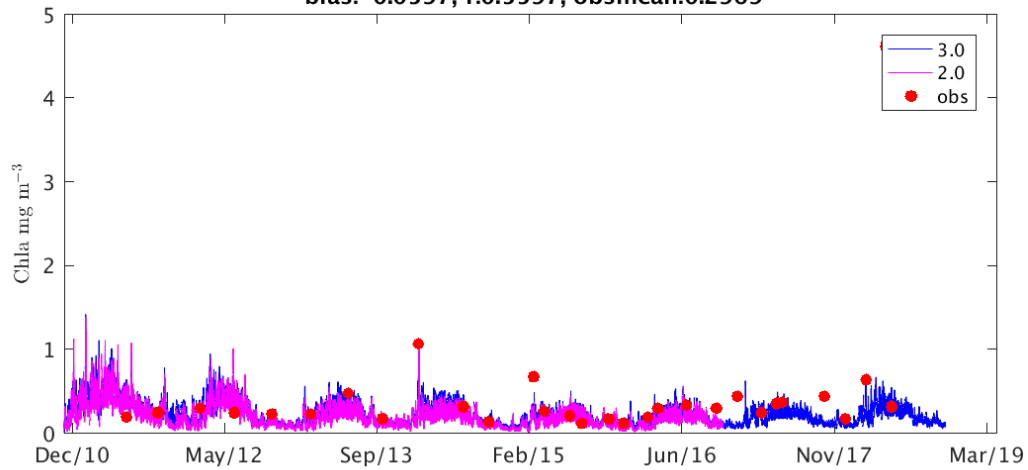

**HighI\_20m 3.0 d2:0.53, mape:44.2, rms:0.3529**  
**bias:-0.1602, r:0.2936, obsmean:0.5876**  
**HighI\_20m 2.0 d2:0.67, mape:48.1, rms:0.3618**  
**bias:-0.0747, r:0.4749, obsmean:0.5432**

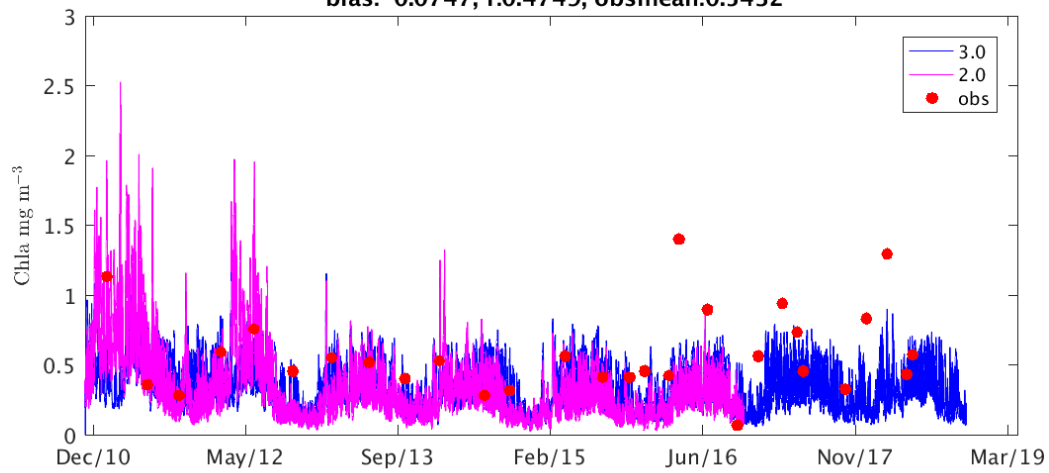

**HighI\_10m 3.0 d2:0.76, mape:40.6, rms:0.2359**  
**bias:0.0434, r:0.6409, obsmean:0.4775**  
**HighI\_10m 2.0 d2:0.81, mape:44.6, rms:0.2709**  
**bias:0.0462, r:0.8420, obsmean:0.4775**

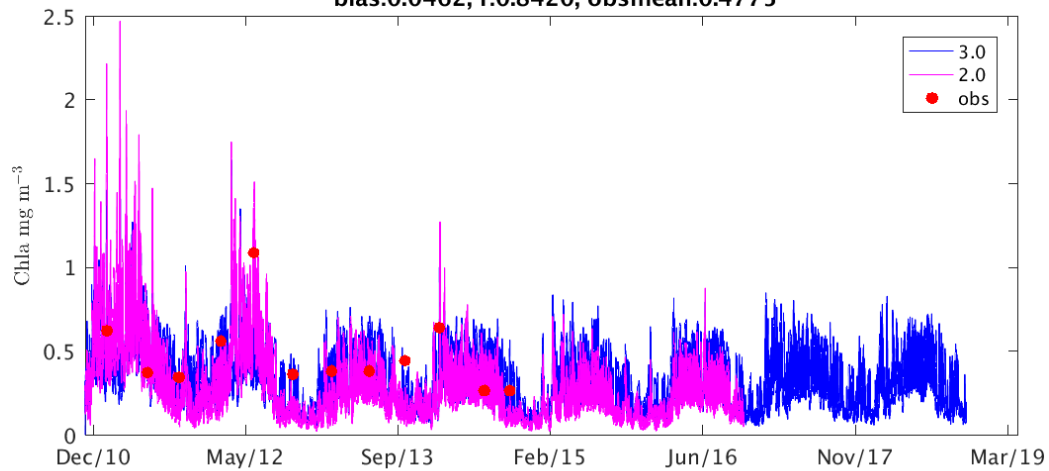

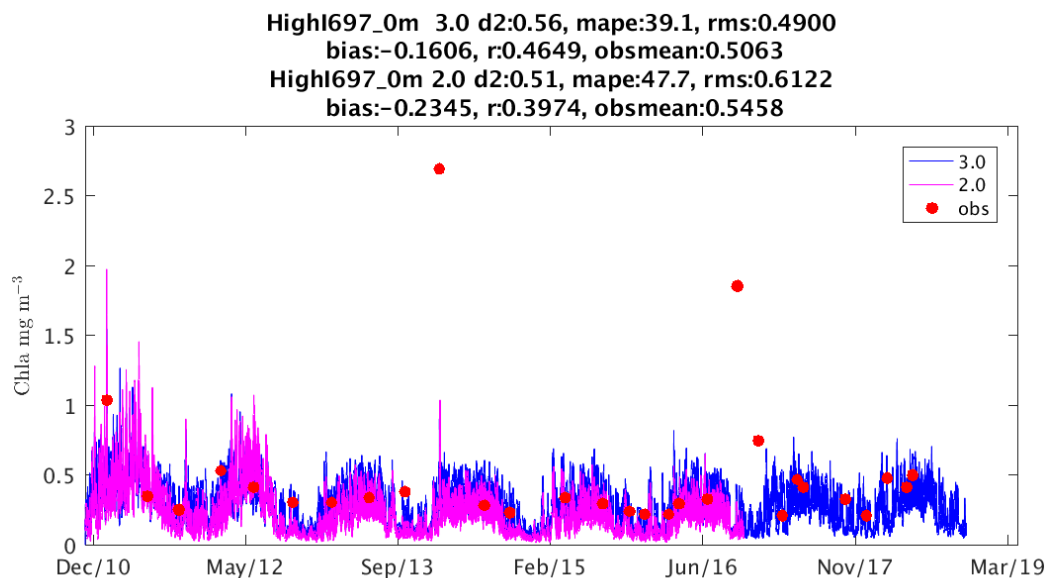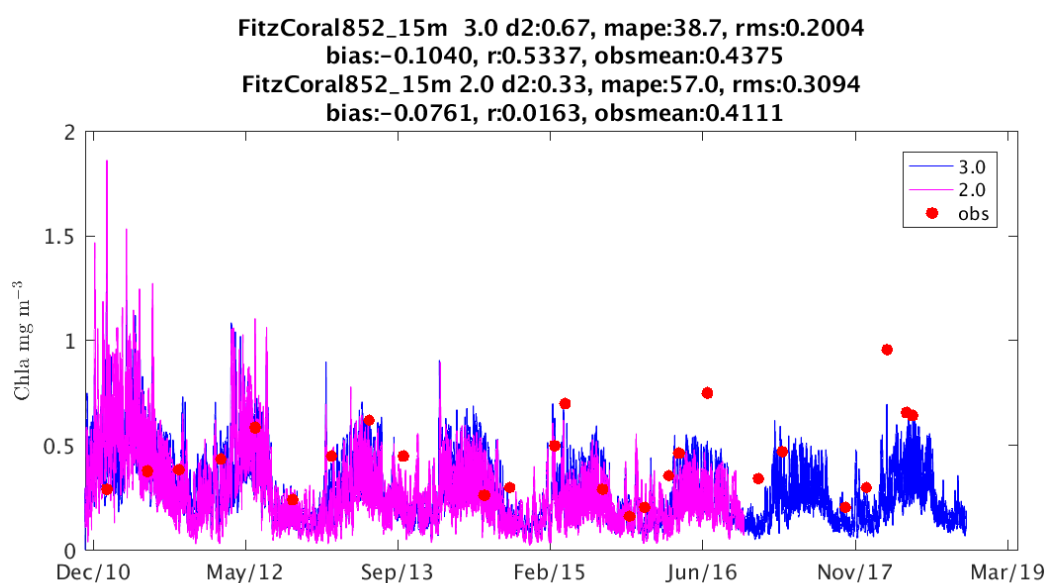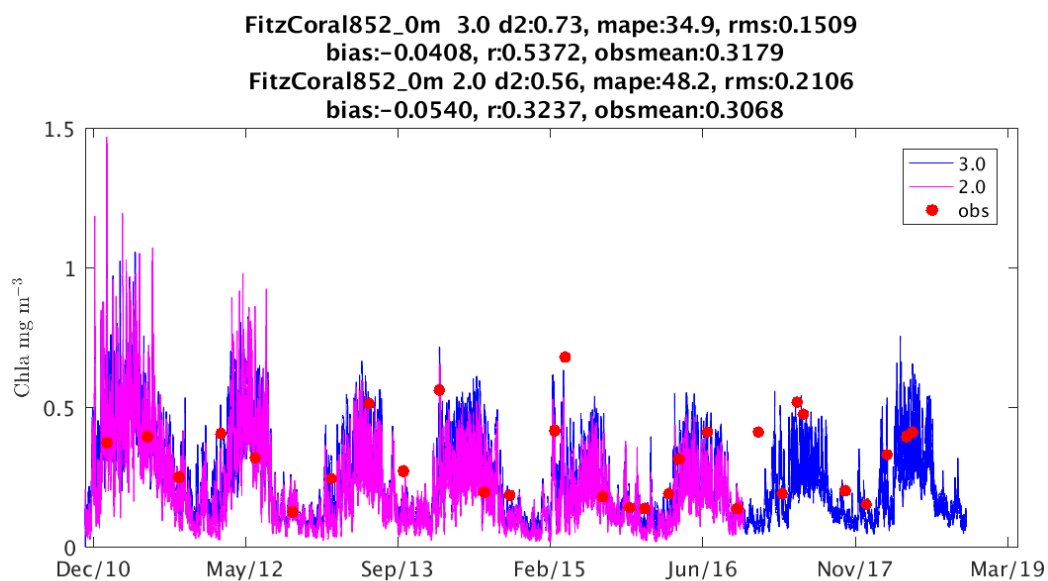

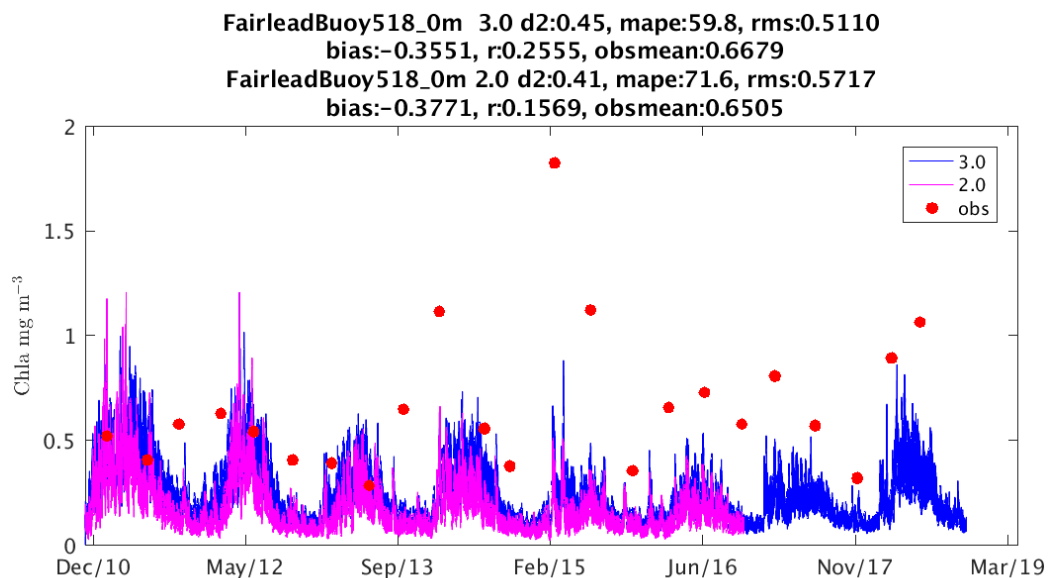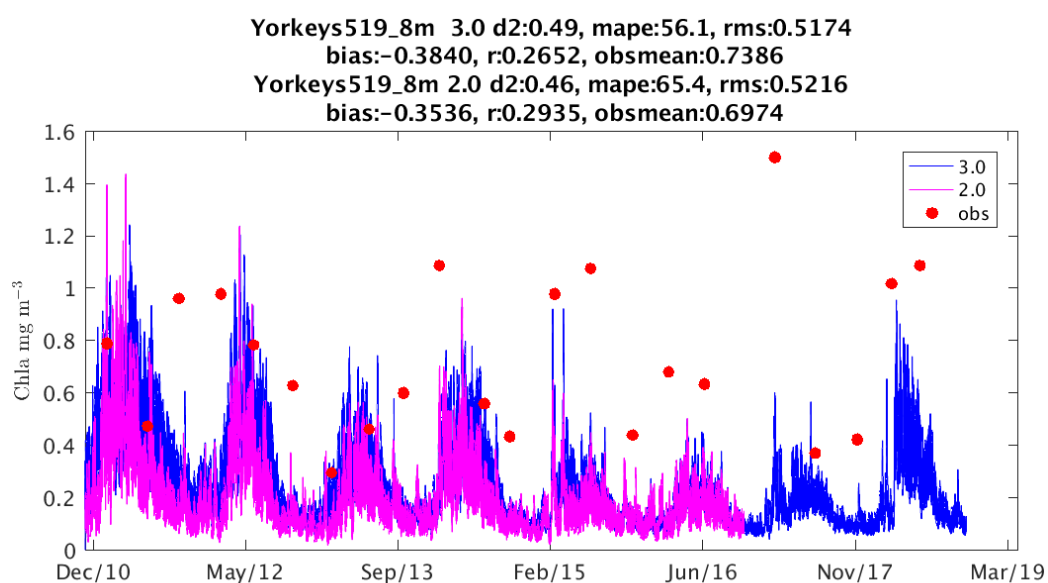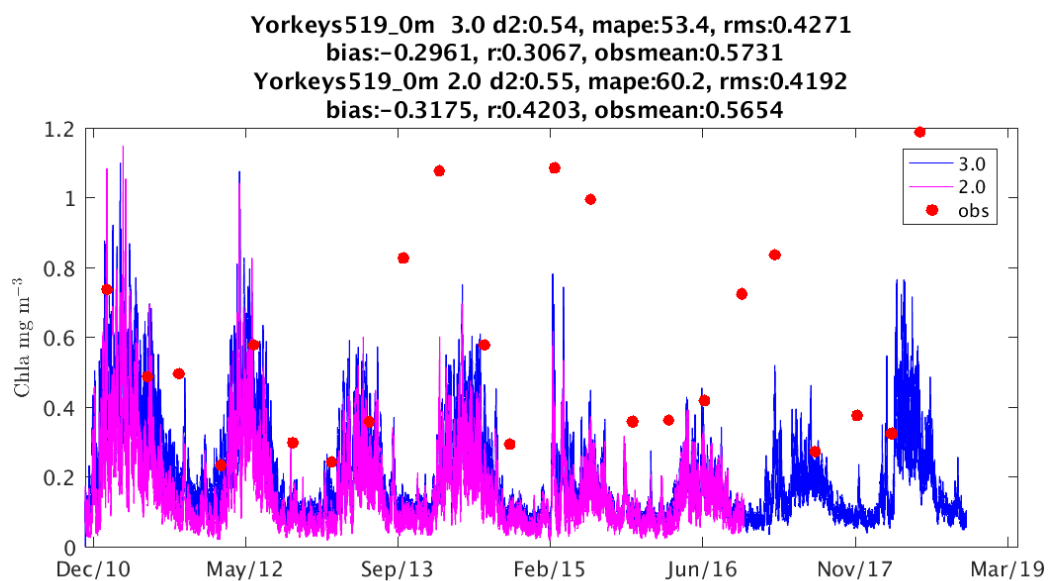

Green830\_36m 3.0 d2:0.77, mape:42.6, rms:0.1302  
 bias:0.0132, r:0.5727, obsmean:0.3083  
 Green830\_36m 2.0 d2:0.68, mape:59.7, rms:0.1901  
 bias:0.0289, r:0.4754, obsmean:0.3009

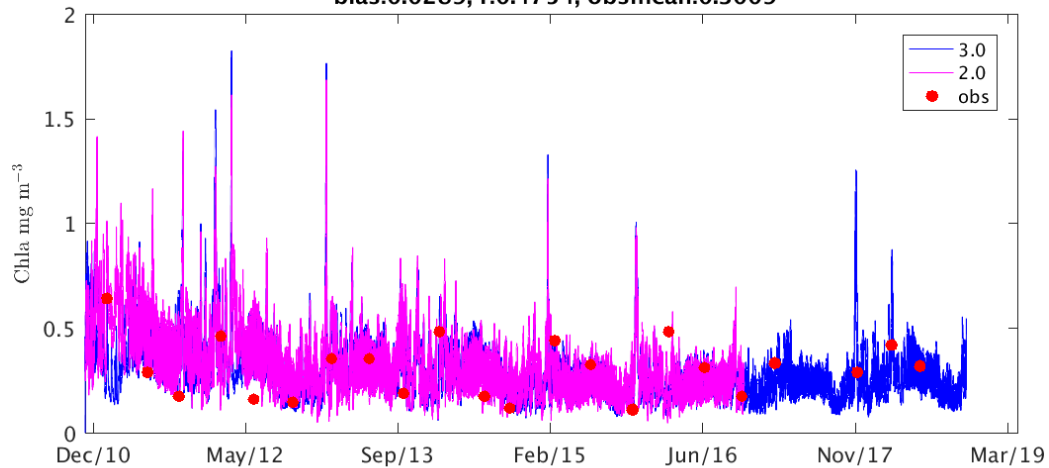

Green830\_18m 3.0 d2:0.86, mape:42.7, rms:0.1654  
 bias:0.0400, r:0.7804, obsmean:0.3134  
 Green830\_18m 2.0 d2:0.75, mape:47.9, rms:0.2277  
 bias:-0.0015, r:0.6213, obsmean:0.3134

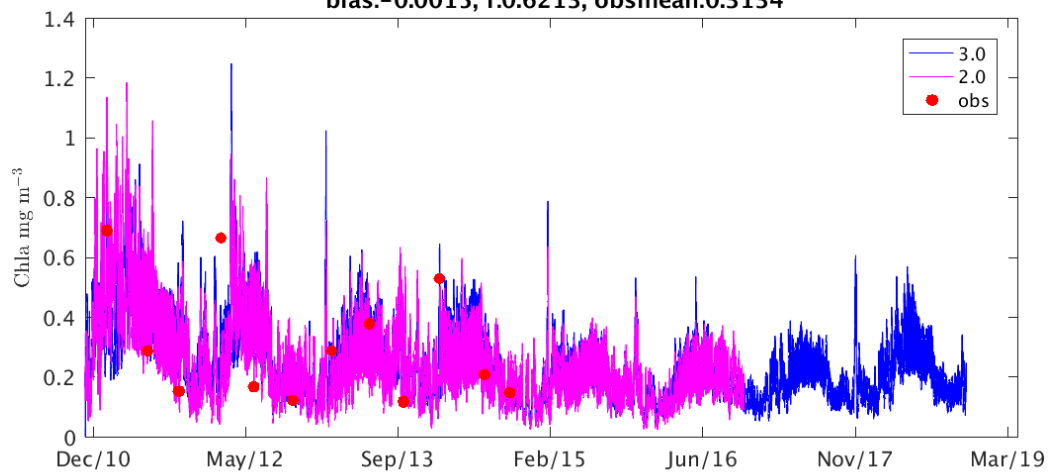

Green830\_0m 3.0 d2:0.56, mape:34.2, rms:0.2756  
 bias:-0.0867, r:0.5624, obsmean:0.3272  
 Green830\_0m 2.0 d2:0.49, mape:39.2, rms:0.3629  
 bias:-0.1369, r:0.3158, obsmean:0.3434

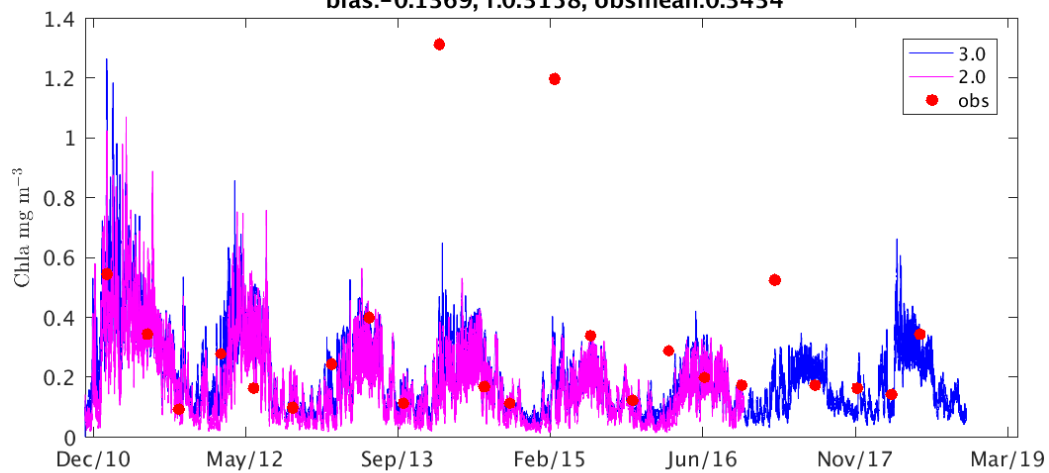

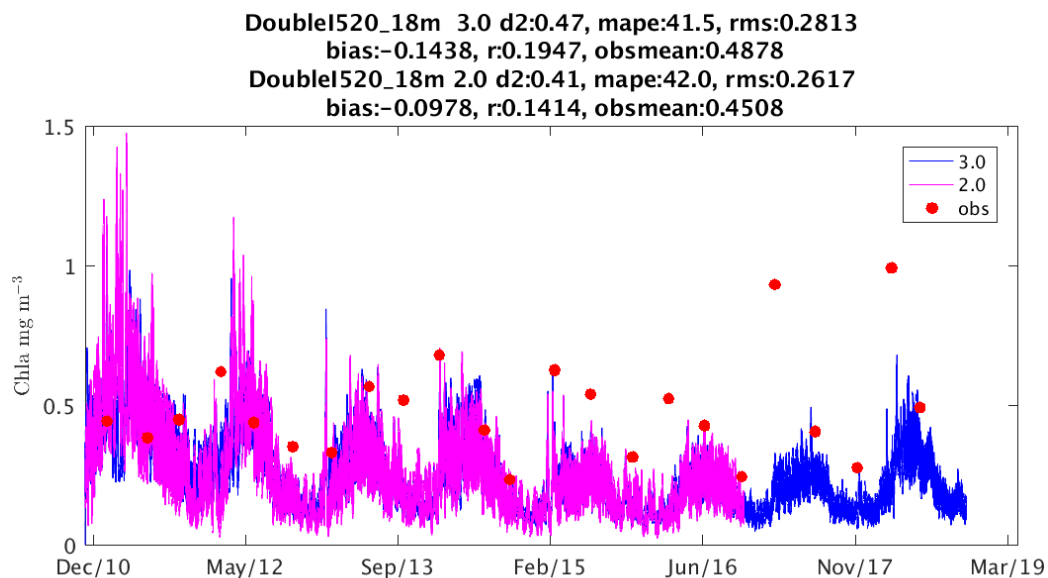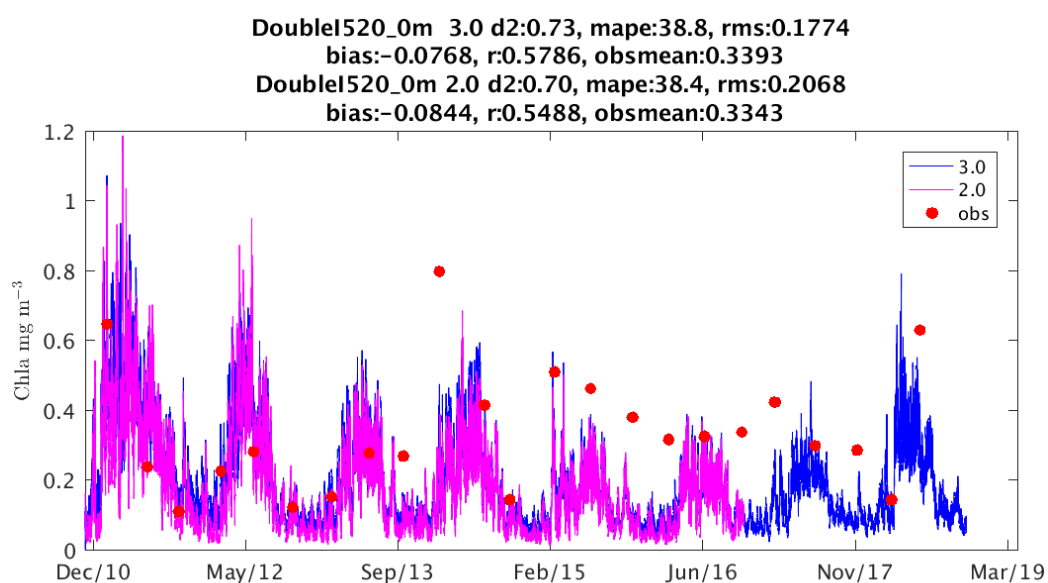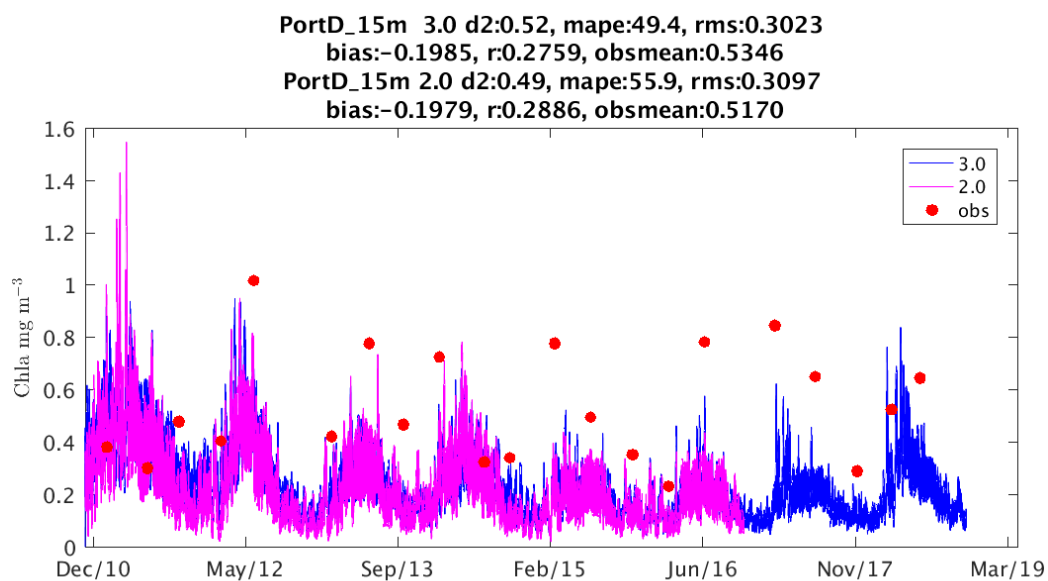

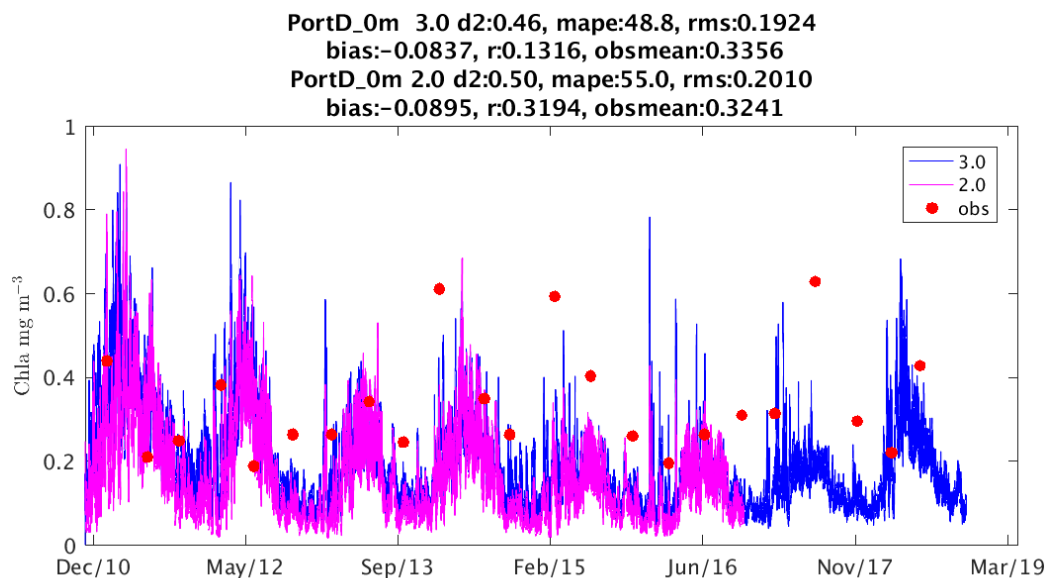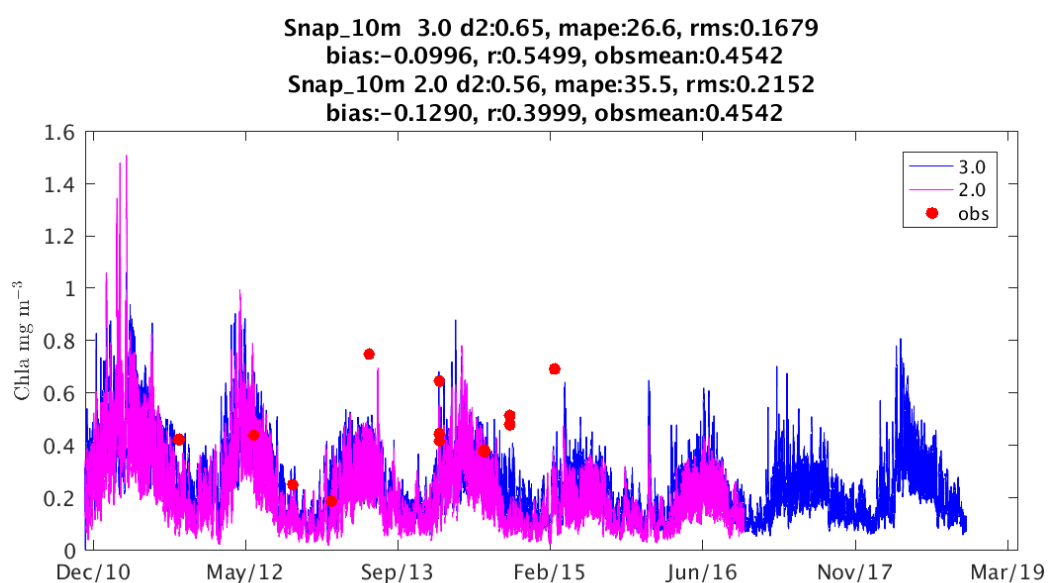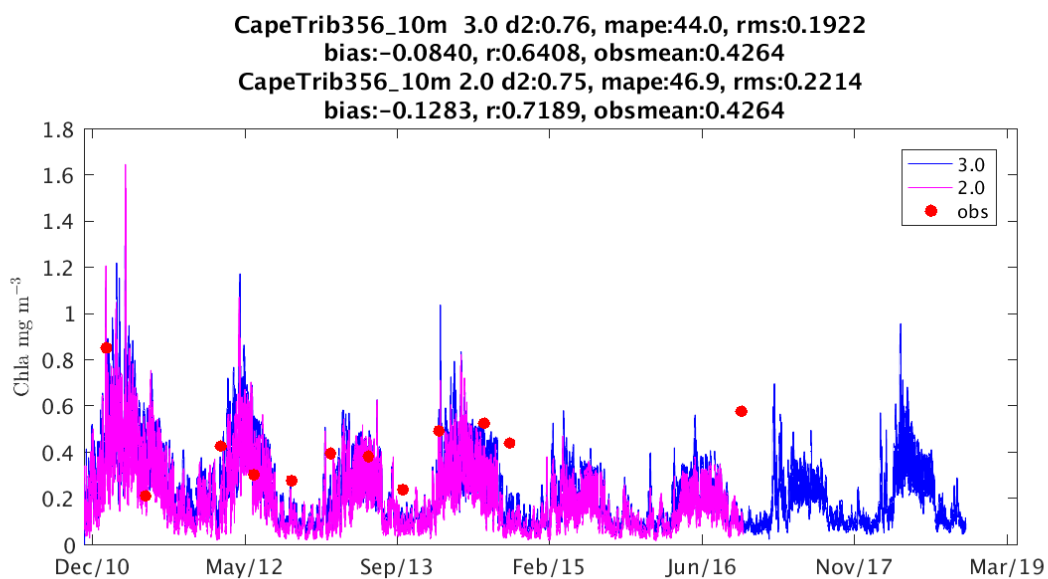

## 11. Simulated Secchi depth assessment against AIMS Long Term Monitoring

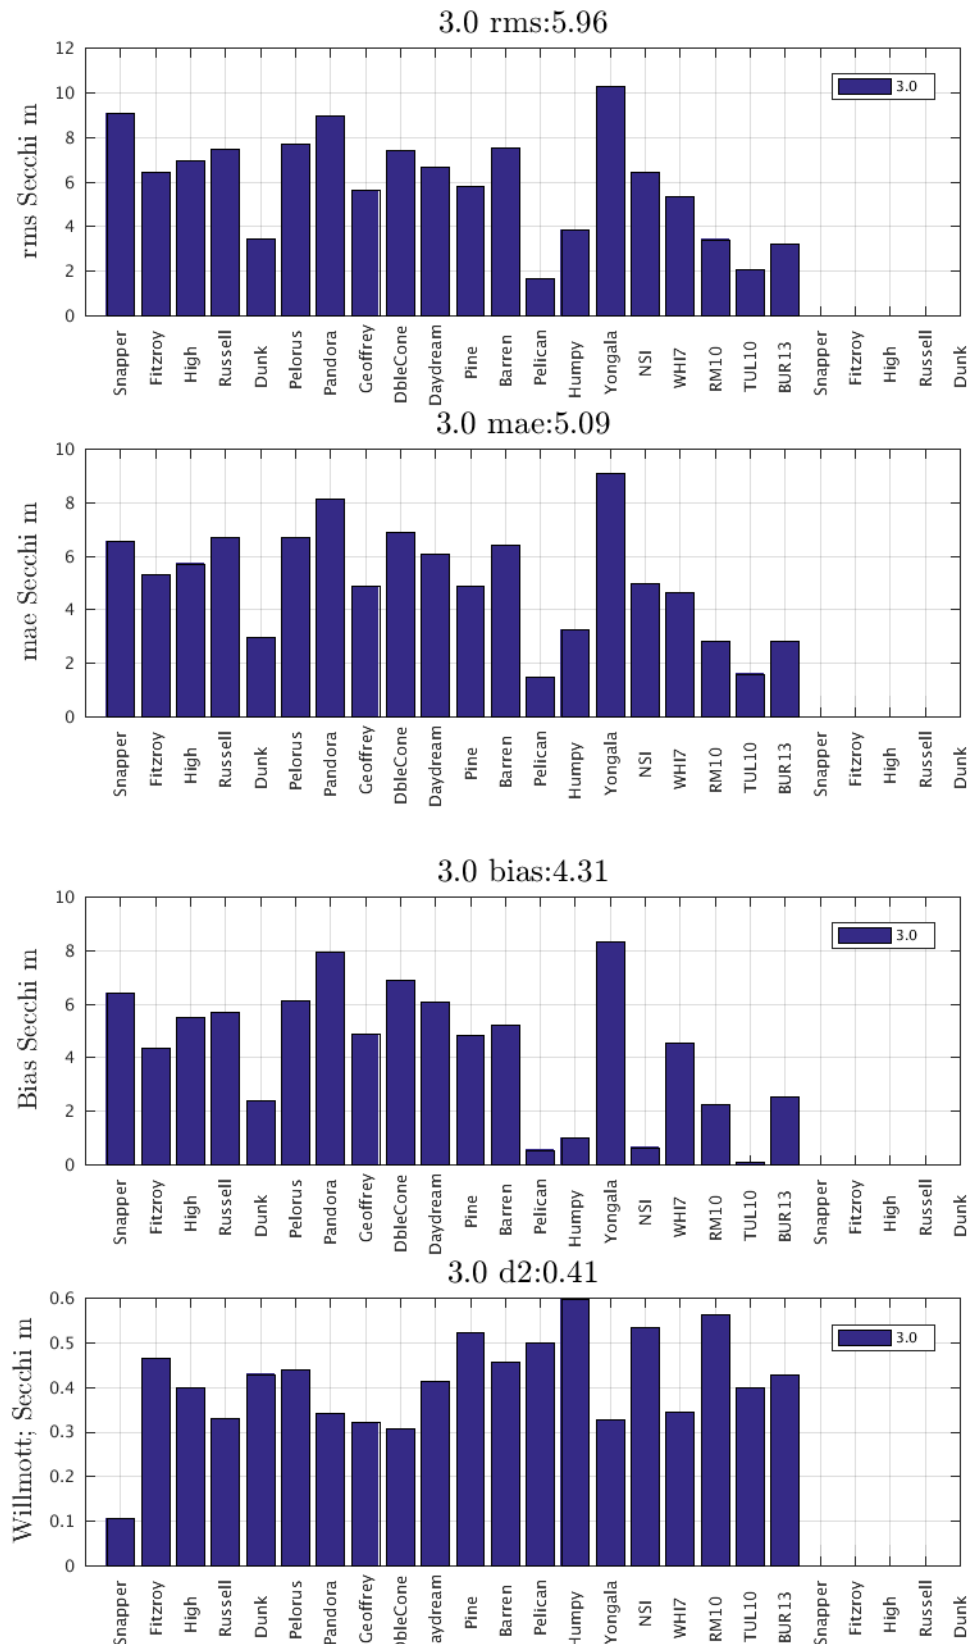

Figure 5 Metrics for Long Term Monitoring sites Secchi depth assessment against observations for model version 3p0, d2 = Willmott index see Statistical metric page 27.mae:mean absolute error, rms root mean square

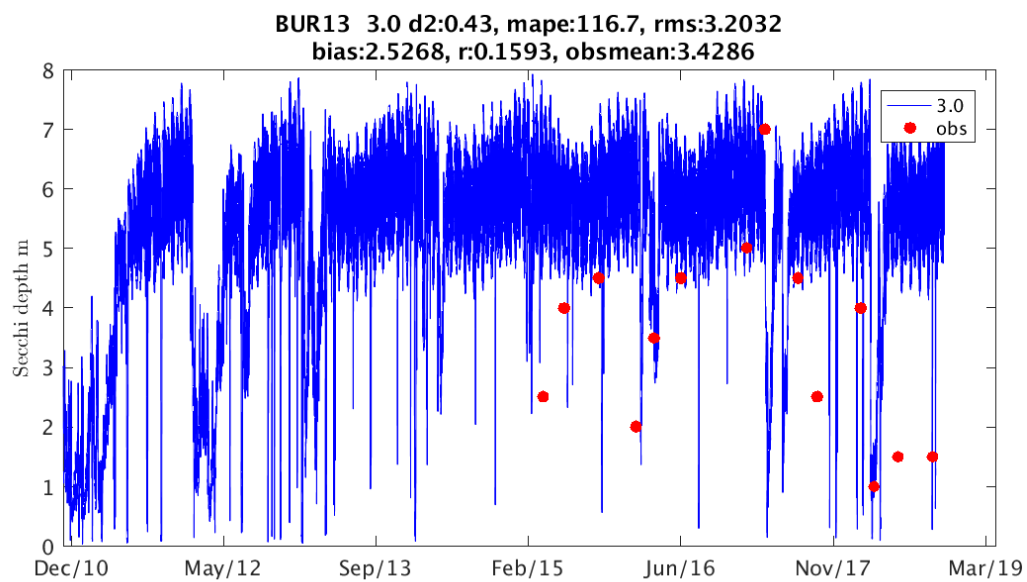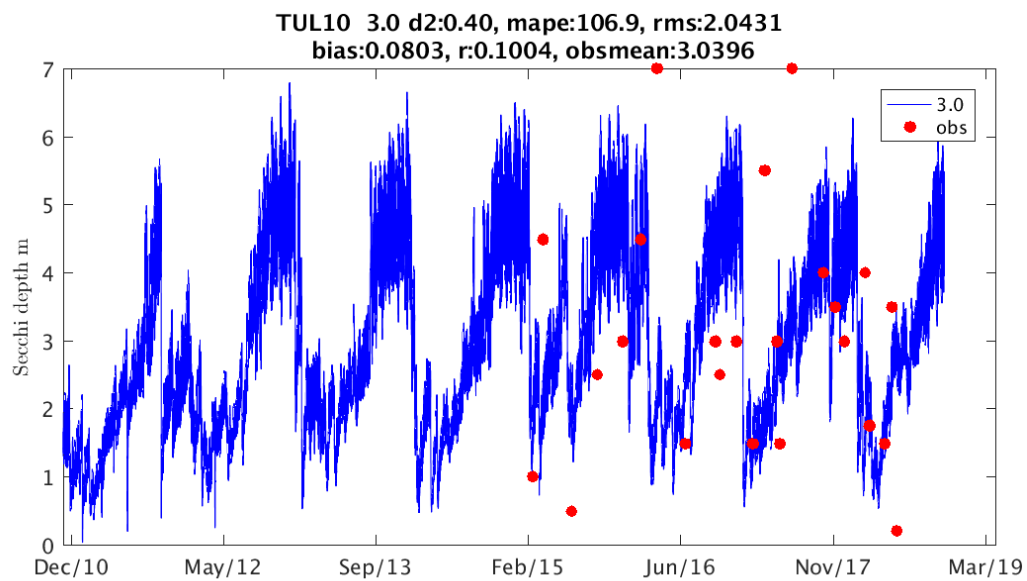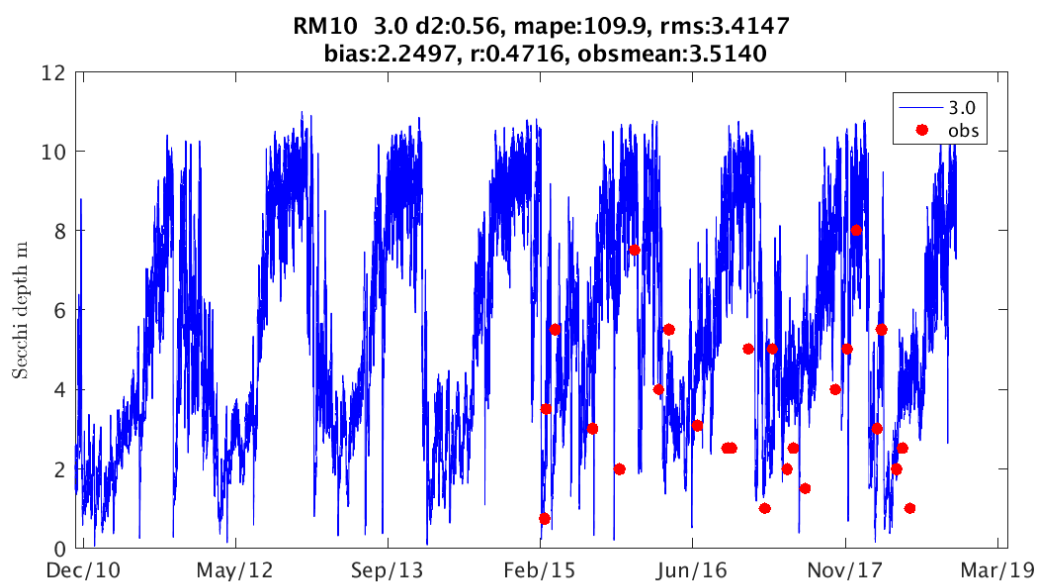



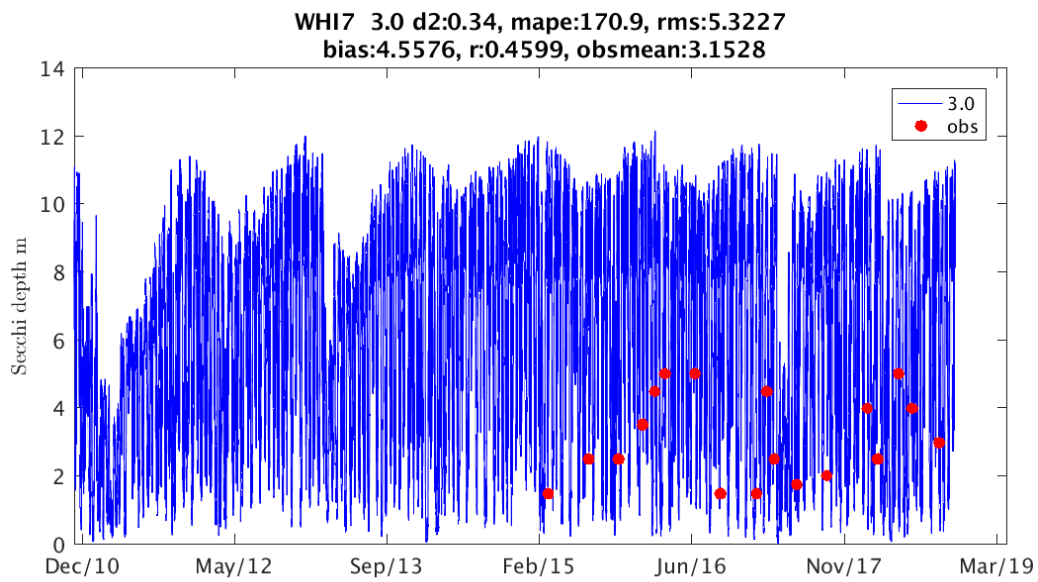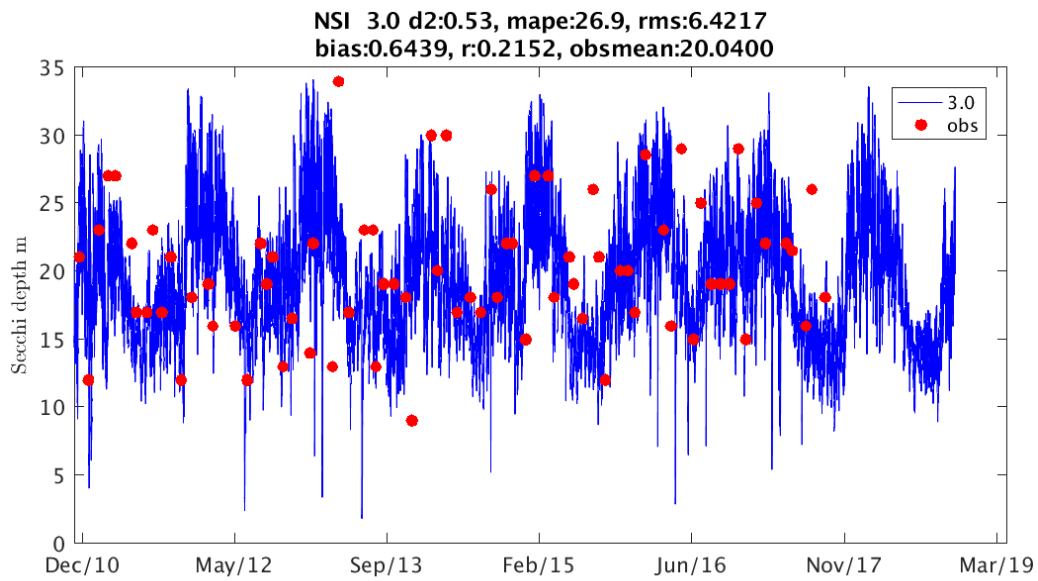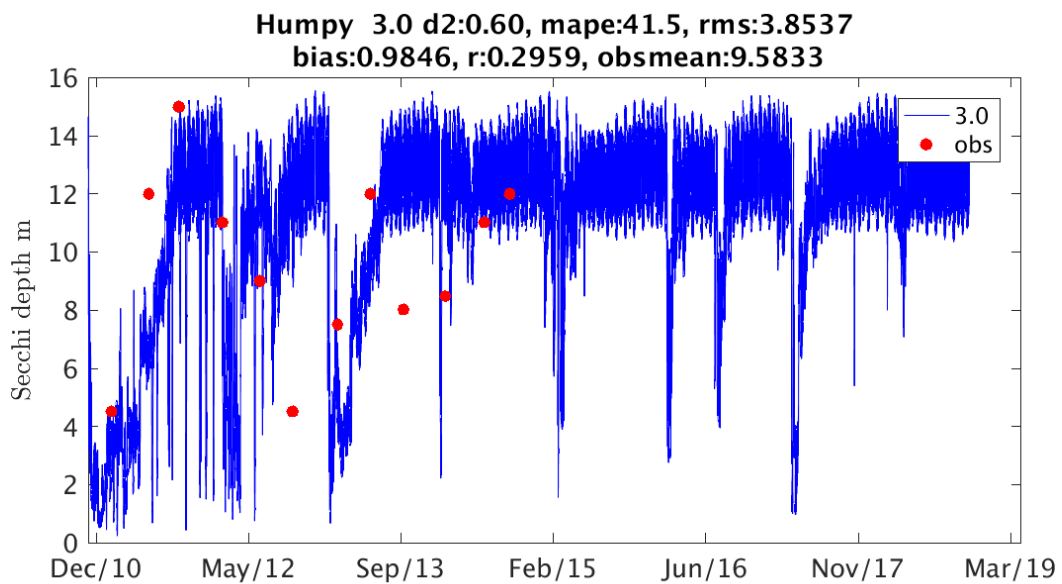

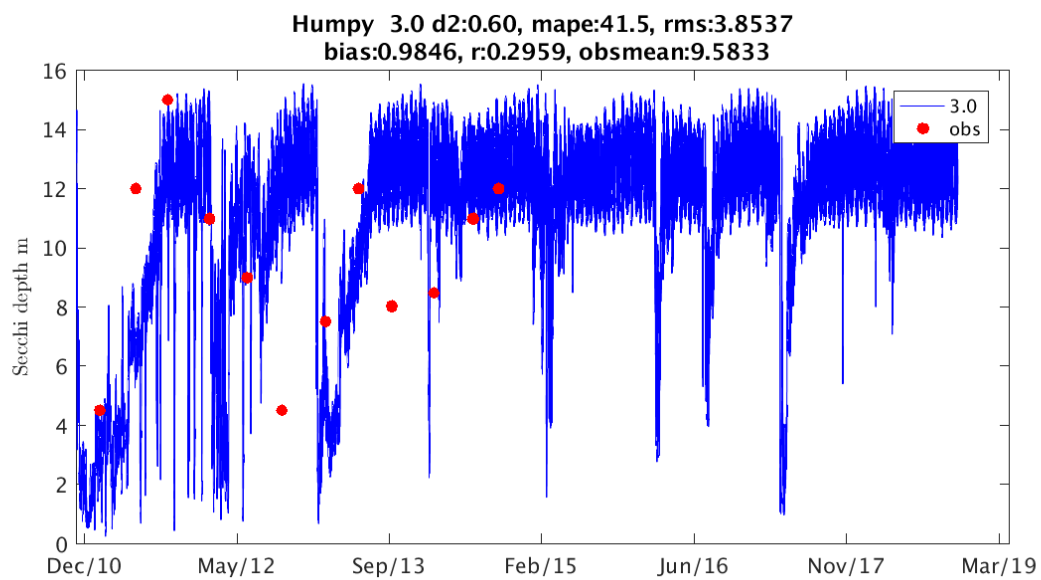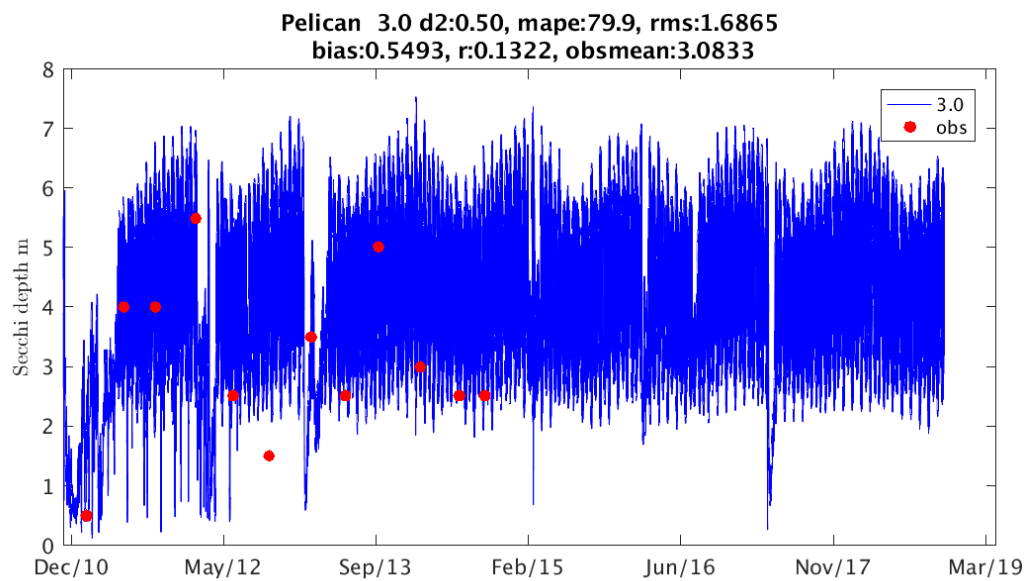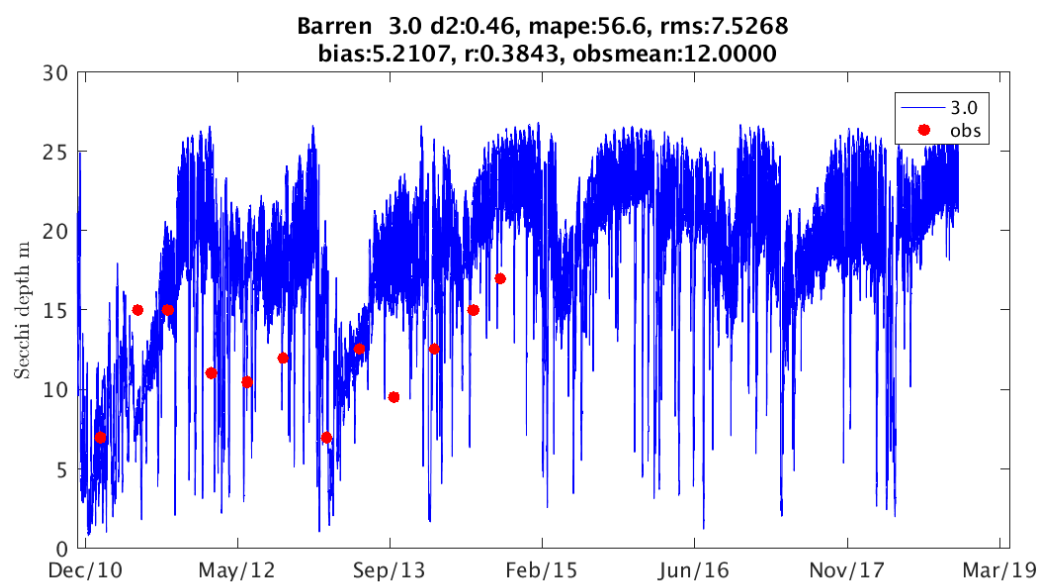

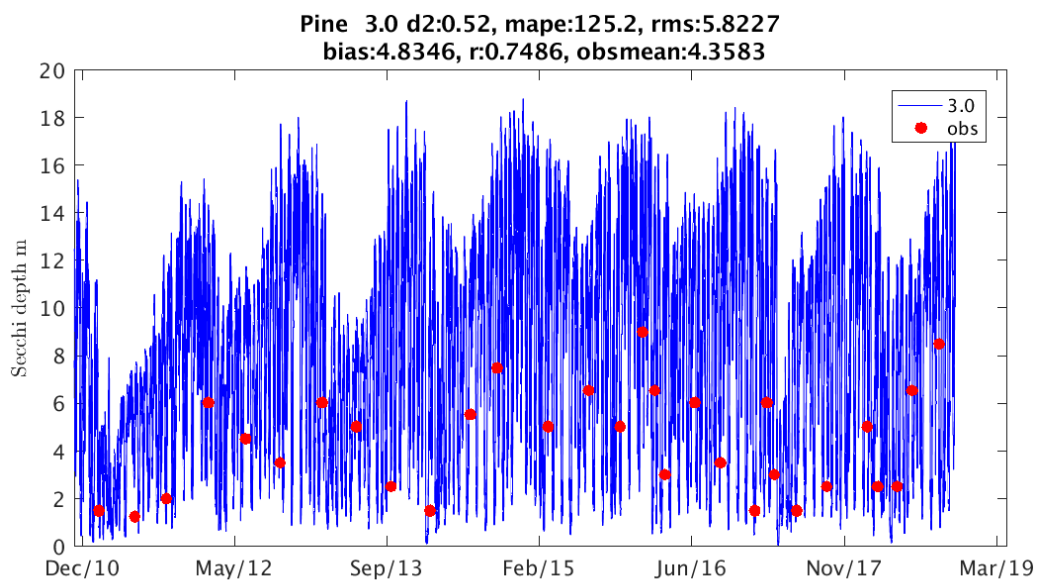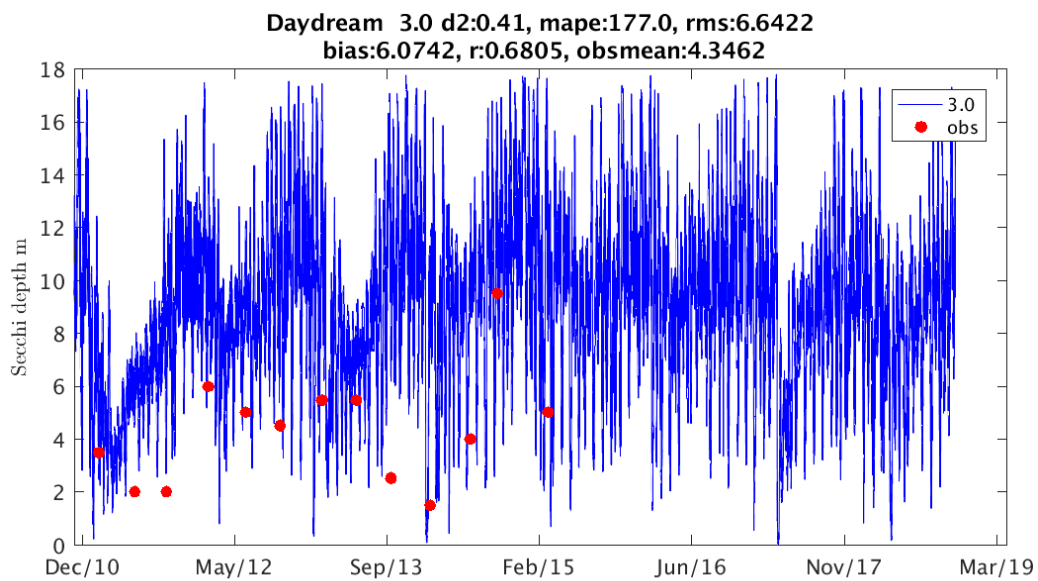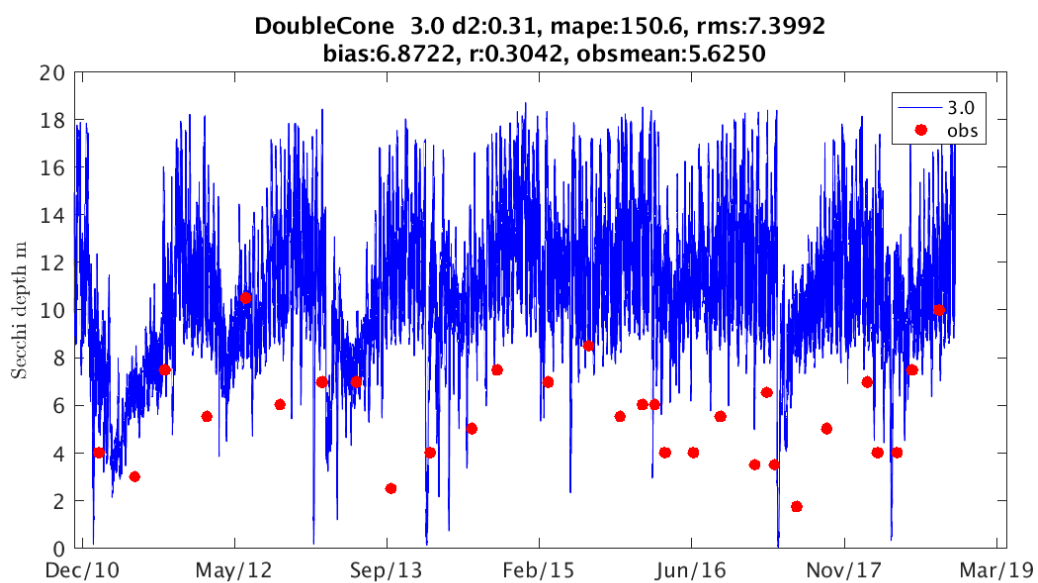

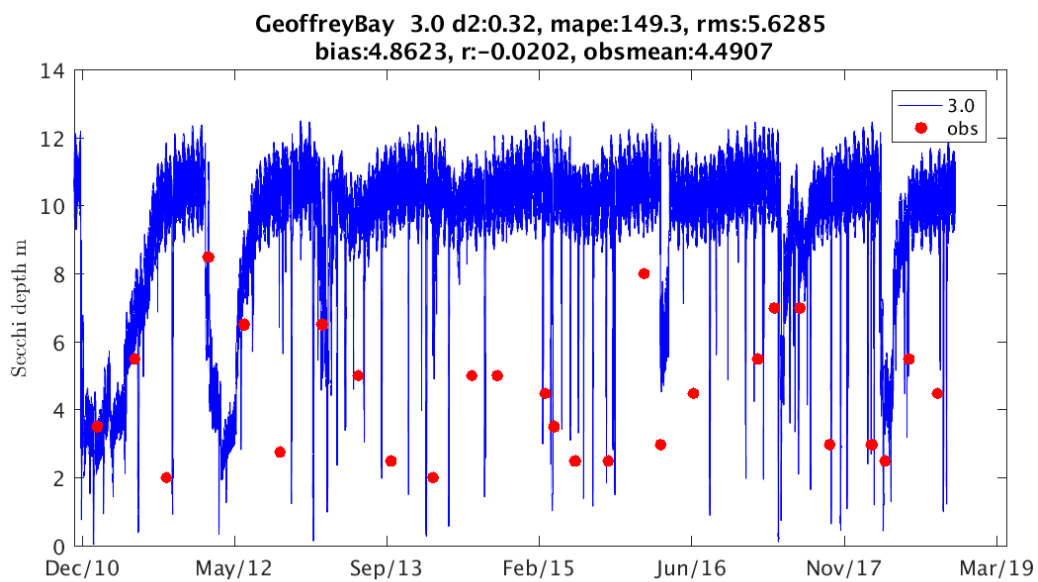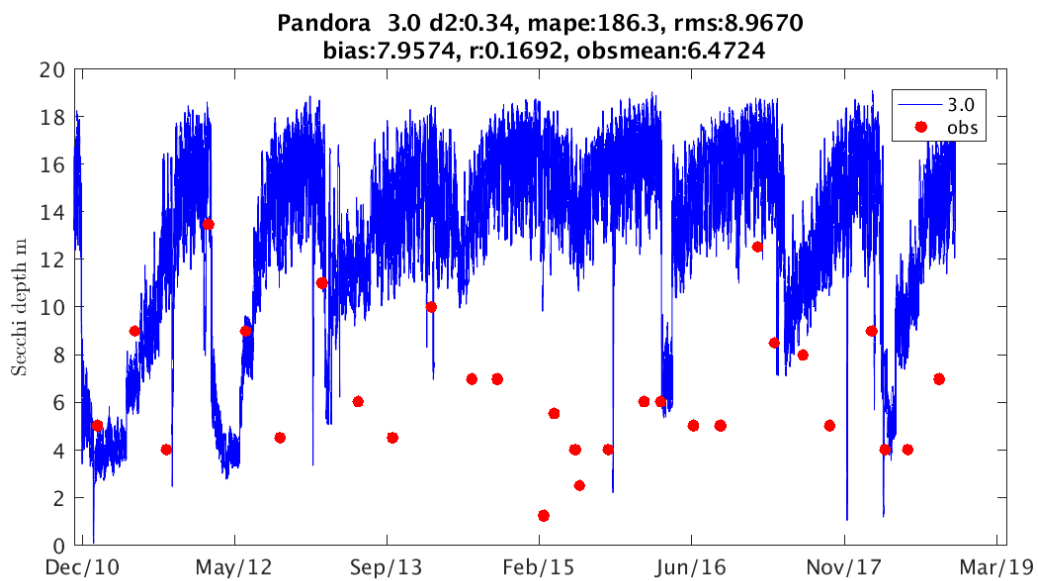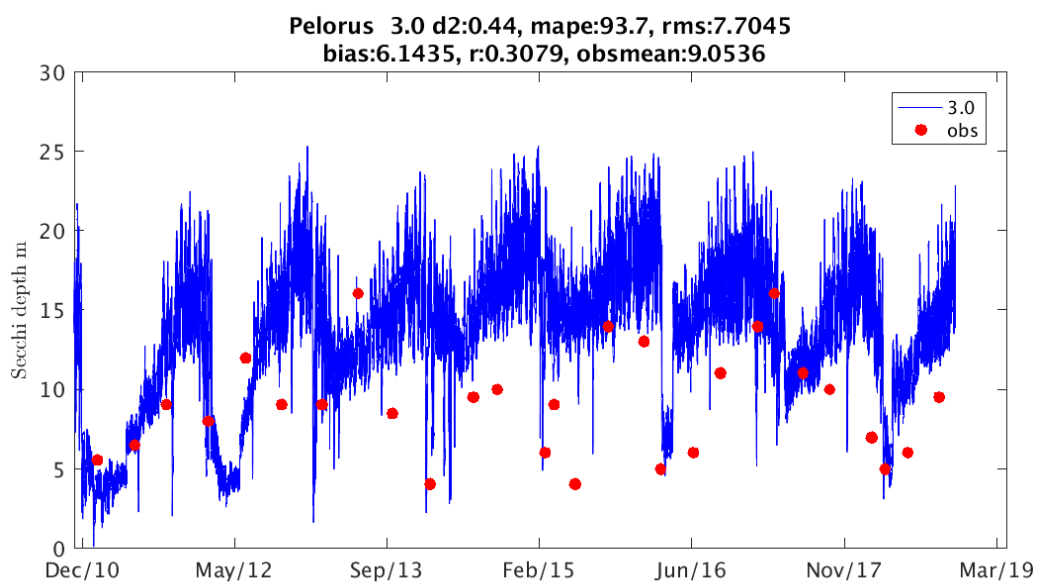

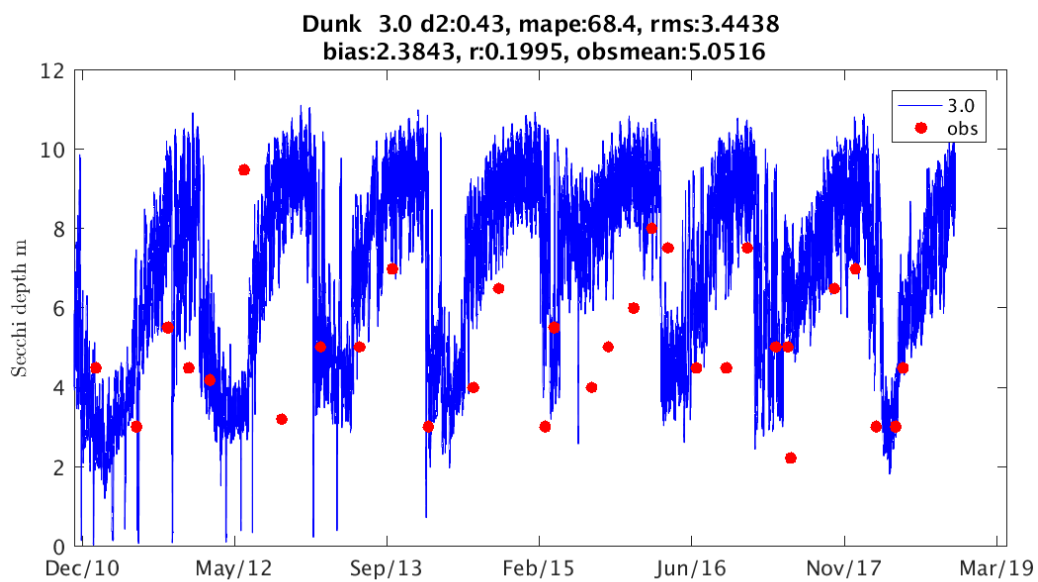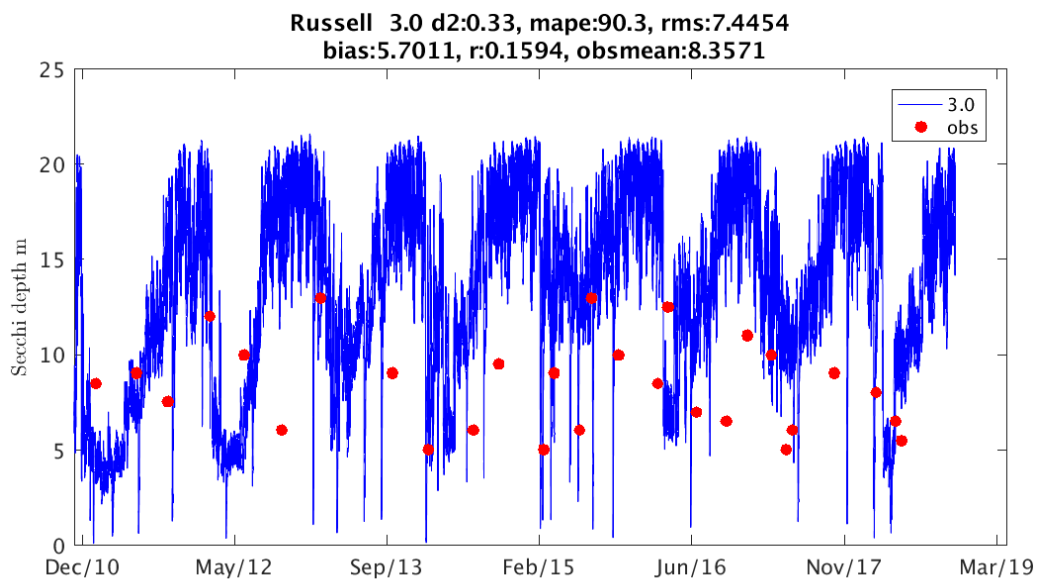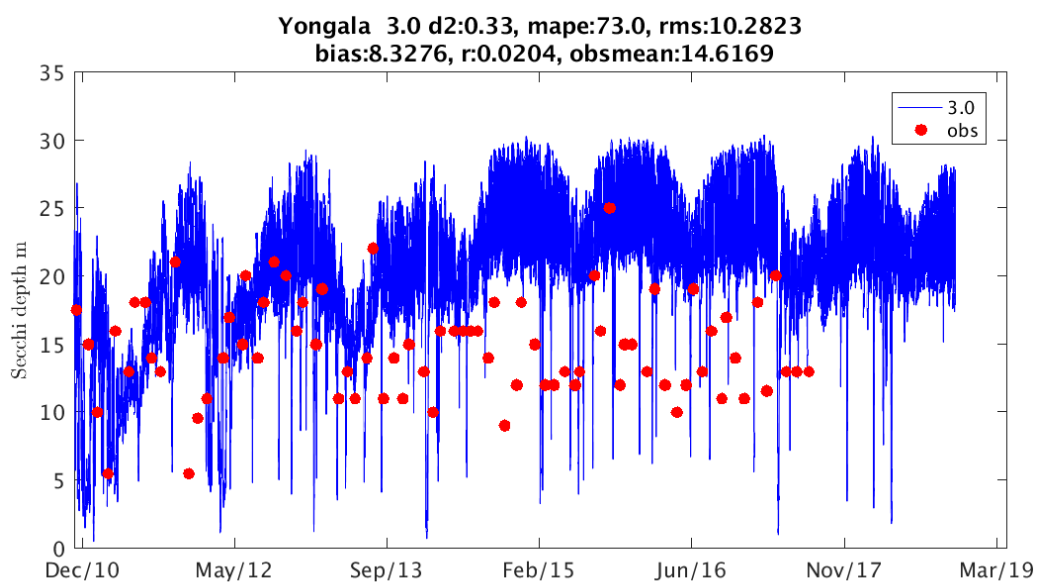

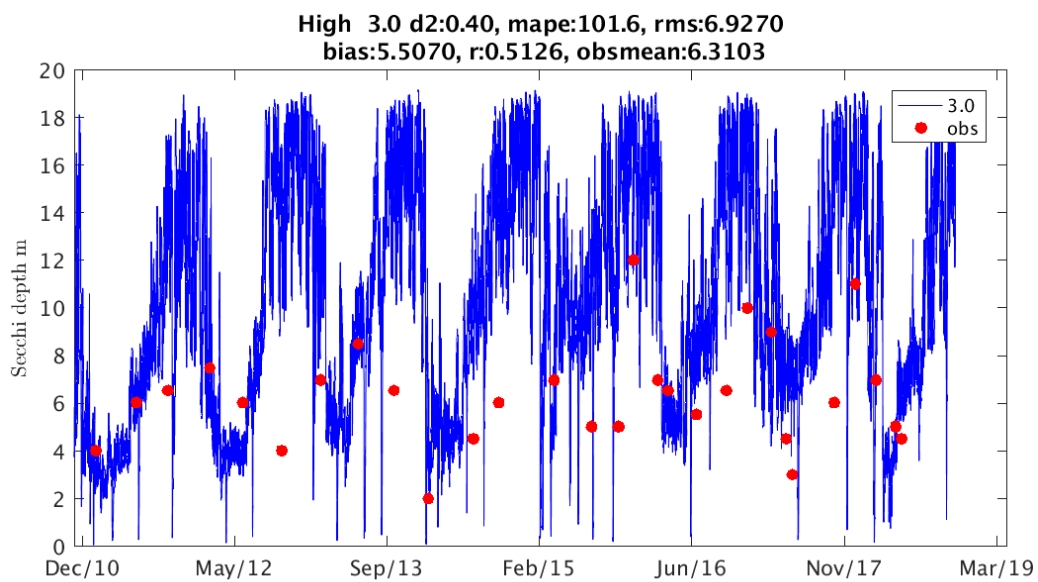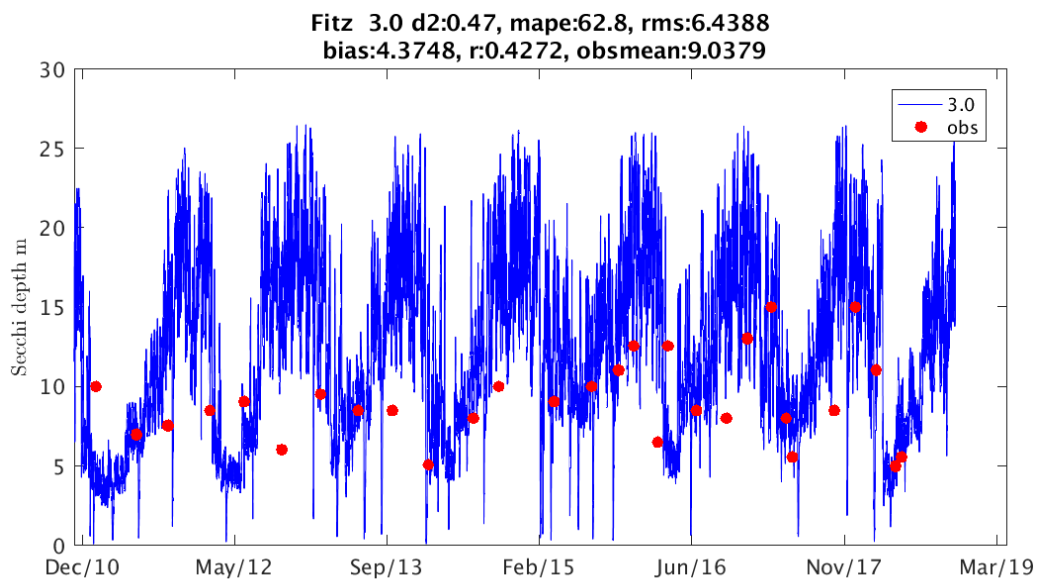

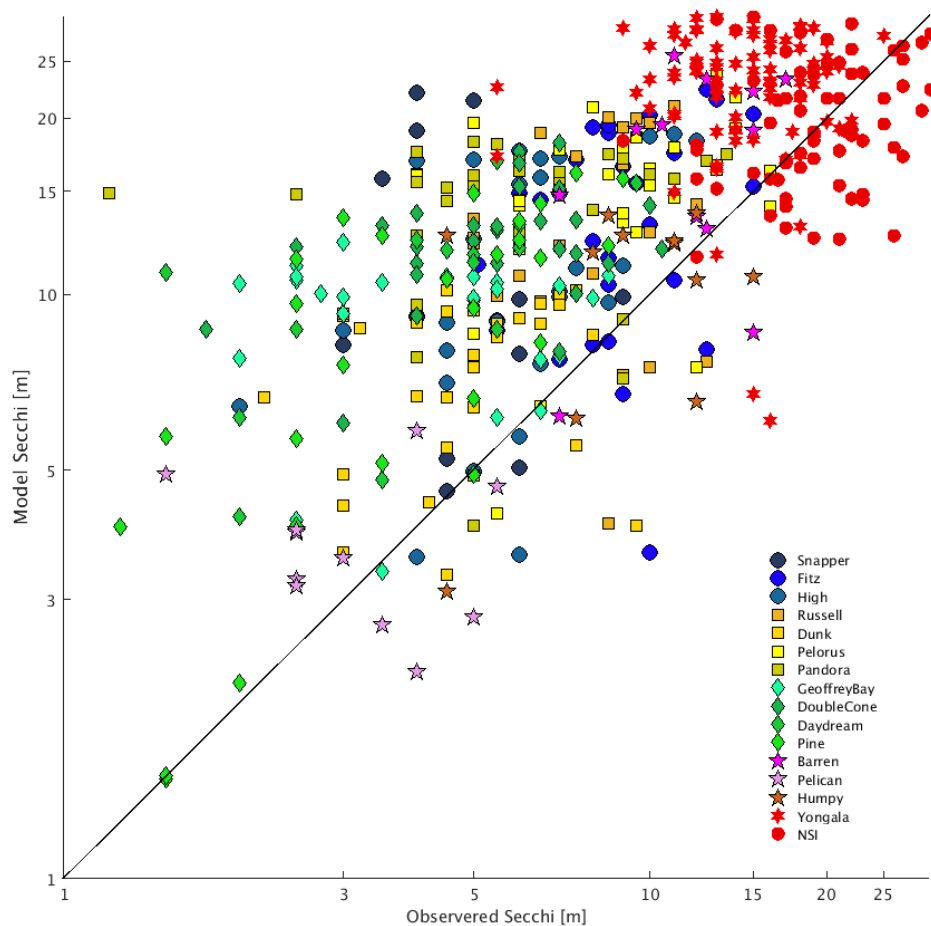

Figure 6 Scatter plot of observed Secchi for long Term Monitoring sites and NRS sites (Yongala and North Stradbroke) assessment against simulated Secchi for model version 3p0

## 12. Simulated DIP assessment against AIMS Long Term Monitoring

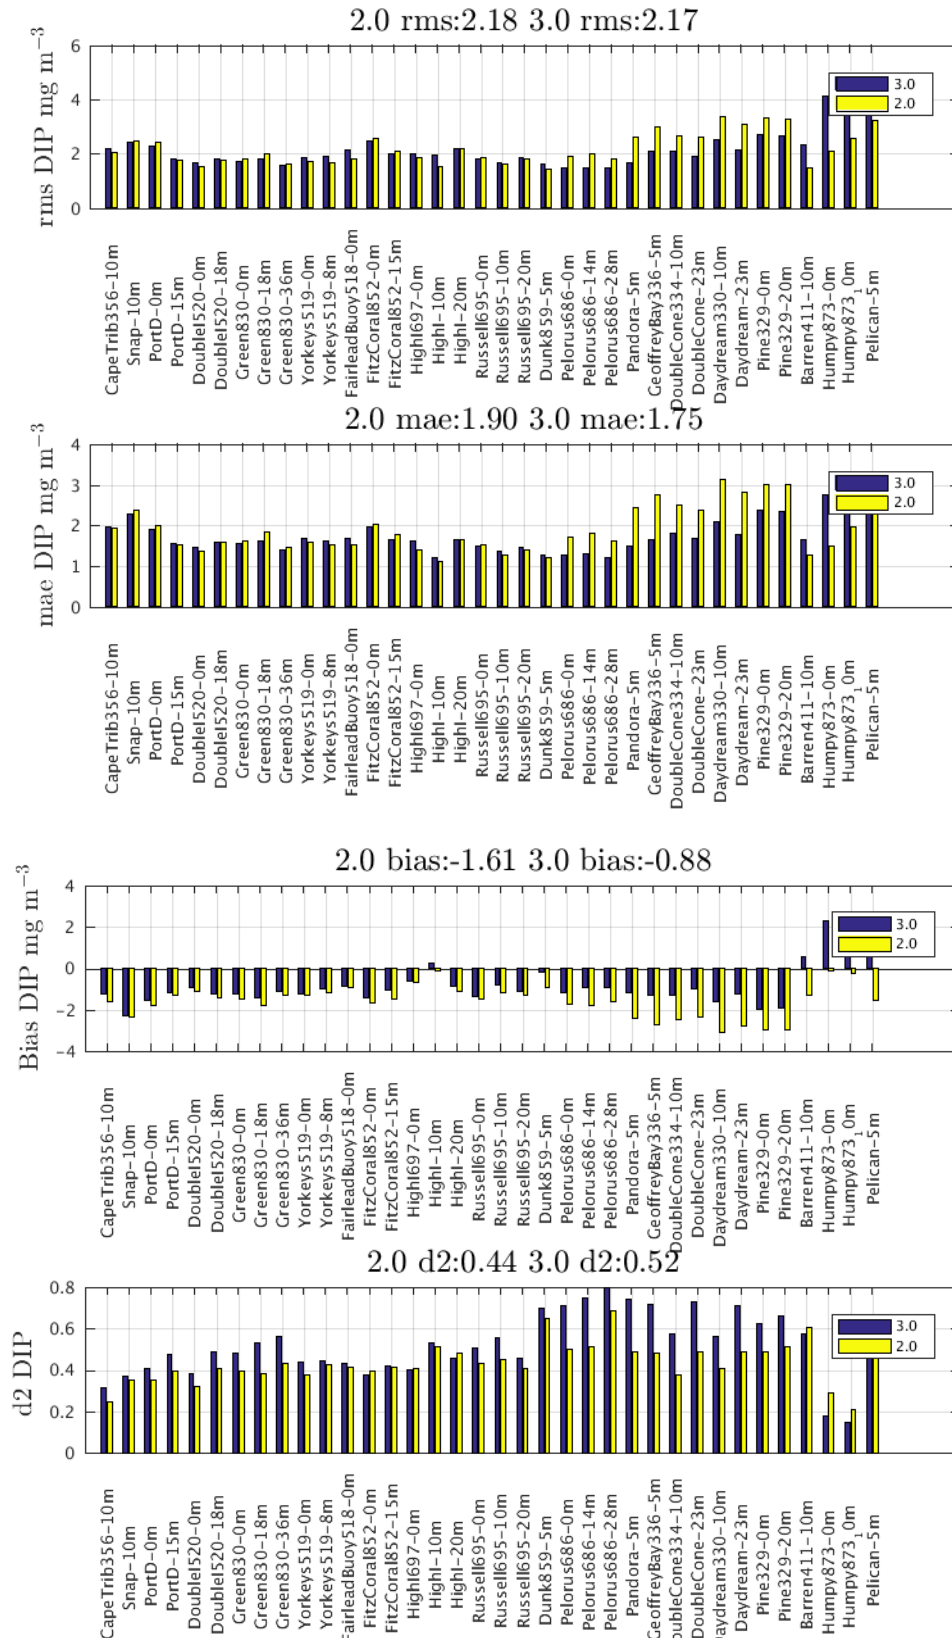

Figure 7 Metrics for Long Term Monitoring sites DIP assessment against observations for model version 3p0 and 2p0  
d2 = Willmott index see Statistical metric page 27.mae:mean absolute error, rms root mean square



Pelican\_5m 3.0 d2:0.52, mape:60.1, rms:4.4336  
 bias:0.9543, r:0.5008, obsmean:4.7562  
 Pelican\_5m 2.0 d2:0.62, mape:57.9, rms:3.2174  
 bias:-1.5309, r:0.4775, obsmean:4.7562

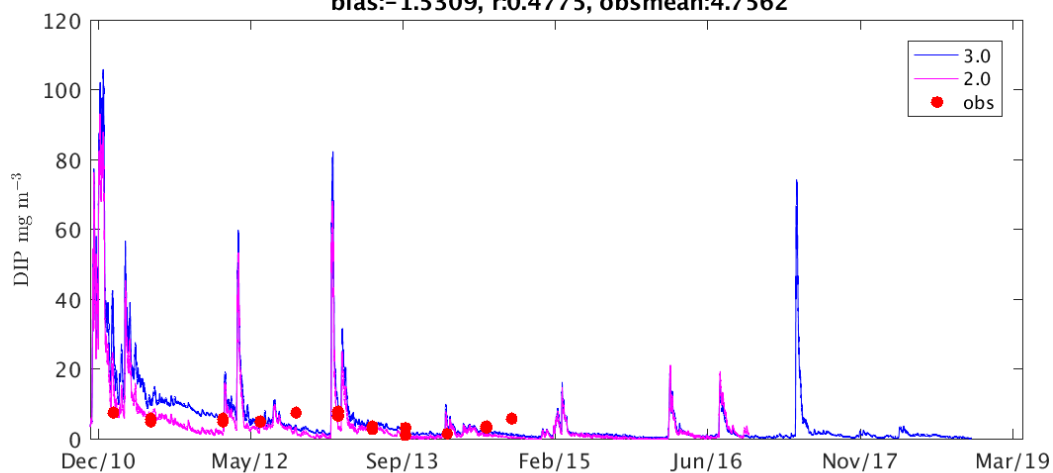

Humpy873\_10m 3.0 d2:0.15, mape:220.4, rms:4.2733  
 bias:1.7741, r:-0.2305, obsmean:2.3653  
 Humpy873\_10m 2.0 d2:0.20, mape:136.1, rms:2.5691  
 bias:-0.2720, r:-0.2297, obsmean:2.3653

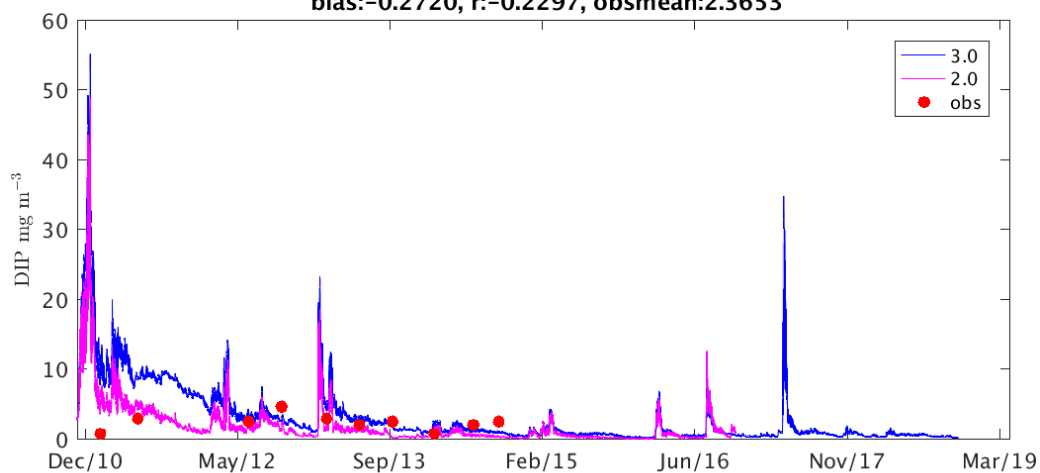

Humpy873\_0m 3.0 d2:0.18, mape:136.5, rms:4.1244  
 bias:2.2803, r:0.1179, obsmean:2.2715  
 Humpy873\_0m 2.0 d2:0.29, mape:68.9, rms:2.1009  
 bias:-0.1184, r:0.0260, obsmean:2.2715

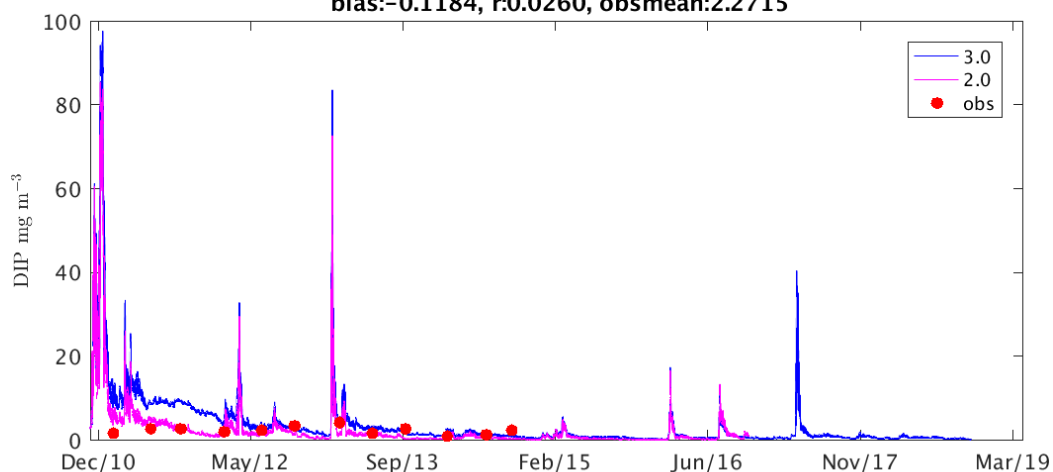

Barren411\_10m 3.0 d2:0.58, mape:67.9, rms:2.3439  
 bias:0.5380, r:0.6883, obsmean:2.1001  
 Barren411\_10m 2.0 d2:0.61, mape:67.6, rms:1.4913  
 bias:-1.2843, r:0.6697, obsmean:2.1001

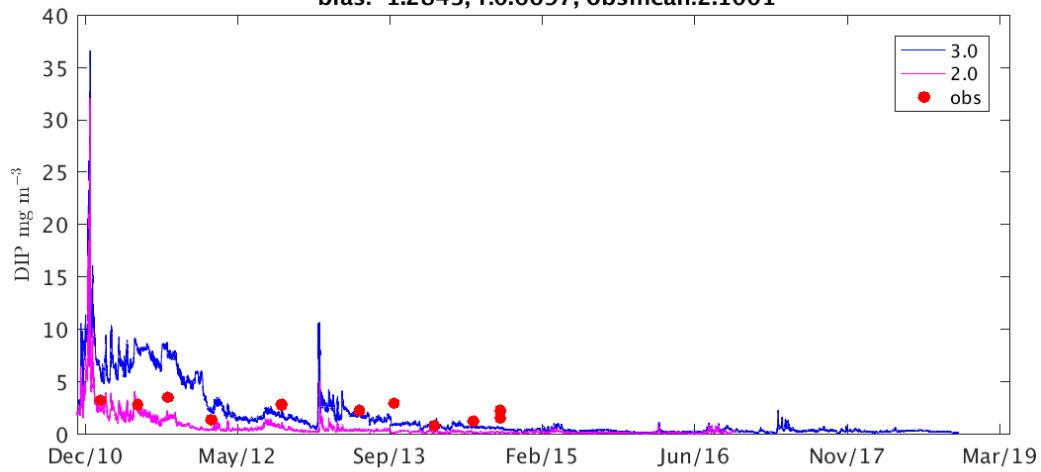

Pine329\_20m 3.0 d2:0.66, mape:71.0, rms:2.6551  
 bias:-1.9380, r:0.6373, obsmean:3.5062  
 Pine329\_20m 2.0 d2:0.51, mape:81.7, rms:3.2758  
 bias:-2.9881, r:0.6426, obsmean:3.7783

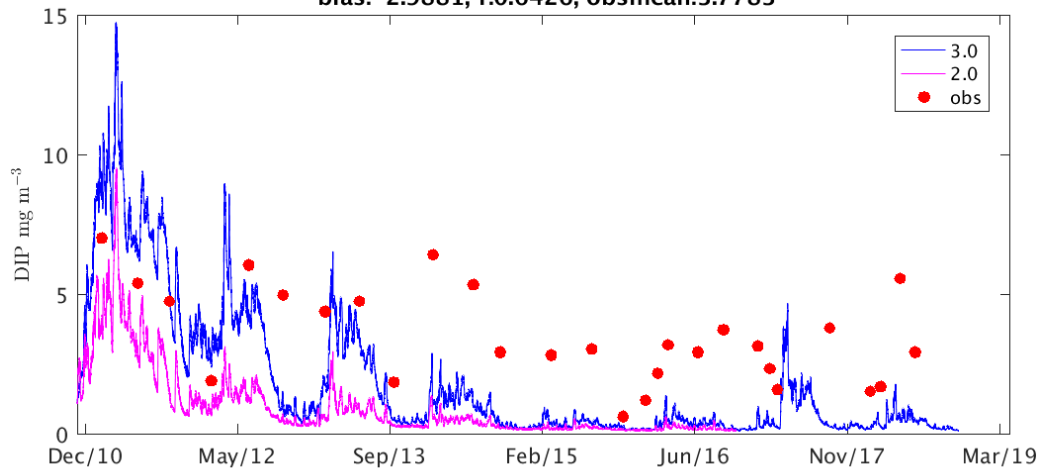

Pine329\_0m 3.0 d2:0.63, mape:71.6, rms:2.6900  
 bias:-1.9750, r:0.6078, obsmean:3.4935  
 Pine329\_0m 2.0 d2:0.48, mape:80.9, rms:3.2962  
 bias:-3.0075, r:0.5815, obsmean:3.7724

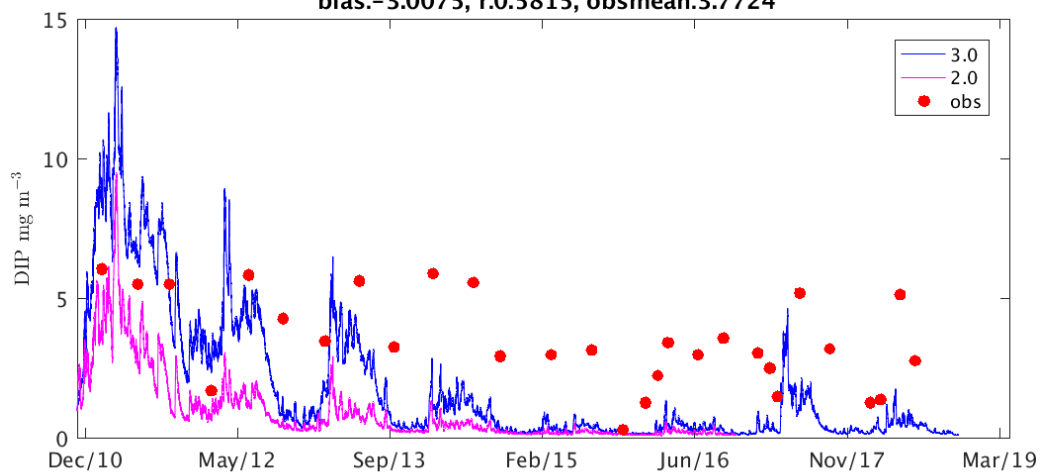

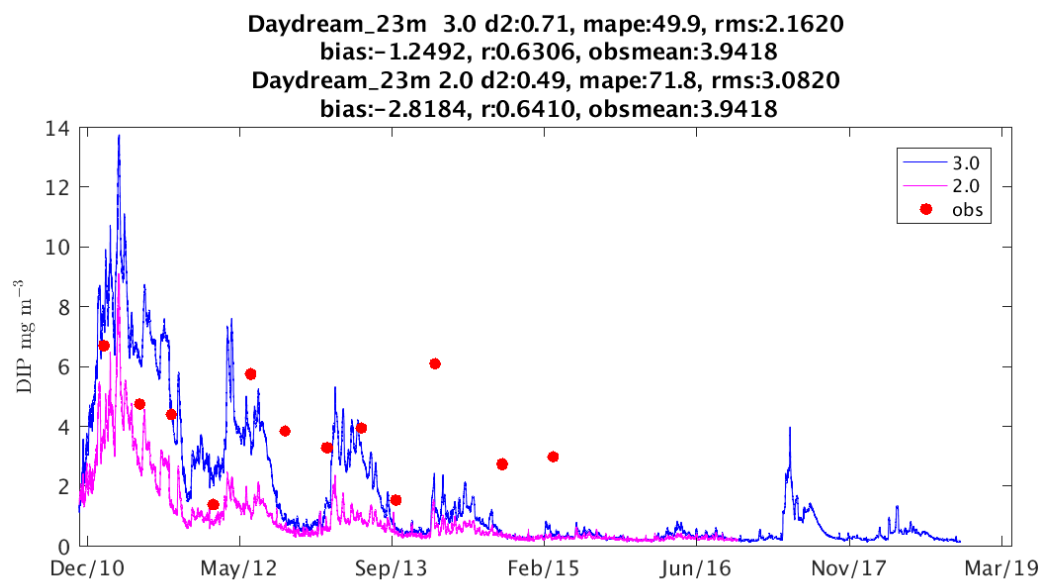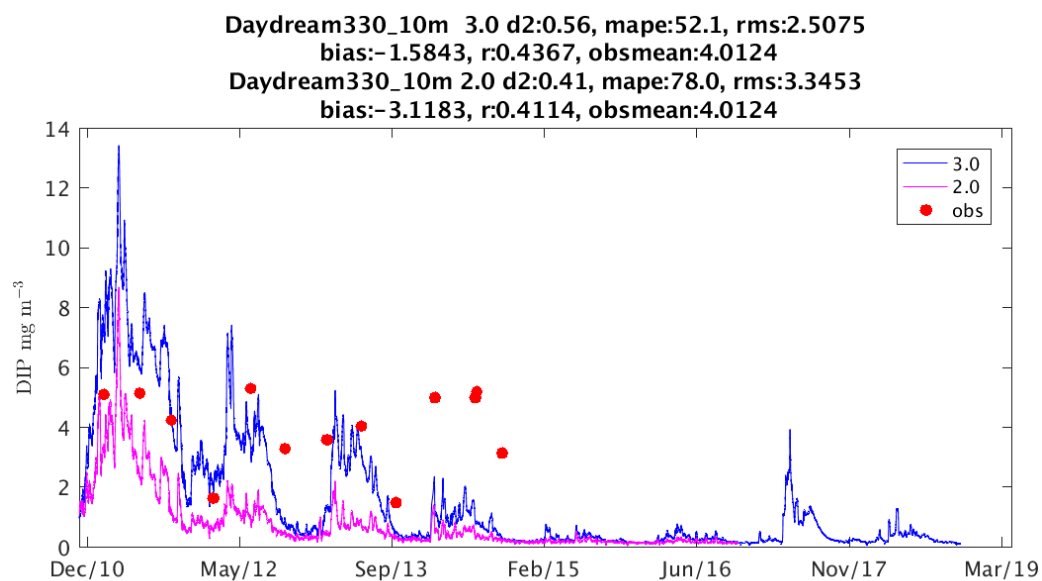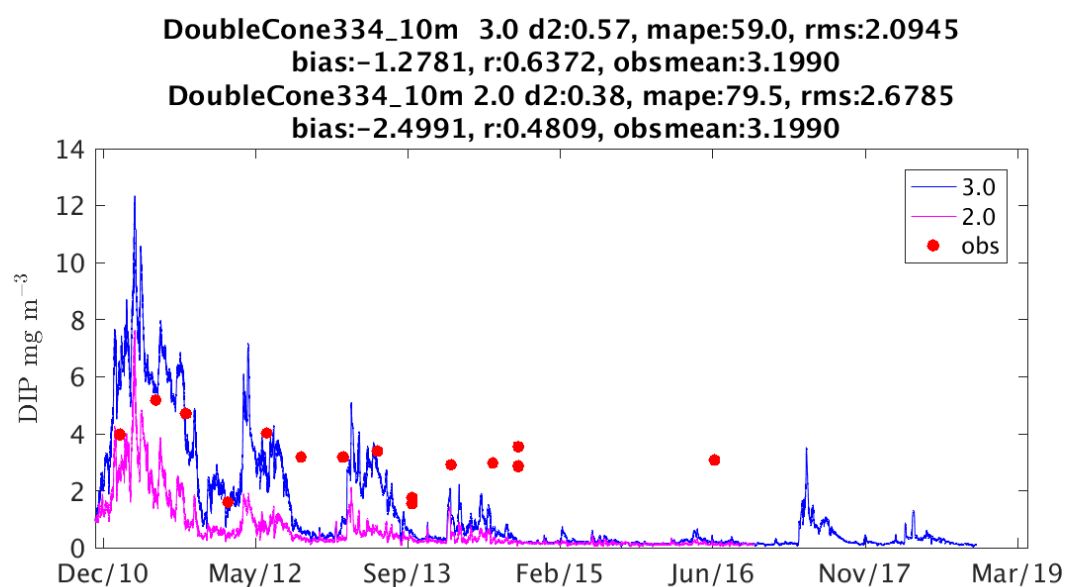

**DoubleCone334\_10m 3.0 d2:0.57, mape:59.0, rms:2.0945**  
**bias:-1.2781, r:0.6372, obsmean:3.1990**  
**DoubleCone334\_10m 2.0 d2:0.38, mape:79.5, rms:2.6785**  
**bias:-2.4991, r:0.4809, obsmean:3.1990**

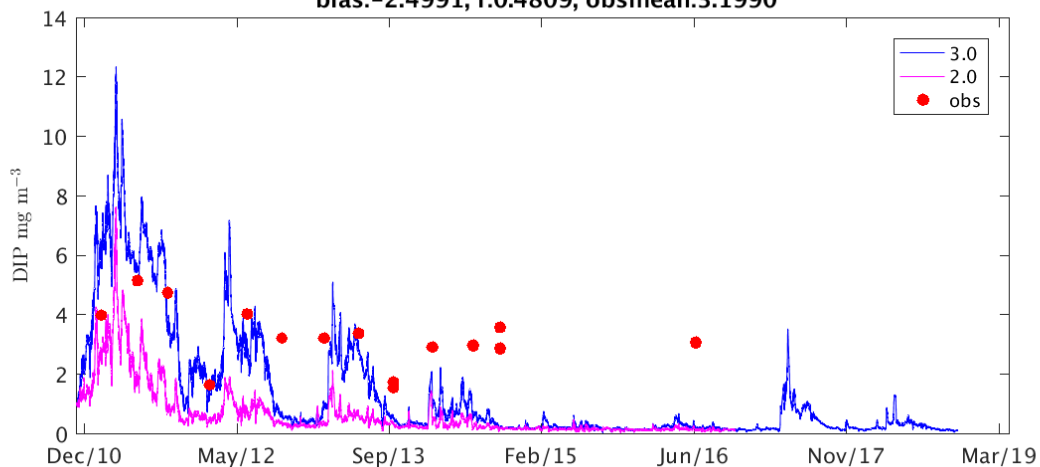

**GeoffreyBay336\_5m 3.0 d2:0.71, mape:51.1, rms:2.0757**  
**bias:-1.2867, r:0.6263, obsmean:3.2645**  
**GeoffreyBay336\_5m 2.0 d2:0.48, mape:81.8, rms:2.9963**  
**bias:-2.7370, r:0.6518, obsmean:3.4186**

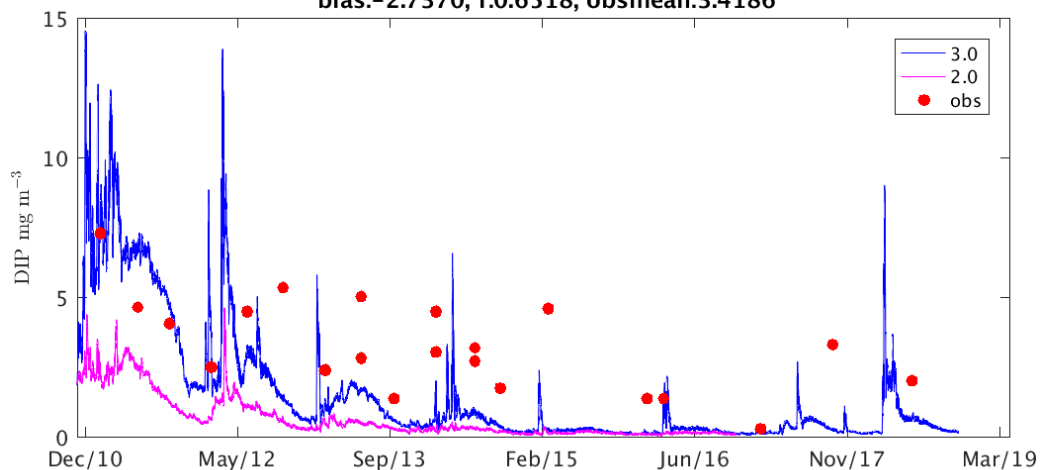

**Pandora\_5m 3.0 d2:0.74, mape:47.5, rms:1.6856**  
**bias:-1.1941, r:0.7463, obsmean:3.3284**  
**Pandora\_5m 2.0 d2:0.49, mape:73.8, rms:2.6102**  
**bias:-2.4281, r:0.8166, obsmean:3.3284**

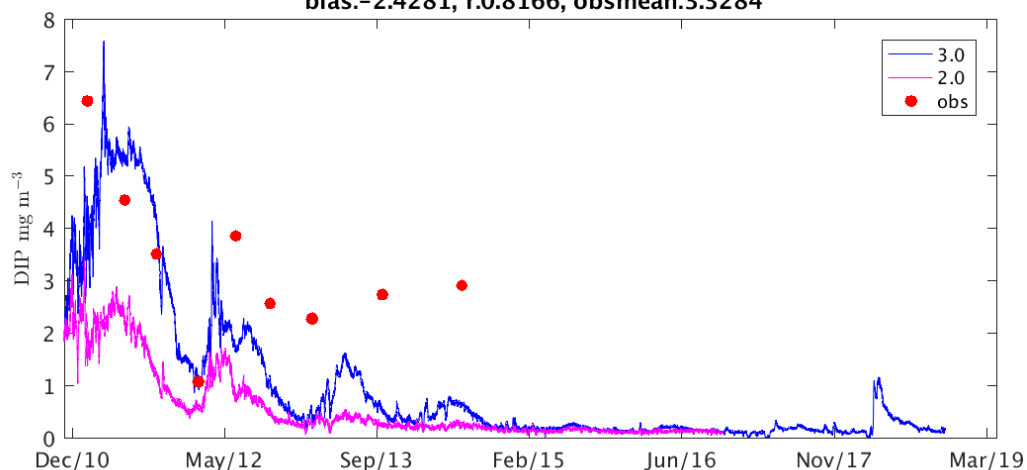

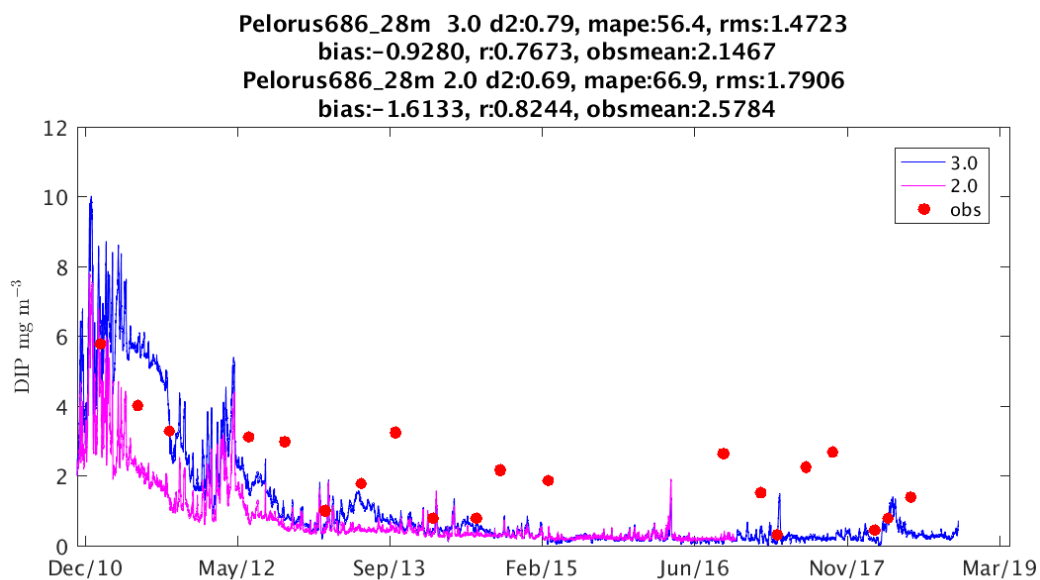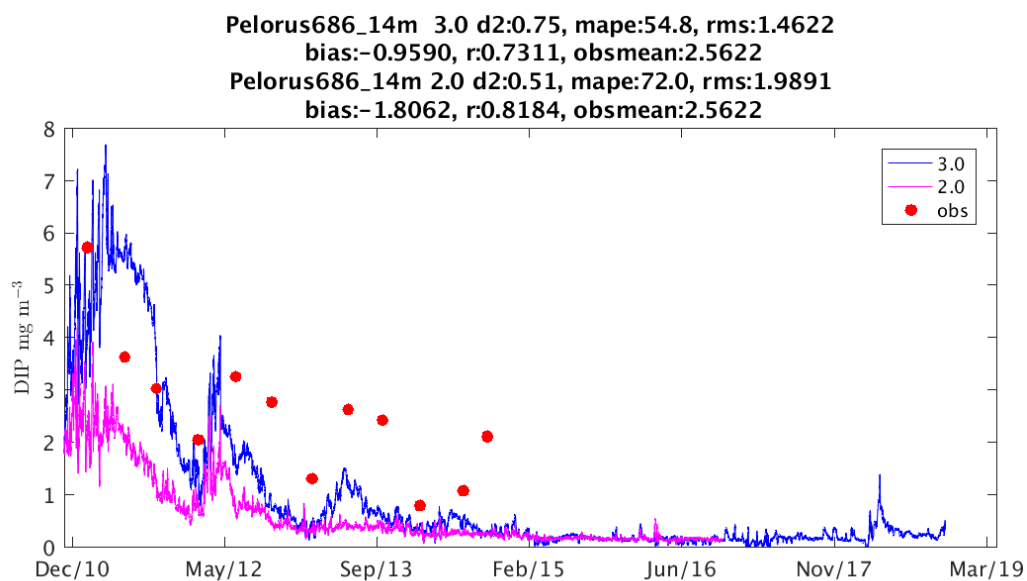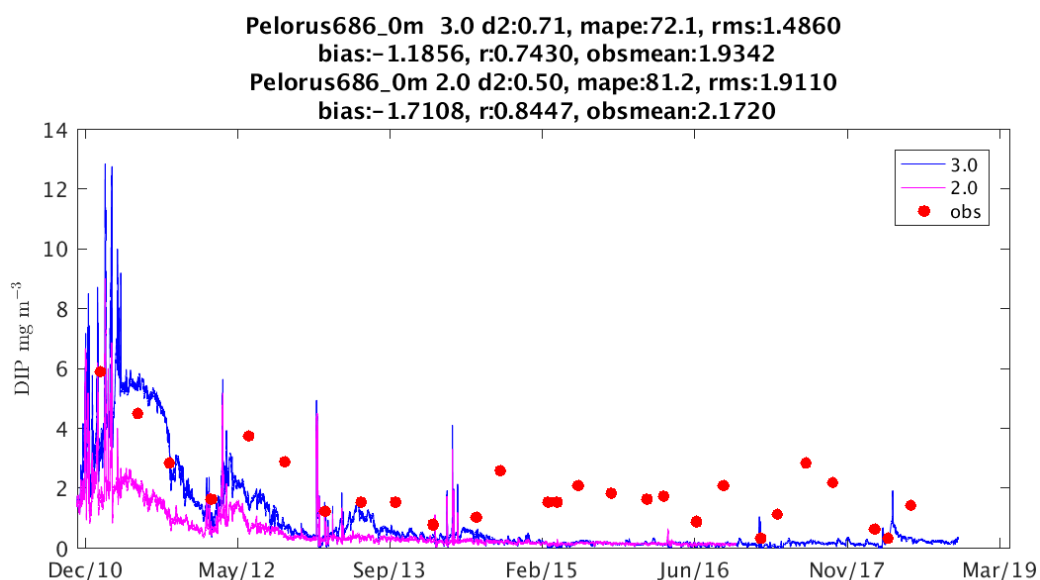

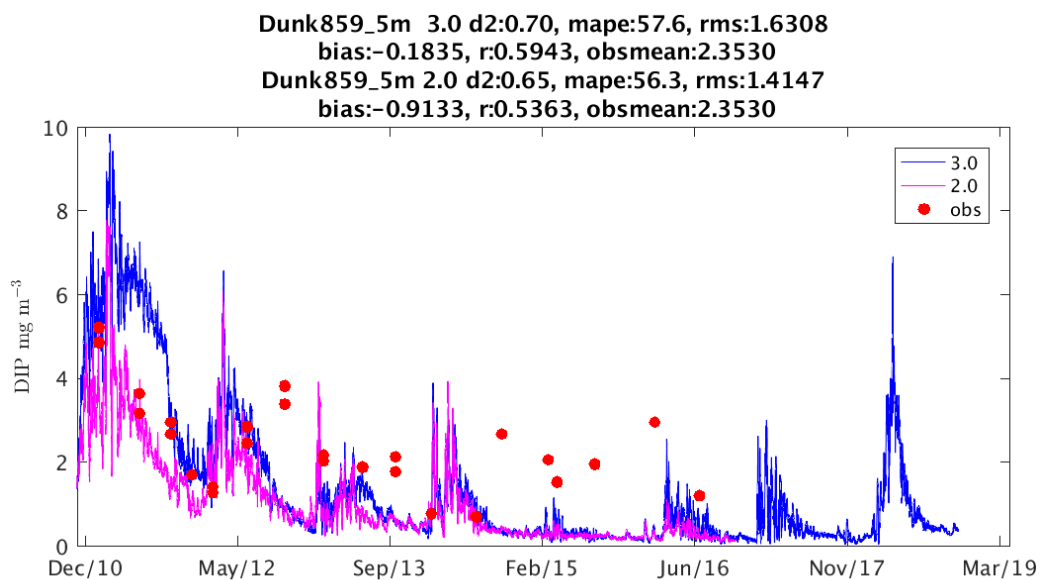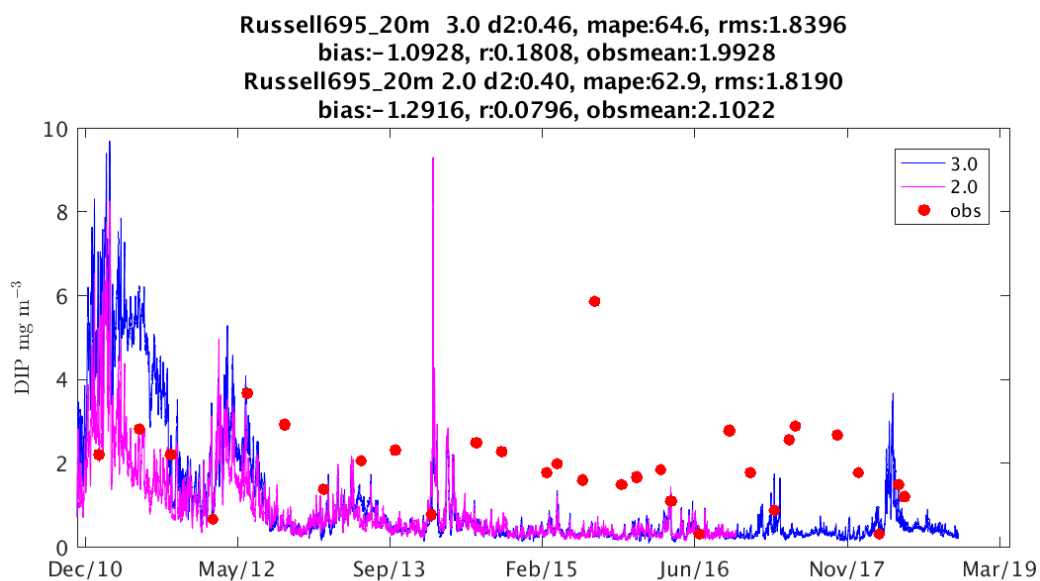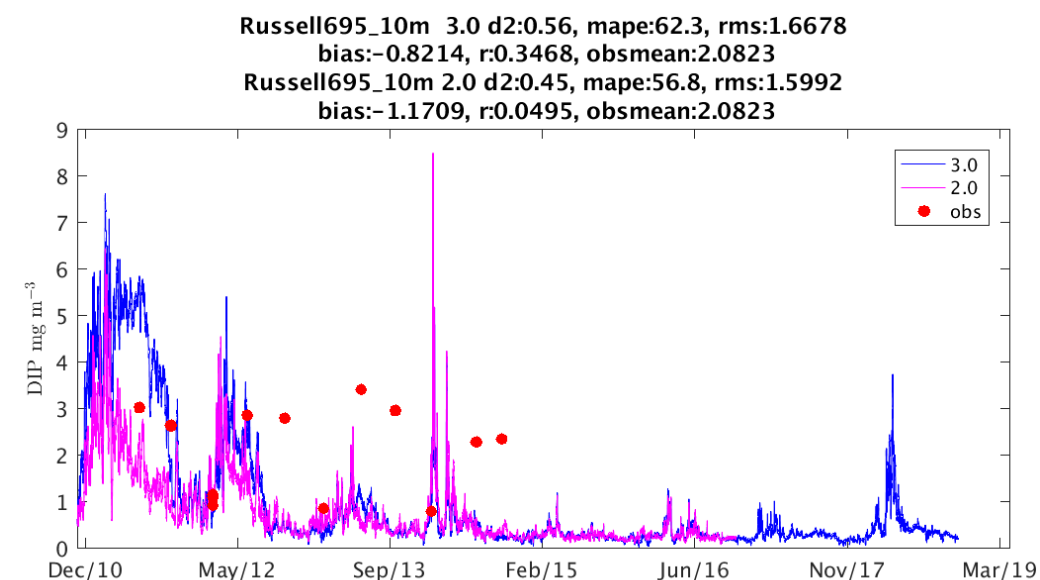

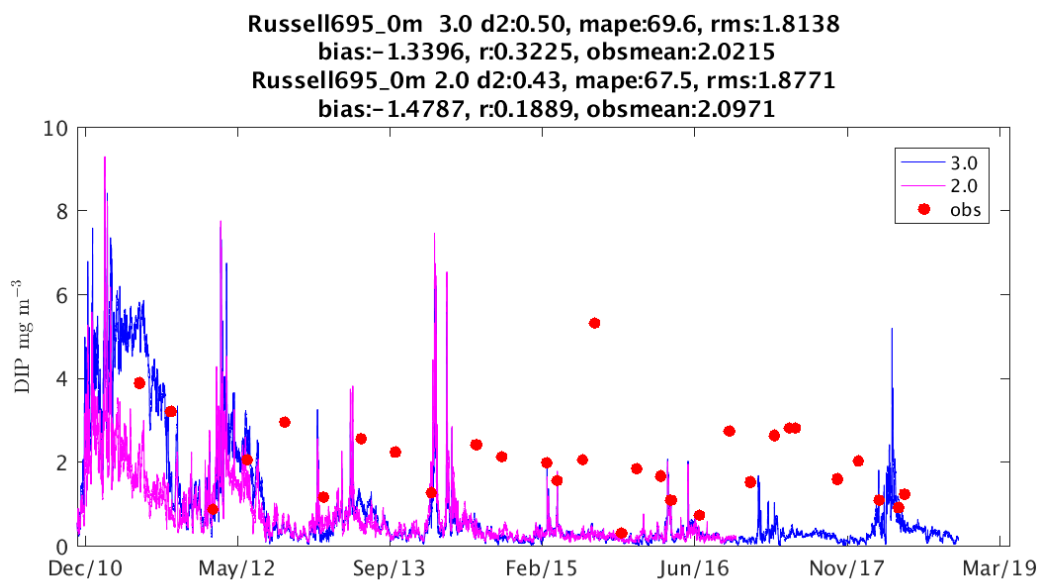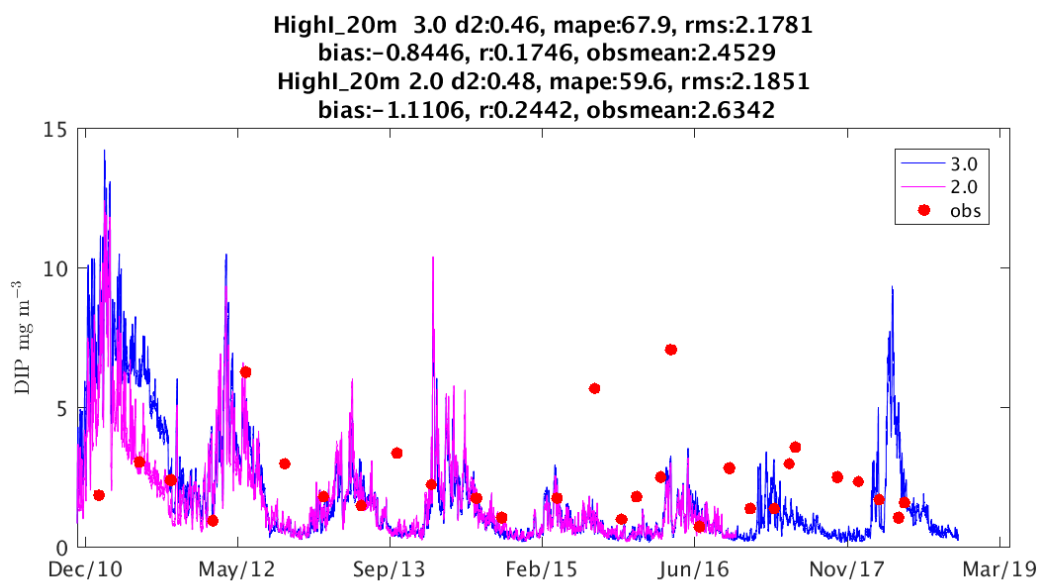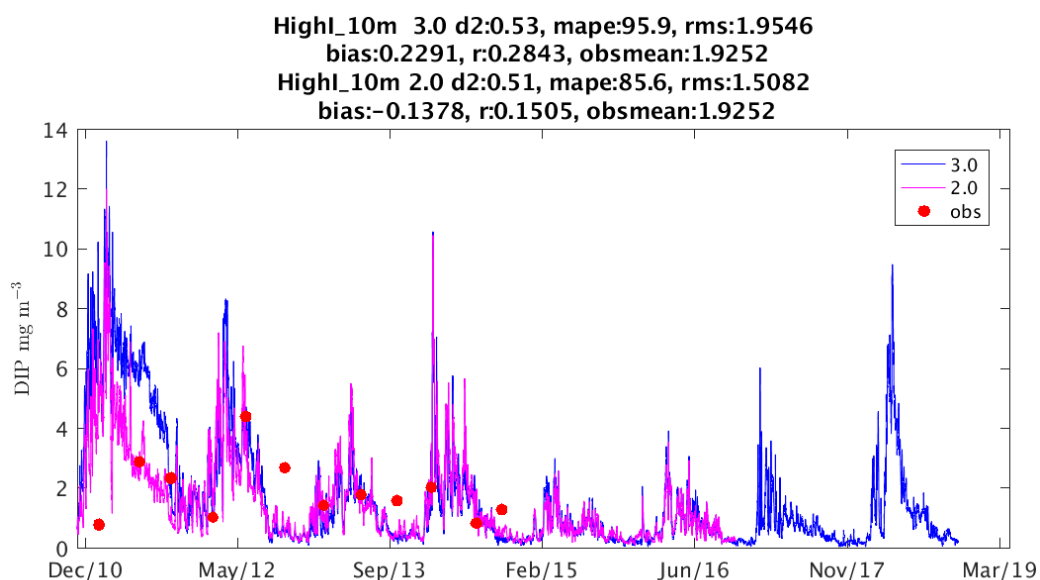

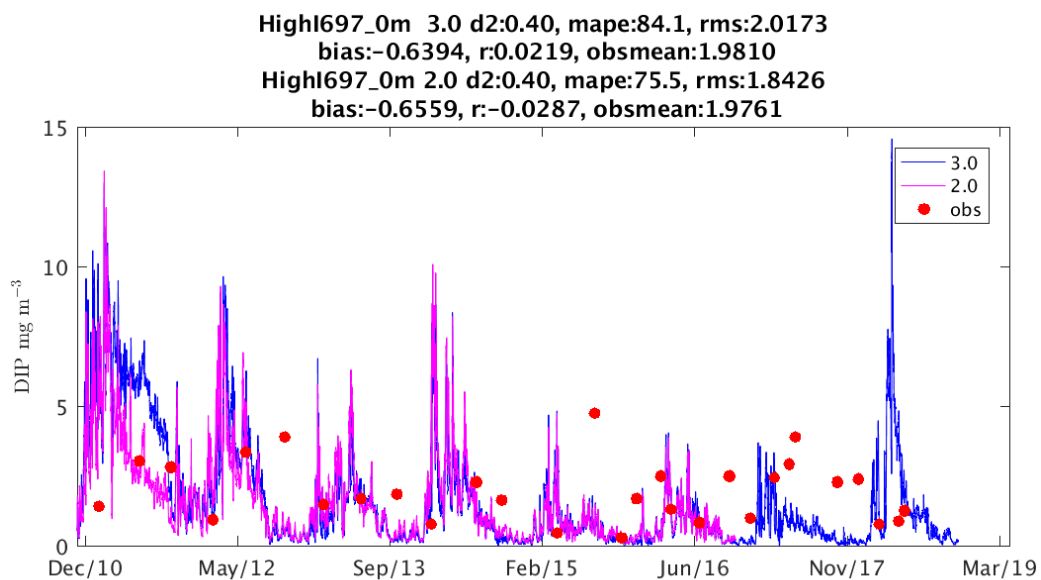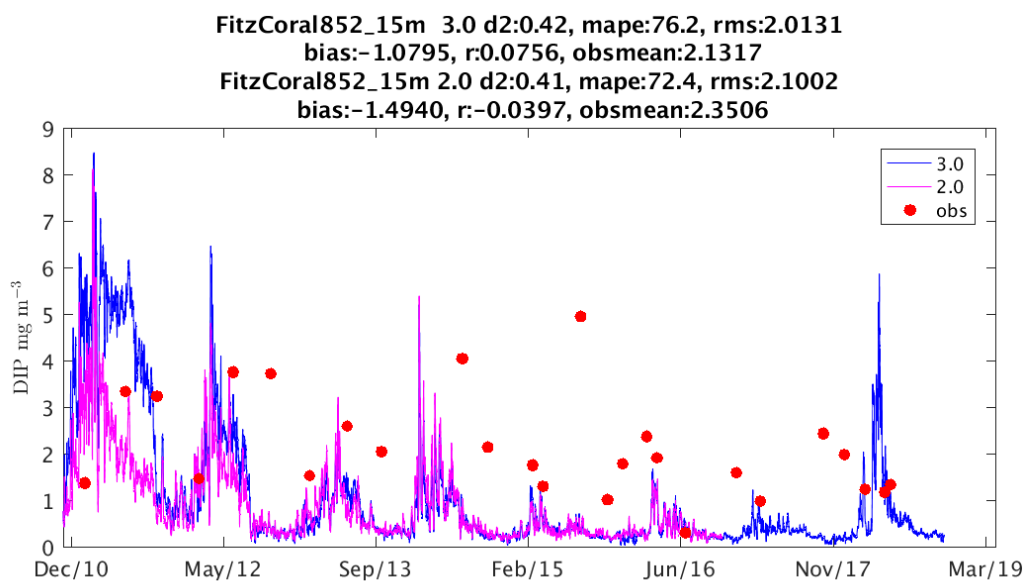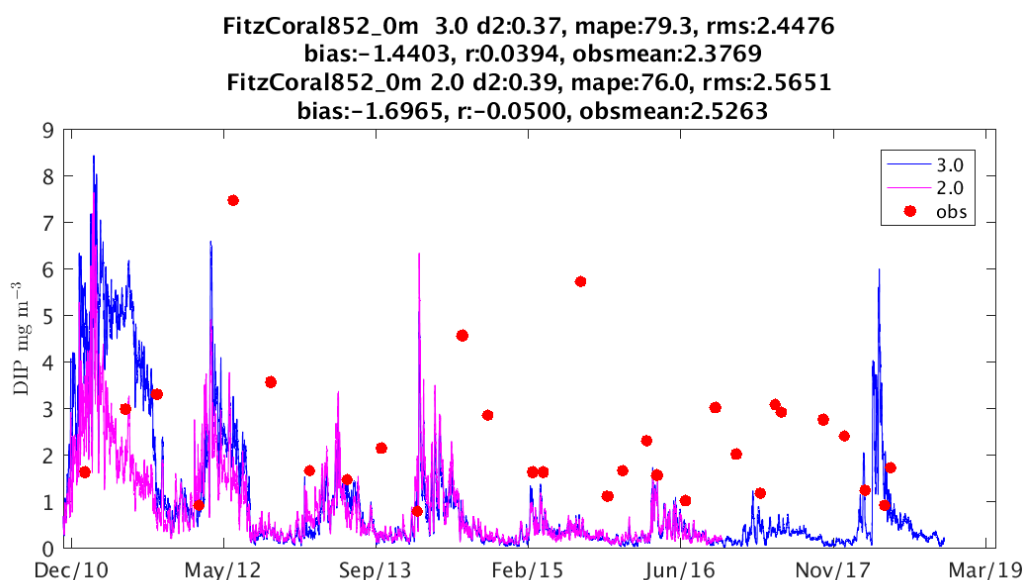



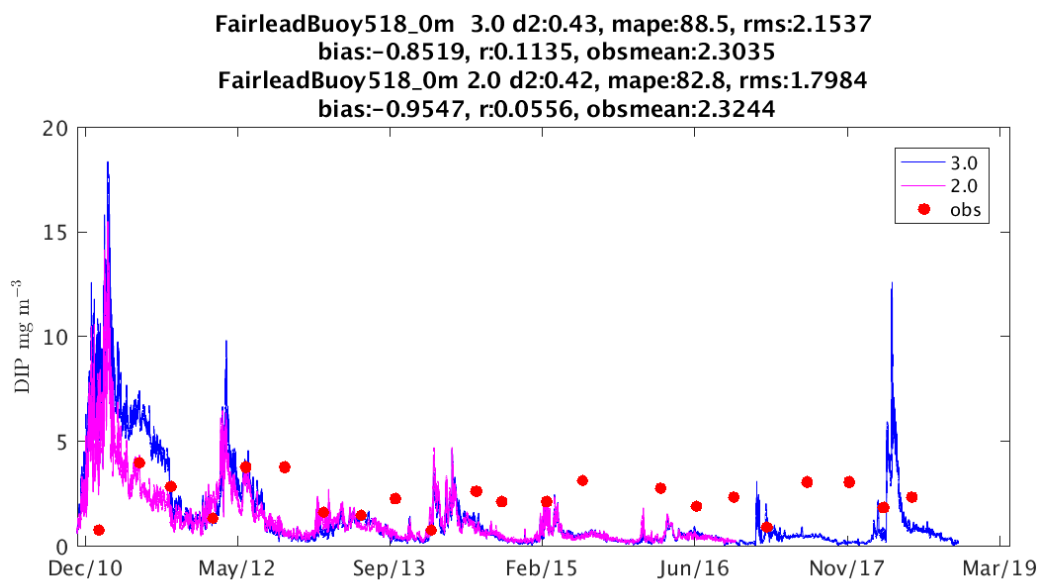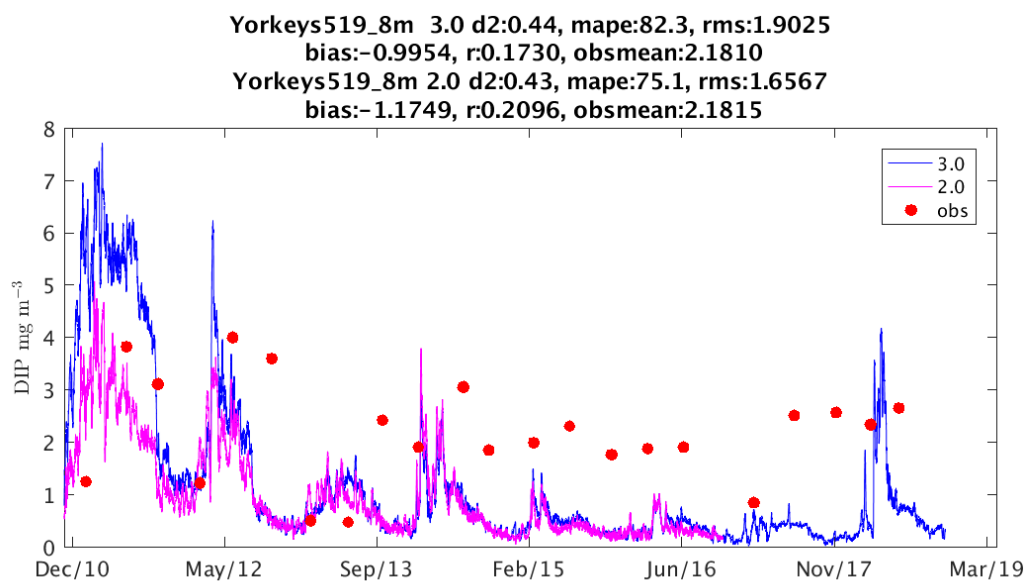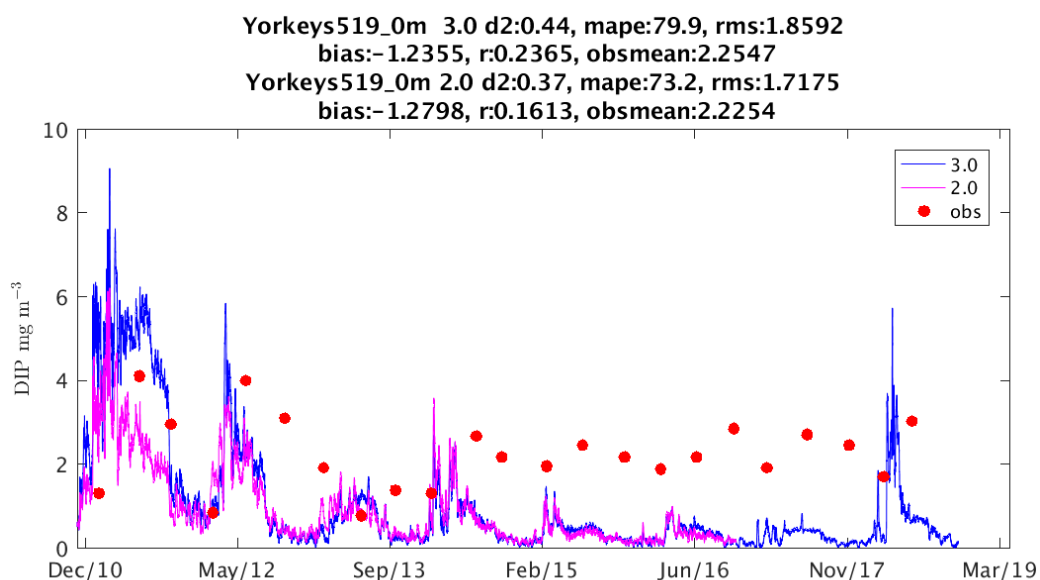

Green830\_36m 3.0 d2:0.56, mape:65.1, rms:1.5962  
 bias:-1.1311, r:0.4758, obsmean:2.1052  
 Green830\_36m 2.0 d2:0.43, mape:69.4, rms:1.6013  
 bias:-1.2741, r:0.2424, obsmean:2.1259

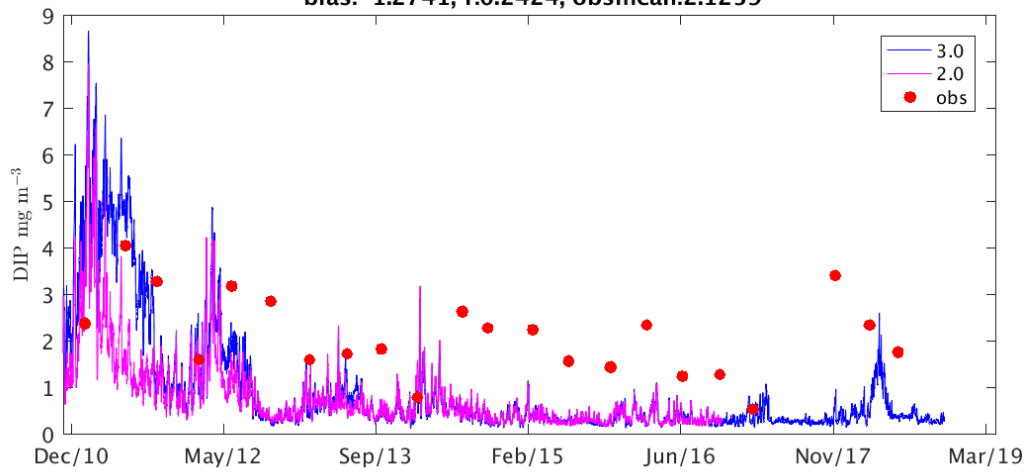

Green830\_18m 3.0 d2:0.53, mape:66.2, rms:1.8024  
 bias:-1.4328, r:0.5535, obsmean:2.5916  
 Green830\_18m 2.0 d2:0.38, mape:68.8, rms:2.0202  
 bias:-1.8288, r:0.1927, obsmean:2.5916

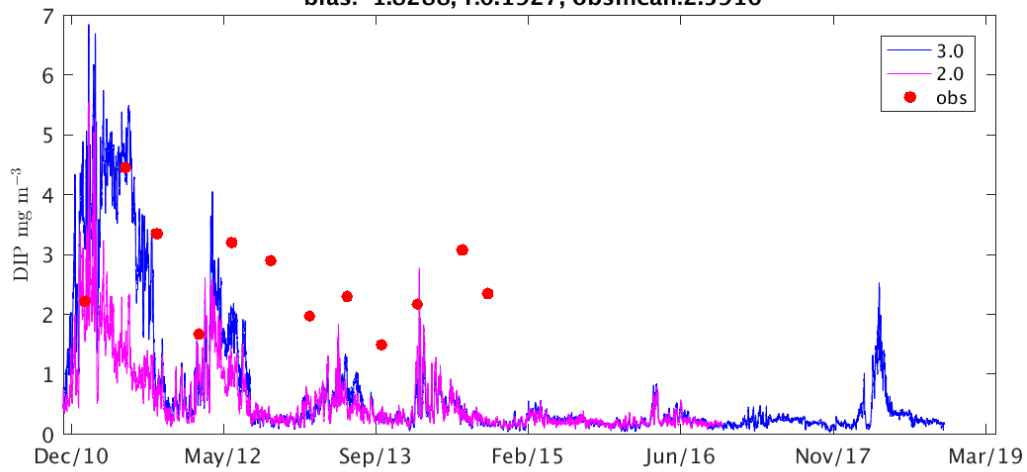

Green830\_0m 3.0 d2:0.48, mape:87.5, rms:1.7146  
 bias:-1.2327, r:0.2975, obsmean:1.9229  
 Green830\_0m 2.0 d2:0.39, mape:81.9, rms:1.8257  
 bias:-1.4617, r:0.0561, obsmean:1.9826

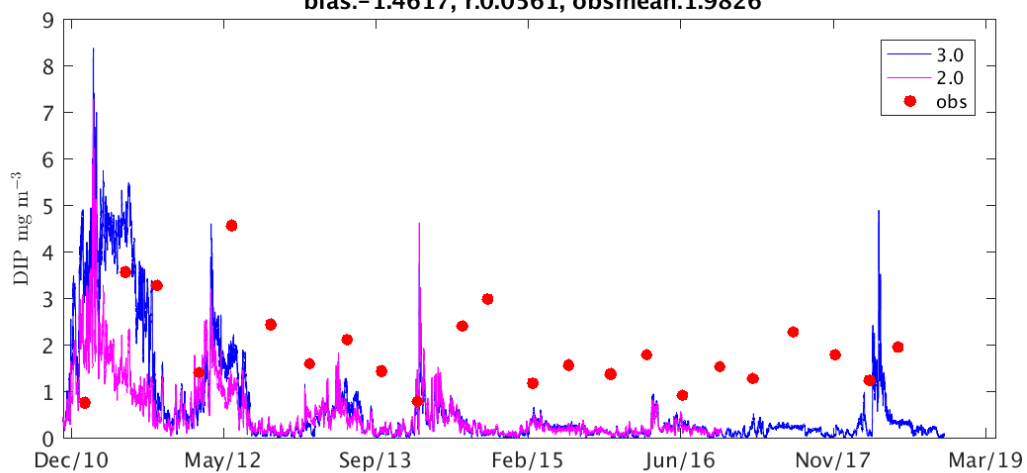

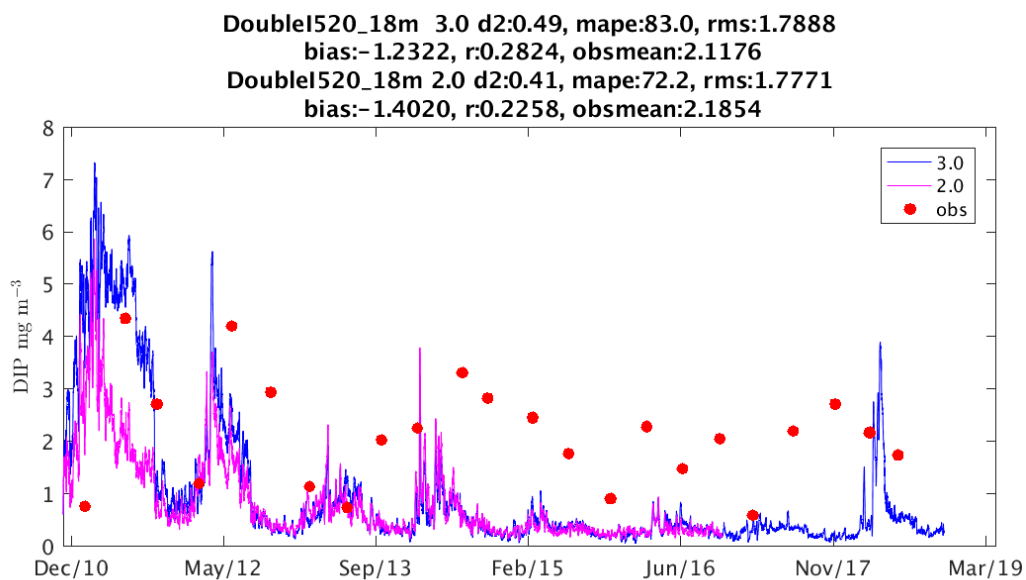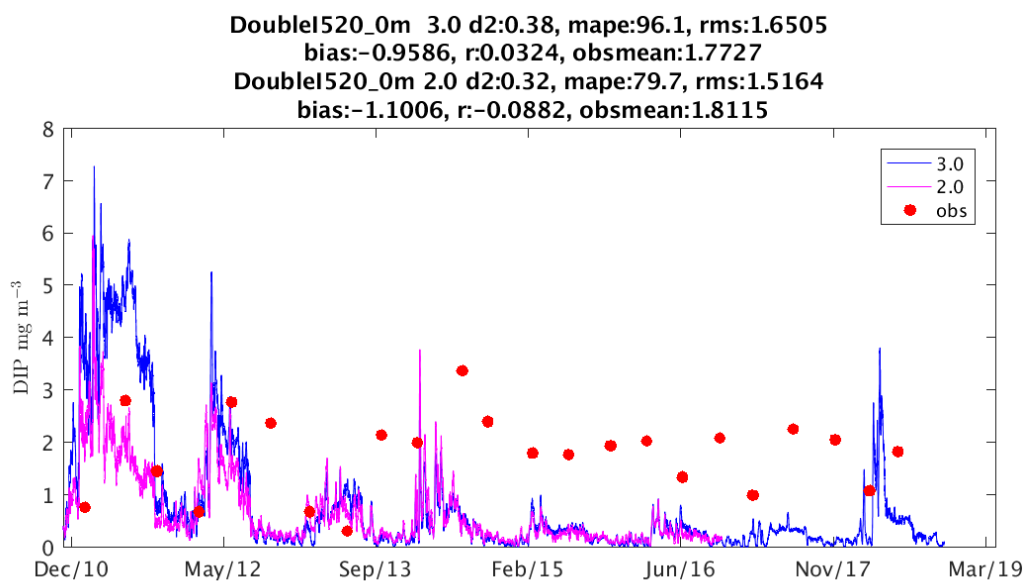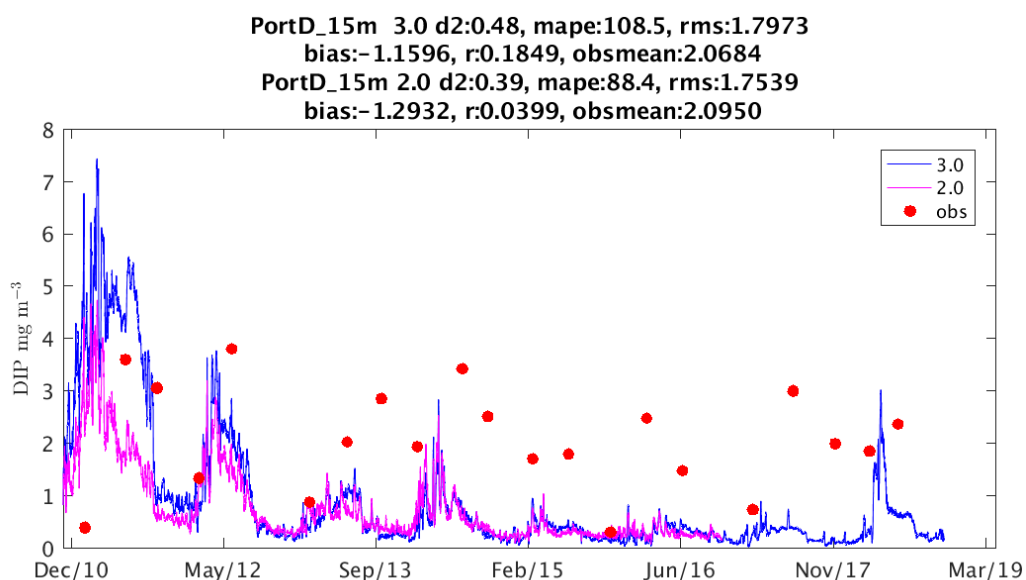

PortD\_0m 3.0 d2:0.41, mape:89.7, rms:2.2945  
 bias:-1.5586, r:0.0518, obsmean:2.3577  
 PortD\_0m 2.0 d2:0.35, mape:80.9, rms:2.4268  
 bias:-1.8210, r:-0.1406, obsmean:2.5101

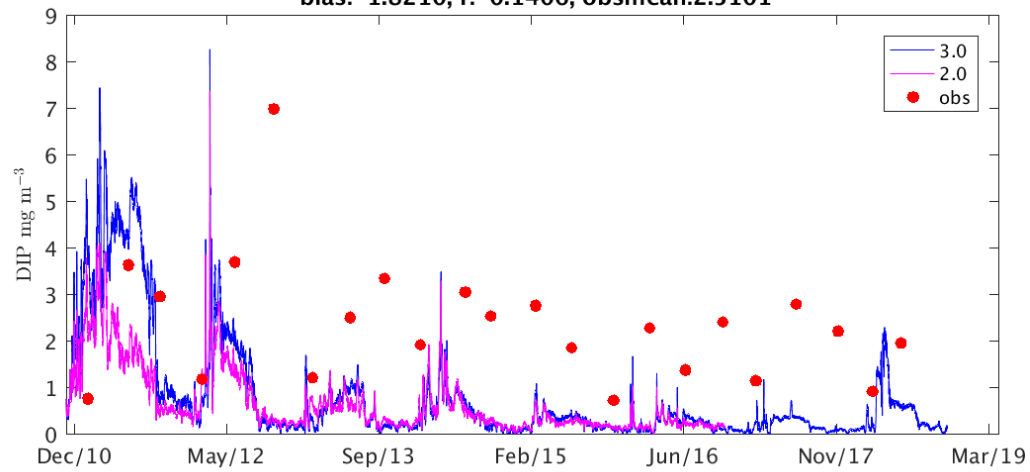

Snap\_10m 3.0 d2:0.37, mape:76.4, rms:2.4100  
 bias:-2.2861, r:0.3779, obsmean:2.9962  
 Snap\_10m 2.0 d2:0.35, mape:78.5, rms:2.4860  
 bias:-2.3750, r:0.3422, obsmean:2.9962

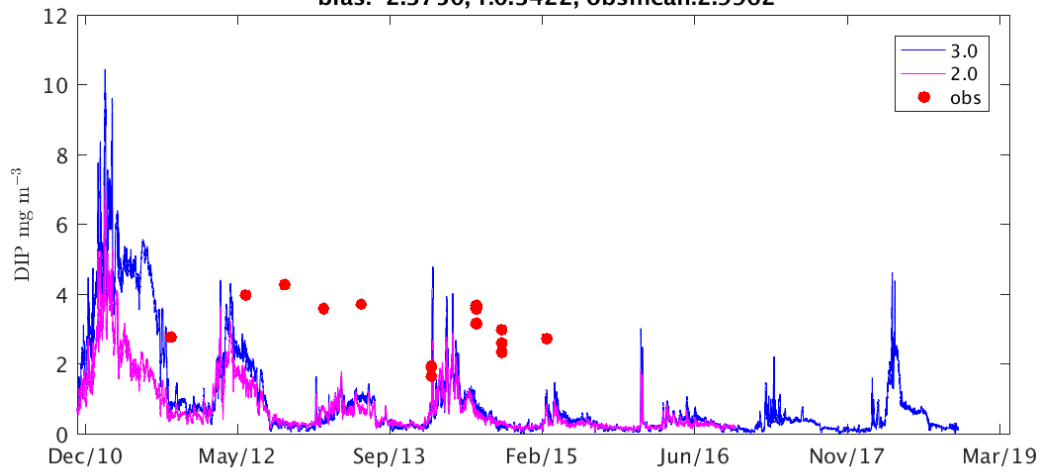

### 13. Simulated NO<sub>x</sub> assessment against AIMS Long Term Monitoring

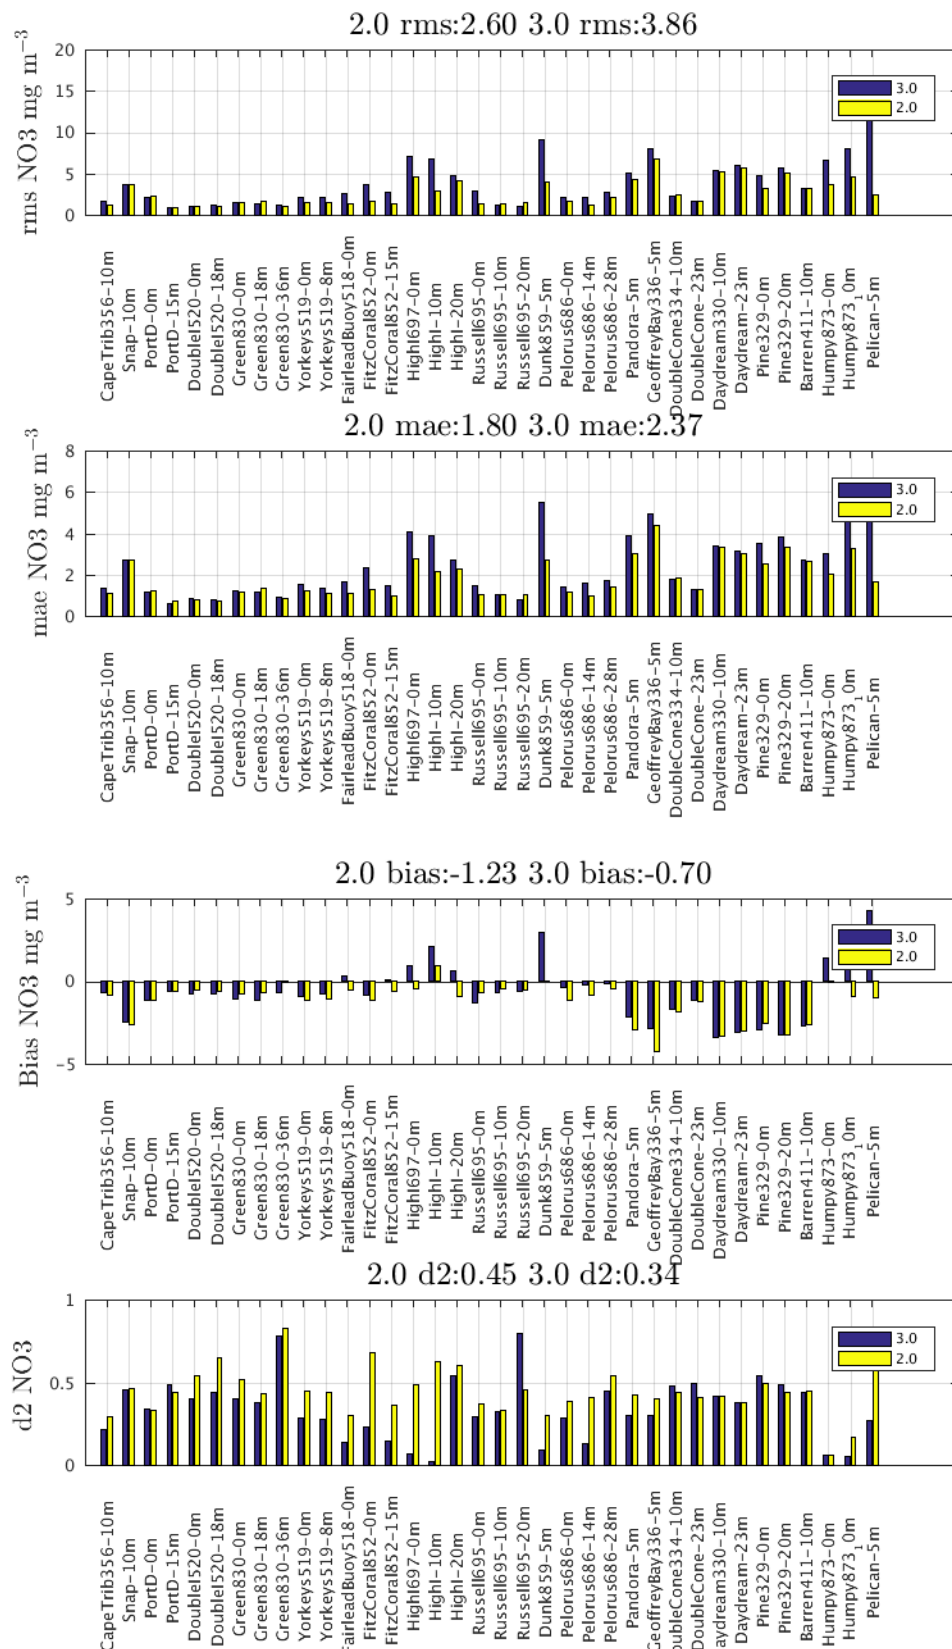

Figure 8 Metrics for Long Term Monitoring sites NO<sub>3</sub> assessment against observations for model version 3p0 and 2p0 d2 = Willmott index see Statistical metric page 27.mae:mean absolute error, rms root mean square

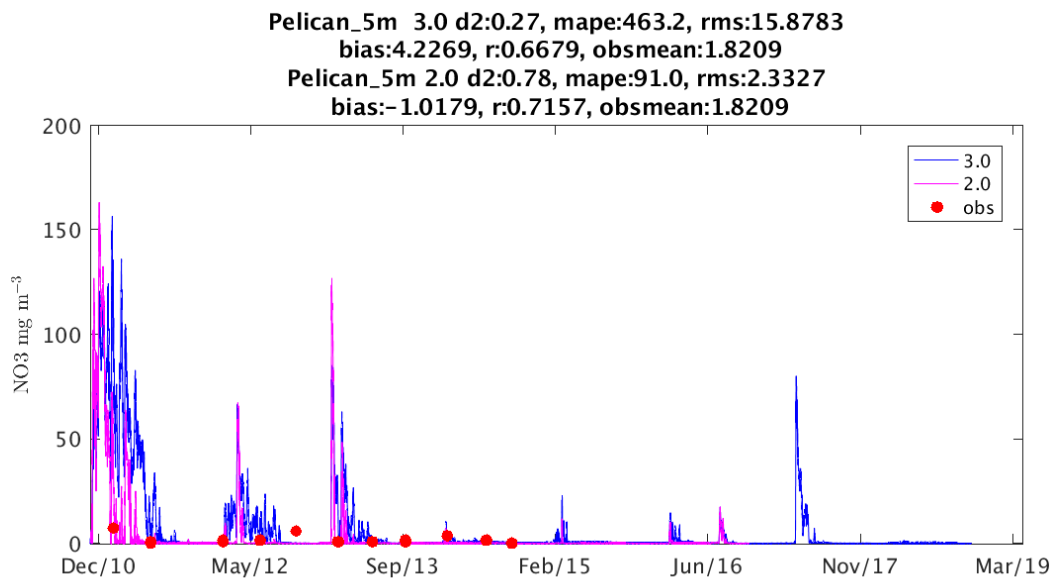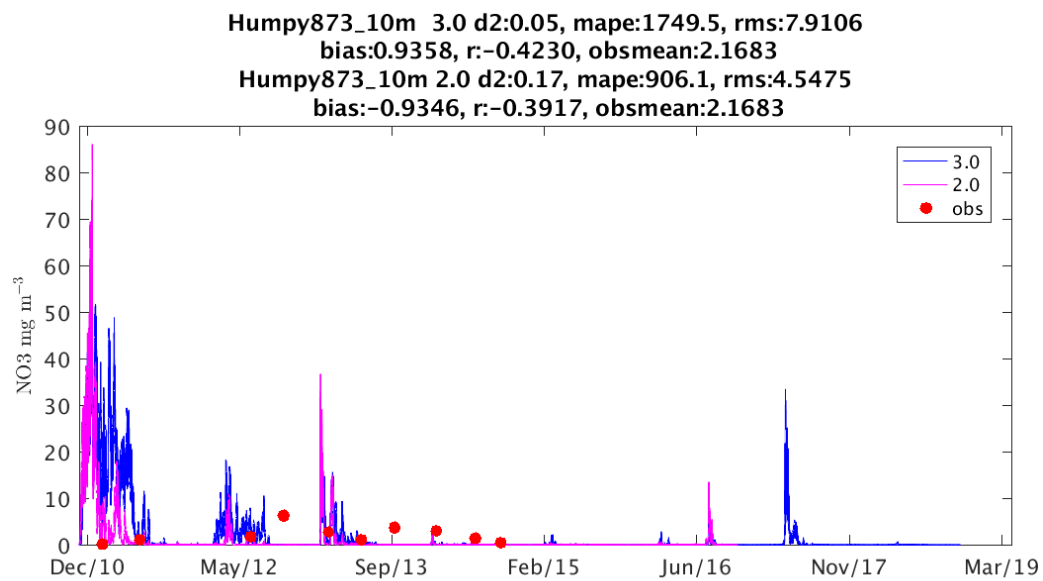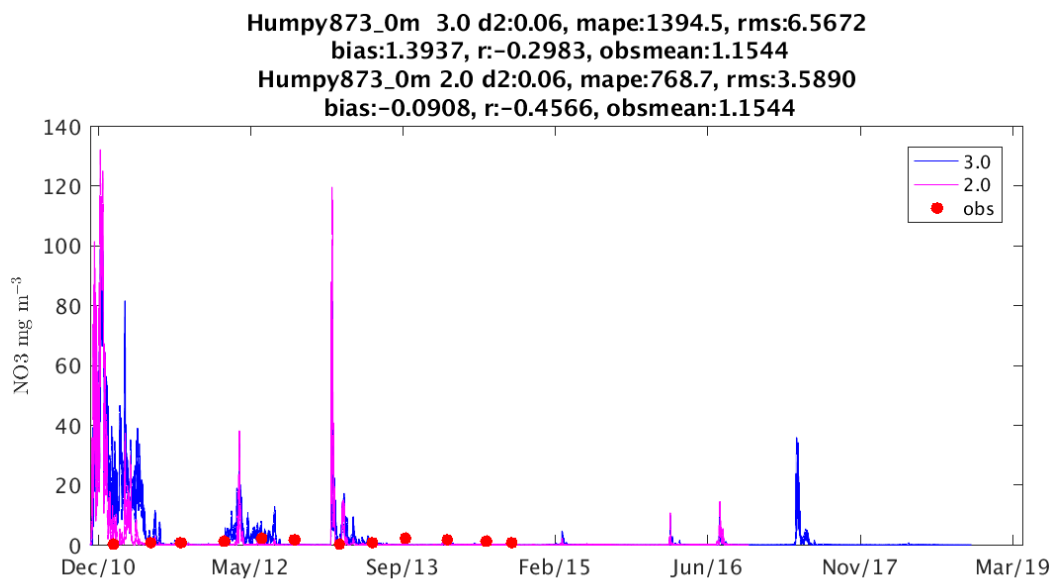

Barren411\_10m 3.0 d2:0.44, mape:96.7, rms:3.2380  
 bias:-2.6796, r:0.5995, obsmean:2.7836  
 Barren411\_10m 2.0 d2:0.45, mape:94.2, rms:3.1538  
 bias:-2.6084, r:0.5675, obsmean:2.7836

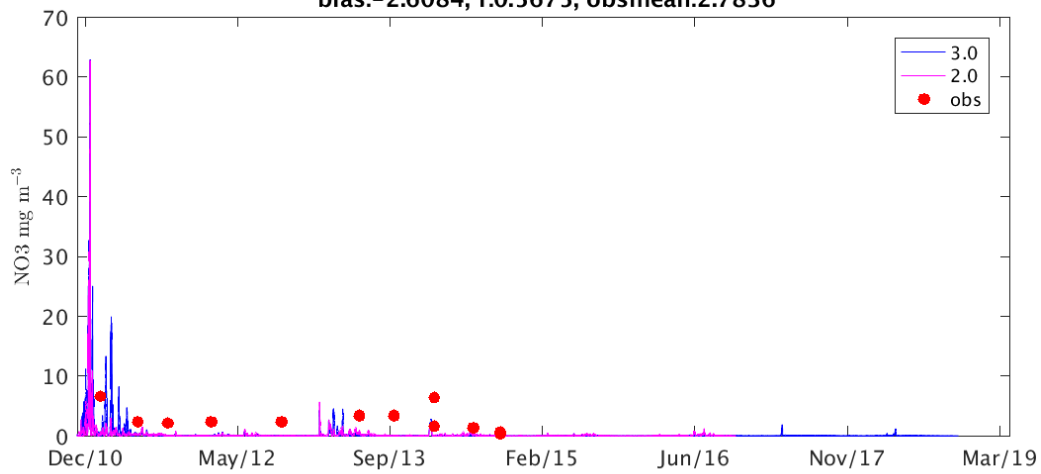

Pine329\_20m 3.0 d2:0.49, mape:87.2, rms:5.6015  
 bias:-3.2316, r:0.2042, obsmean:4.1014  
 Pine329\_20m 2.0 d2:0.44, mape:85.1, rms:5.0701  
 bias:-3.2891, r:0.6814, obsmean:3.7297

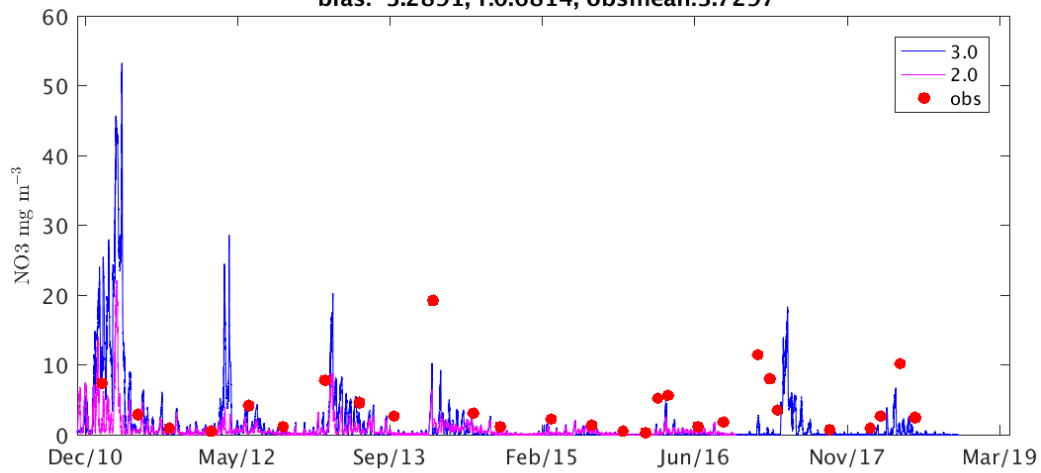

Pine329\_0m 3.0 d2:0.54, mape:91.2, rms:4.7214  
 bias:-2.9330, r:0.3001, obsmean:3.7608  
 Pine329\_0m 2.0 d2:0.49, mape:78.8, rms:3.2404  
 bias:-2.5354, r:0.4036, obsmean:2.9982

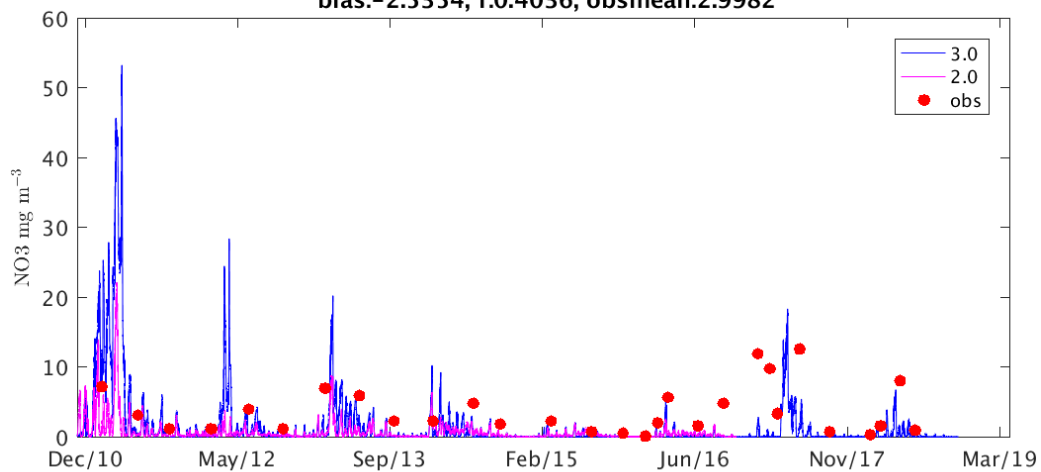

Daydream\_23m 3.0 d2:0.38, mape:70.0, rms:5.9701  
 bias:-3.1180, r:-0.0331, obsmean:3.7987  
 Daydream\_23m 2.0 d2:0.38, mape:56.5, rms:5.7215  
 bias:-3.0172, r:0.5135, obsmean:3.7987

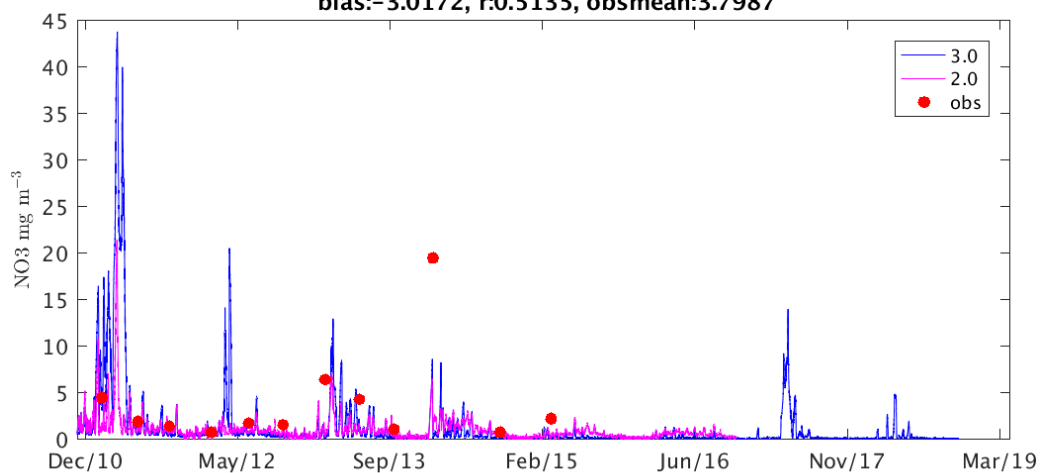

Daydream330\_10m 3.0 d2:0.41, mape:88.8, rms:5.3704  
 bias:-3.3853, r:0.0920, obsmean:3.7434  
 Daydream330\_10m 2.0 d2:0.41, mape:83.4, rms:5.2331  
 bias:-3.3416, r:0.7824, obsmean:3.7434

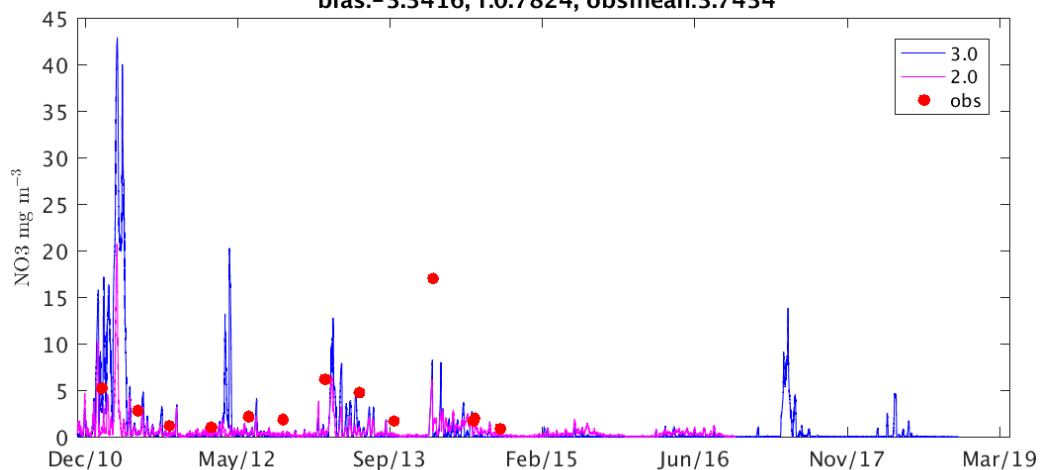

DoubleCone\_23m 3.0 d2:0.49, mape:78.3, rms:1.6977  
 bias:-1.1957, r:0.2328, obsmean:1.5676  
 DoubleCone\_23m 2.0 d2:0.41, mape:76.9, rms:1.6603  
 bias:-1.2709, r:0.0638, obsmean:1.5635

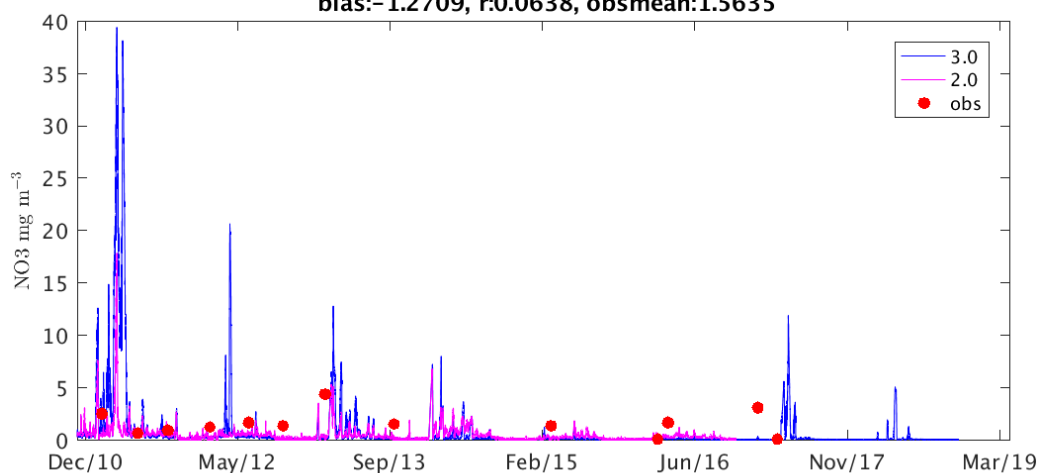



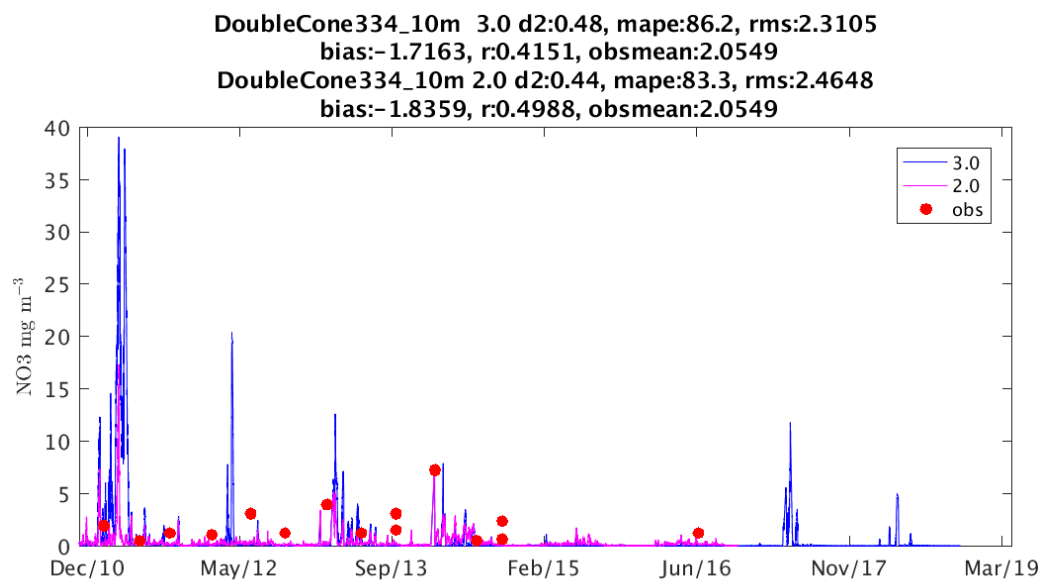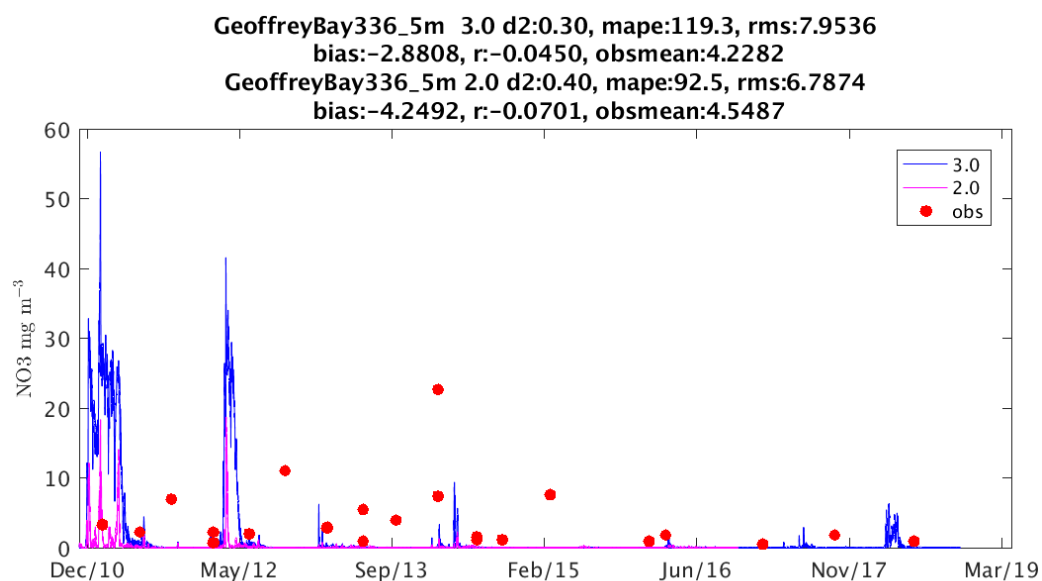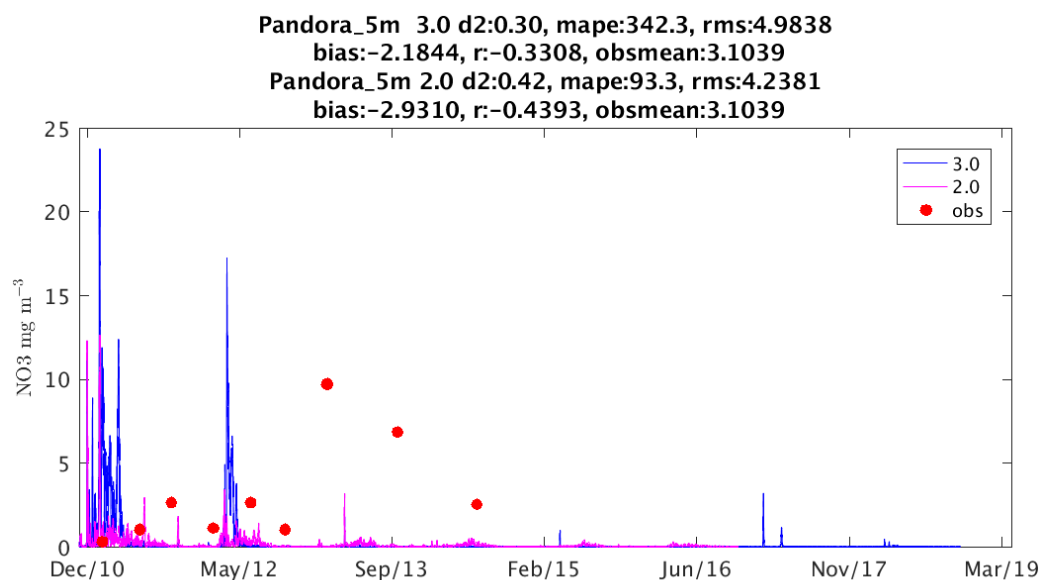

**Pelorus686\_28m 3.0 d2:0.45, mape:199.3, rms:2.7353**  
**bias:-0.1555, r:0.3491, obsmean:1.3843**  
**Pelorus686\_28m 2.0 d2:0.54, mape:72.8, rms:2.1121**  
**bias:-0.4446, r:0.6411, obsmean:1.6470**

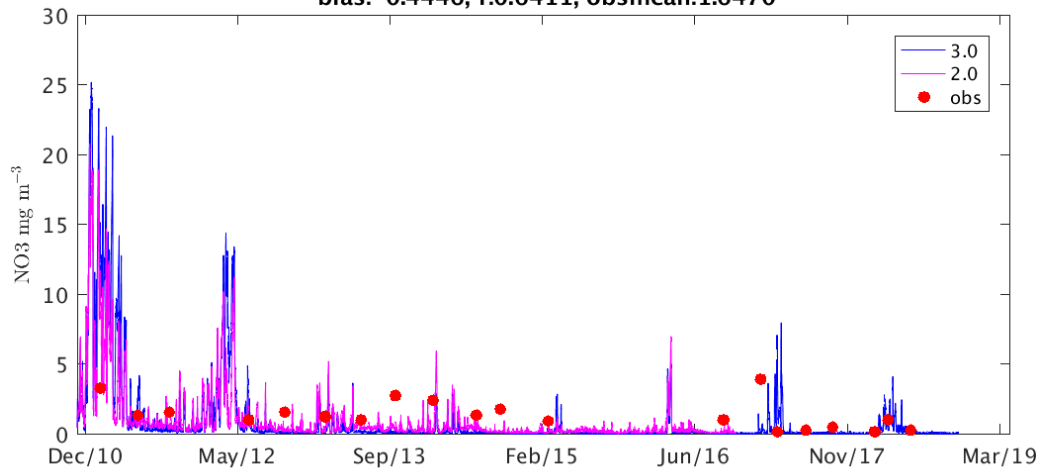

**Pelorus686\_14m 3.0 d2:0.12, mape:384.5, rms:2.1355**  
**bias:-0.2636, r:-0.5484, obsmean:1.2138**  
**Pelorus686\_14m 2.0 d2:0.41, mape:84.2, rms:1.1510**  
**bias:-0.8703, r:-0.2183, obsmean:1.2138**

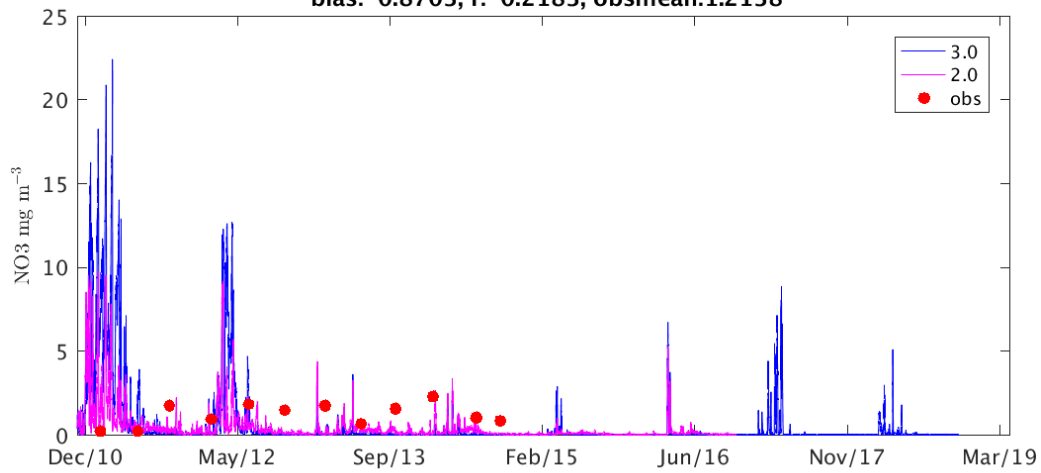

**Pelorus686\_0m 3.0 d2:0.28, mape:136.0, rms:2.0423**  
**bias:-0.3503, r:-0.0325, obsmean:1.1362**  
**Pelorus686\_0m 2.0 d2:0.38, mape:80.0, rms:1.5936**  
**bias:-1.1607, r:-0.2143, obsmean:1.3218**

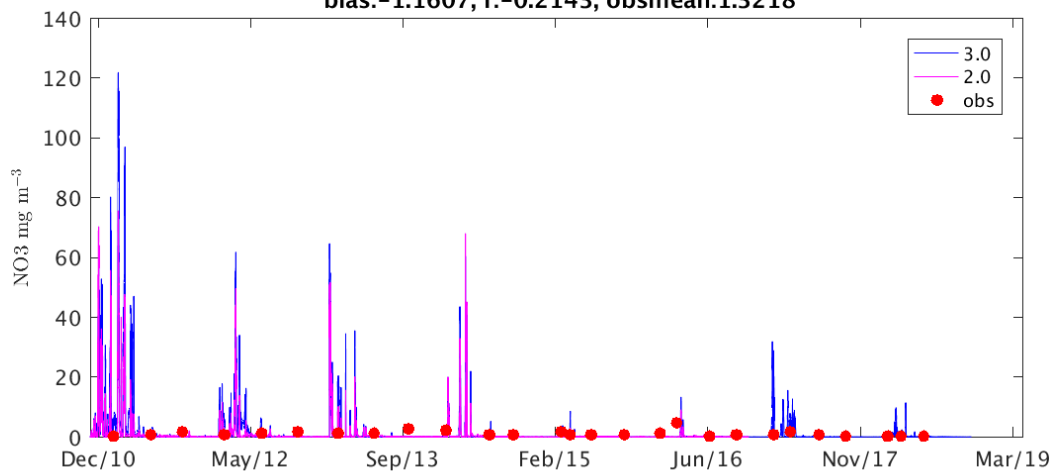

Dunk859\_5m 3.0 d2:0.09, mape:513.9, rms:9.0890  
 bias:2.9842, r:-0.1698, obsmean:2.3160  
 Dunk859\_5m 2.0 d2:0.30, mape:198.9, rms:3.9263  
 bias:-0.0223, r:-0.0643, obsmean:2.3160

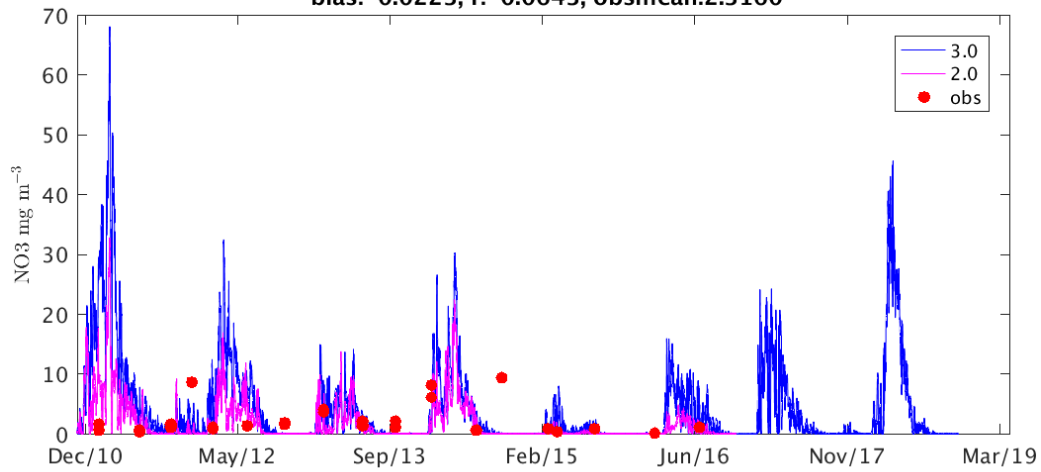

Russell695\_20m 3.0 d2:0.80, mape:90.9, rms:1.0418  
 bias:-0.5843, r:0.7304, obsmean:1.0395  
 Russell695\_20m 2.0 d2:0.45, mape:118.0, rms:1.5485  
 bias:-0.5405, r:0.2552, obsmean:1.1335

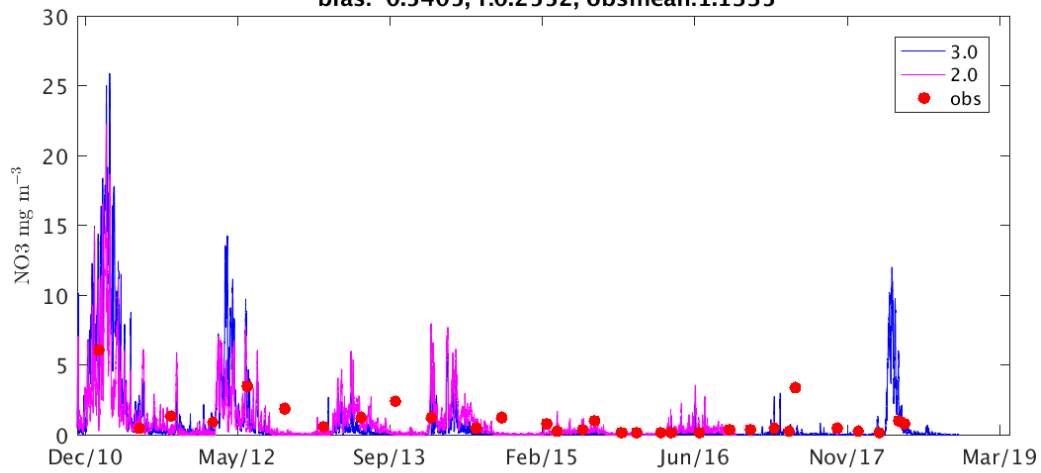

Russell695\_10m 3.0 d2:0.32, mape:134.6, rms:1.1518  
 bias:-0.6778, r:-0.1952, obsmean:1.0413  
 Russell695\_10m 2.0 d2:0.33, mape:97.1, rms:1.3502  
 bias:-0.4942, r:0.0698, obsmean:1.0413

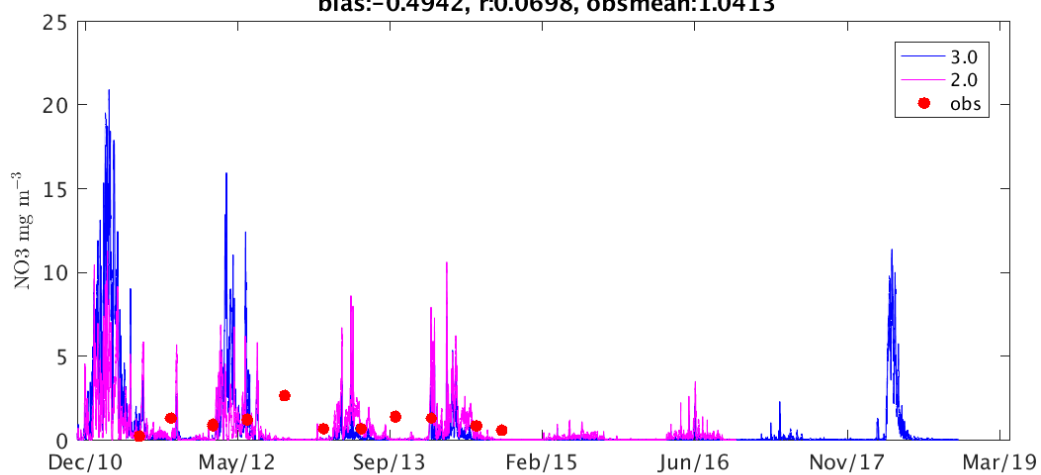

**Highl\_10m 3.0 d2:0.02, mape:1080.1, rms:6.7554**

**bias:2.0861, r:-0.2585, obsmean:1.4049**

**Highl\_10m 2.0 d2:0.62, mape:475.3, rms:2.8124**

**bias:0.9520, r:0.4651, obsmean:1.4049**

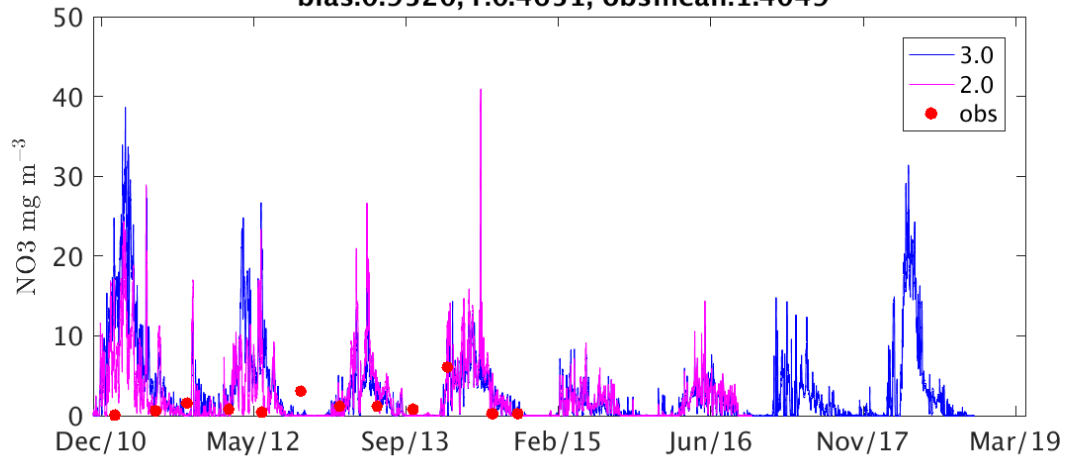

**Highl\_20m 3.0 d2:0.54, mape:330.6, rms:4.7201**

**bias:0.6523, r:0.3286, obsmean:2.1869**

**Highl\_20m 2.0 d2:0.60, mape:211.4, rms:4.1357**

**bias:-0.9513, r:0.5305, obsmean:2.8763**

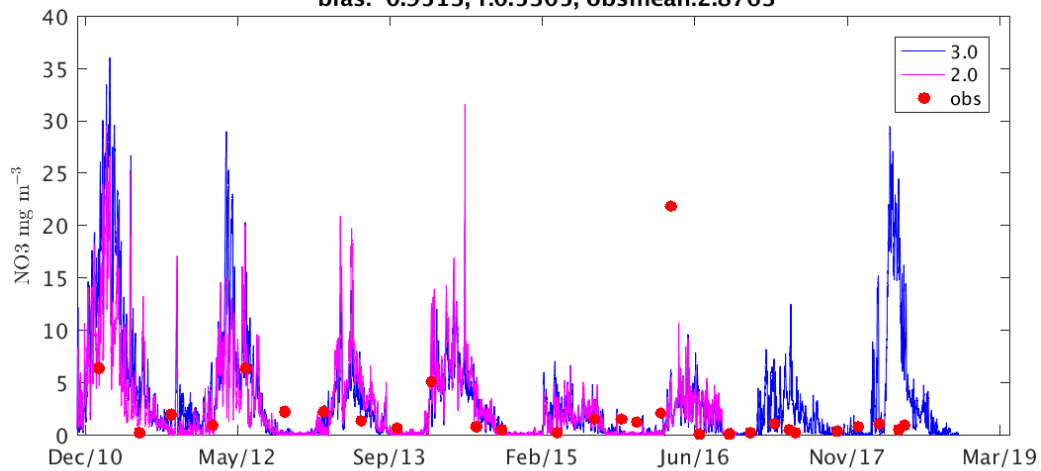

**Highl697\_0m 3.0 d2:0.07, mape:767.3, rms:6.9776**

**bias:0.9008, r:-0.1369, obsmean:1.9928**

**Highl697\_0m 2.0 d2:0.49, mape:379.6, rms:4.5492**

**bias:-0.4487, r:0.2515, obsmean:2.3859**

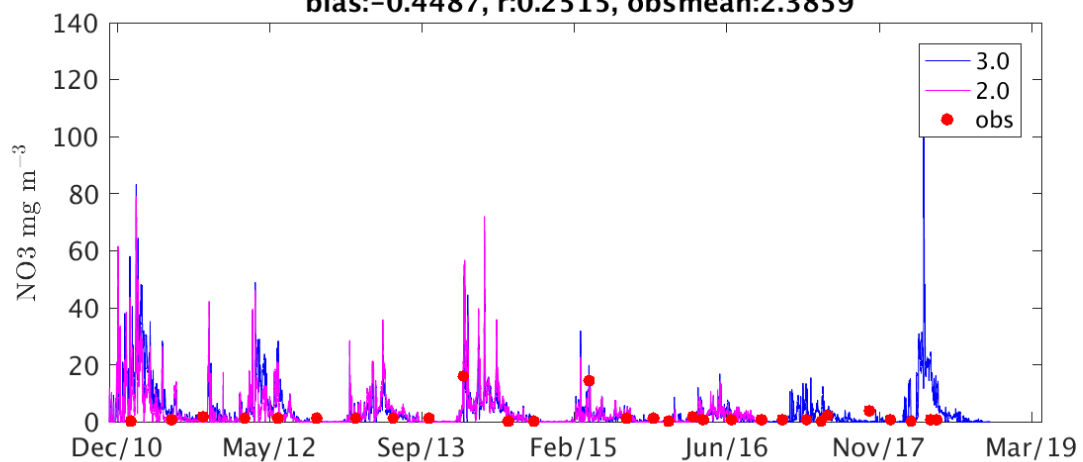

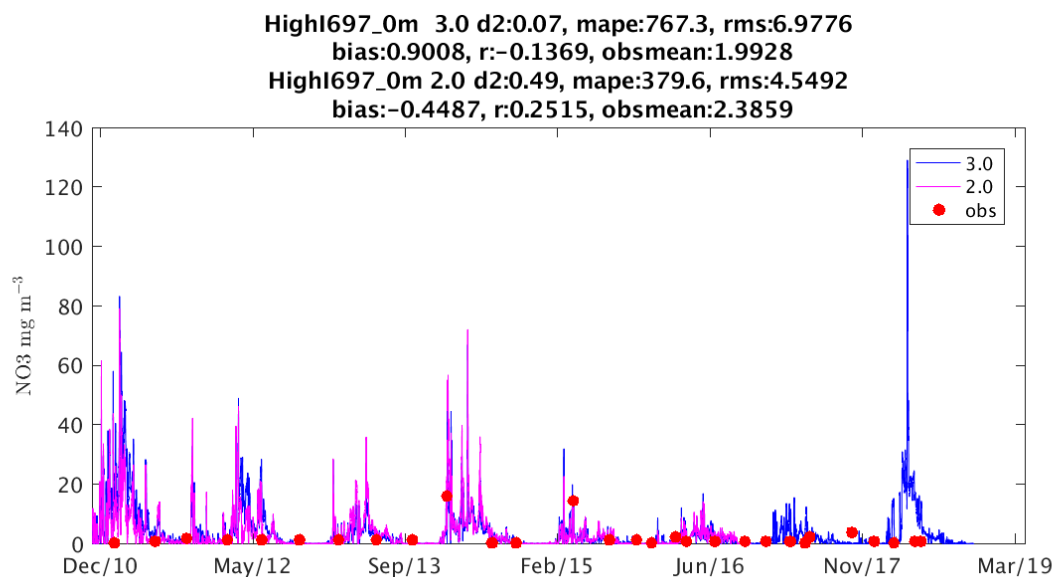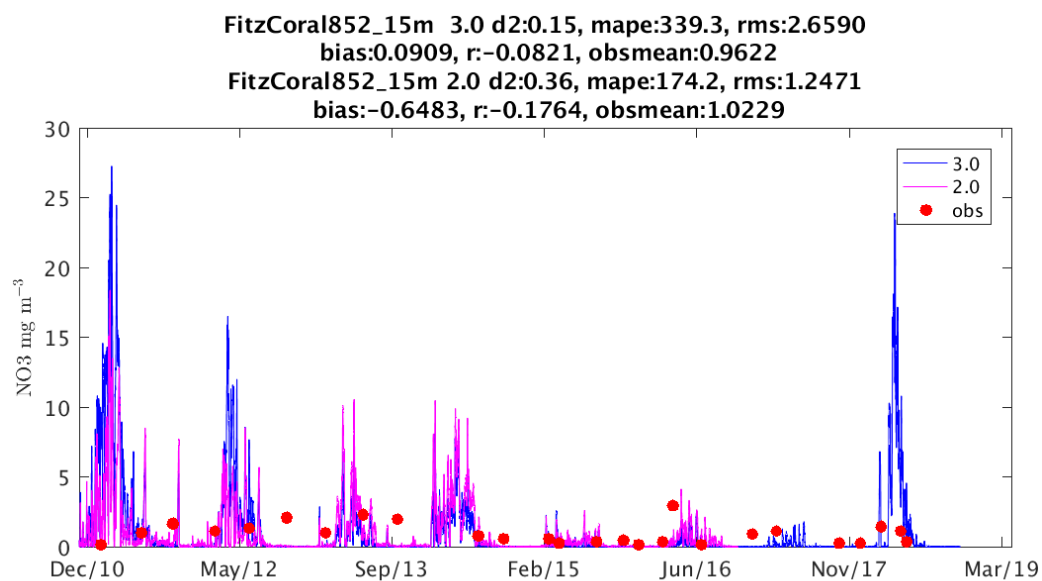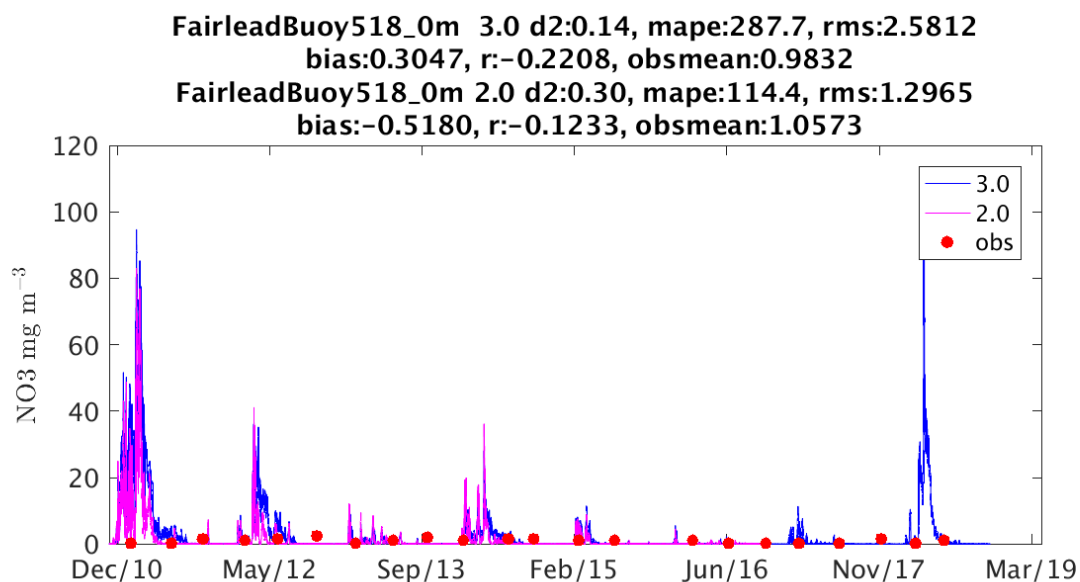

FairleadBuoy518\_0m 3.0 d2:0.14, mape:287.7, rms:2.5812  
 bias:0.3047, r:-0.2208, obsmean:0.9832  
 FairleadBuoy518\_0m 2.0 d2:0.30, mape:114.4, rms:1.2965  
 bias:-0.5180, r:-0.1233, obsmean:1.0573

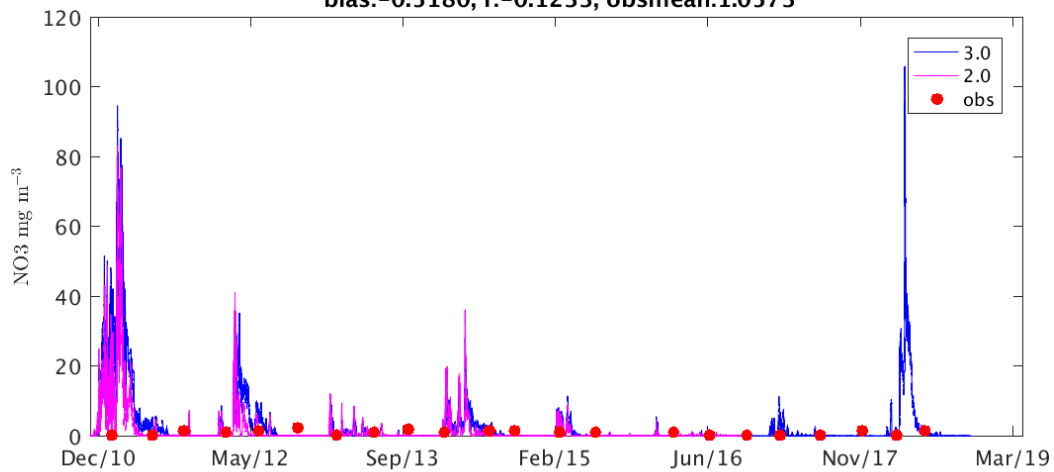

Yorkeys519\_8m 3.0 d2:0.27, mape:275.7, rms:2.0435  
 bias:-0.7598, r:-0.2275, obsmean:1.2110  
 Yorkeys519\_8m 2.0 d2:0.44, mape:85.2, rms:1.4456  
 bias:-1.1000, r:0.3923, obsmean:1.2005

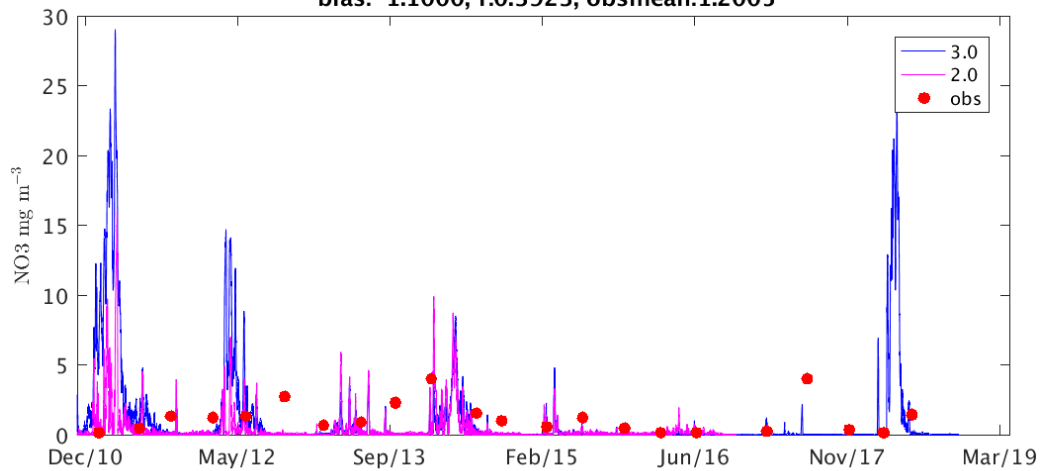

Yorkeys519\_0m 3.0 d2:0.28, mape:161.5, rms:2.1247  
 bias:-0.9196, r:-0.1978, obsmean:1.3327  
 Yorkeys519\_0m 2.0 d2:0.45, mape:83.6, rms:1.4347  
 bias:-1.1839, r:0.1962, obsmean:1.3405

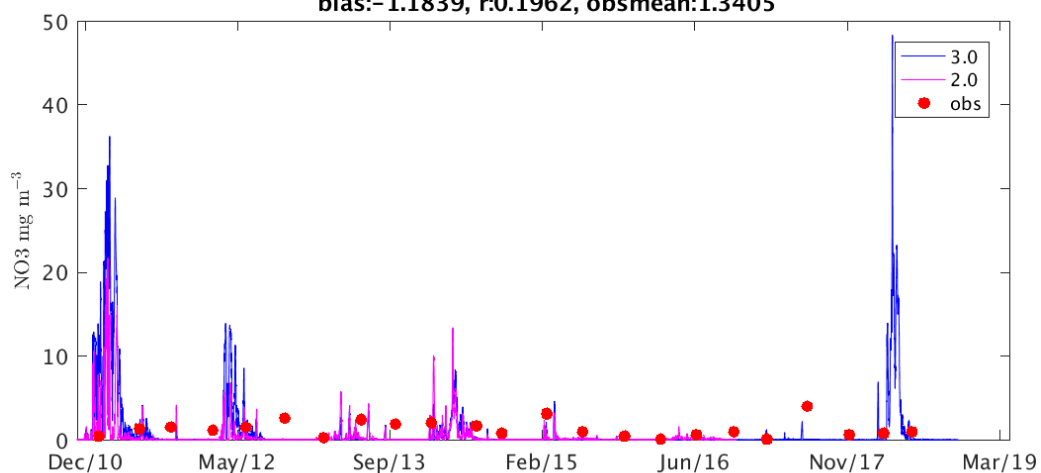

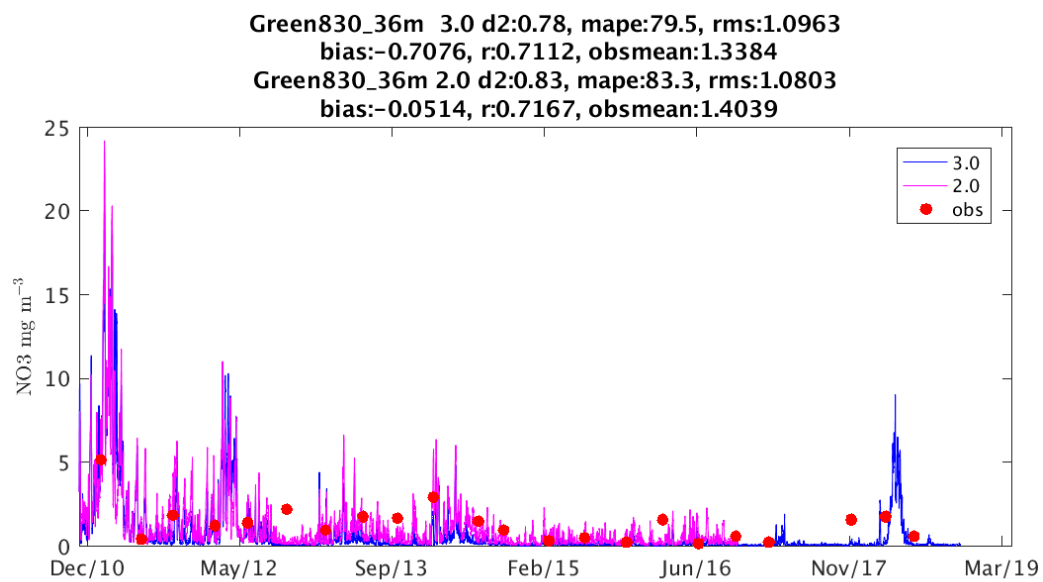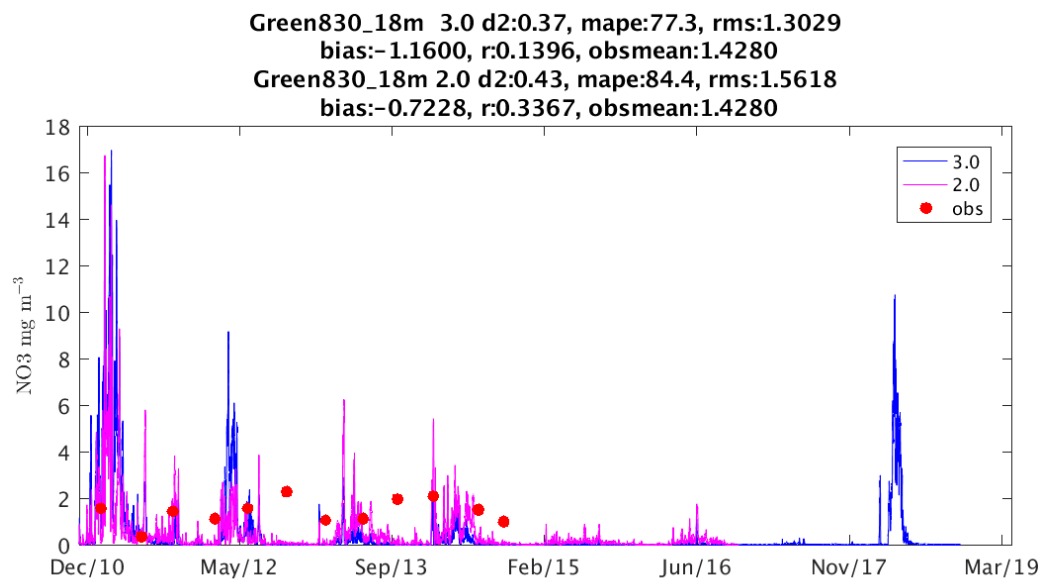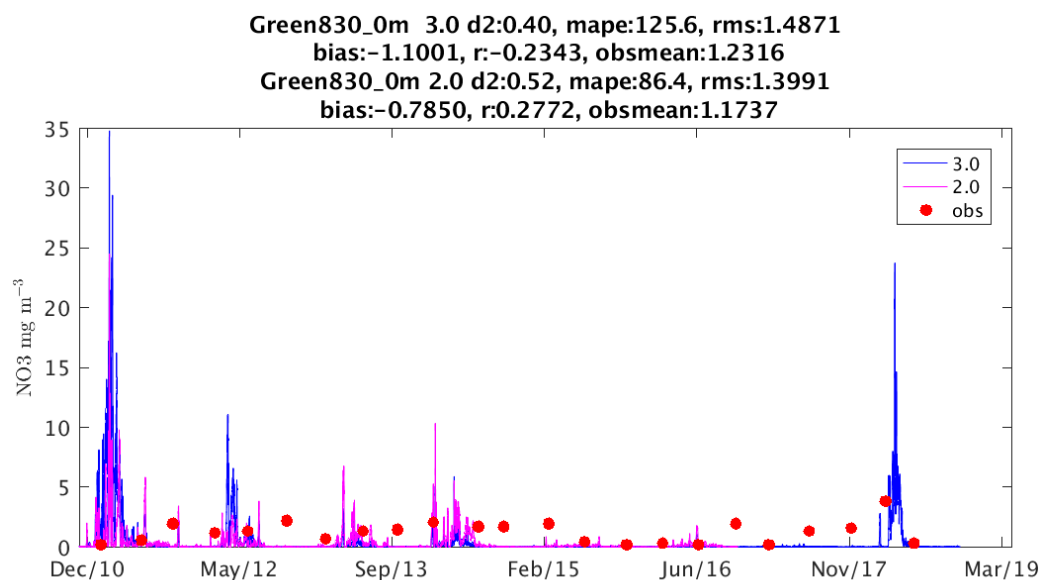

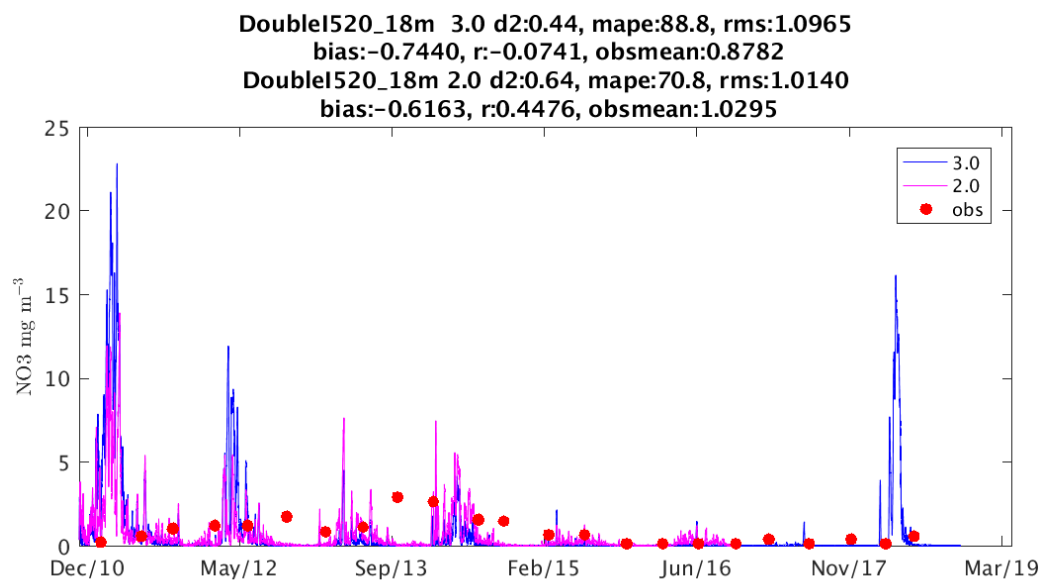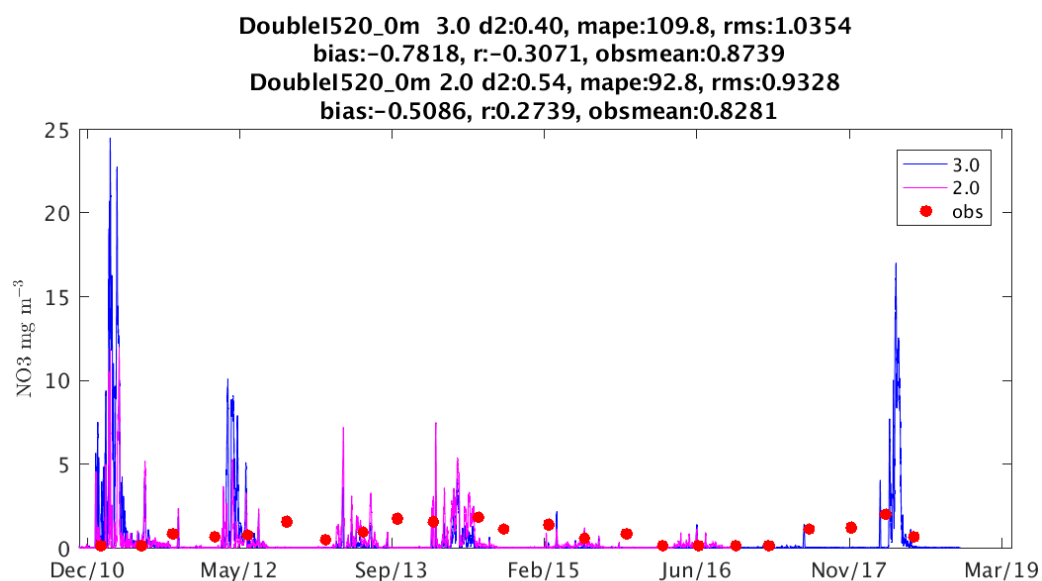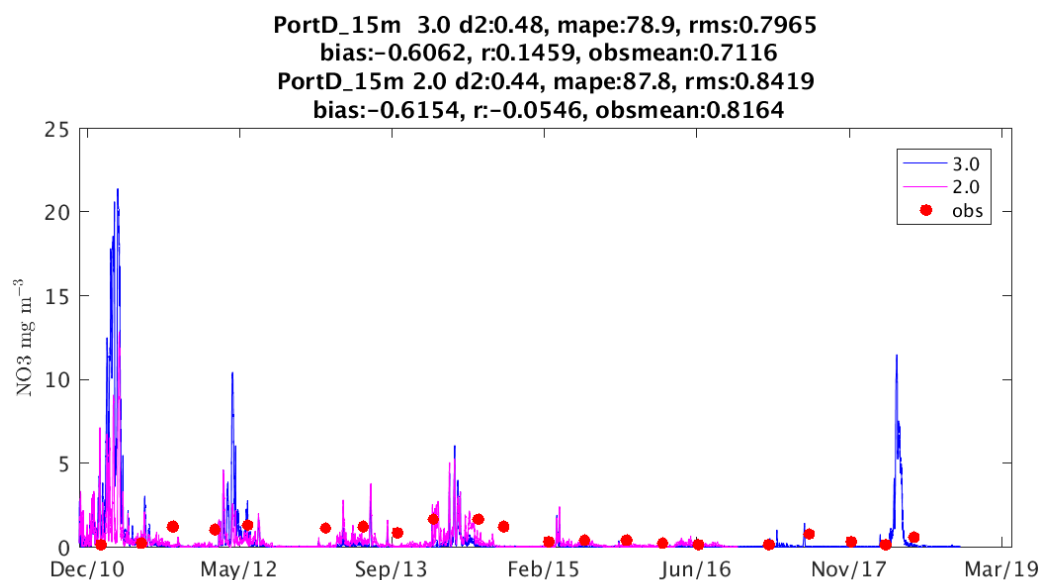



PortD\_0m 3.0 d2:0.34, mape:87.0, rms:2.0542  
 bias:-1.1574, r:-0.0697, obsmean:1.2266  
 PortD\_0m 2.0 d2:0.33, mape:79.9, rms:2.2013  
 bias:-1.1857, r:0.0263, obsmean:1.3158

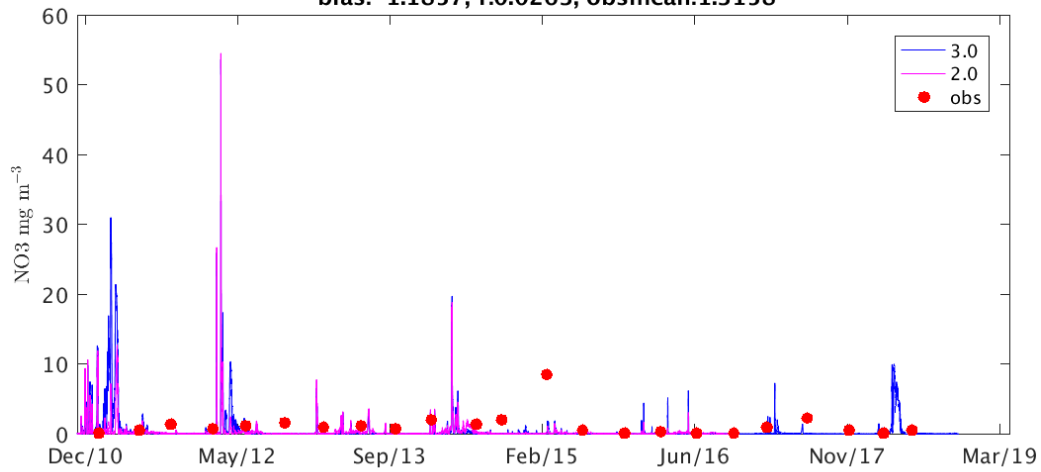

Snap\_10m 3.0 d2:0.45, mape:74.2, rms:3.6532  
 bias:-2.5124, r:-0.0263, obsmean:3.2322  
 Snap\_10m 2.0 d2:0.46, mape:72.4, rms:3.7206  
 bias:-2.6556, r:0.0090, obsmean:3.2322

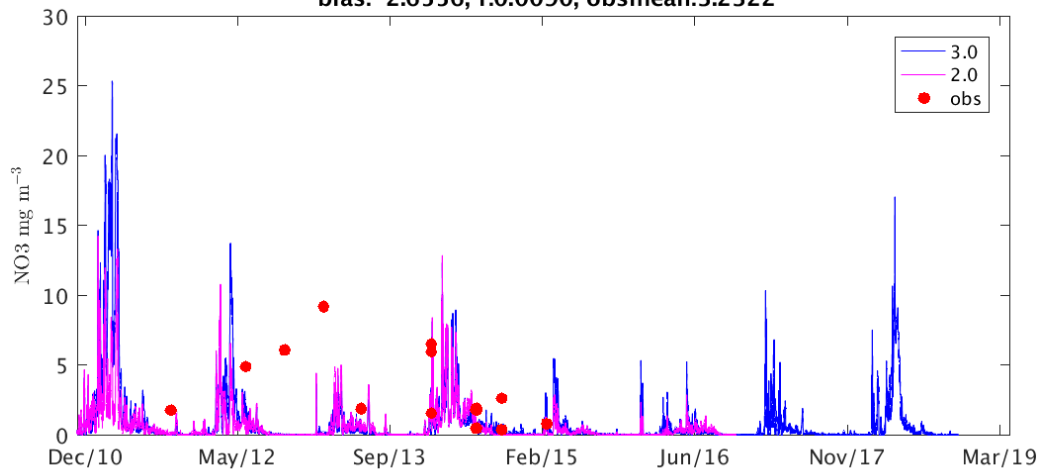

CapeTrib356\_10m 3.0 d2:0.21, mape:311.3, rms:1.5911  
 bias:-0.6762, r:-0.4876, obsmean:1.0425  
 CapeTrib356\_10m 2.0 d2:0.29, mape:163.9, rms:1.2029  
 bias:-0.8154, r:-0.5426, obsmean:1.0425

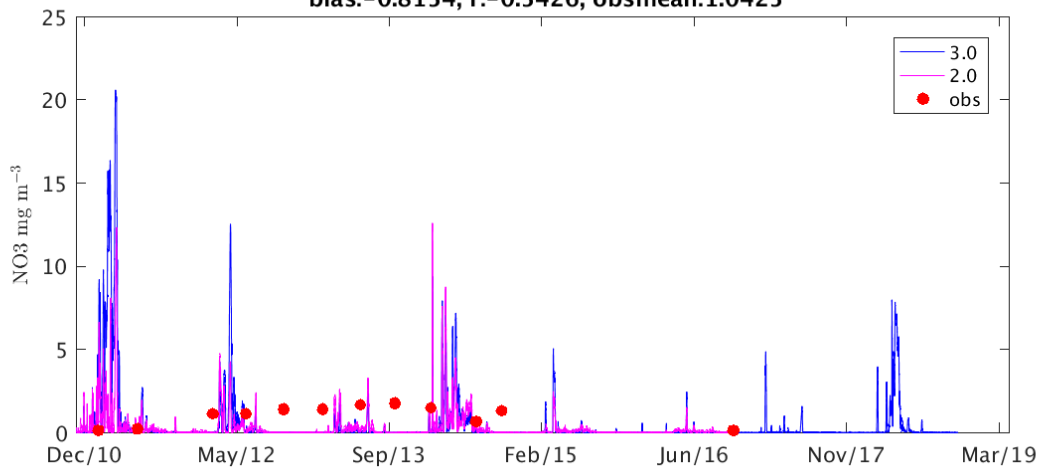

## 14. Simulated NH<sub>4</sub> assessment against AIMS Long Term Monitoring

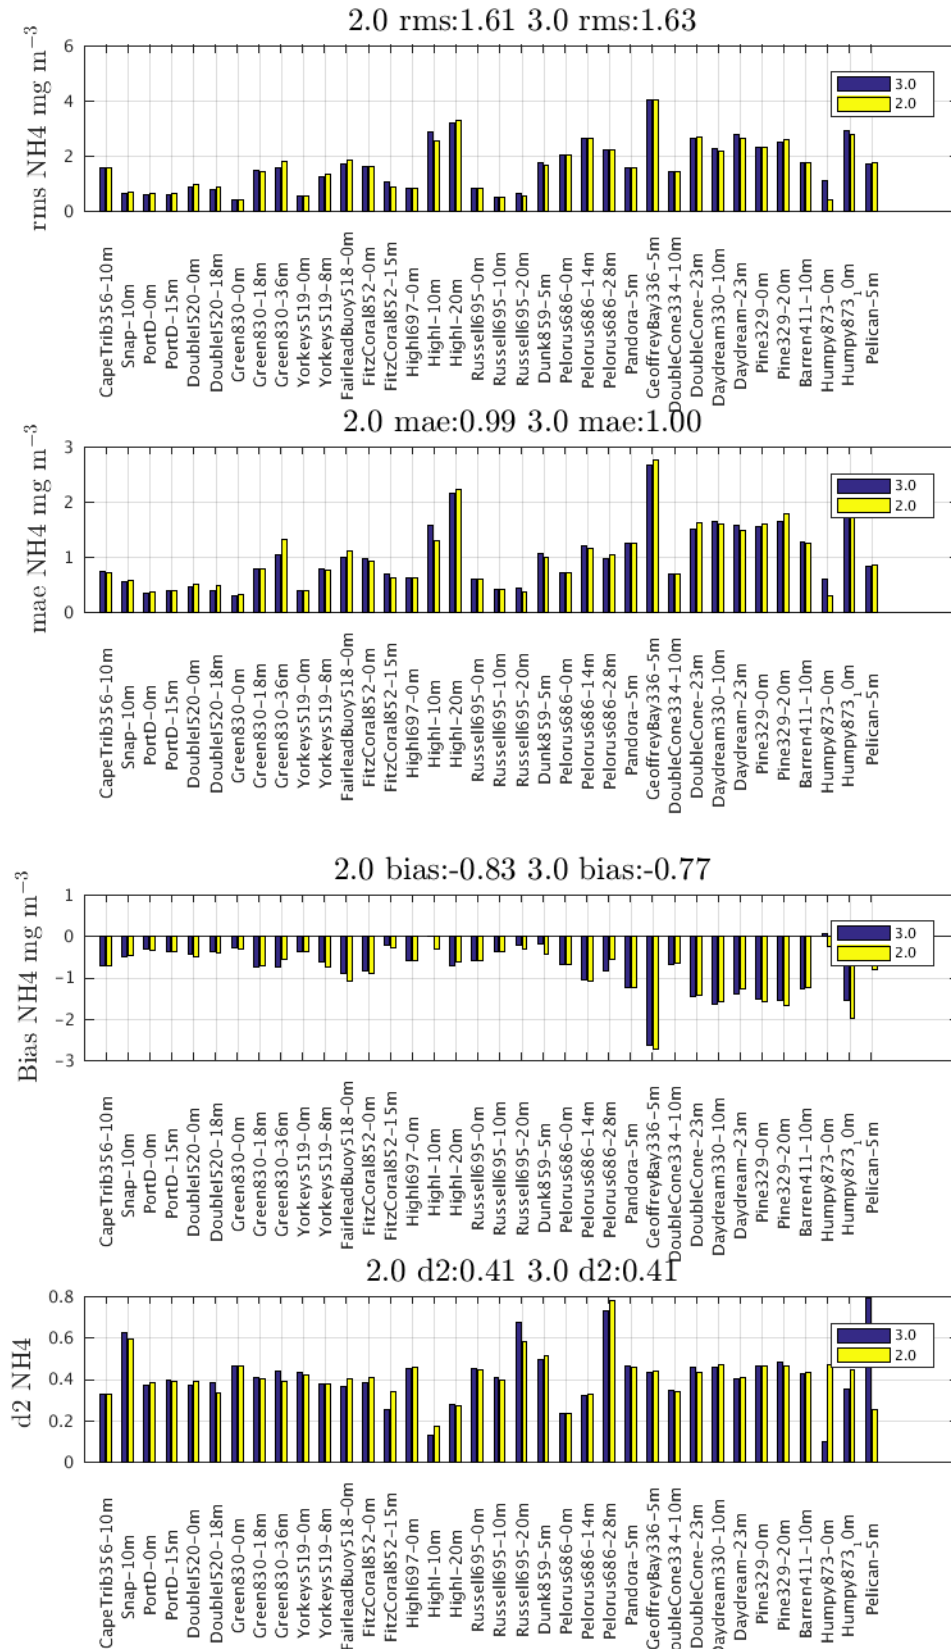

Figure 9 Metrics for Long Term Monitoring sites NH<sub>4</sub> assessment against observations for model version 3p0 and 2p0 d2 = Willmott index see Statistical metric page 27.mae:mean absolute error, rms root mean square

Pelican\_5m 3.0 d2:0.79, mape:89.0, rms:1.6907  
 bias:0.0103, r:0.8810, obsmean:0.7348  
 Pelican\_5m 2.0 d2:0.25, mape:94.7, rms:1.7502  
 bias:-0.8177, r:-0.8855, obsmean:0.7348

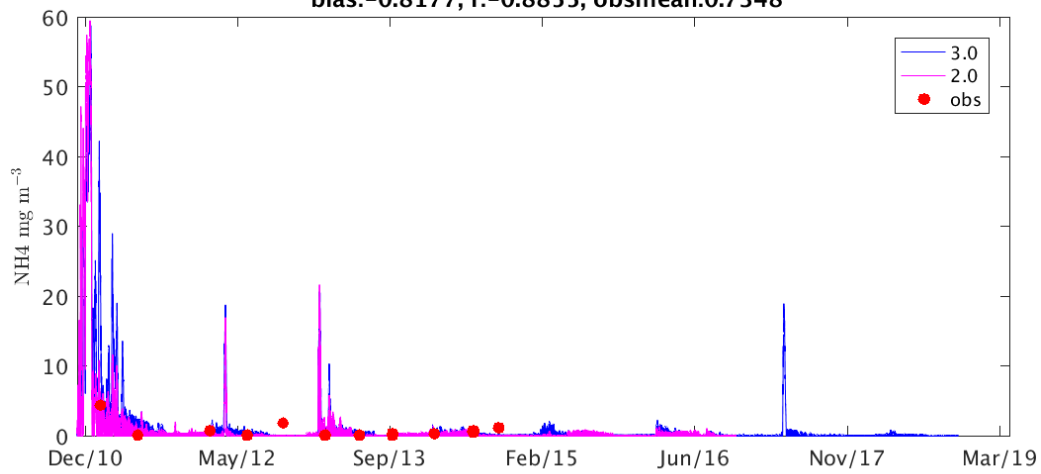

Humpy873\_10m 3.0 d2:0.35, mape:237.6, rms:2.8912  
 bias:-1.5584, r:-0.2555, obsmean:1.9960  
 Humpy873\_10m 2.0 d2:0.44, mape:127.5, rms:2.7663  
 bias:-1.9971, r:0.2897, obsmean:1.9960

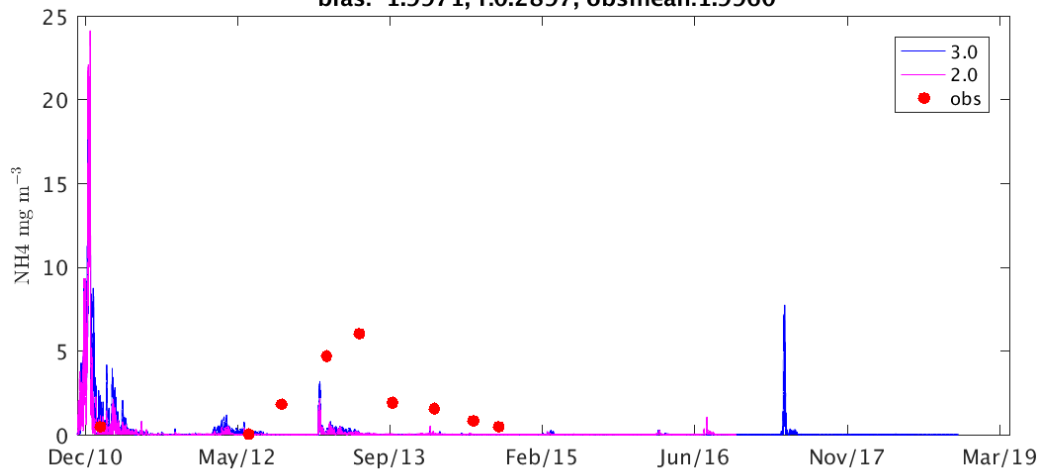

Humpy873\_0m 3.0 d2:0.10, mape:220.2, rms:1.0706  
 bias:0.0604, r:-0.3076, obsmean:0.3058  
 Humpy873\_0m 2.0 d2:0.47, mape:150.5, rms:0.4175  
 bias:-0.2462, r:-0.0256, obsmean:0.3058

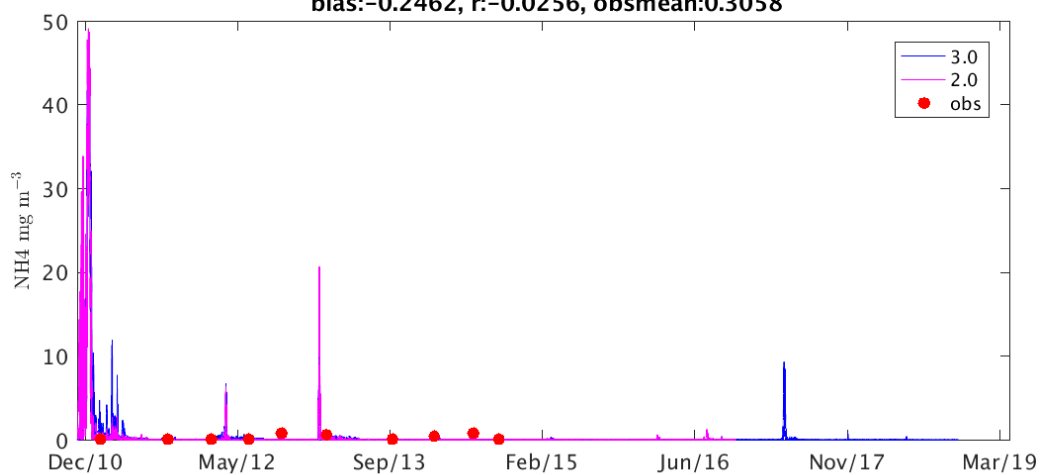

Barren411\_10m 3.0 d2:0.42, mape:94.3, rms:1.7634  
 bias:-1.2681, r:0.8369, obsmean:1.3005  
 Barren411\_10m 2.0 d2:0.43, mape:89.4, rms:1.7239  
 bias:-1.2438, r:0.7599, obsmean:1.3005

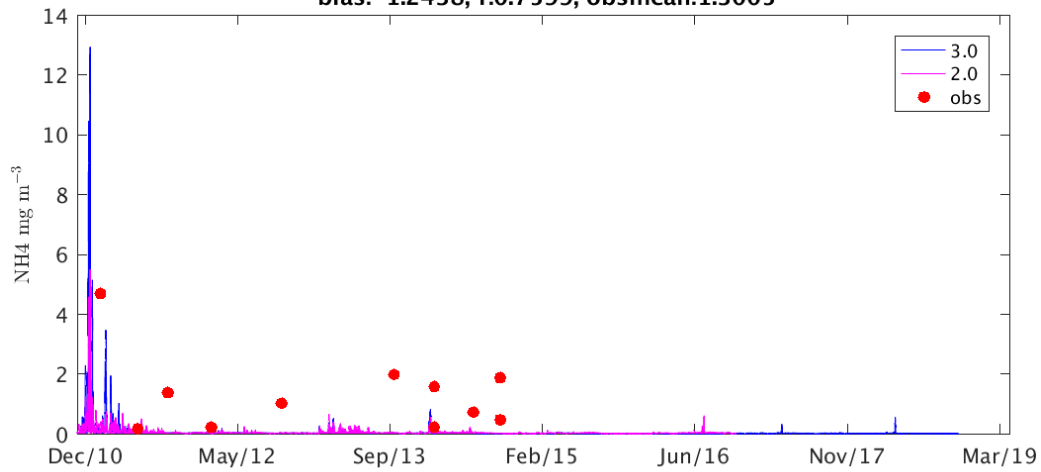

Pine329\_20m 3.0 d2:0.48, mape:79.9, rms:2.5048  
 bias:-1.5693, r:0.2186, obsmean:1.8877  
 Pine329\_20m 2.0 d2:0.46, mape:86.9, rms:2.5896  
 bias:-1.6949, r:0.2338, obsmean:1.8877

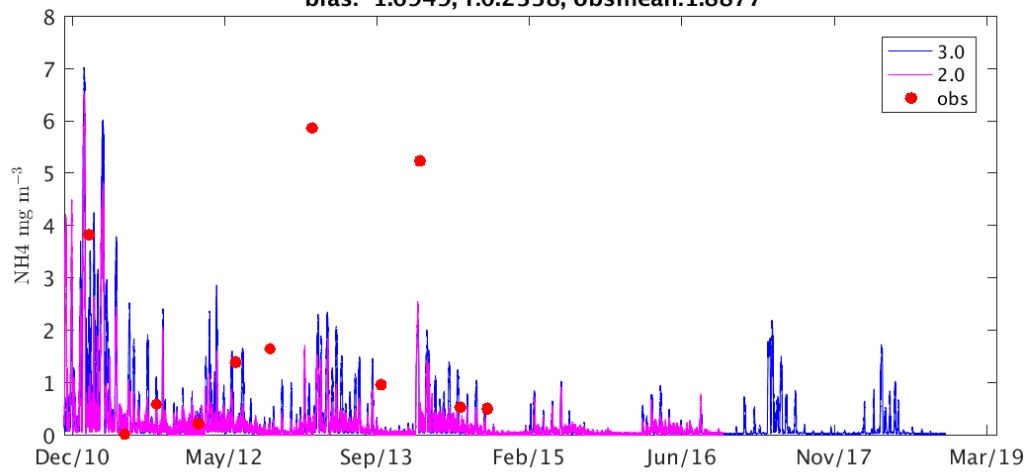

Pine329\_0m 3.0 d2:0.46, mape:80.5, rms:2.2893  
 bias:-1.5255, r:0.1459, obsmean:1.7753  
 Pine329\_0m 2.0 d2:0.46, mape:77.7, rms:2.3135  
 bias:-1.5932, r:0.3186, obsmean:1.7753

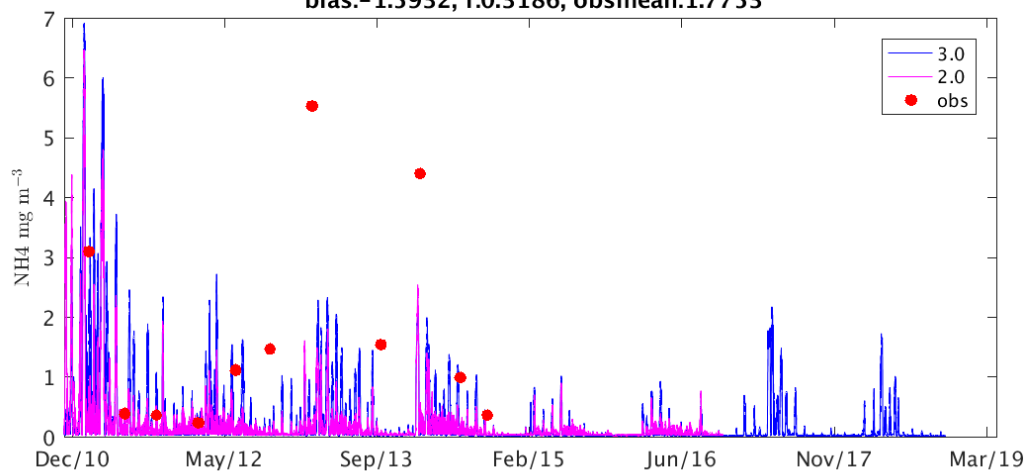

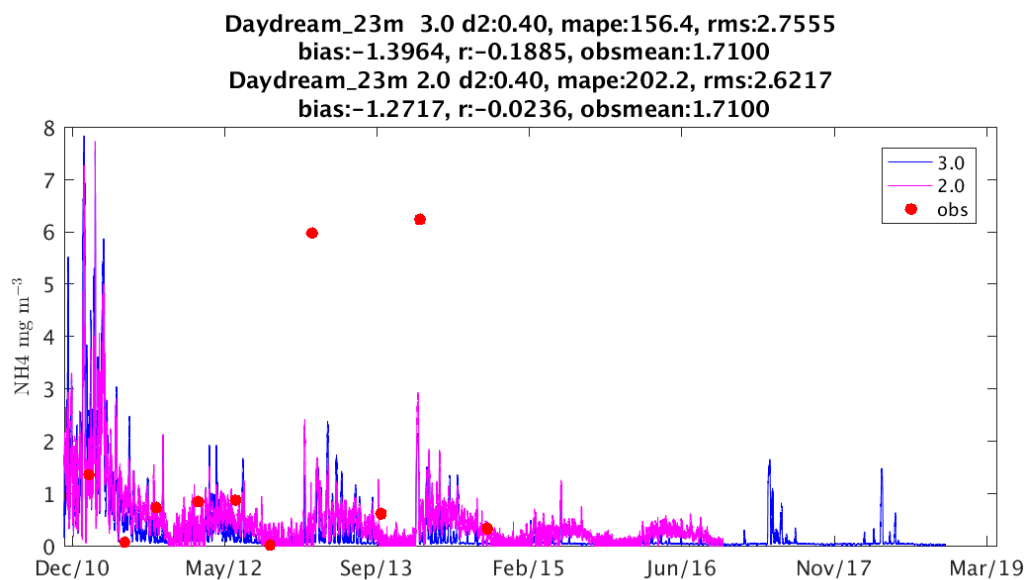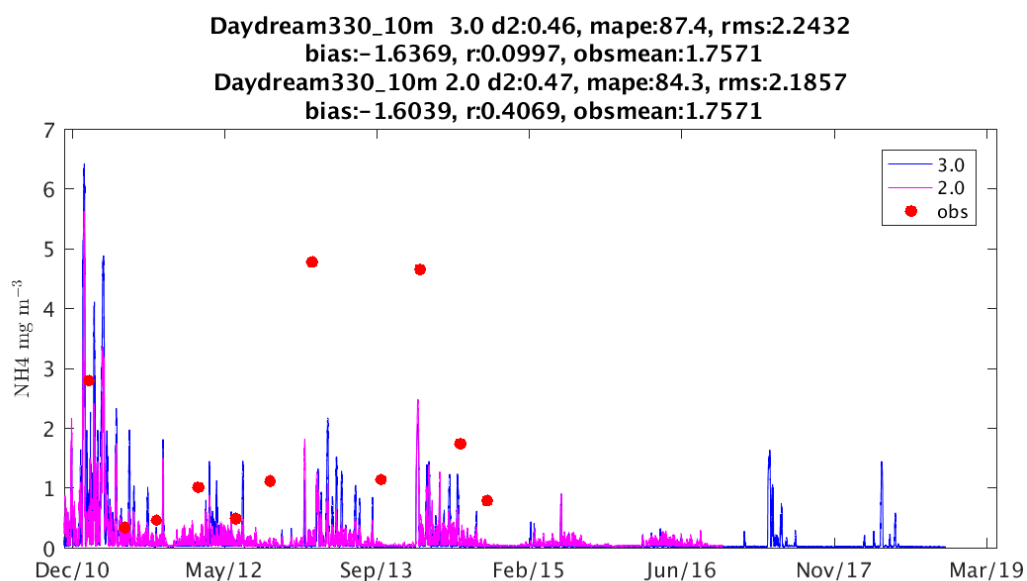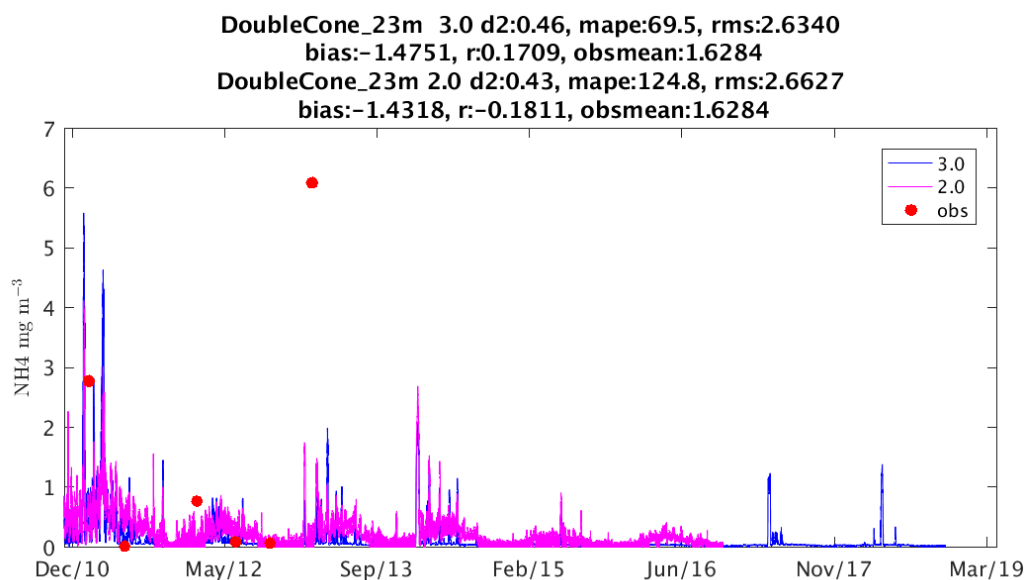

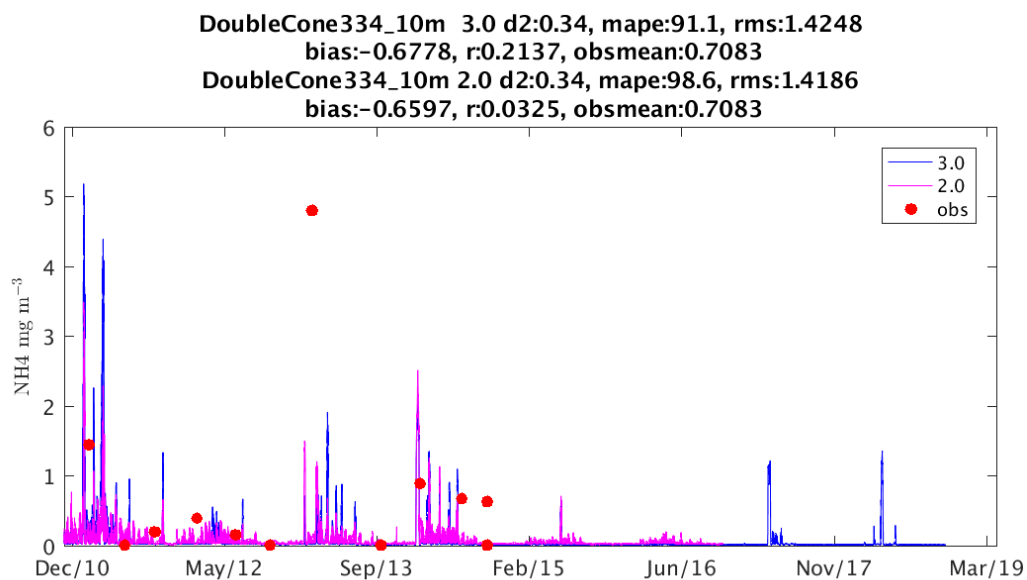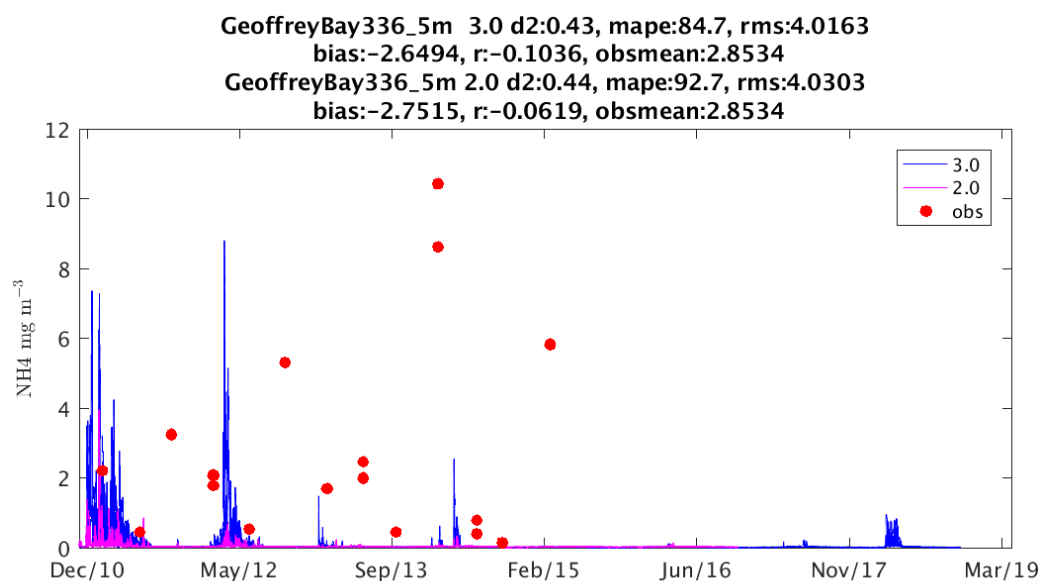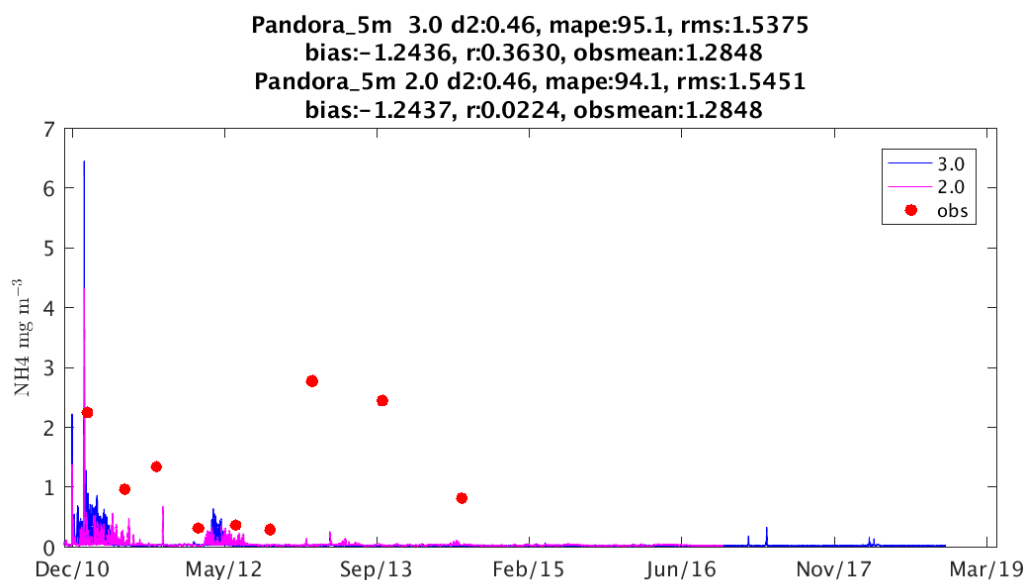

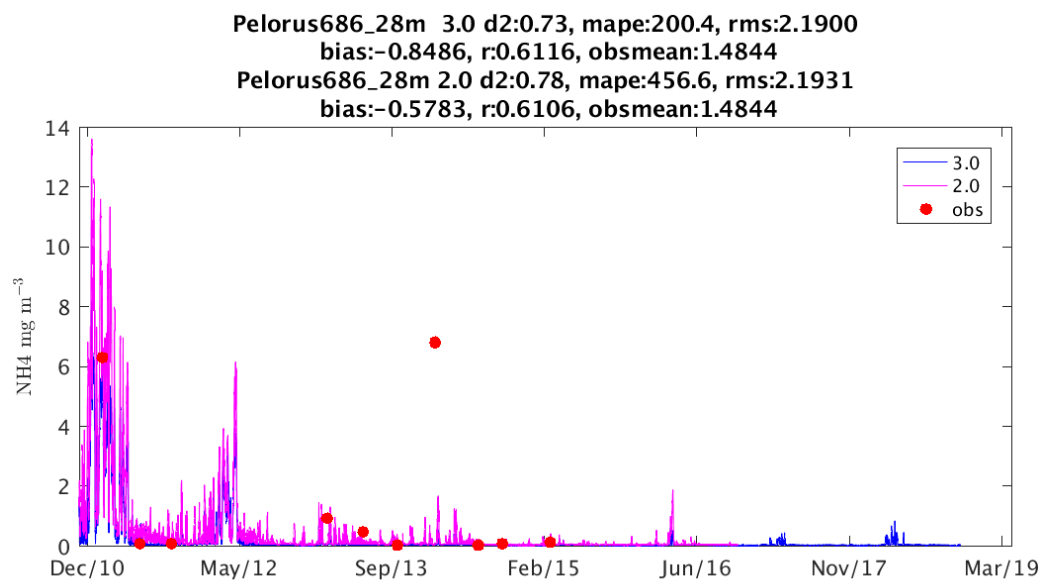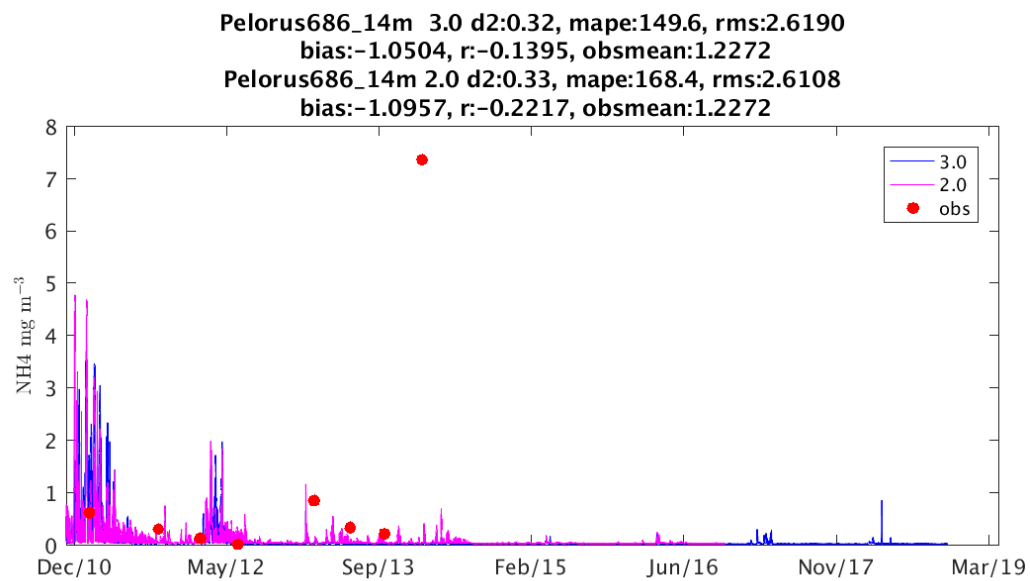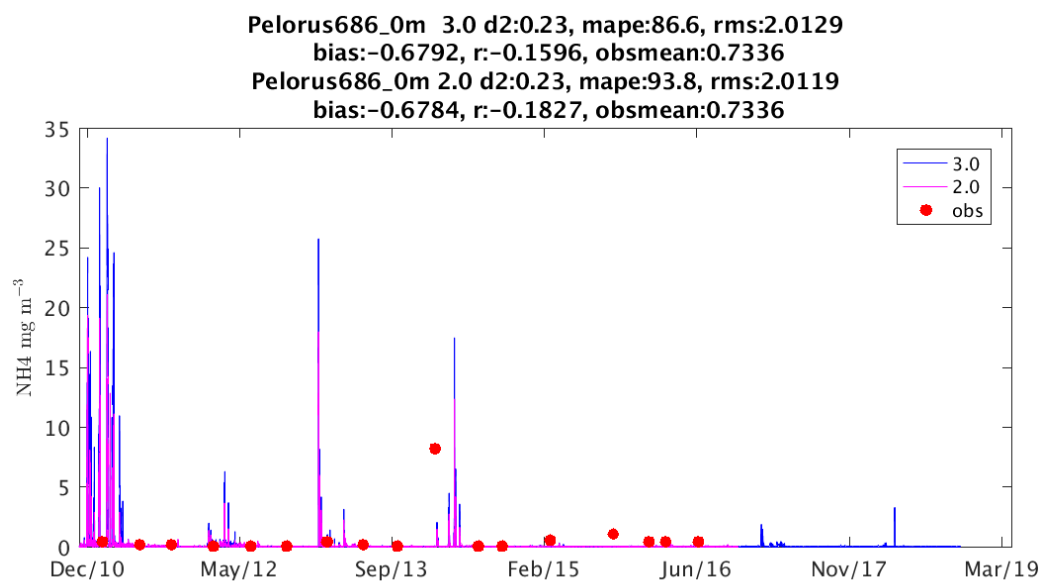

**Russell695\_20m 3.0 d2:0.67, mape:87.2, rms:0.6295**  
**bias:-0.2208, r:0.4974, obsmean:0.4610**  
**Russell695\_20m 2.0 d2:0.58, mape:112.0, rms:0.5415**  
**bias:-0.3226, r:0.5060, obsmean:0.4610**

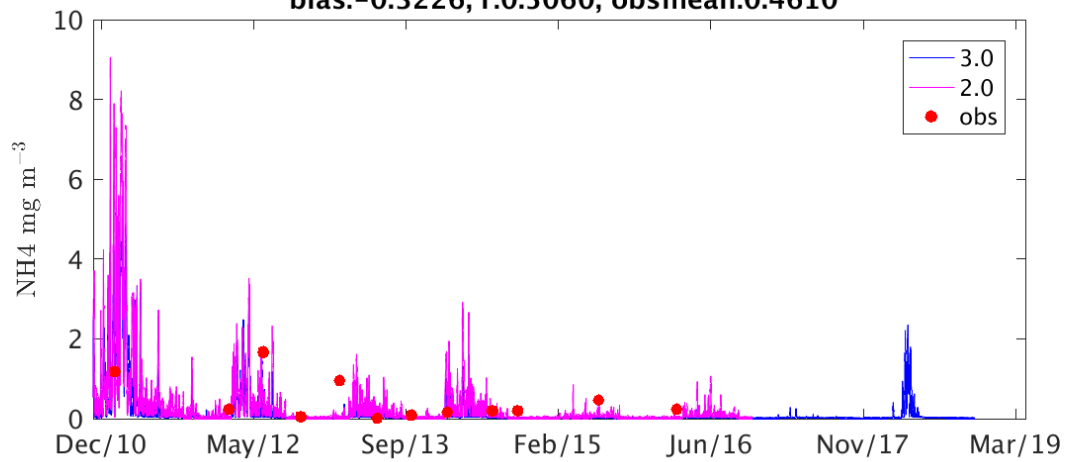

**Russell695\_20m 3.0 d2:0.67, mape:87.2, rms:0.6295**  
**bias:-0.2208, r:0.4974, obsmean:0.4610**  
**Russell695\_20m 2.0 d2:0.58, mape:112.0, rms:0.5415**  
**bias:-0.3226, r:0.5060, obsmean:0.4610**

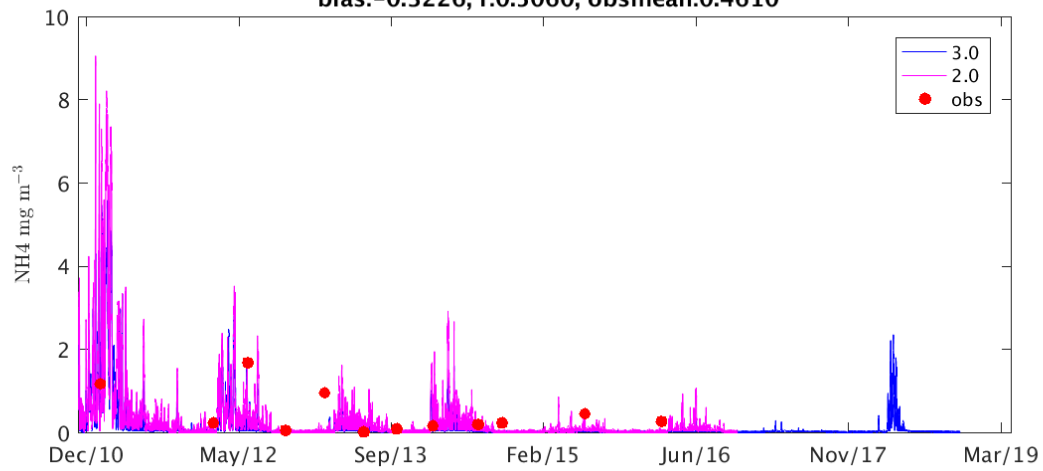

**Russell695\_10m 3.0 d2:0.40, mape:117.4, rms:0.5050**  
**bias:-0.3828, r:-0.4052, obsmean:0.4287**  
**Russell695\_10m 2.0 d2:0.39, mape:112.8, rms:0.5058**  
**bias:-0.3774, r:-0.5511, obsmean:0.4287**

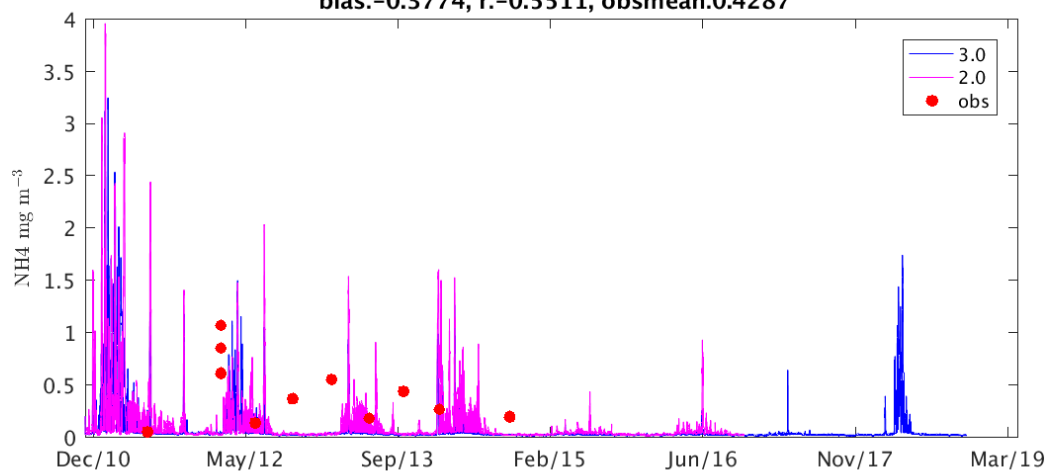



**Russell695\_0m 3.0 d2:0.45, mape:79.9, rms:0.8126**  
**bias:-0.6032, r:-0.1053, obsmean:0.6433**  
**Russell695\_0m 2.0 d2:0.45, mape:82.2, rms:0.8045**  
**bias:-0.5885, r:-0.1475, obsmean:0.6433**

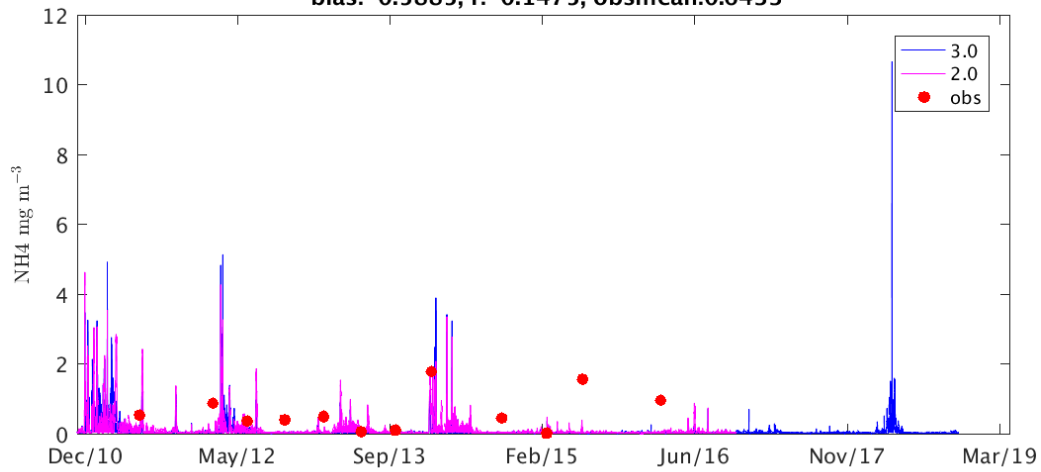

**Highl\_20m 3.0 d2:0.28, mape:440.4, rms:3.1876**  
**bias:-0.7305, r:-0.1468, obsmean:1.7024**  
**Highl\_20m 2.0 d2:0.27, mape:472.2, rms:3.2901**  
**bias:-0.6242, r:-0.1401, obsmean:1.7024**

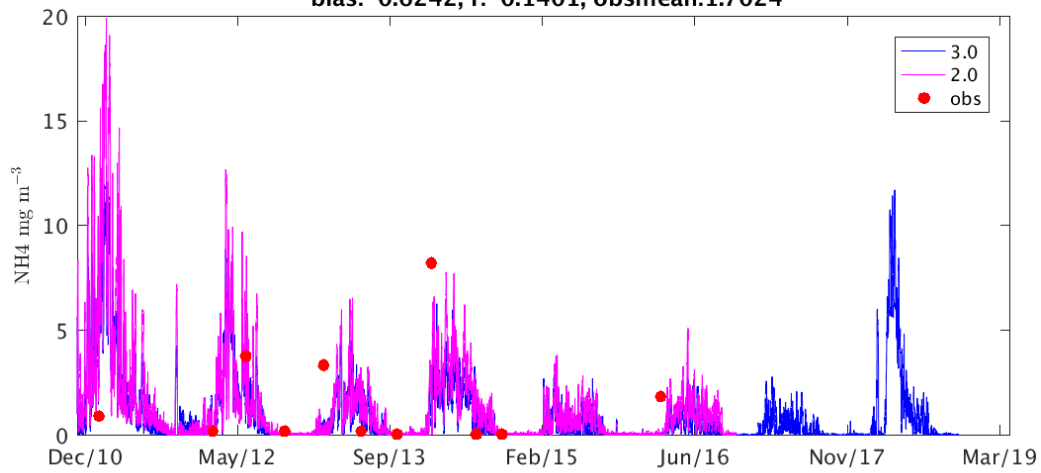

**Highl\_10m 3.0 d2:0.12, mape:74.1, rms:2.8698**  
**bias:-0.0183, r:-0.1929, obsmean:0.8180**  
**Highl\_10m 2.0 d2:0.17, mape:91.2, rms:2.5441**  
**bias:-0.3127, r:-0.2060, obsmean:0.8180**

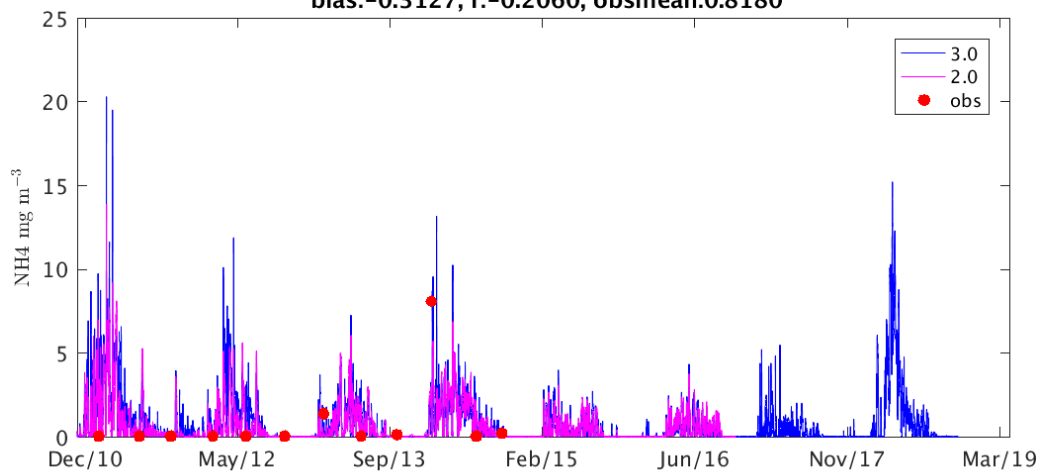

Highl697\_0m 3.0 d2:0.45, mape:107.1, rms:0.8318  
 bias:-0.6026, r:-0.4427, obsmean:0.6654  
 Highl697\_0m 2.0 d2:0.46, mape:121.9, rms:0.8326  
 bias:-0.6092, r:-0.0719, obsmean:0.6654

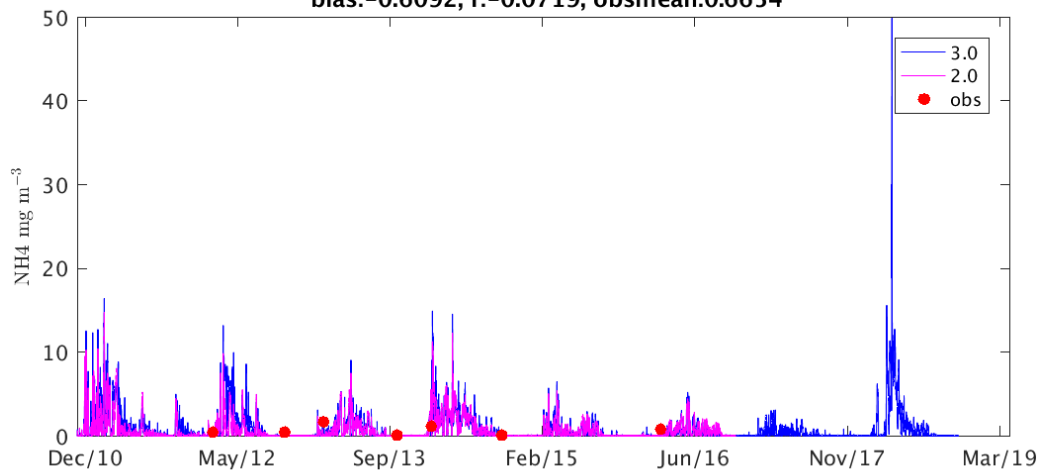

FitzCoral852\_15m 3.0 d2:0.25, mape:246.1, rms:1.0254  
 bias:-0.2191, r:-0.2335, obsmean:0.5274  
 FitzCoral852\_15m 2.0 d2:0.34, mape:203.5, rms:0.8421  
 bias:-0.2867, r:-0.1899, obsmean:0.5274

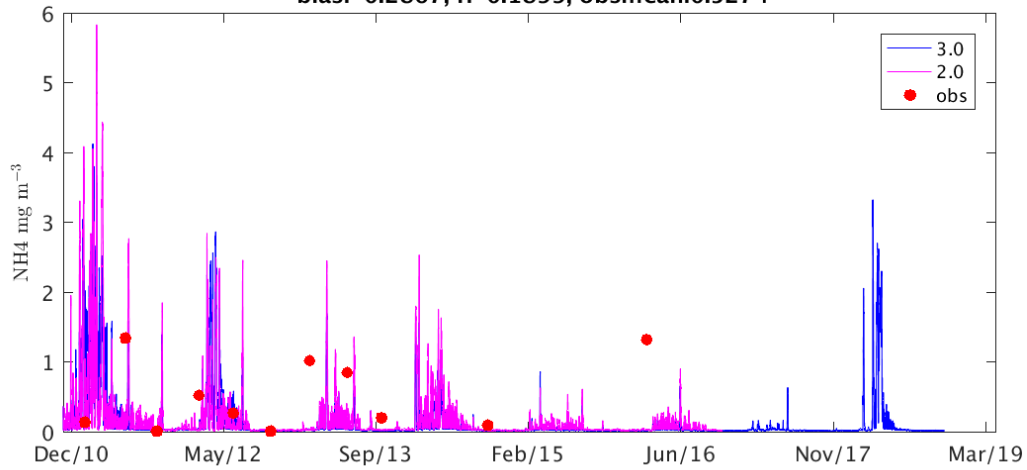

FitzCoral852\_0m 3.0 d2:0.38, mape:102.3, rms:1.6010  
 bias:-0.8564, r:-0.1490, obsmean:0.9639  
 FitzCoral852\_0m 2.0 d2:0.40, mape:82.5, rms:1.5815  
 bias:-0.9016, r:-0.1316, obsmean:0.9639

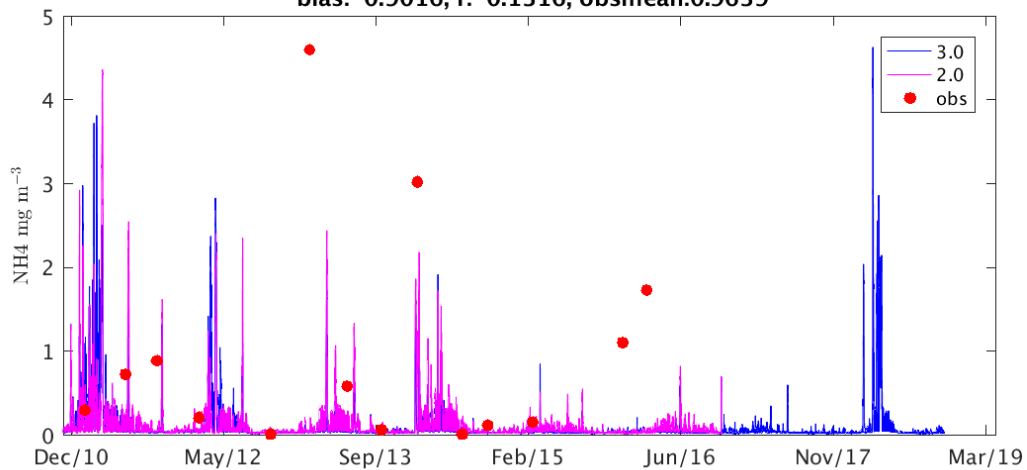

Yorkeys519\_8m 3.0 d2:0.37, mape:284.1, rms:1.2314  
 bias:-0.6240, r:-0.0555, obsmean:0.7553  
 Yorkeys519\_8m 2.0 d2:0.38, mape:181.6, rms:1.3230  
 bias:-0.7446, r:-0.2606, obsmean:0.7745

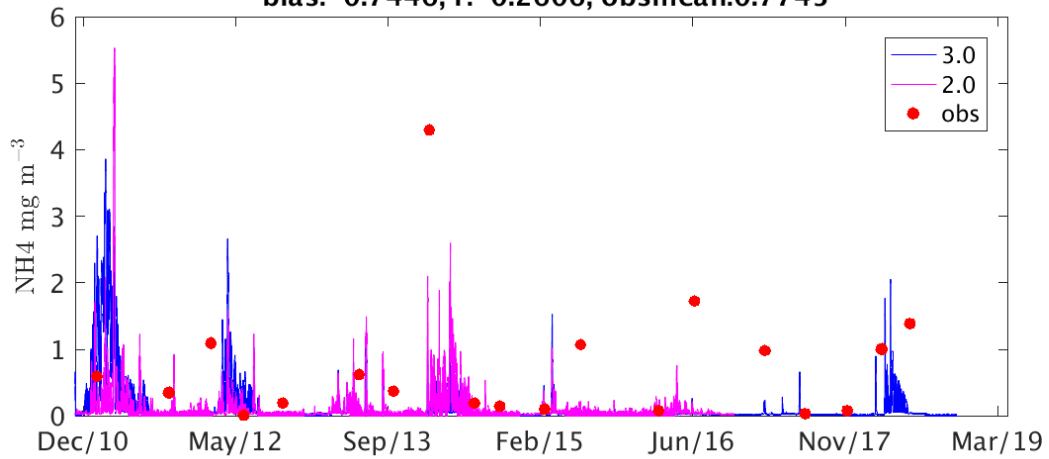

Yorkeys519\_8m 3.0 d2:0.37, mape:284.1, rms:1.2314  
 bias:-0.6240, r:-0.0555, obsmean:0.7553  
 Yorkeys519\_8m 2.0 d2:0.38, mape:181.6, rms:1.3230  
 bias:-0.7446, r:-0.2606, obsmean:0.7745

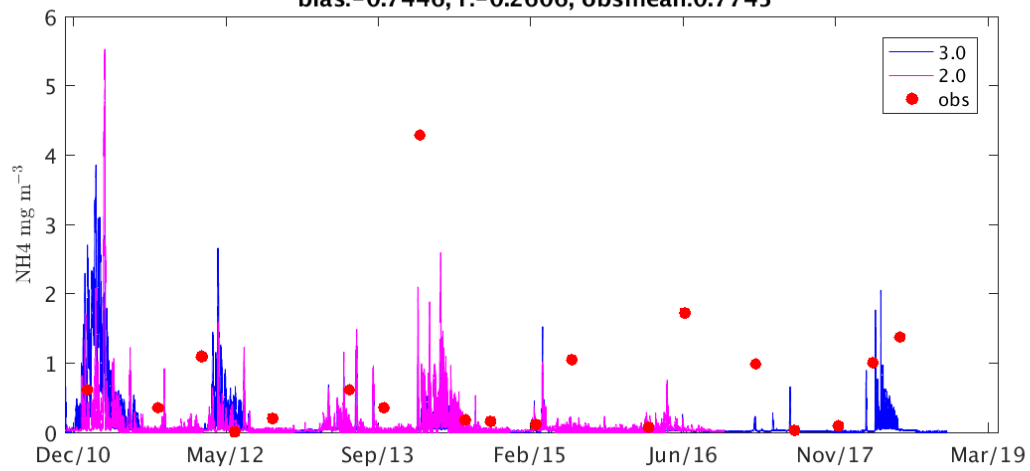

Yorkeys519\_0m 3.0 d2:0.43, mape:84.5, rms:0.5556  
 bias:-0.3711, r:-0.0683, obsmean:0.4225  
 Yorkeys519\_0m 2.0 d2:0.42, mape:93.7, rms:0.5498  
 bias:-0.3759, r:0.0060, obsmean:0.4251

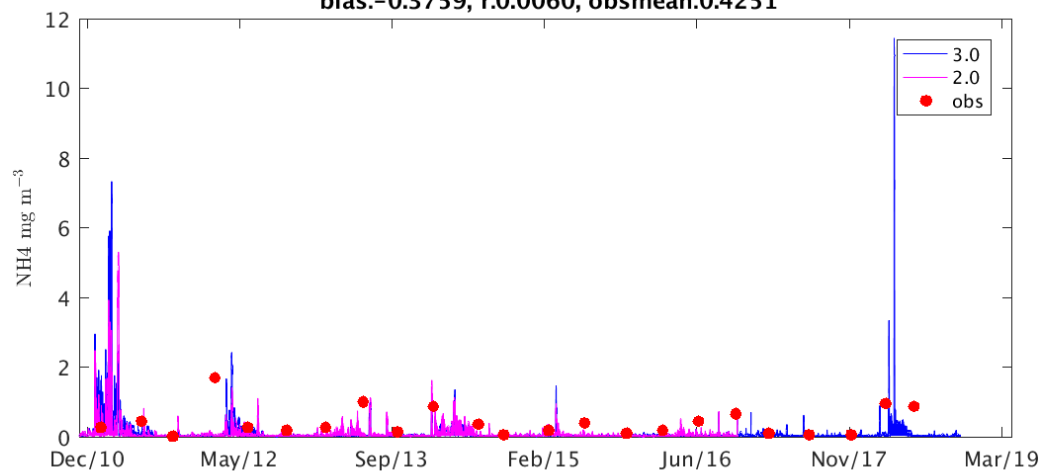

Green830\_36m 3.0 d2:0.44, mape:109.7, rms:1.5635  
 bias:-0.7596, r:0.0206, obsmean:1.0298  
 Green830\_36m 2.0 d2:0.39, mape:211.8, rms:1.8060  
 bias:-0.5515, r:-0.0371, obsmean:1.1478

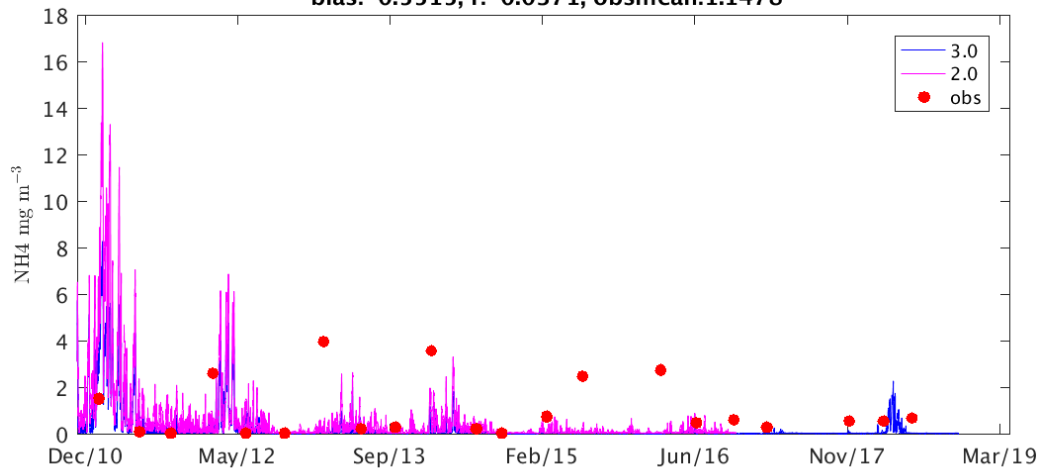

Green830\_18m 3.0 d2:0.41, mape:85.3, rms:1.4584  
 bias:-0.7597, r:0.0662, obsmean:0.8007  
 Green830\_18m 2.0 d2:0.40, mape:75.8, rms:1.4221  
 bias:-0.7089, r:0.1792, obsmean:0.8007

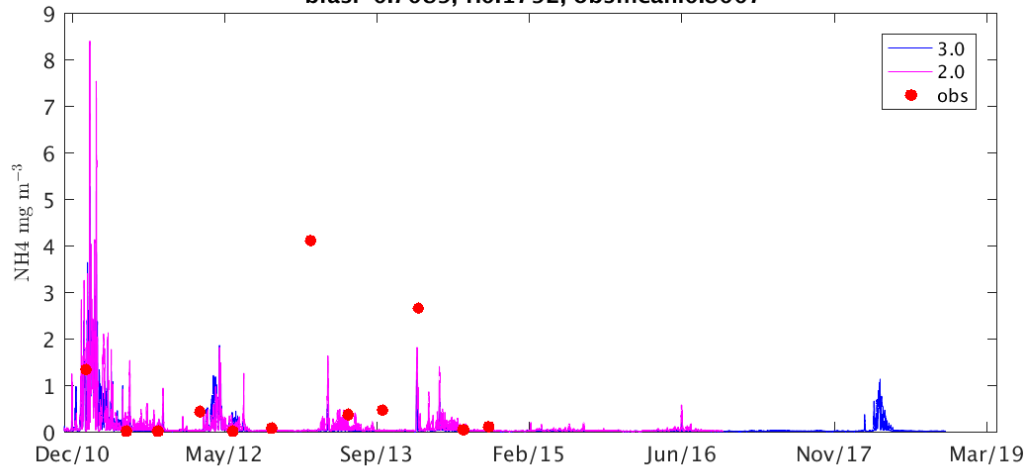

Green830\_0m 3.0 d2:0.46, mape:376.2, rms:0.3936  
 bias:-0.2920, r:-0.0007, obsmean:0.3296  
 Green830\_0m 2.0 d2:0.46, mape:533.1, rms:0.4101  
 bias:-0.3135, r:0.1547, obsmean:0.3712

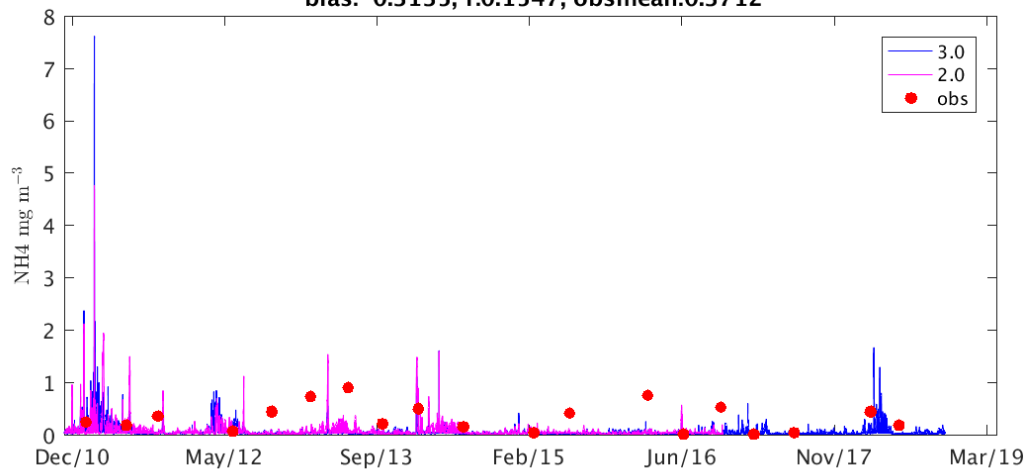

Doublel520\_18m 3.0 d2:0.38, mape:184.1, rms:0.7741  
 bias:-0.3811, r:0.2004, obsmean:0.4387  
 Doublel520\_18m 2.0 d2:0.33, mape:310.0, rms:0.8726  
 bias:-0.4074, r:-0.1858, obsmean:0.4806

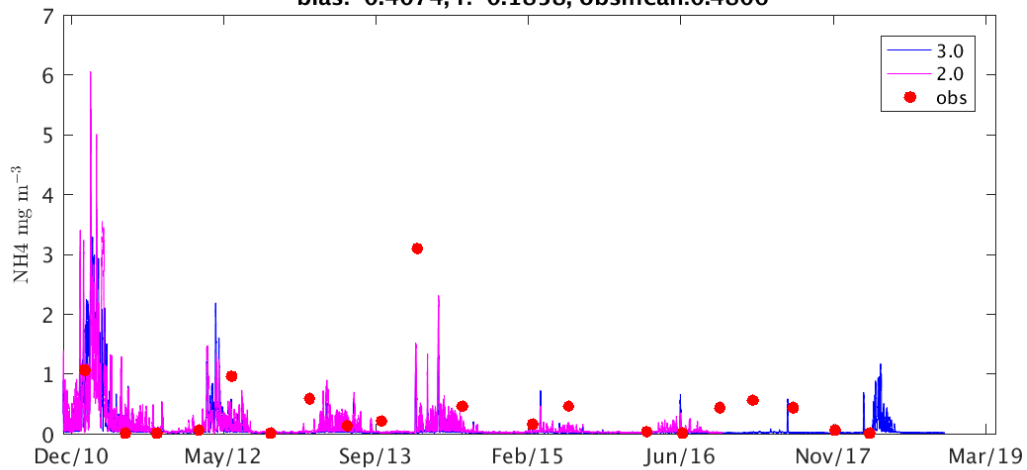

Doublel520\_0m 3.0 d2:0.37, mape:76.4, rms:0.8572  
 bias:-0.4441, r:-0.0343, obsmean:0.4800  
 Doublel520\_0m 2.0 d2:0.39, mape:73.3, rms:0.9400  
 bias:-0.4884, r:-0.1716, obsmean:0.5352

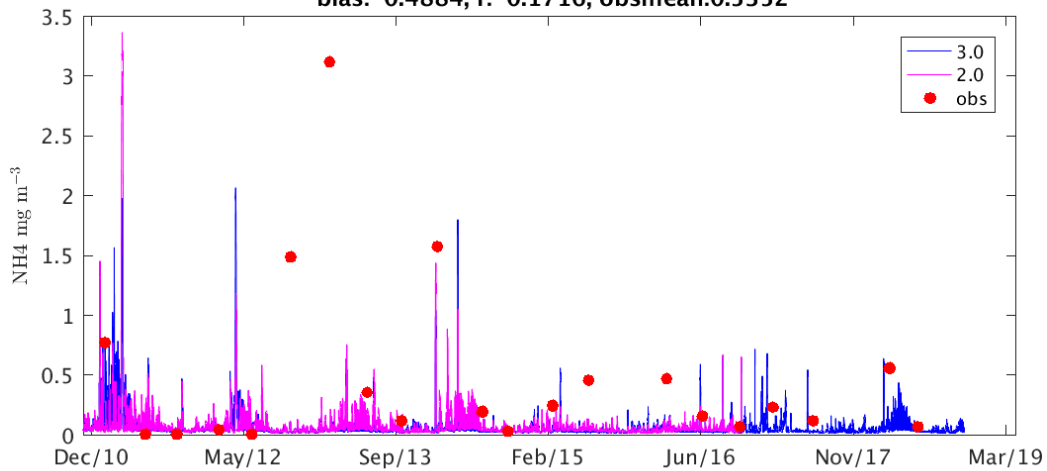

PortD\_15m 3.0 d2:0.39, mape:81.6, rms:0.5820  
 bias:-0.3682, r:0.0638, obsmean:0.4063  
 PortD\_15m 2.0 d2:0.39, mape:79.5, rms:0.6096  
 bias:-0.3698, r:-0.0474, obsmean:0.4213

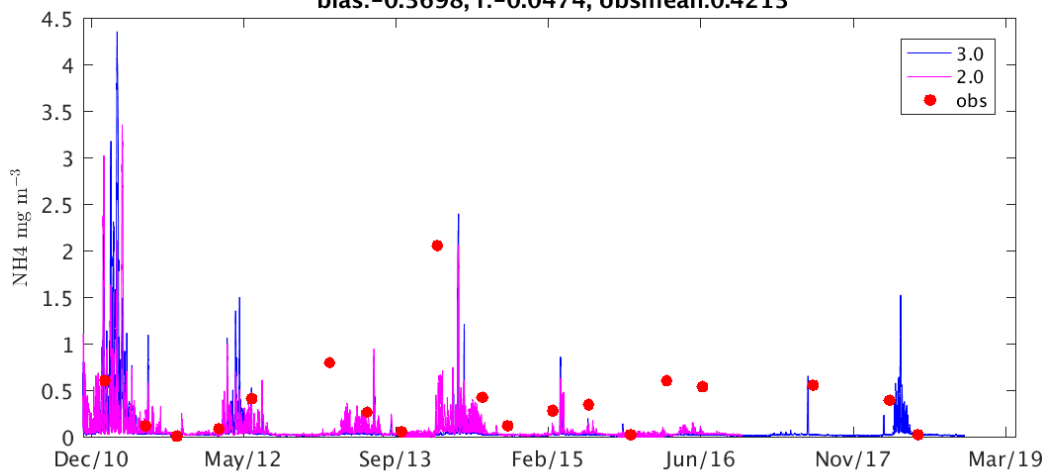

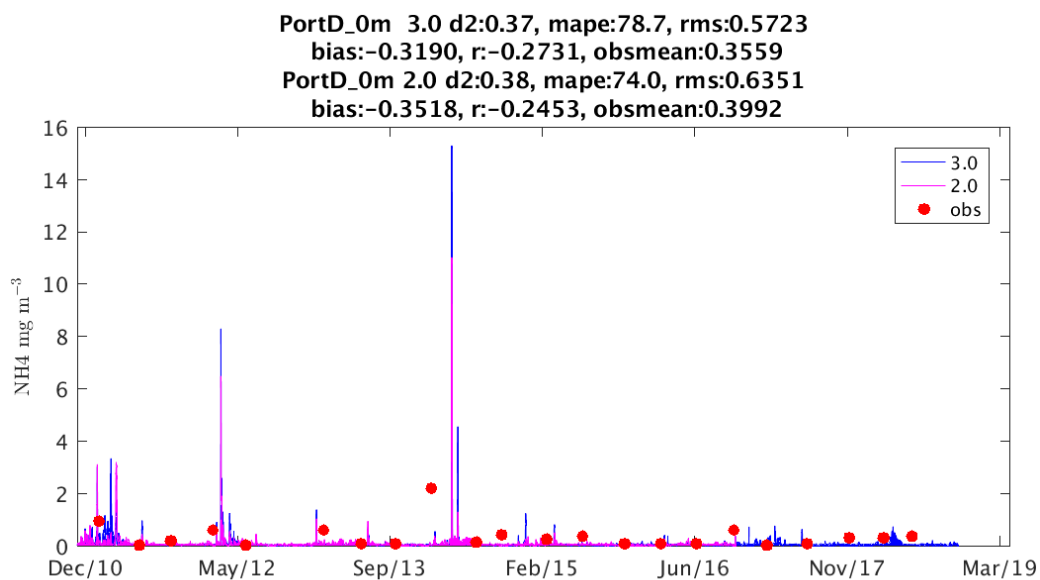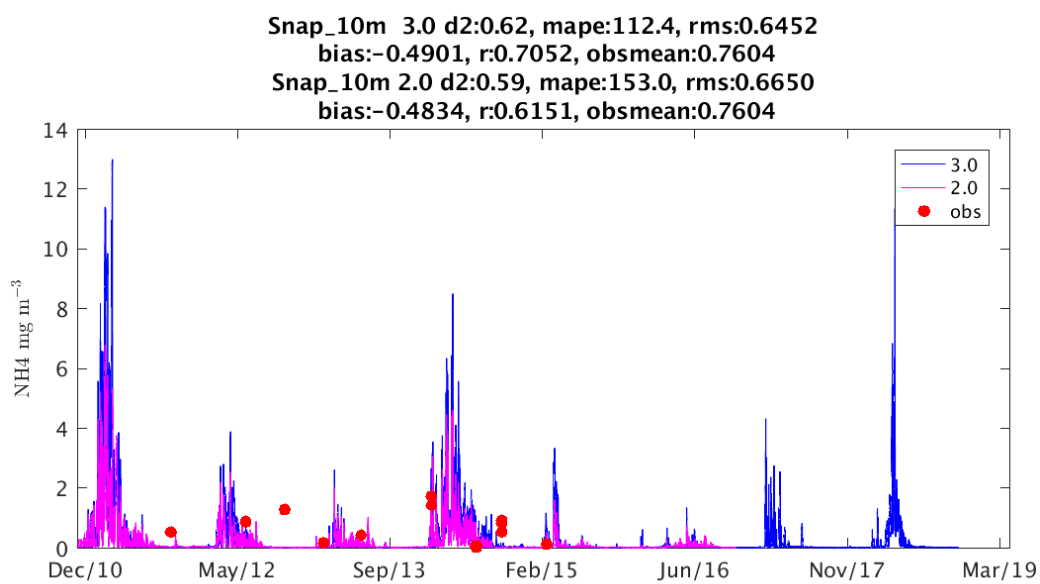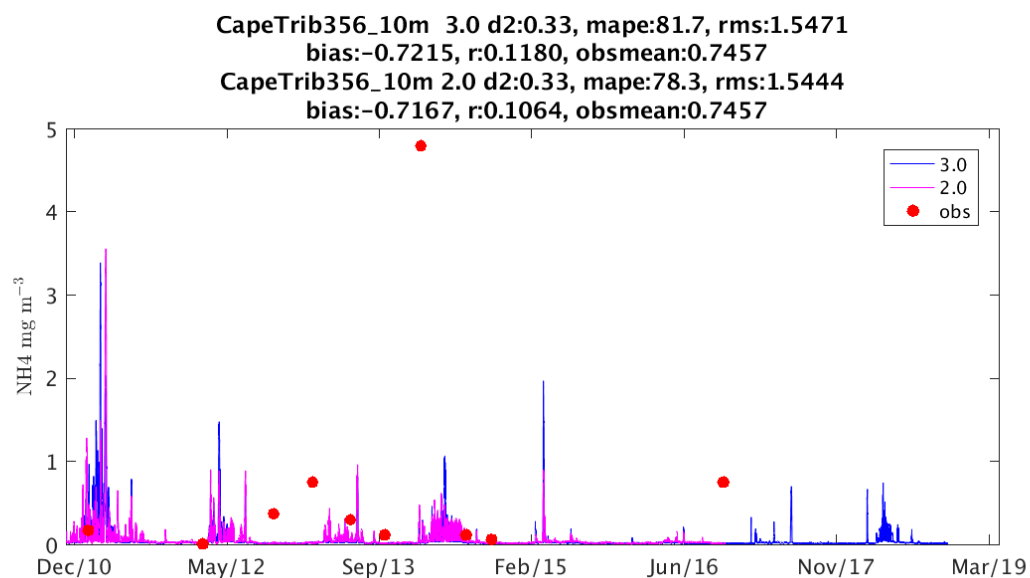

## 15. Simulated DON assessment against Long Term Monitoring

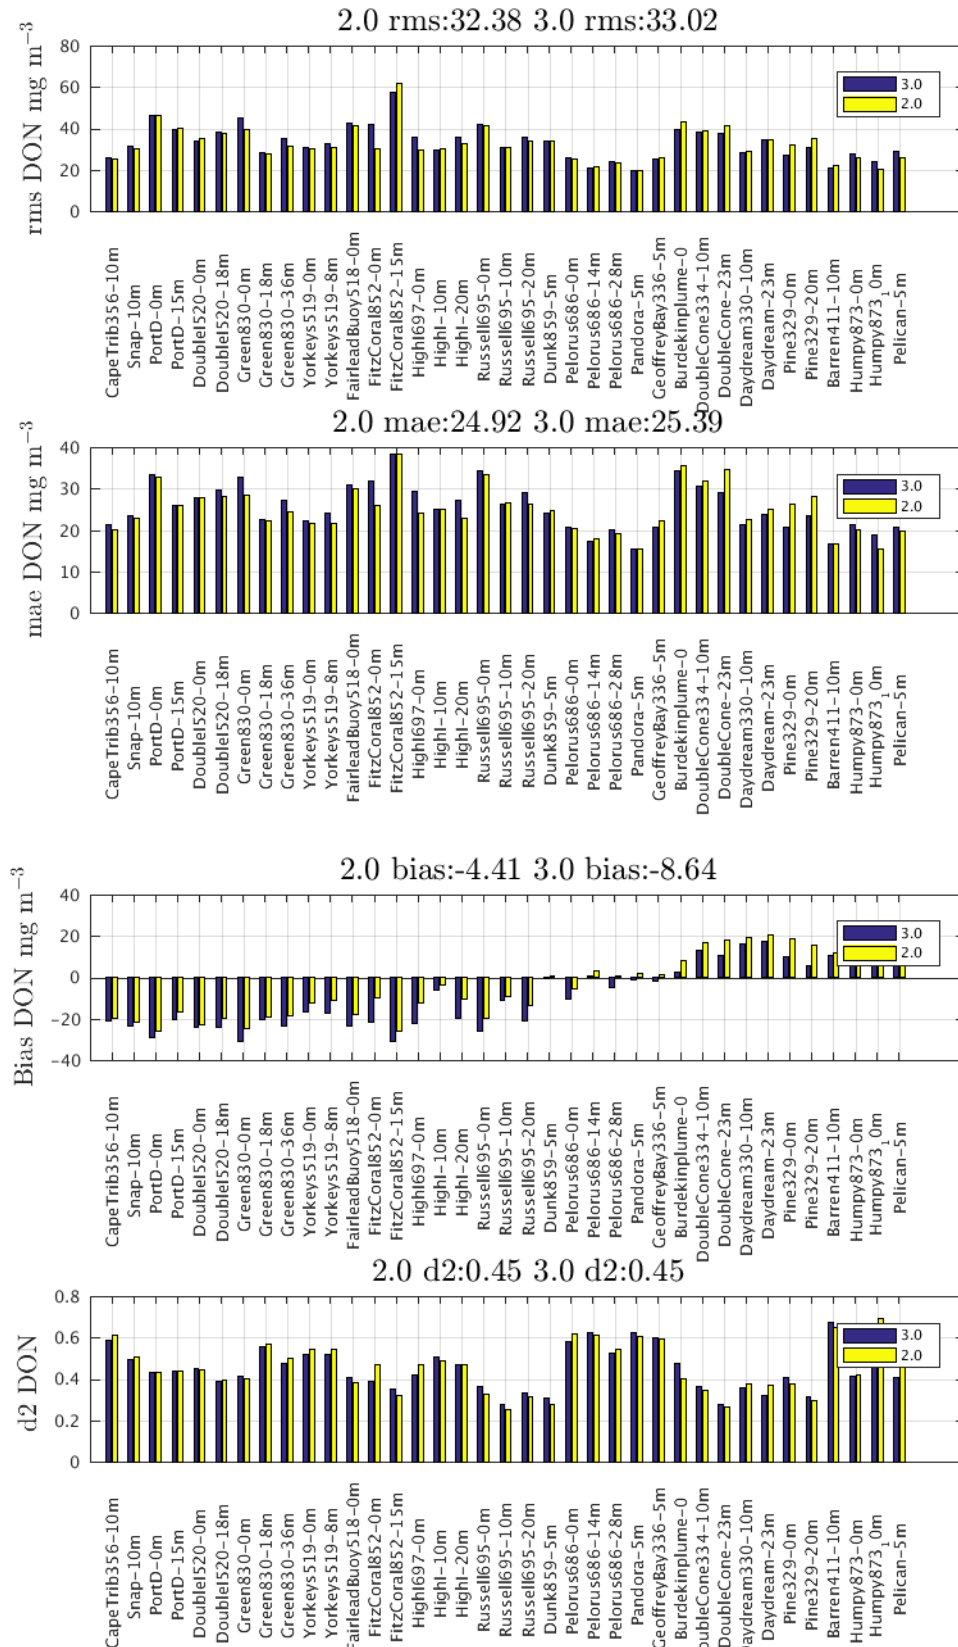

Figure 10 Metrics for Long Term Monitoring sites DON assessment against observations for model version 3p0 and 2p0 d2 = Willmott index see Statistical metric page 27.mae:mean absolute error, rms root mean square

Pelican\_5m 3.0 d2:0.41, mape:22.5, rms:28.8852  
 bias:17.3420, r:0.3556, obsmean:93.6608  
 Pelican\_5m 2.0 d2:0.46, mape:21.7, rms:25.9921  
 bias:17.6611, r:0.4222, obsmean:93.6608

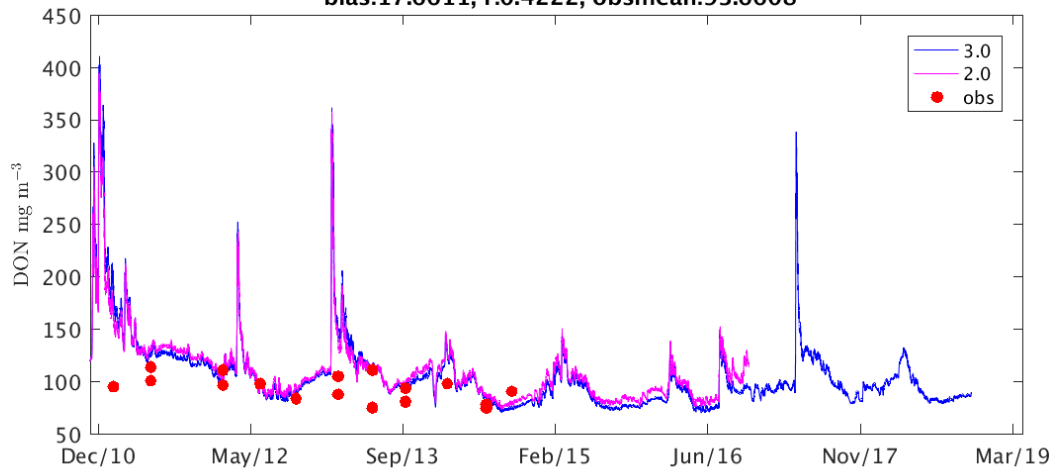

Humpy873\_10m 3.0 d2:0.67, mape:22.0, rms:23.8206  
 bias:10.7781, r:0.4829, obsmean:91.6309  
 Humpy873\_10m 2.0 d2:0.69, mape:18.5, rms:20.0697  
 bias:8.9800, r:0.4986, obsmean:91.6309

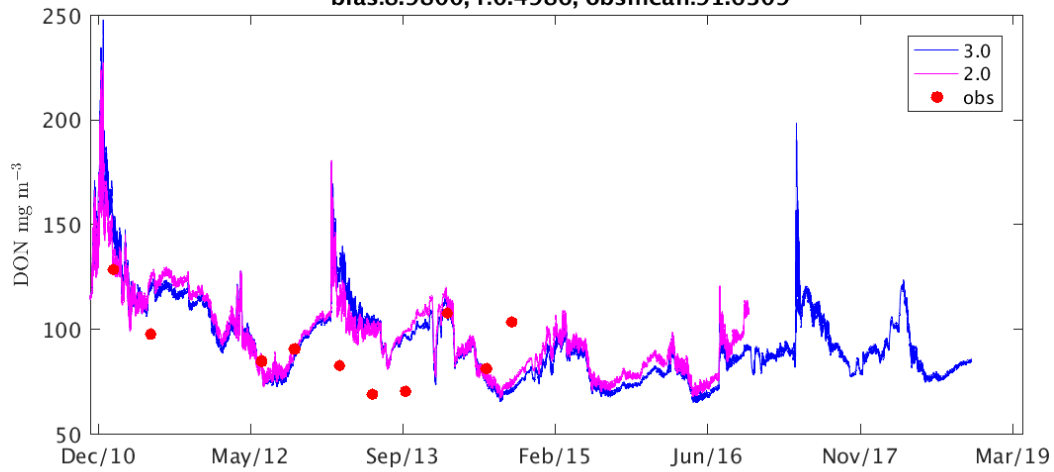

Humpy873\_0m 3.0 d2:0.41, mape:26.1, rms:27.8723  
 bias:19.1030, r:0.3453, obsmean:83.7534  
 Humpy873\_0m 2.0 d2:0.42, mape:24.9, rms:25.8009  
 bias:18.4617, r:0.2536, obsmean:83.7534

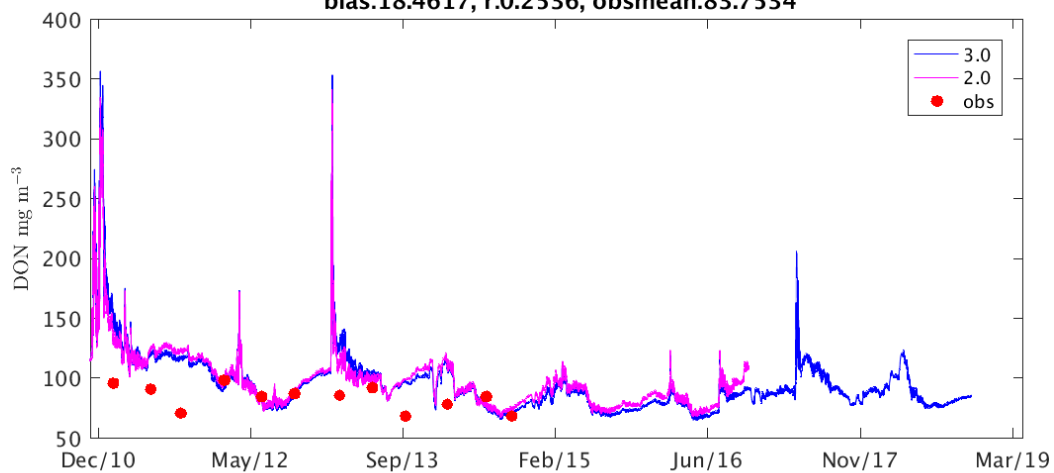



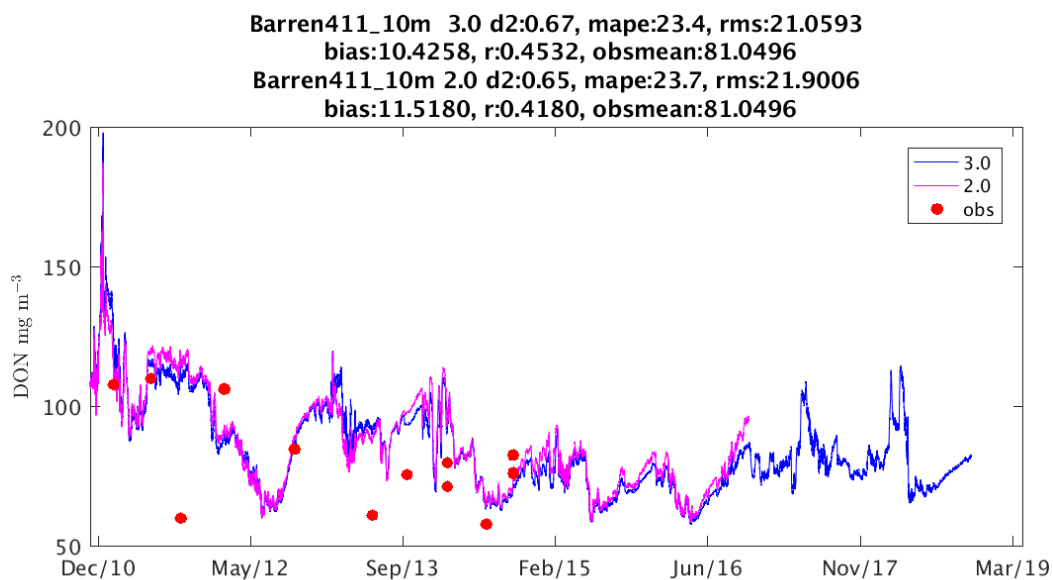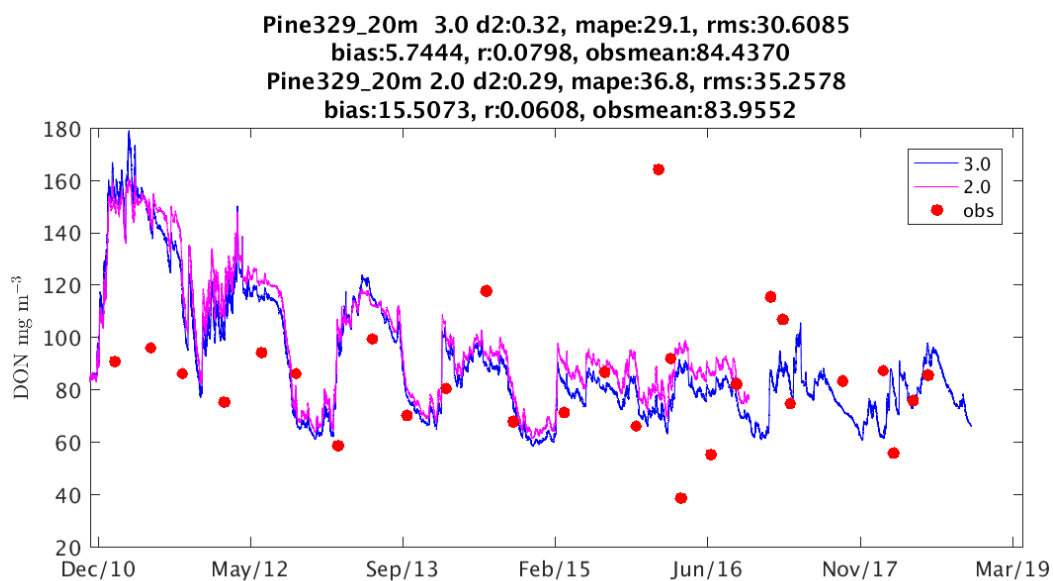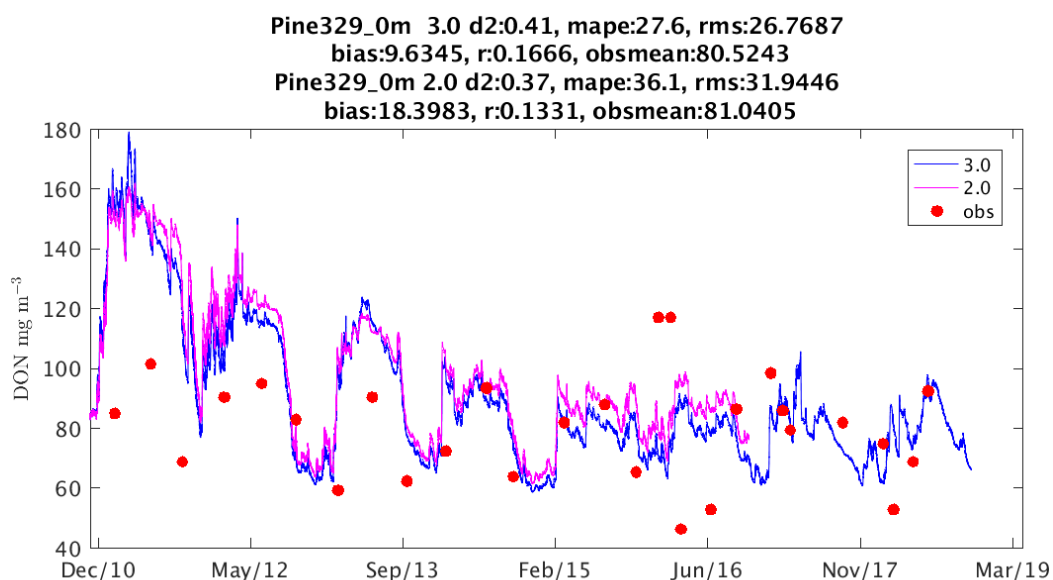

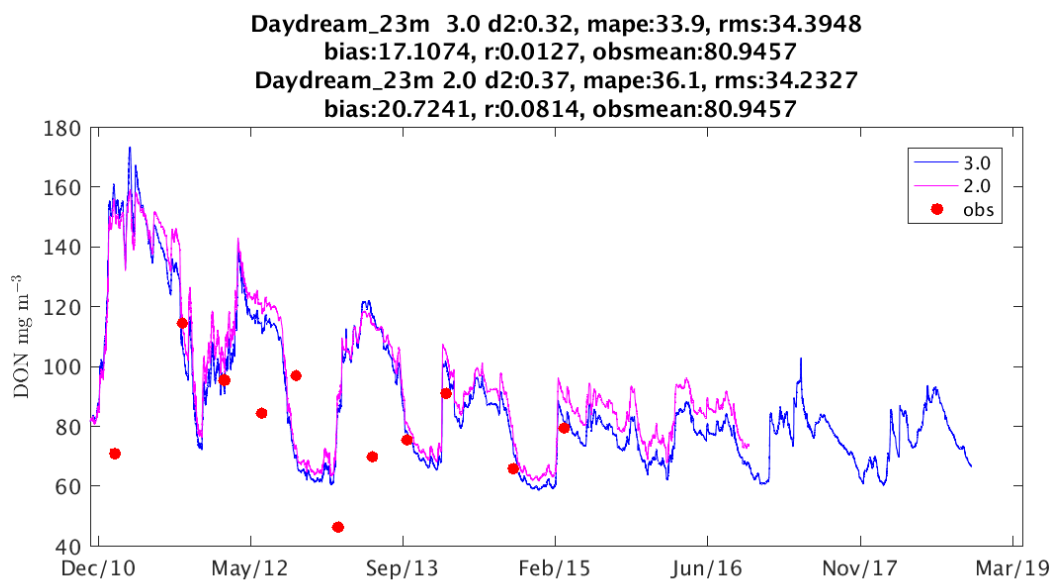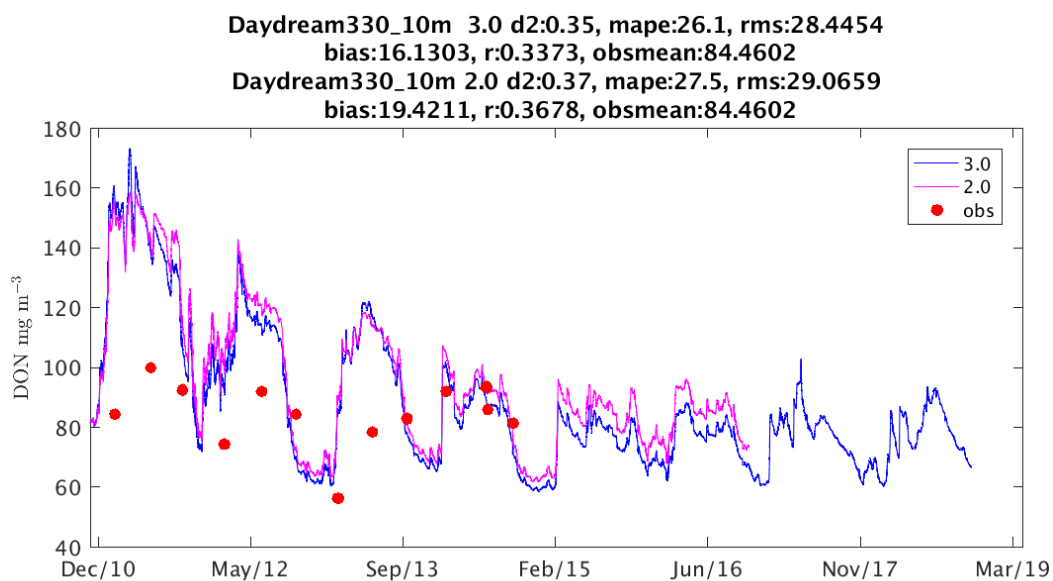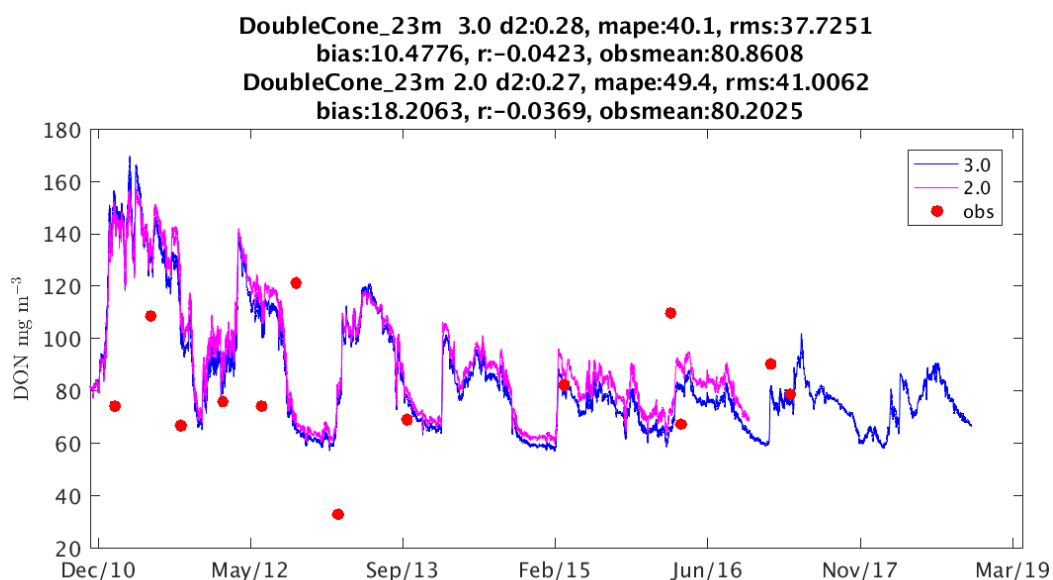

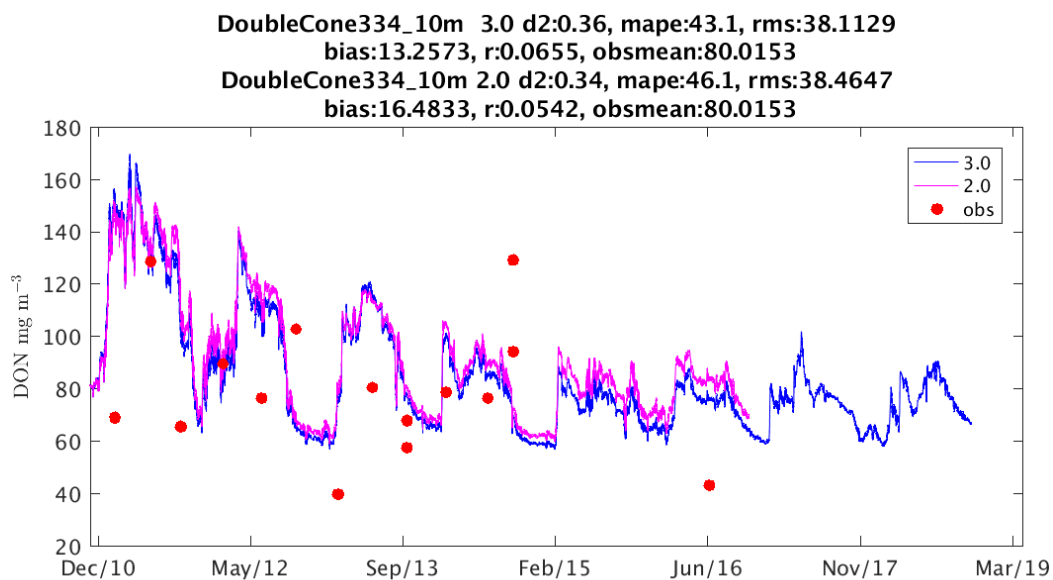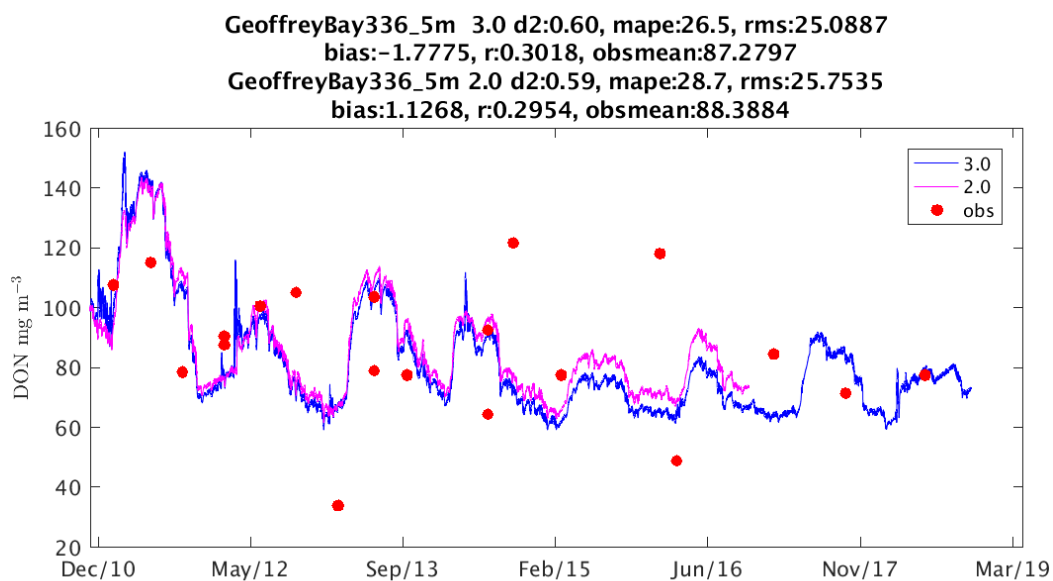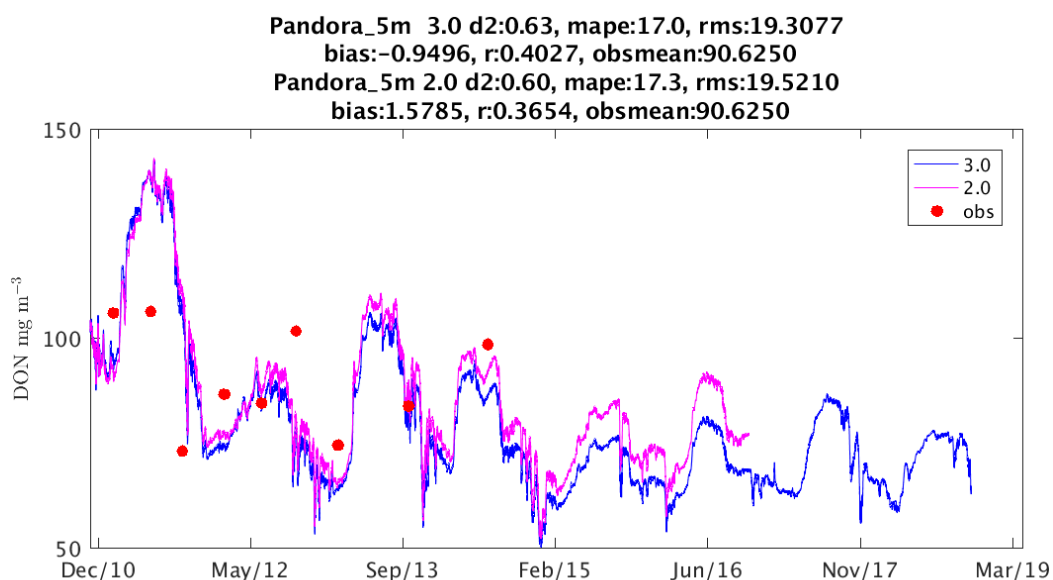

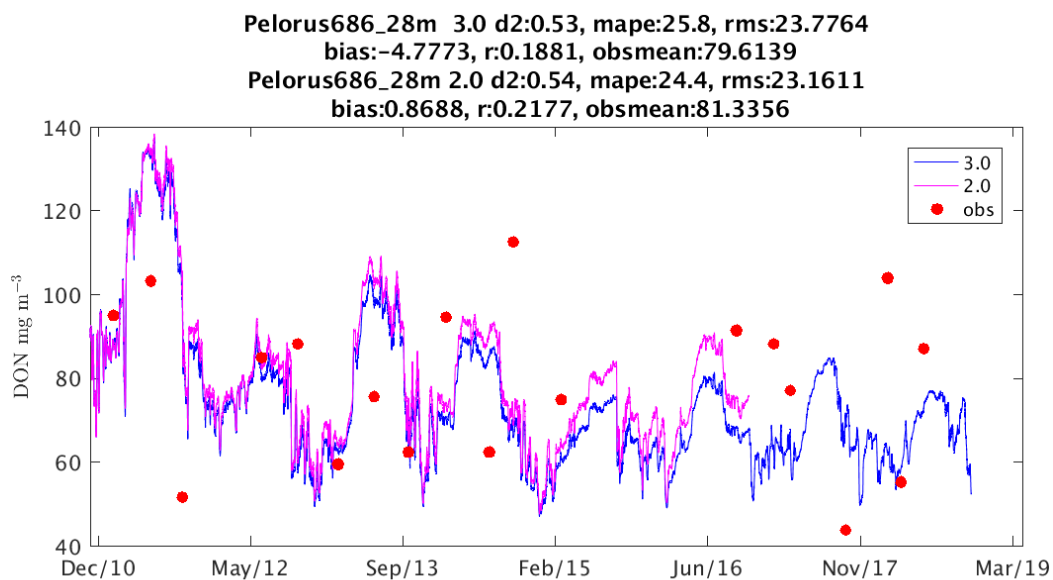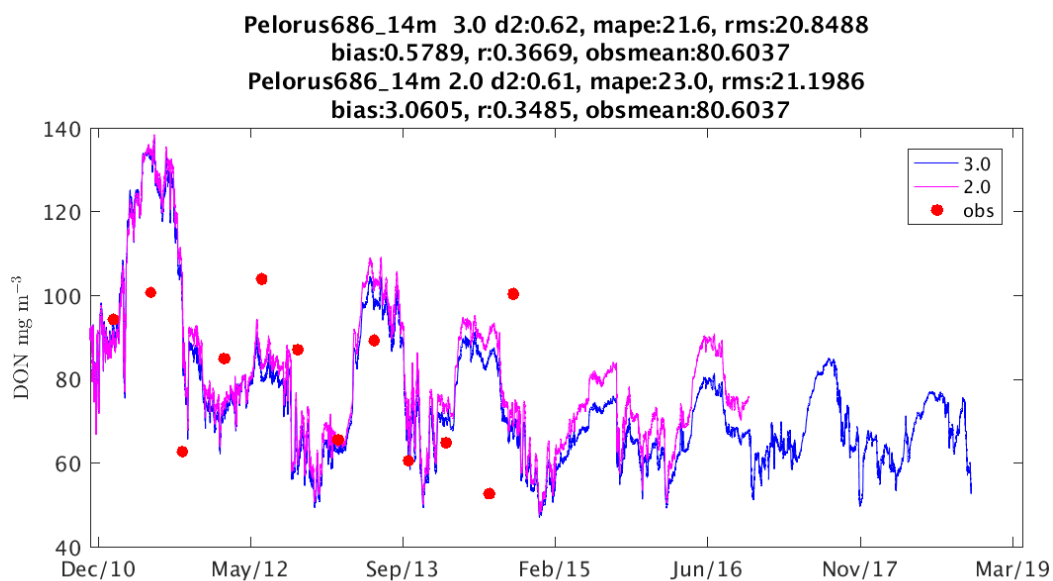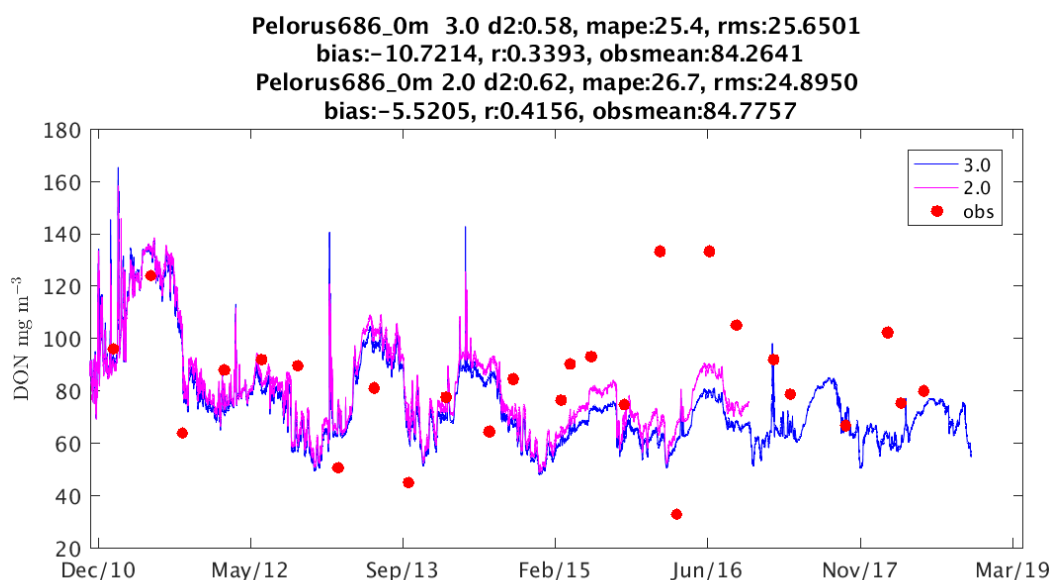

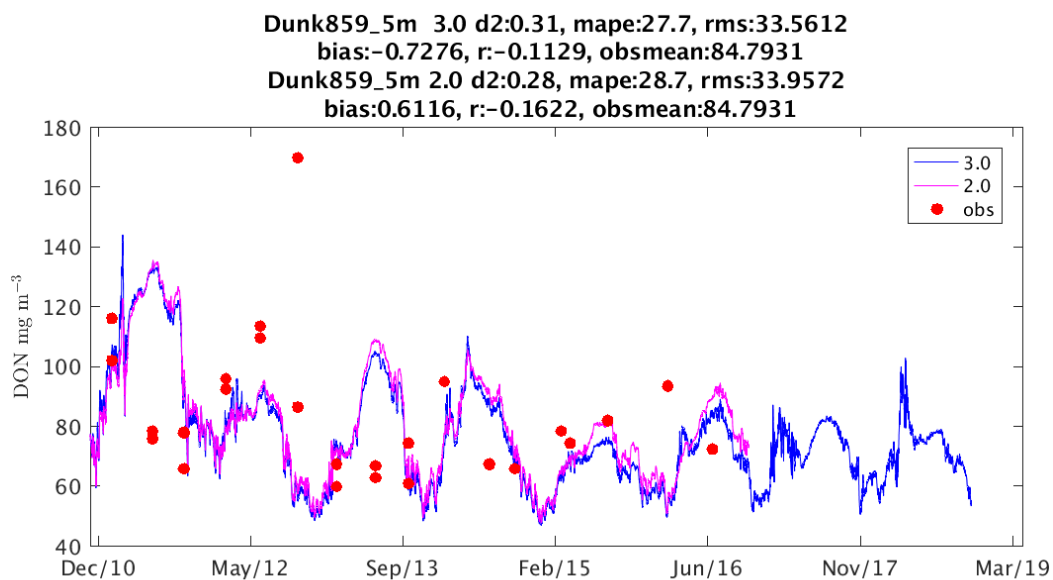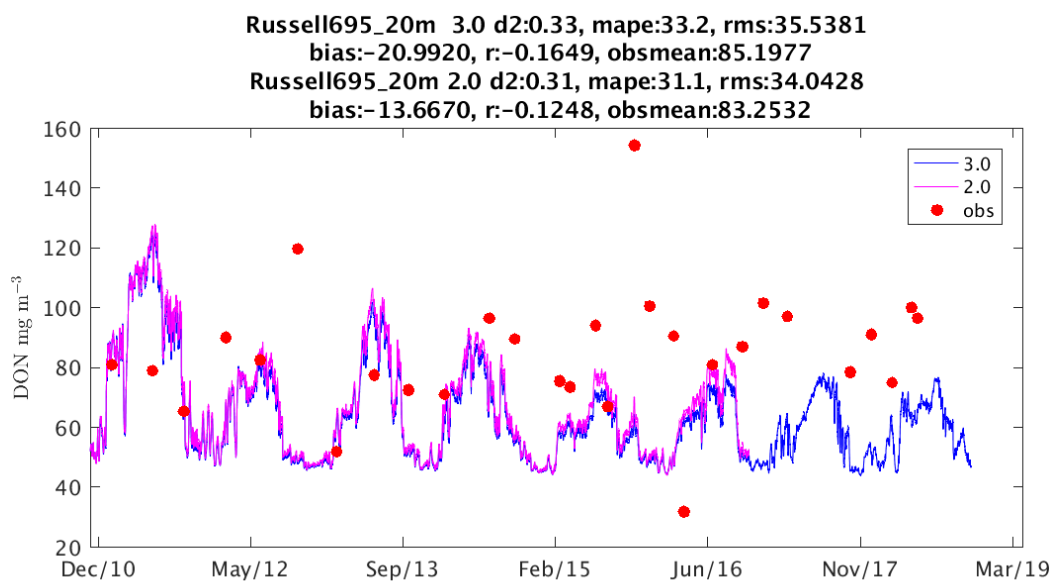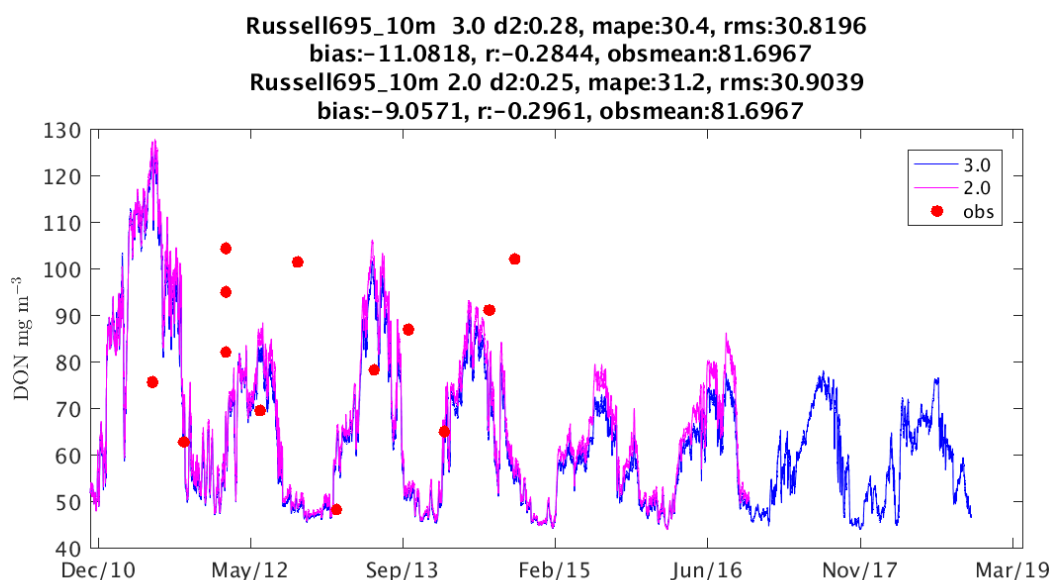

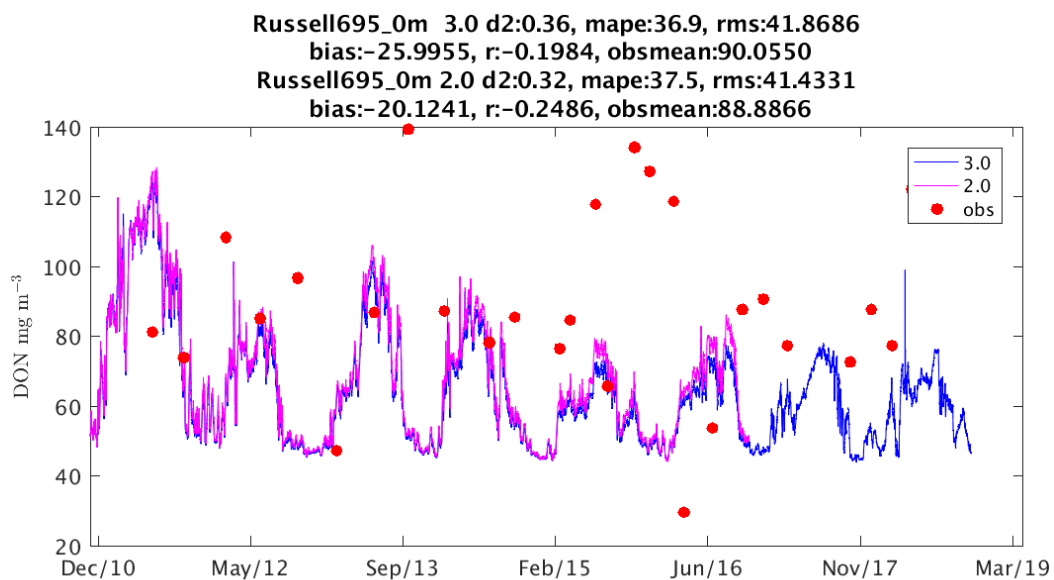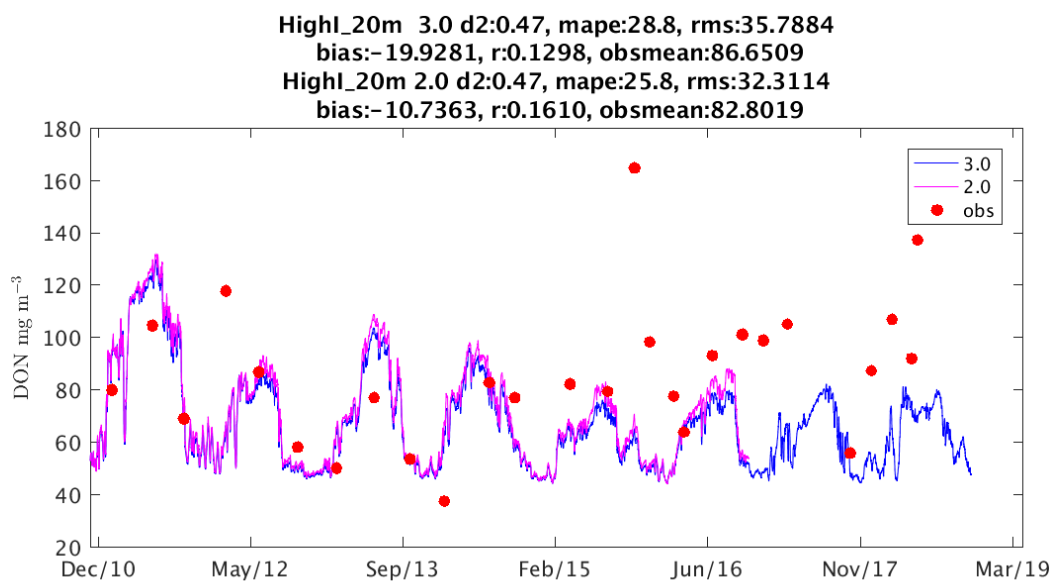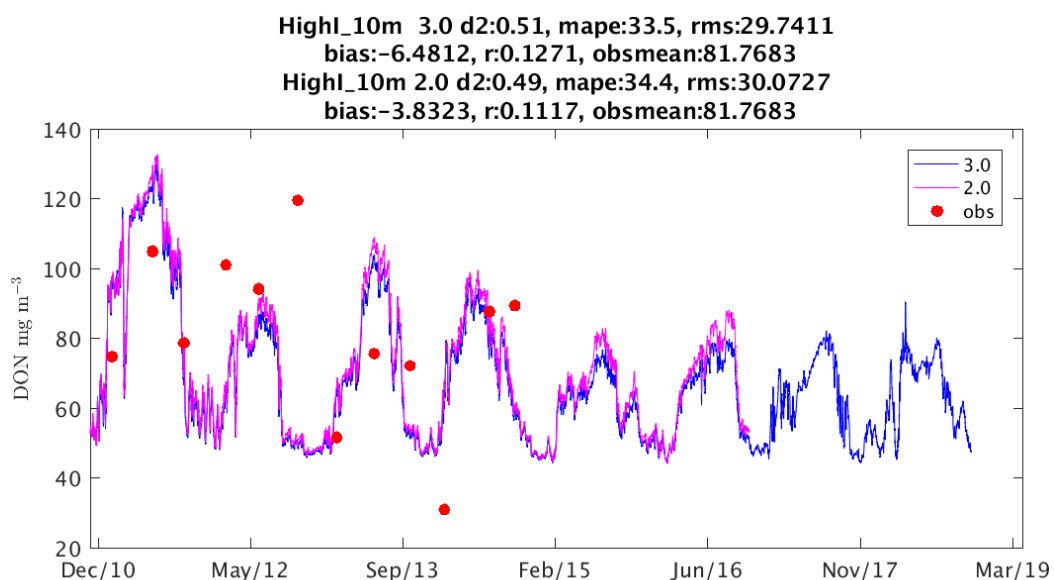

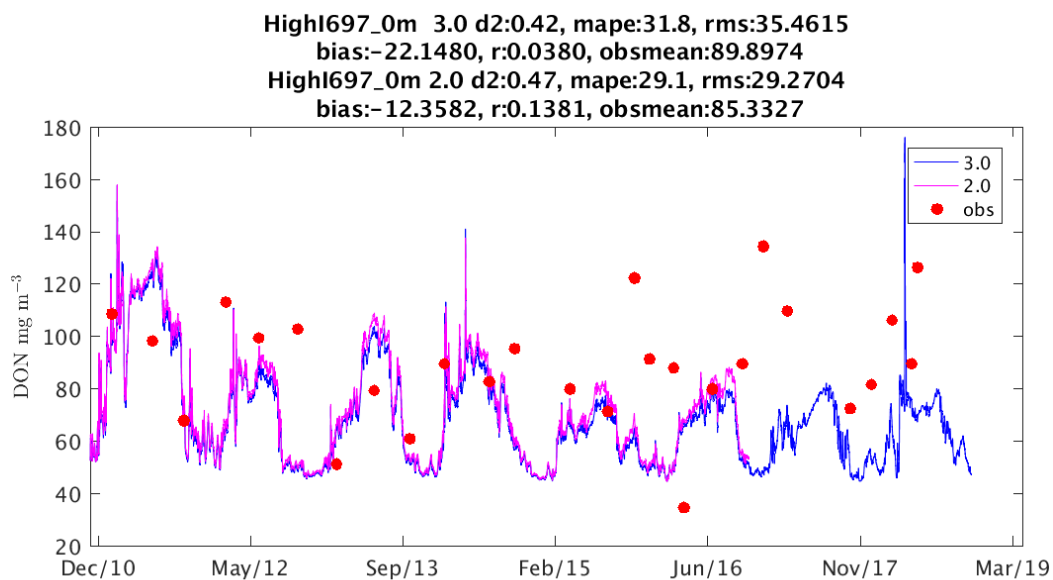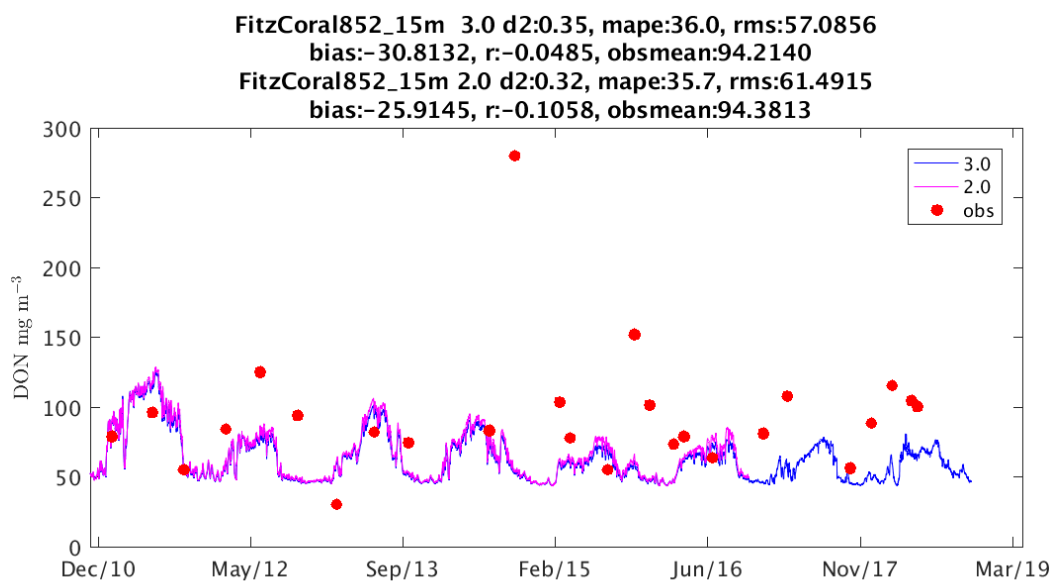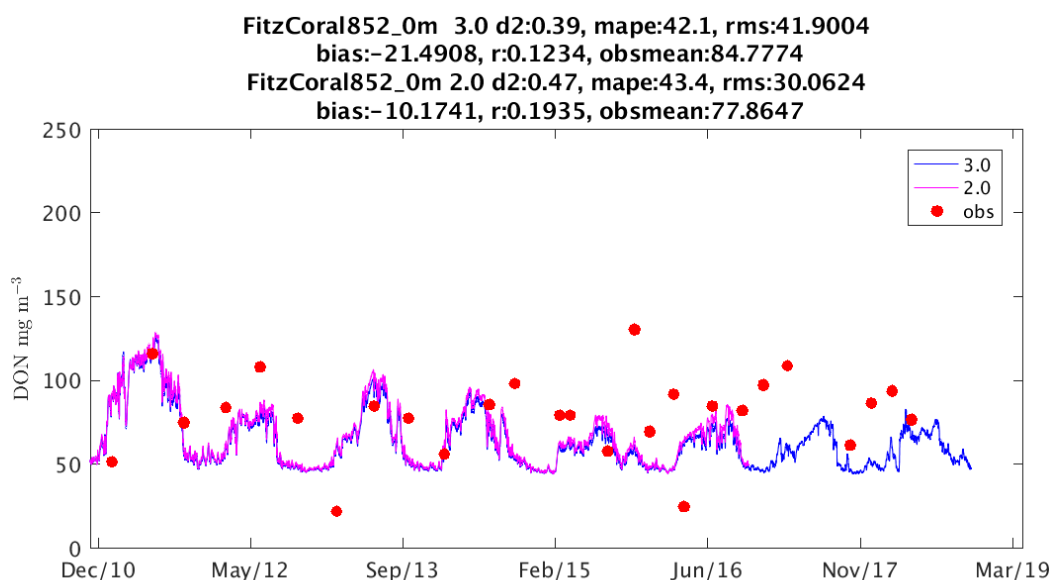

FairleadBuoy518\_0m 3.0 d2:0.40, mape:29.8, rms:42.2591  
 bias:-23.2919, r:-0.1050, obsmean:90.4248  
 FairleadBuoy518\_0m 2.0 d2:0.38, mape:29.4, rms:41.1393  
 bias:-18.2599, r:-0.0917, obsmean:90.5157

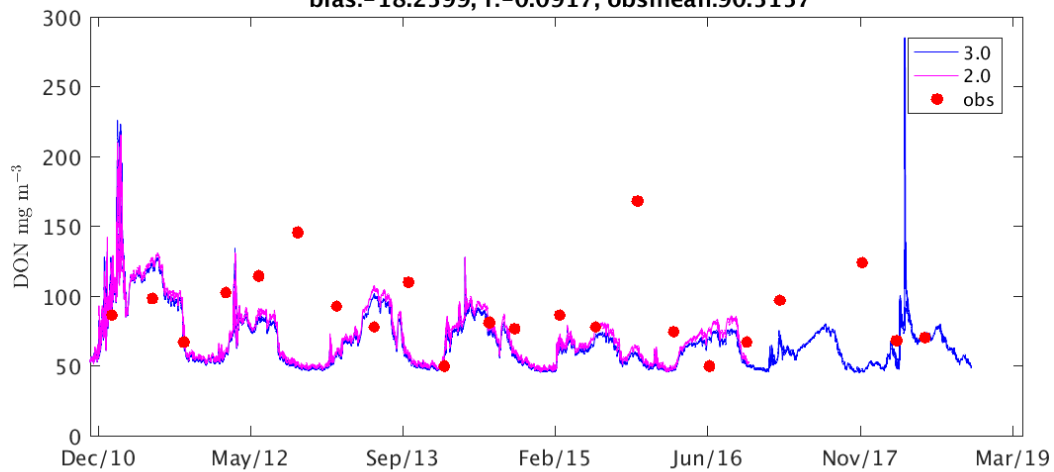

Yorkeys519\_8m 3.0 d2:0.52, mape:26.8, rms:32.6685  
 bias:-17.1162, r:0.2130, obsmean:83.1736  
 Yorkeys519\_8m 2.0 d2:0.54, mape:25.1, rms:30.4703  
 bias:-11.0007, r:0.2483, obsmean:82.3493

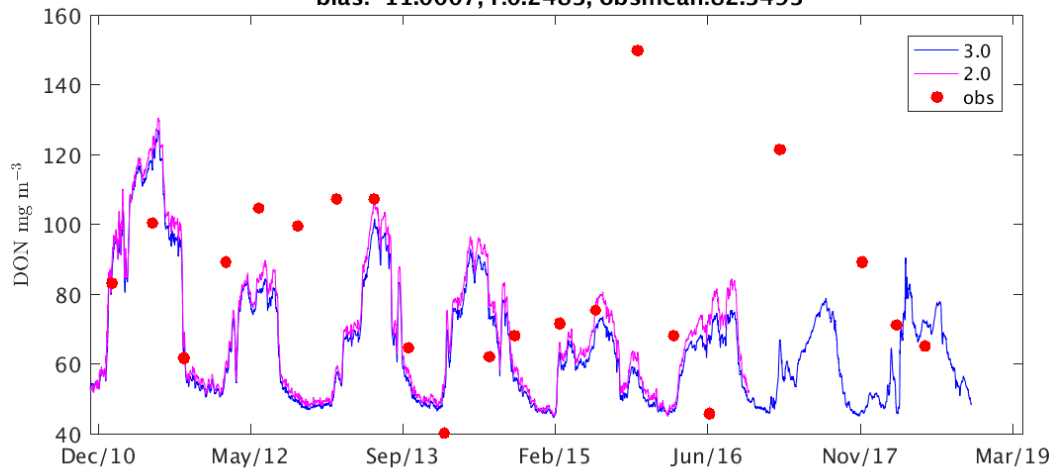

Yorkeys519\_0m 3.0 d2:0.52, mape:25.9, rms:30.4519  
 bias:-16.8809, r:0.2419, obsmean:82.5698  
 Yorkeys519\_0m 2.0 d2:0.54, mape:25.8, rms:30.0757  
 bias:-12.4333, r:0.2520, obsmean:83.0019

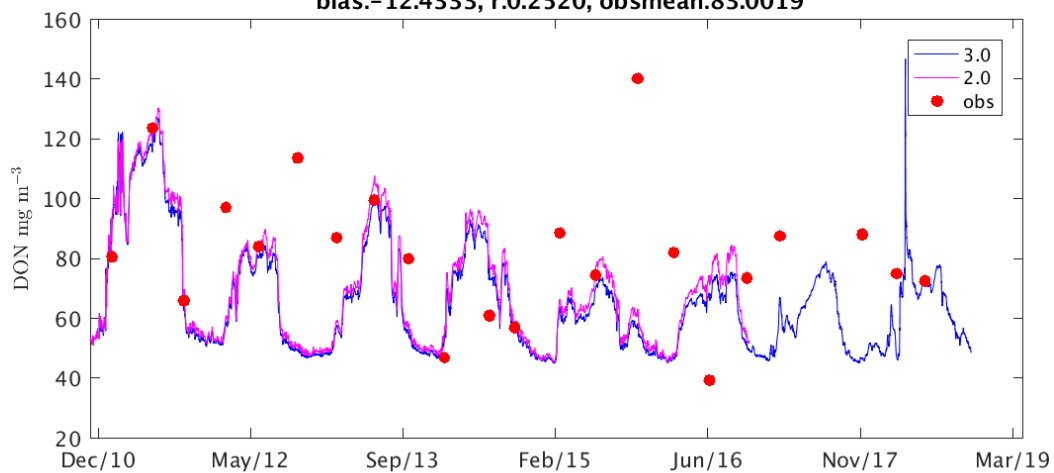



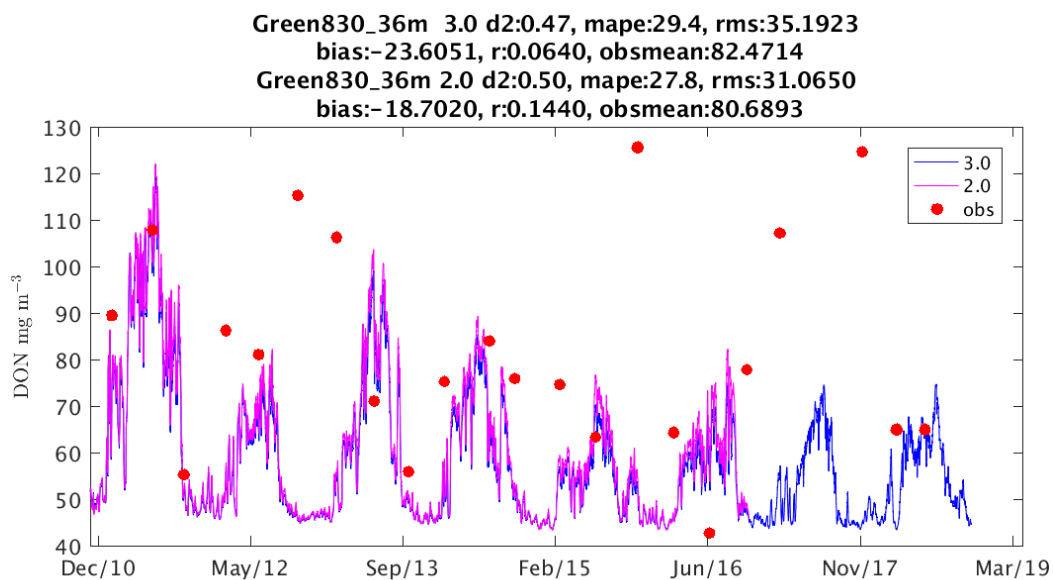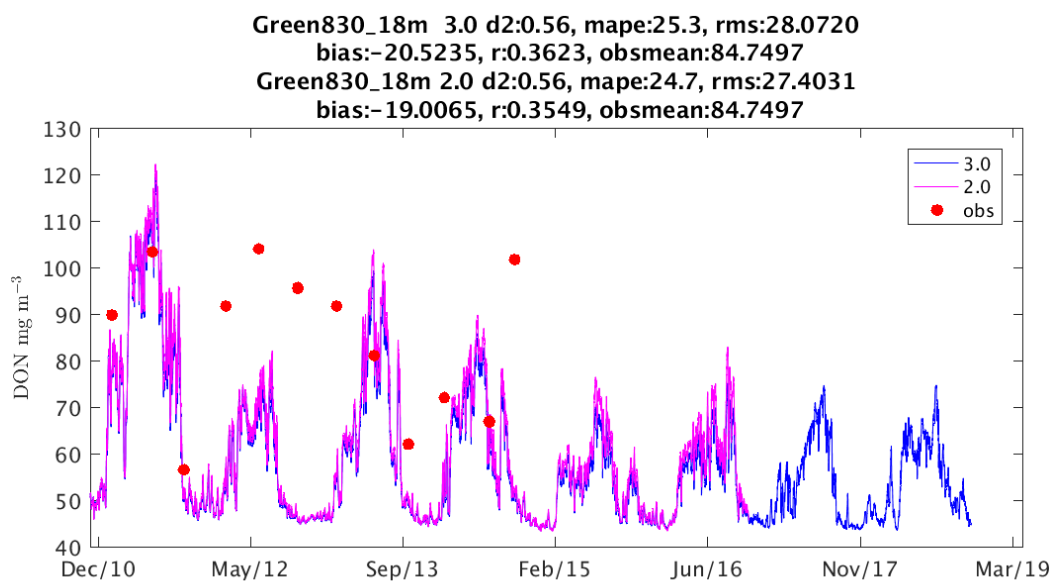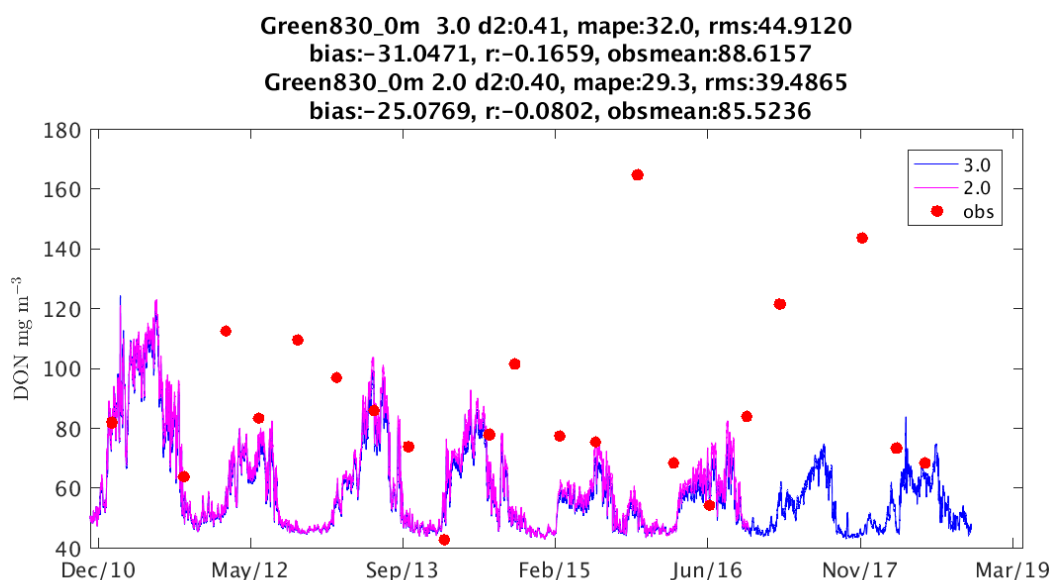

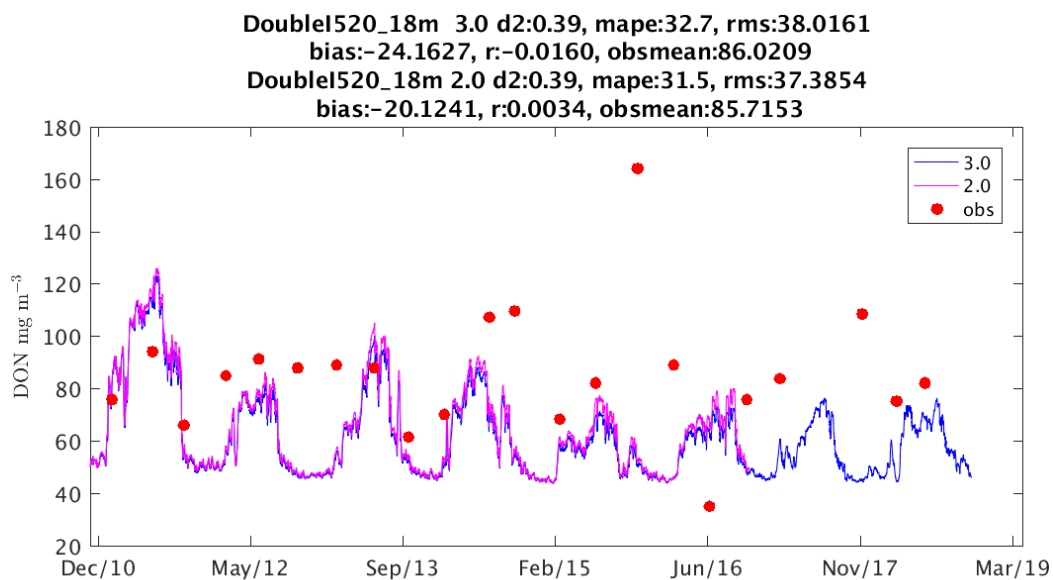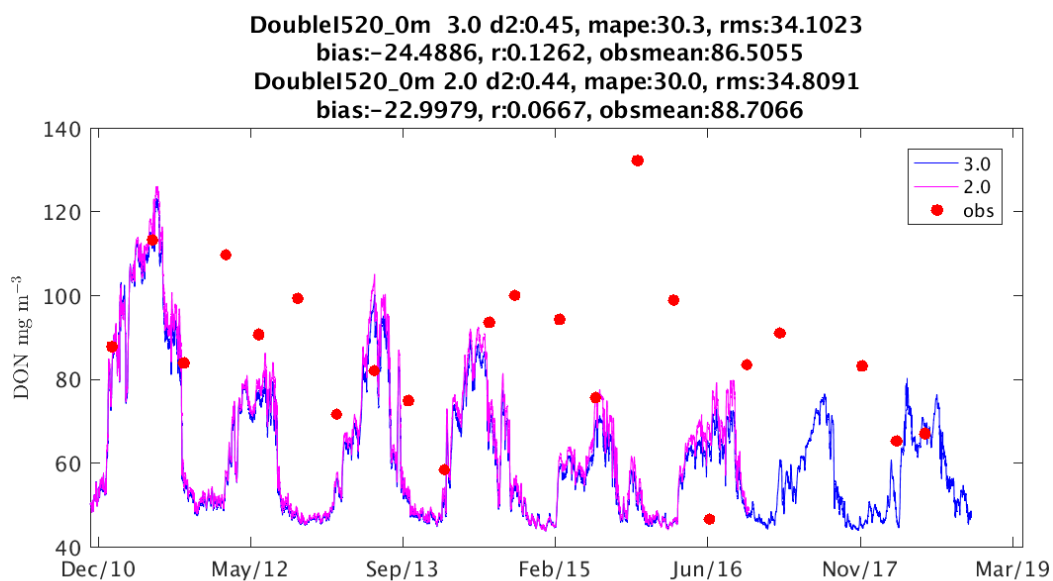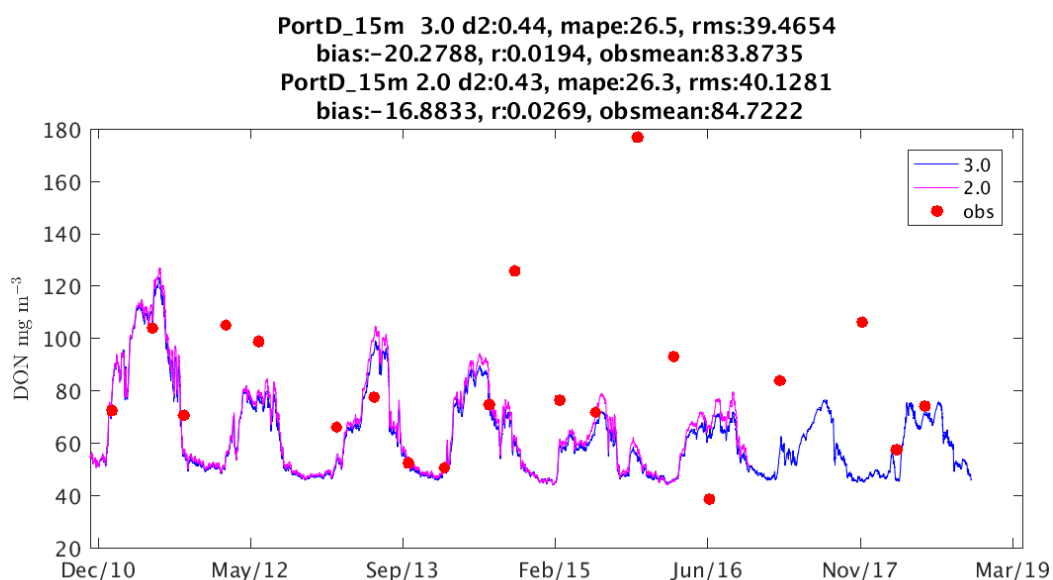

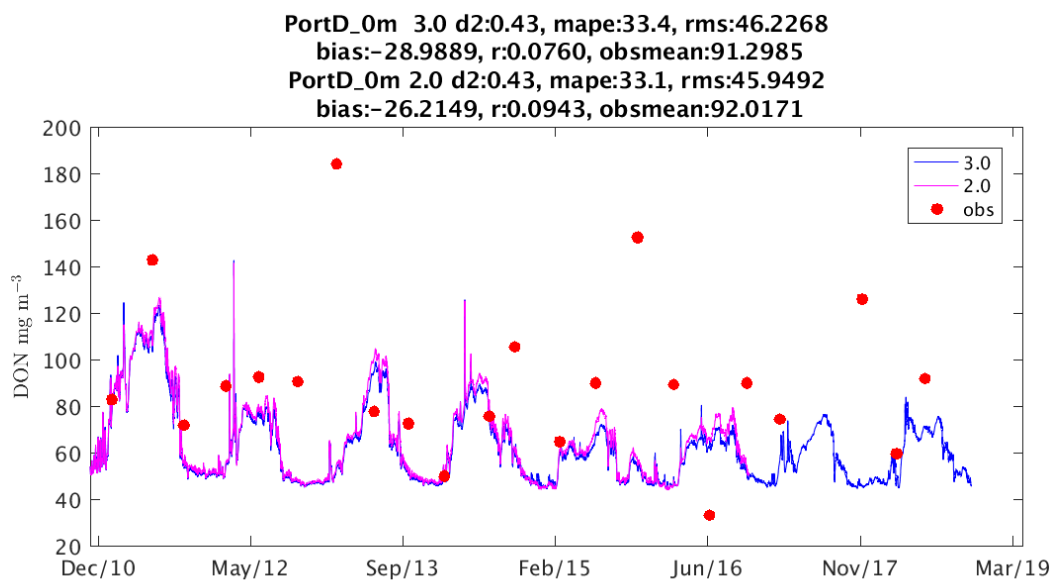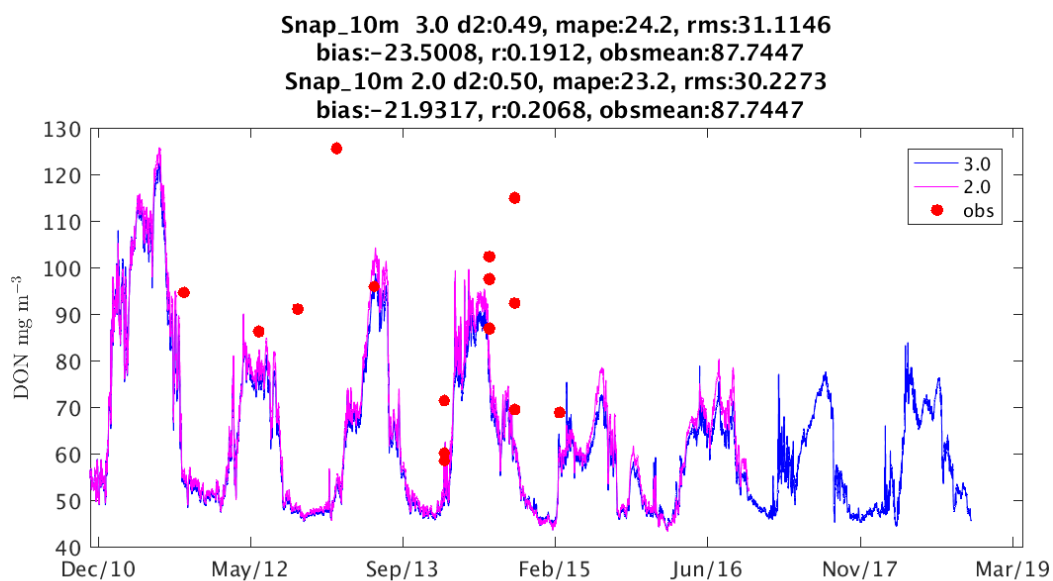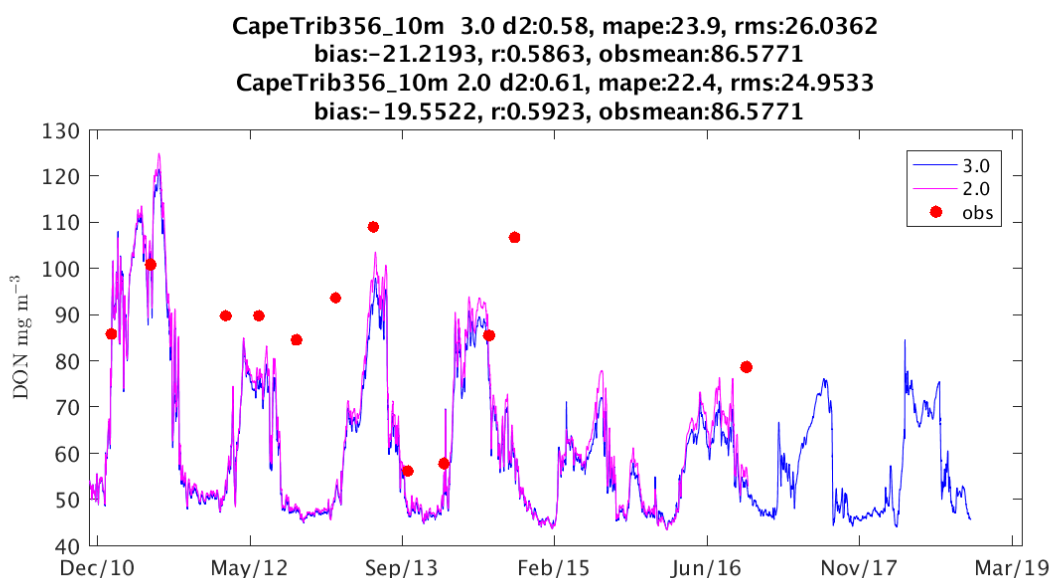

## 16. Simulated DOP assessment against Long Term Monitoring

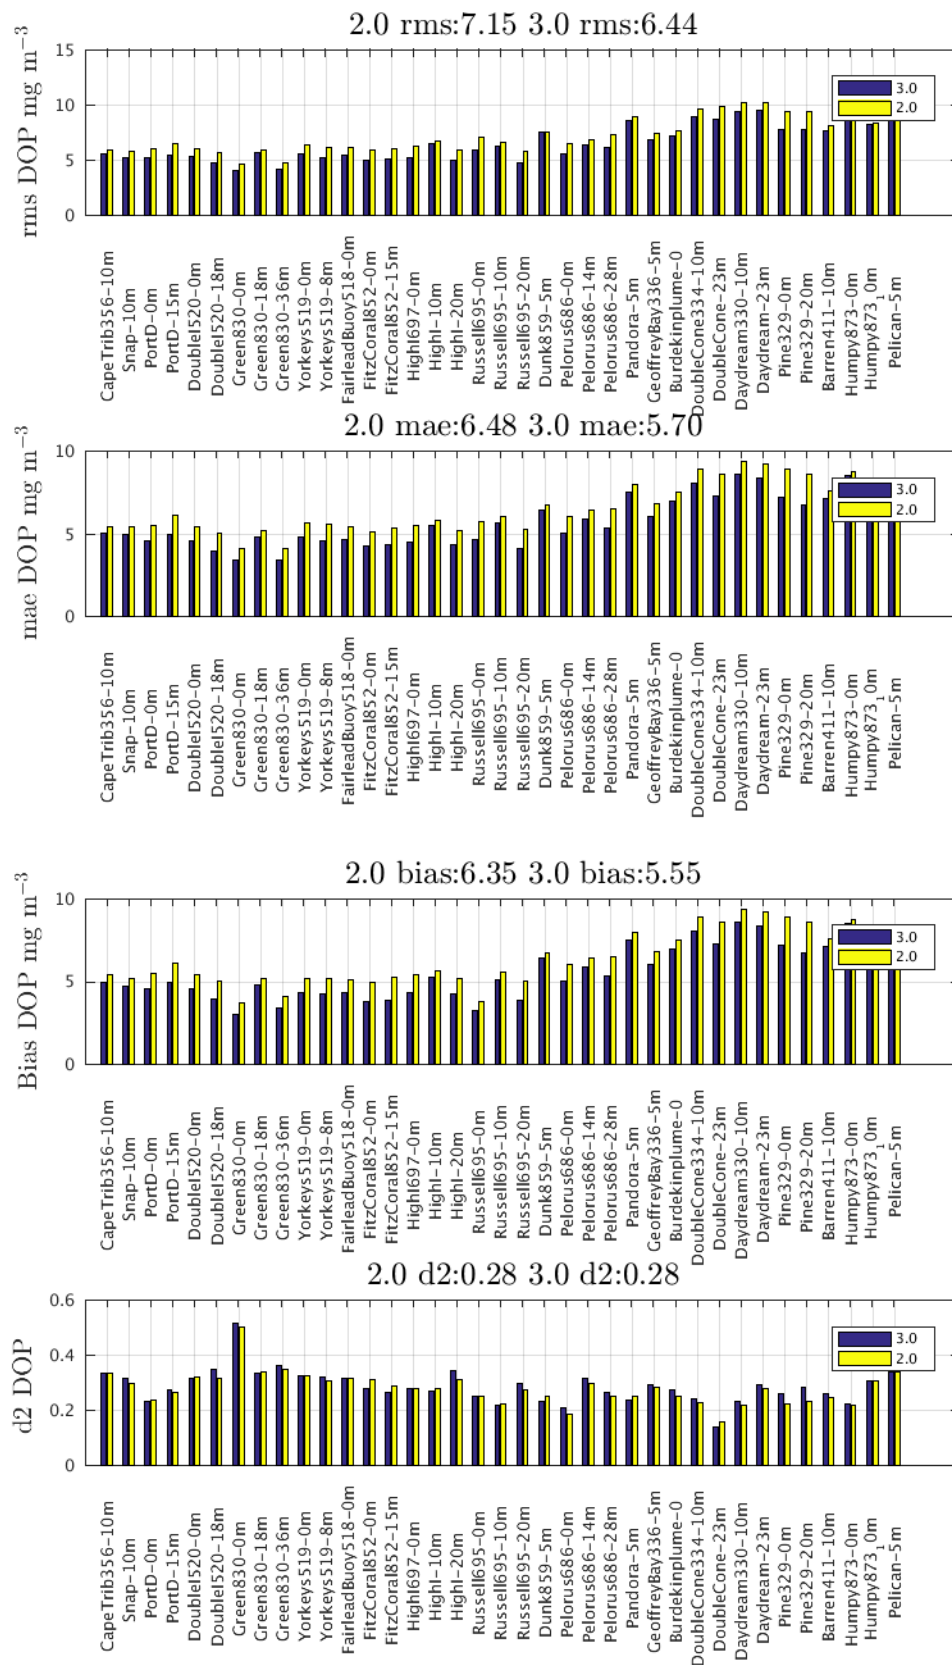

Figure 11 Metrics for Long Term Monitoring sites DOP assessment against observations for model version 3p0 and 2p0 d2 = Willmott index see Statistical metric page 27.mae:mean absolute error, rms root mean square

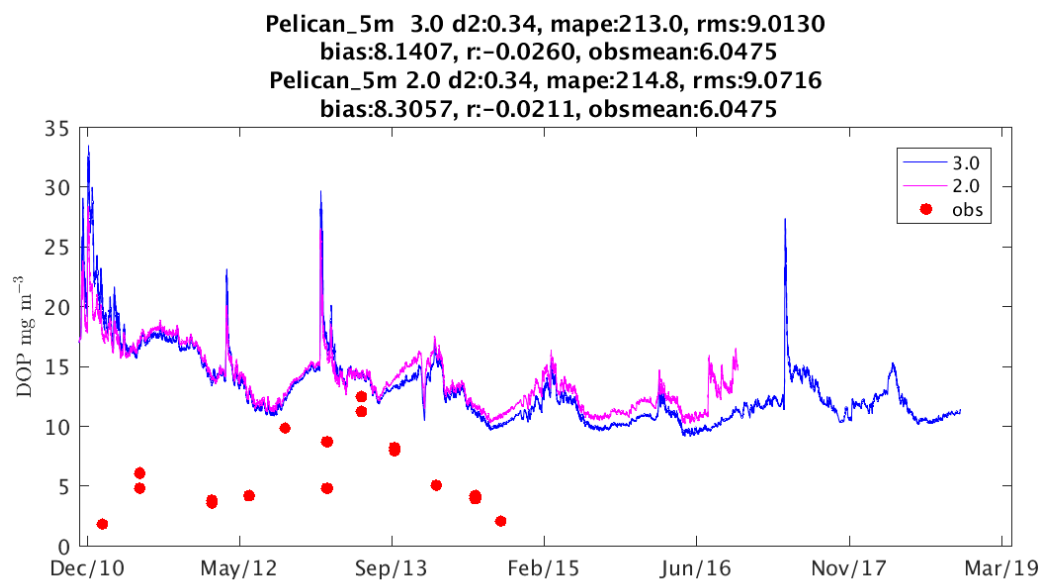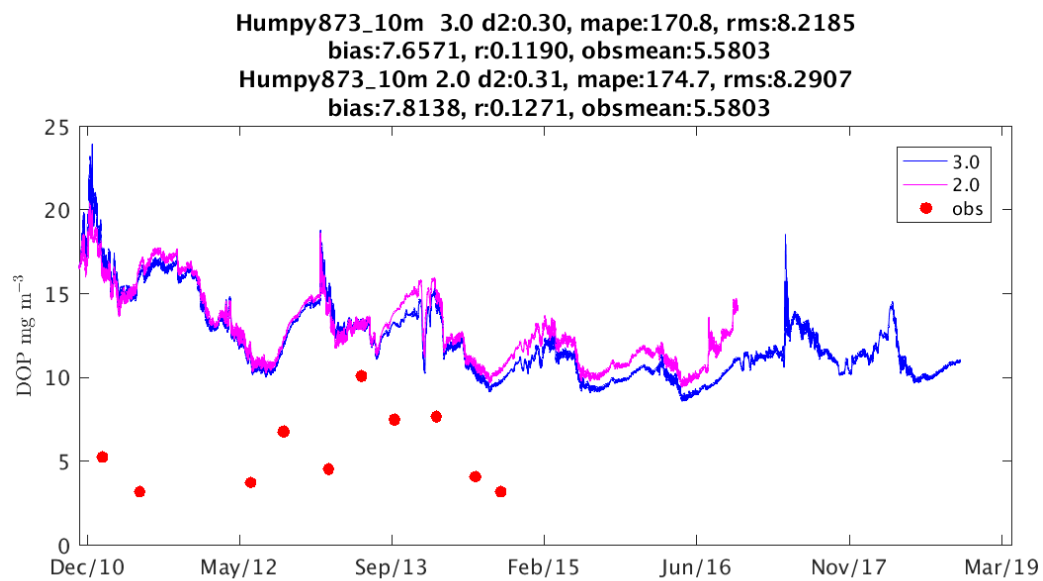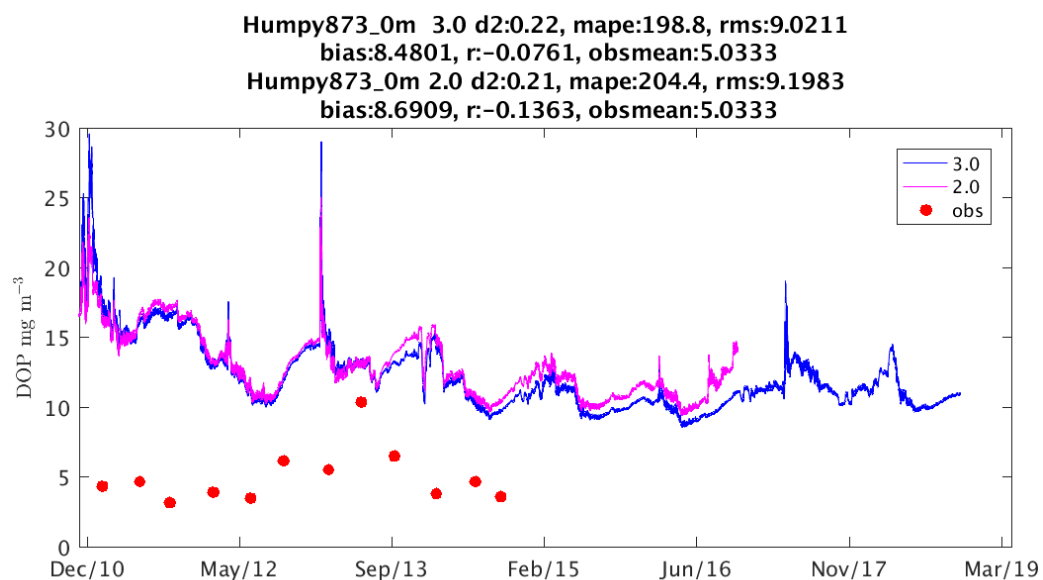

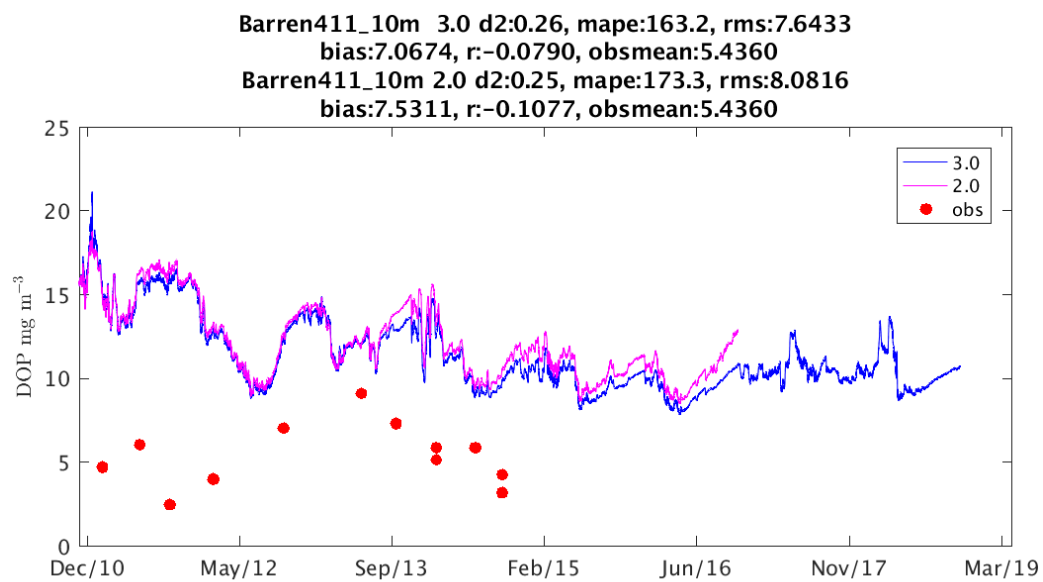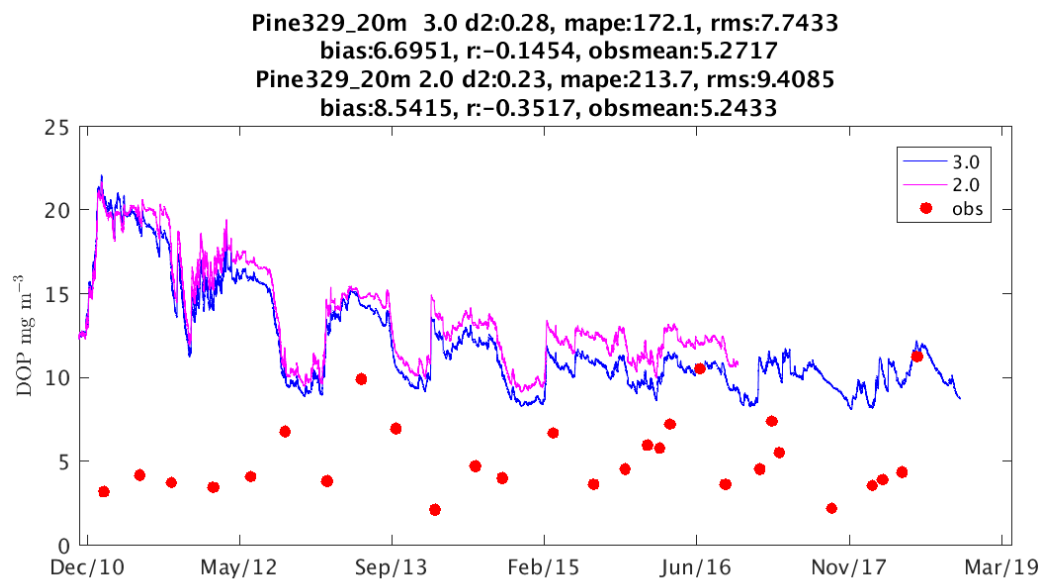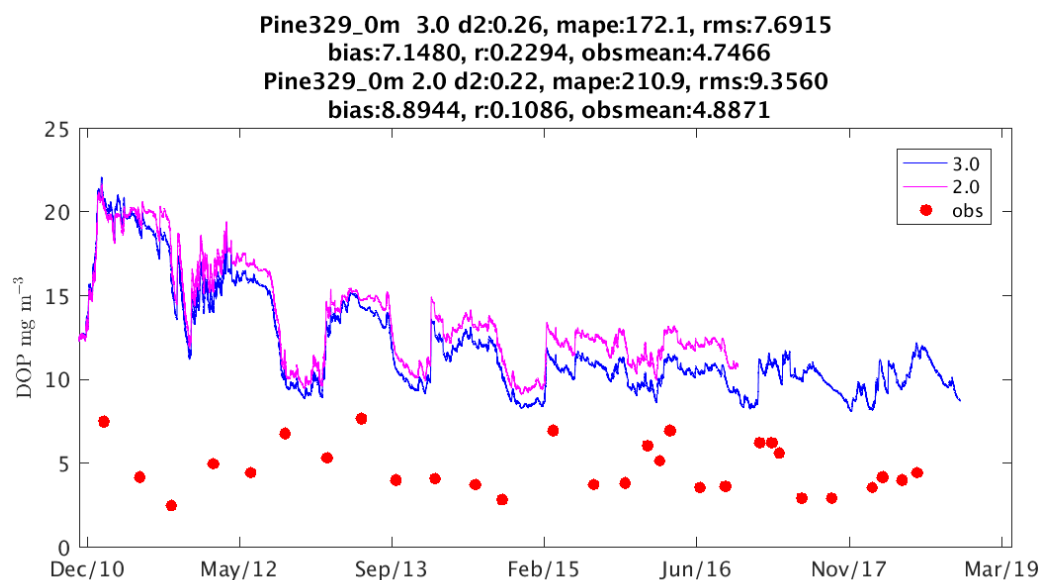

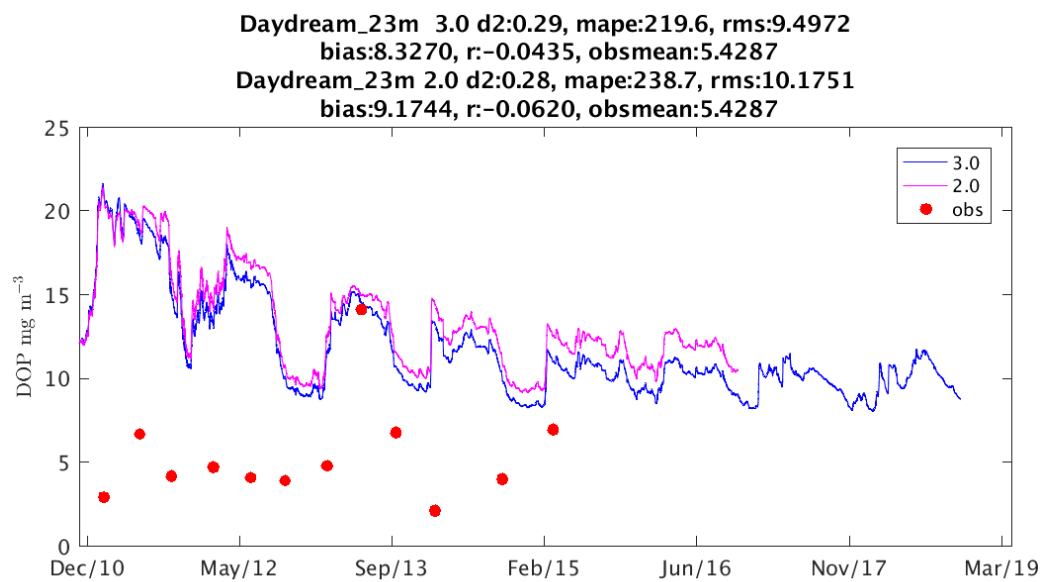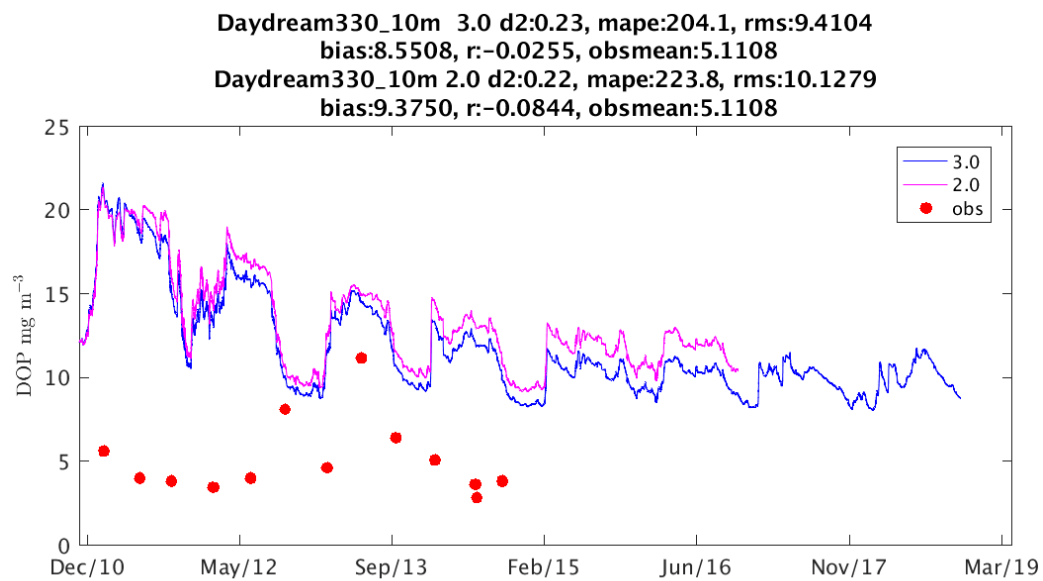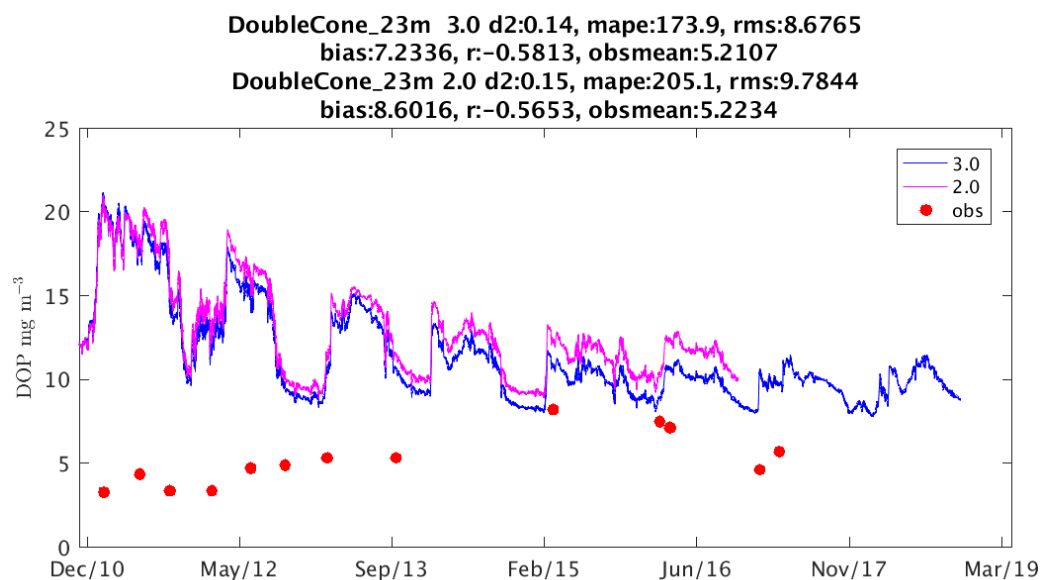

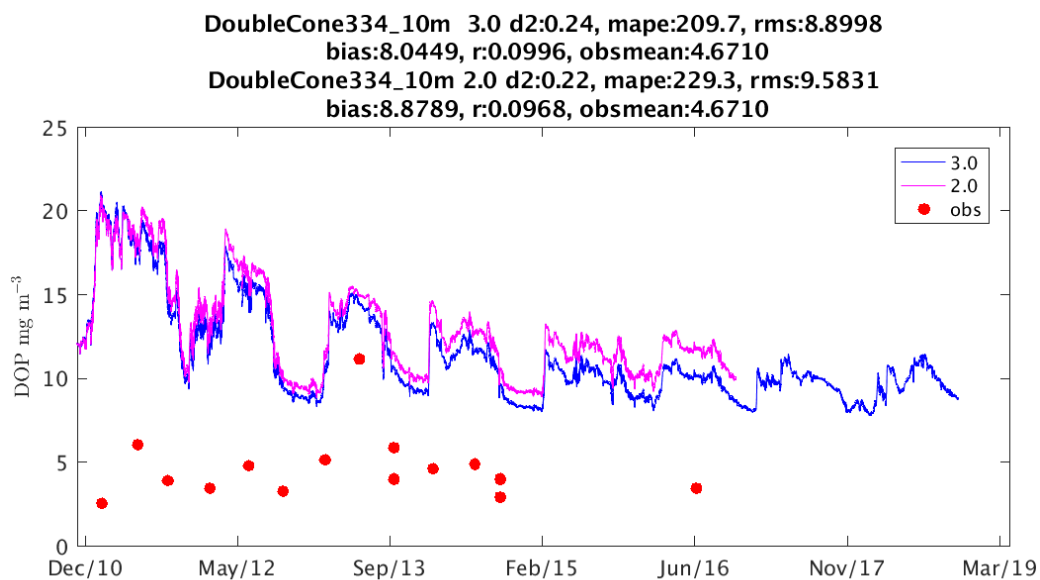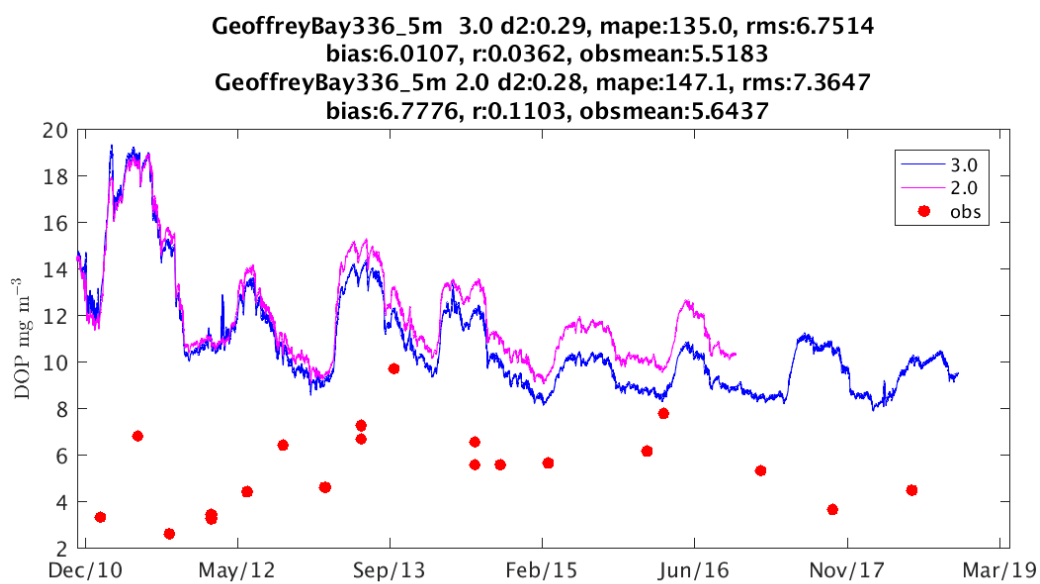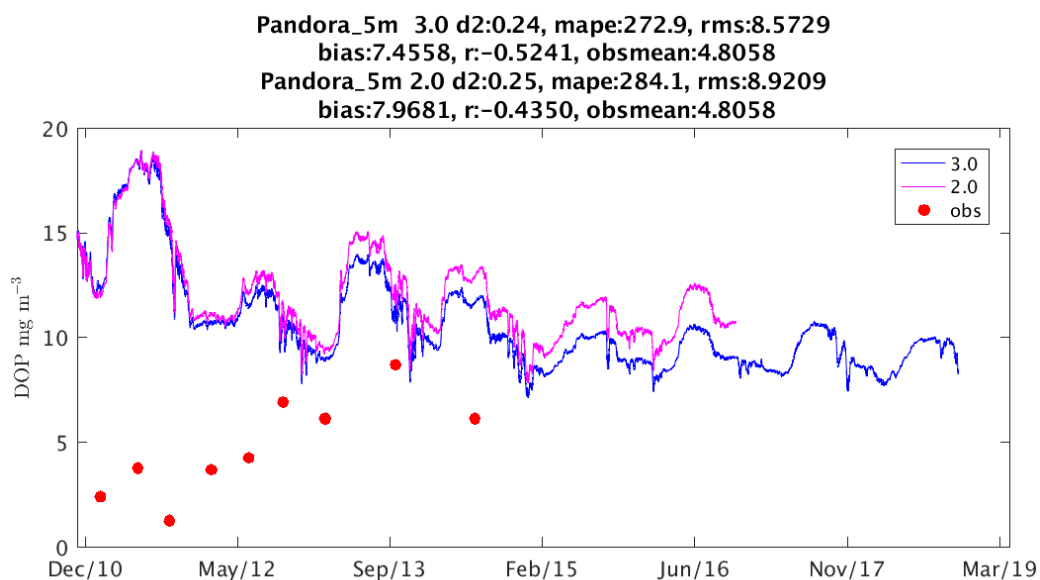



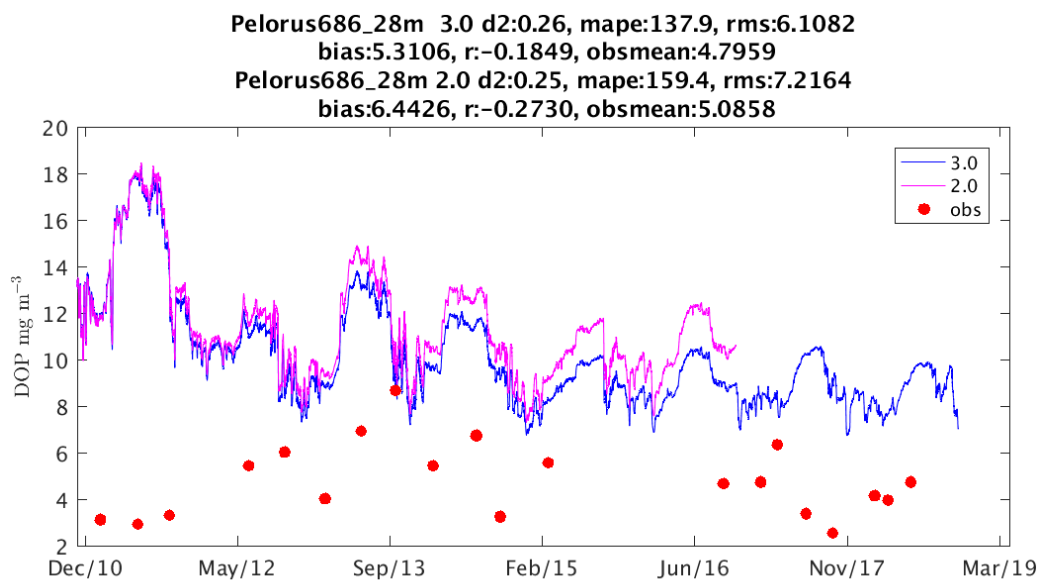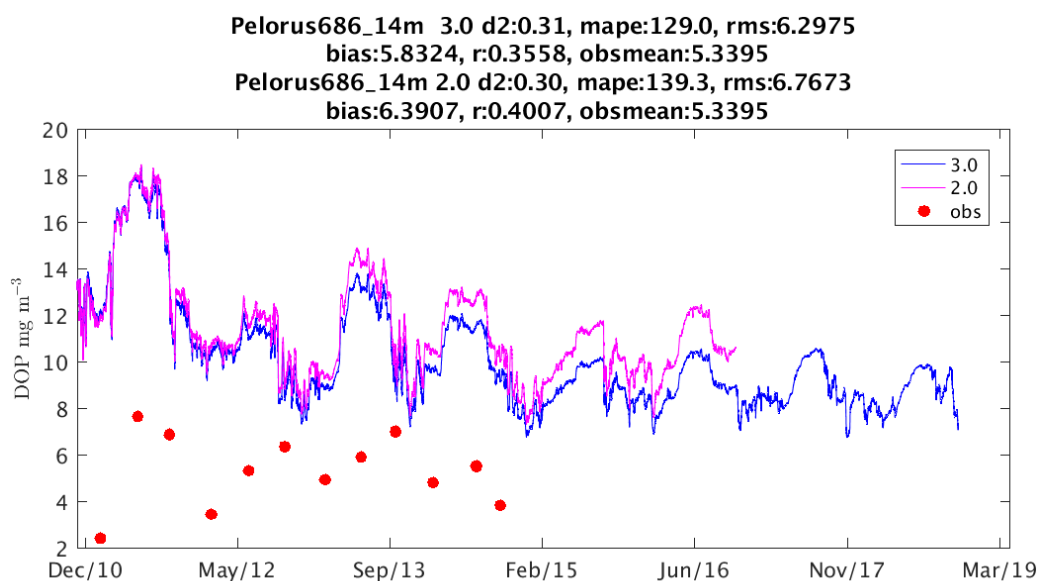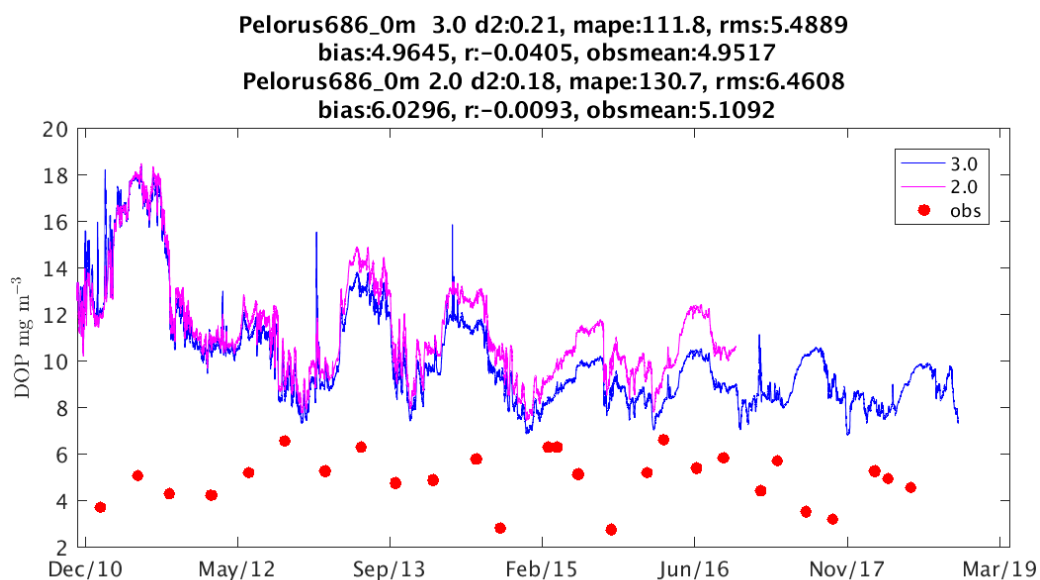

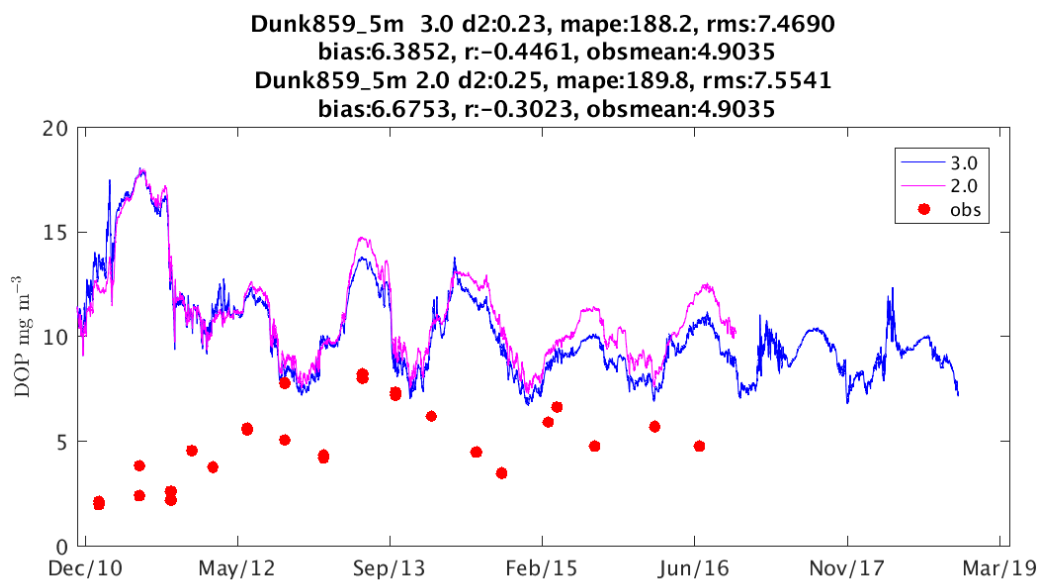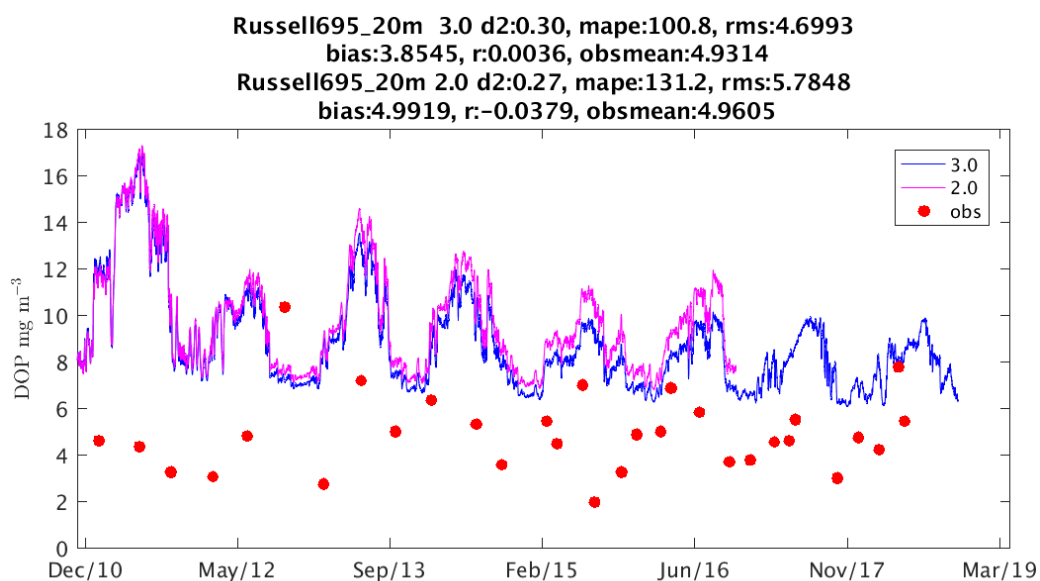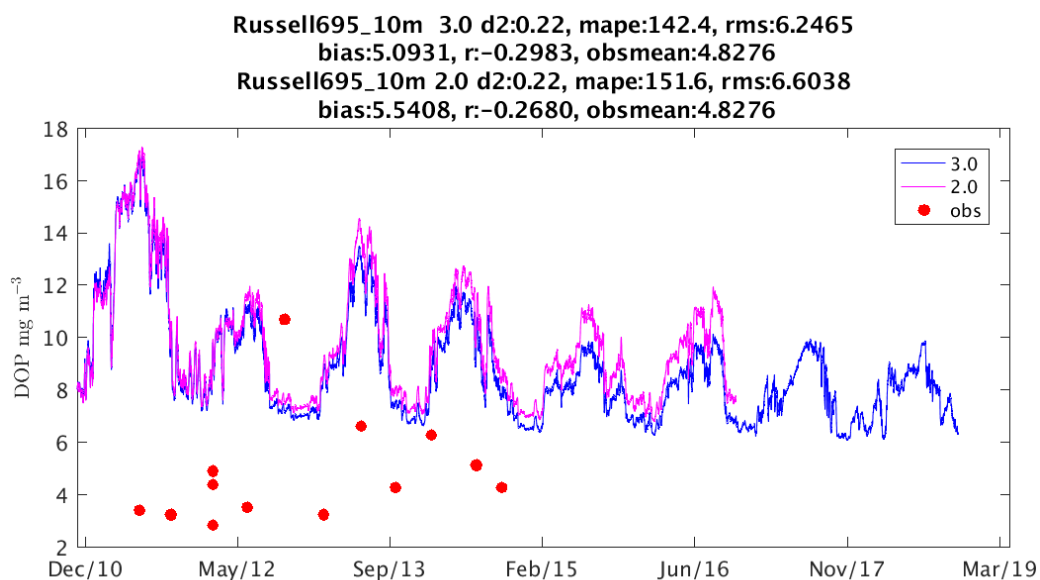

**Russell695\_0m 3.0 d2:0.25, mape:122.1, rms:5.9229**  
 bias:3.1925, r:-0.0679, obsmean:5.5534  
**Russell695\_0m 2.0 d2:0.25, mape:156.3, rms:6.9967**  
 bias:3.7824, r:-0.1263, obsmean:6.0832

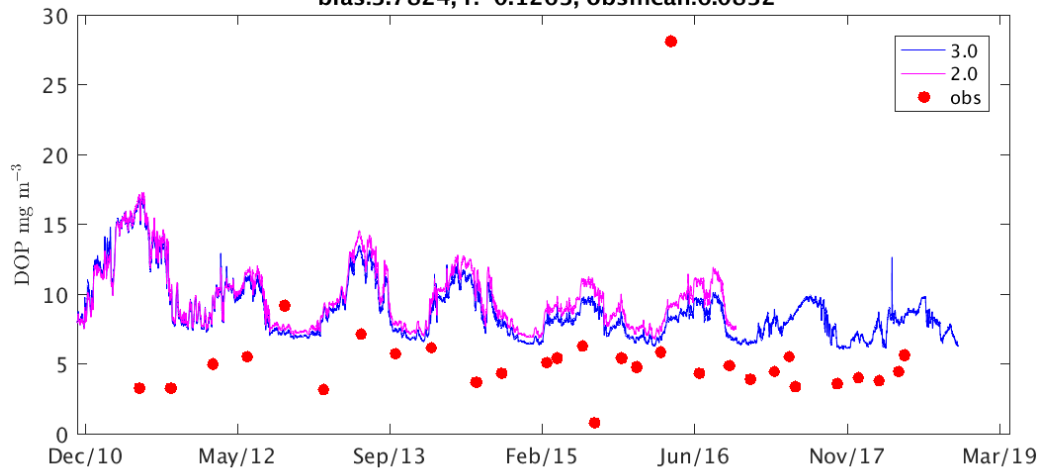

**Highl\_20m 3.0 d2:0.34, mape:850.6, rms:4.9356**  
 bias:4.2532, r:0.1757, obsmean:4.8275  
**Highl\_20m 2.0 d2:0.31, mape:1345.5, rms:5.9000**  
 bias:5.1474, r:0.0835, obsmean:5.0531

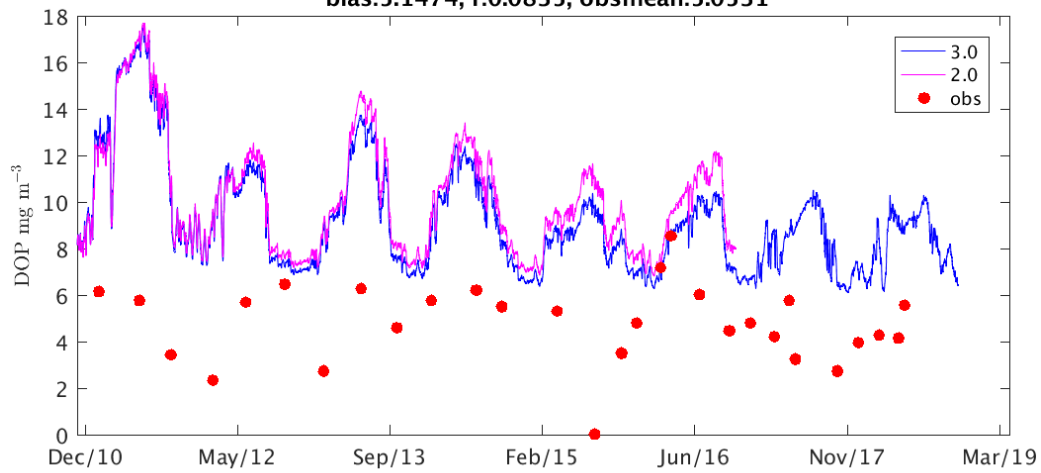

**Highl\_10m 3.0 d2:0.27, mape:208.5, rms:6.4048**  
 bias:5.2198, r:-0.1601, obsmean:5.2384  
**Highl\_10m 2.0 d2:0.27, mape:216.9, rms:6.6958**  
 bias:5.6228, r:-0.1209, obsmean:5.2384

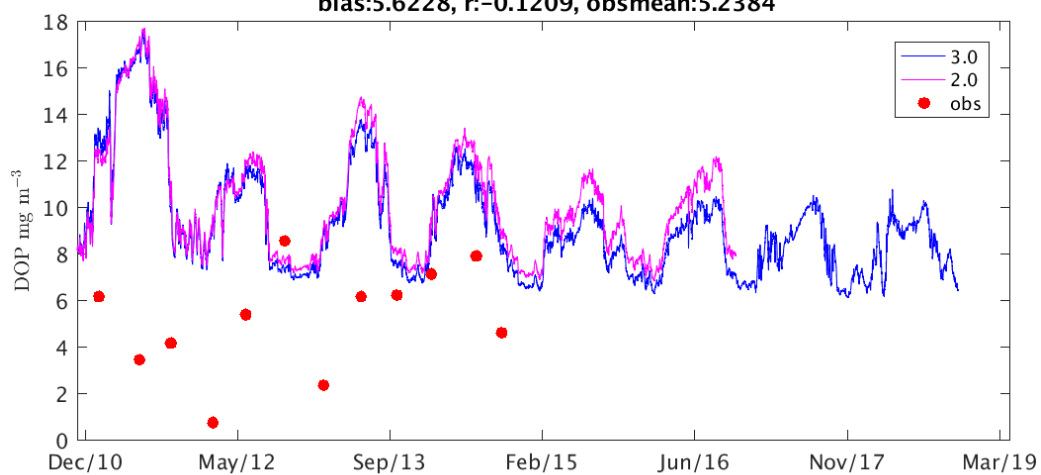

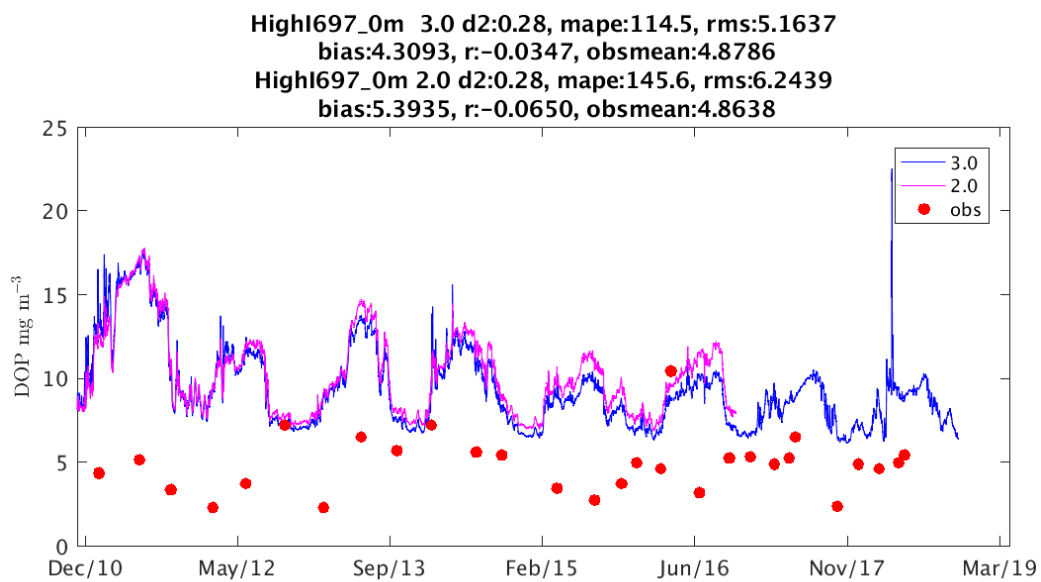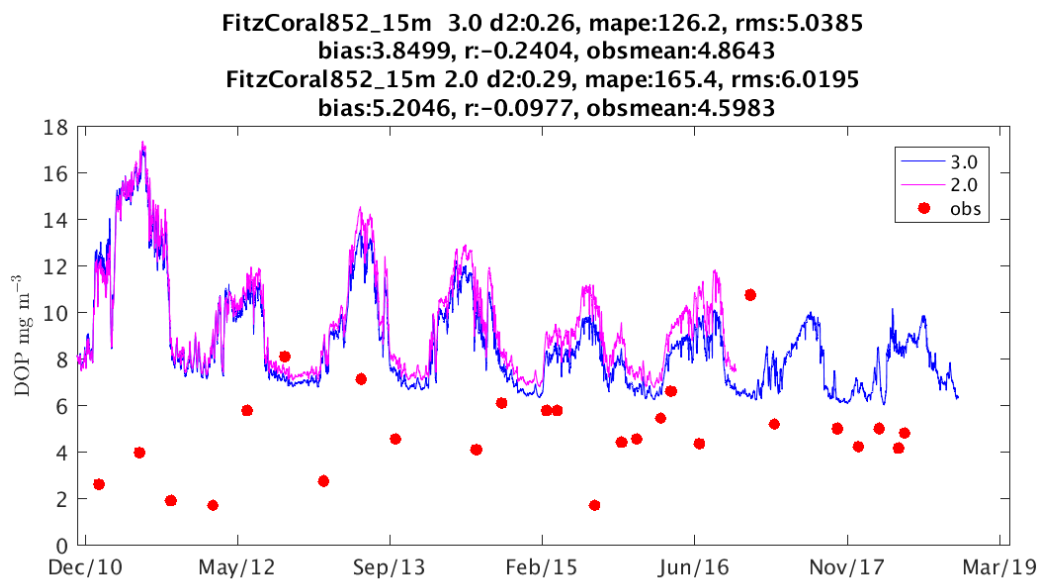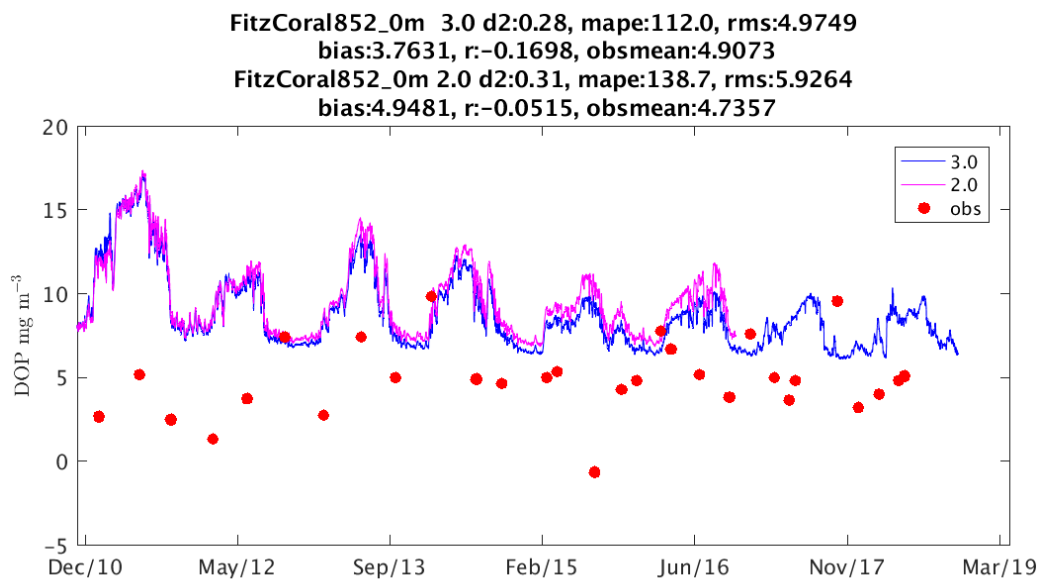

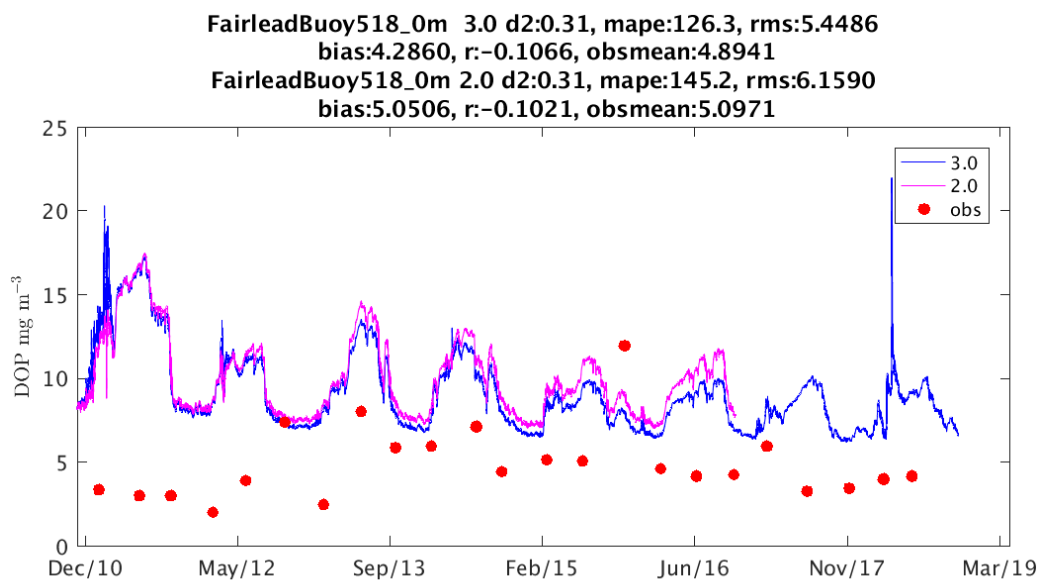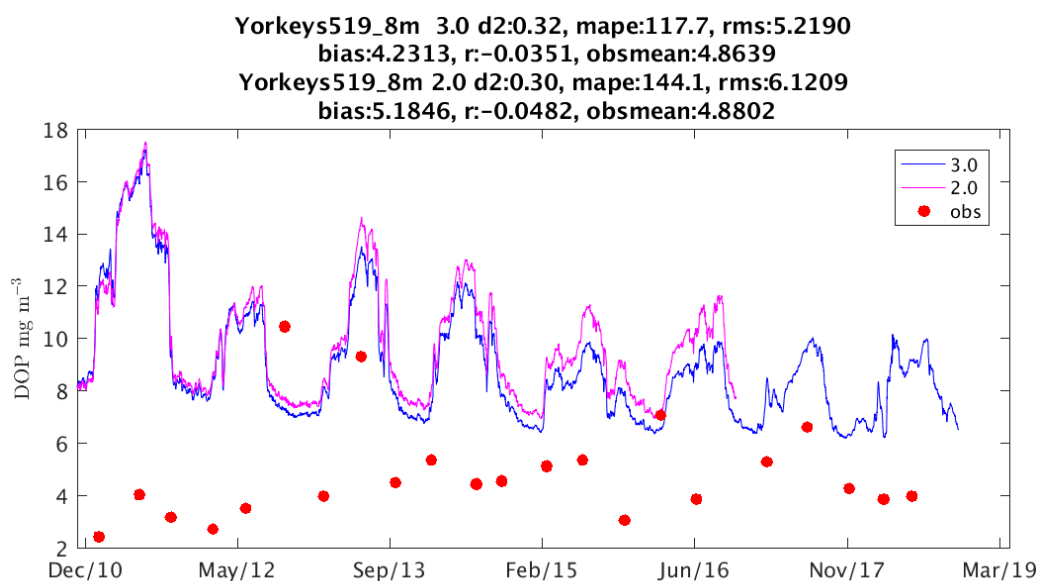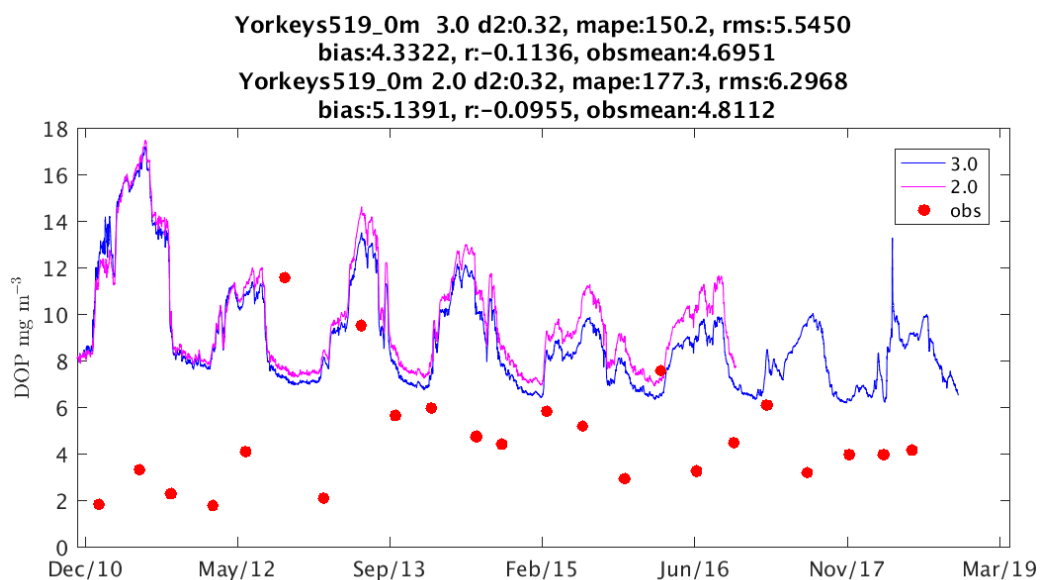

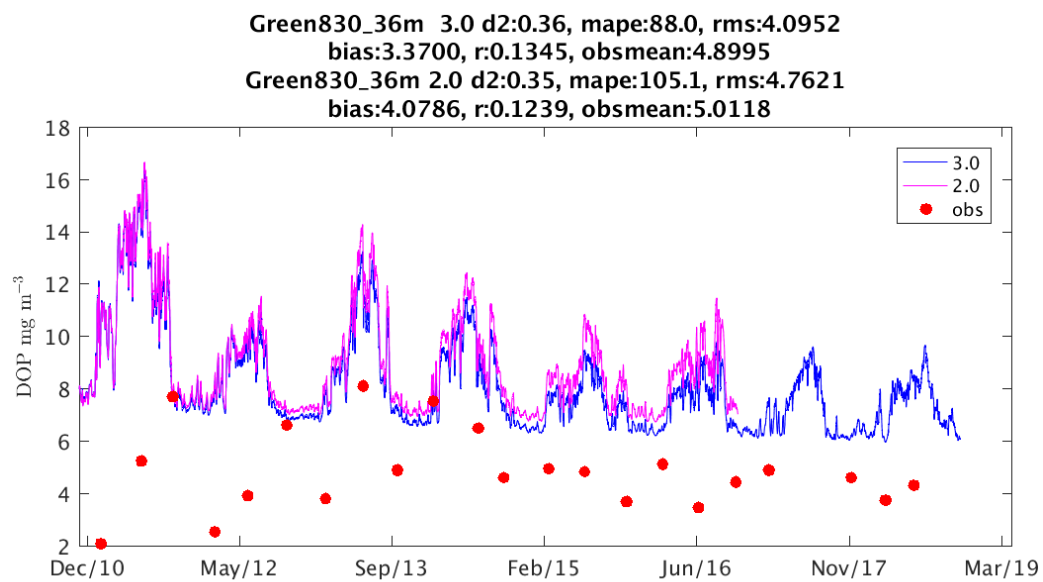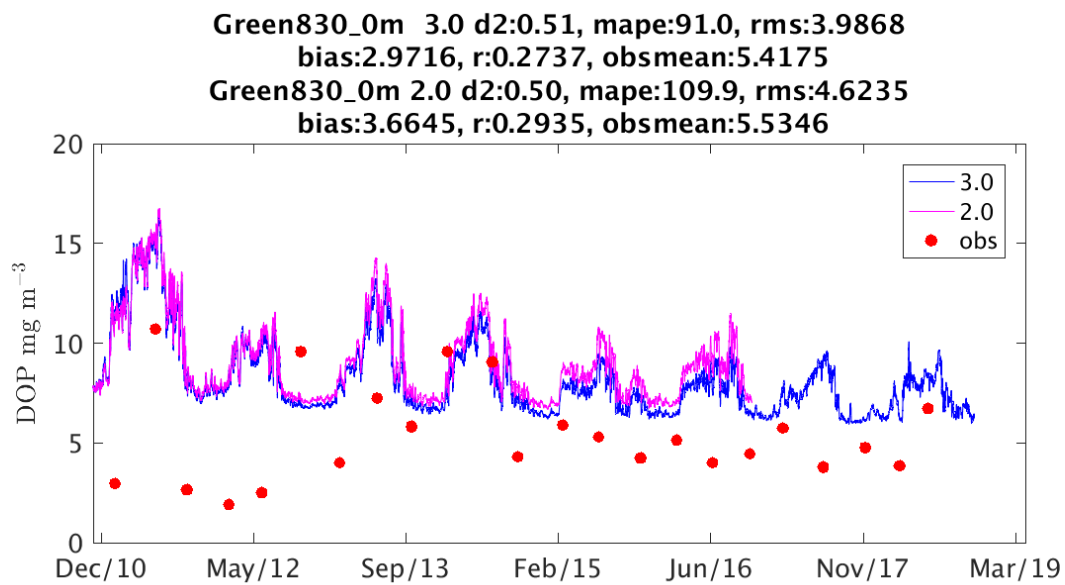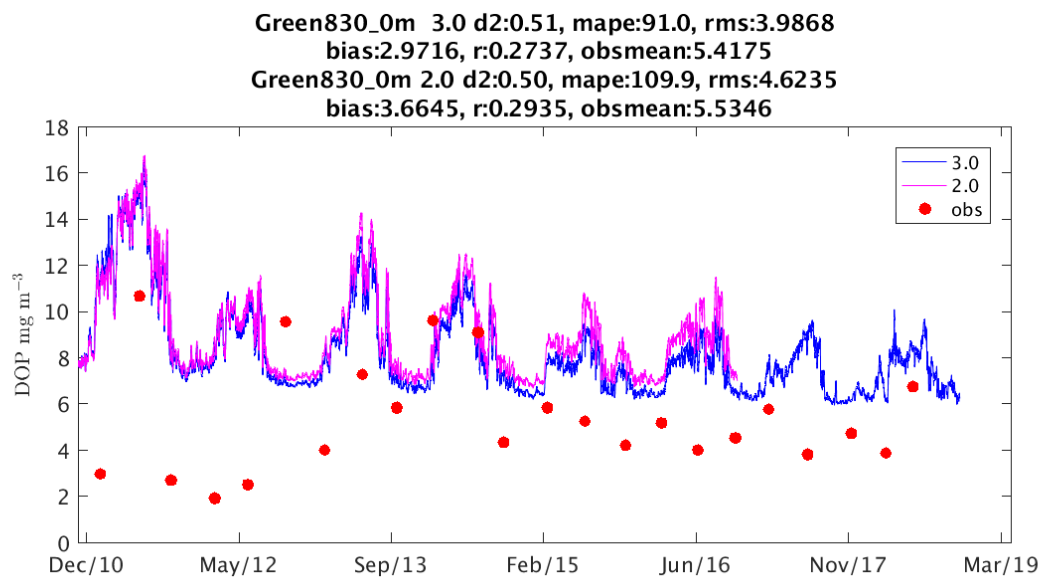

**DoubleI520\_18m 3.0 d2:0.34, mape:106.3, rms:4.7207**  
 bias:3.9513, r:0.1004, obsmean:4.6859  
**DoubleI520\_18m 2.0 d2:0.31, mape:136.4, rms:5.6207**  
 bias:5.0262, r:0.2092, obsmean:4.4513

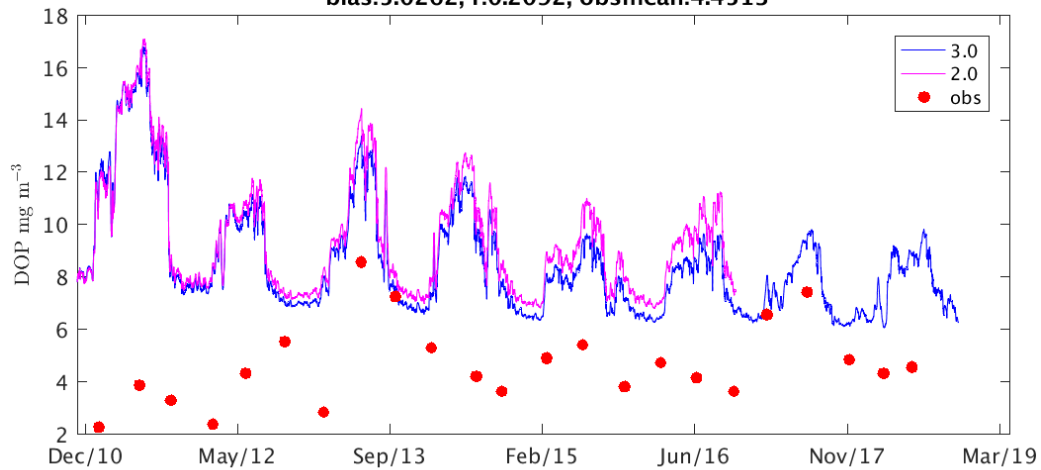

**DoubleI520\_0m 3.0 d2:0.31, mape:147.8, rms:5.2335**  
 bias:4.5274, r:0.0605, obsmean:4.1256  
**DoubleI520\_0m 2.0 d2:0.32, mape:177.5, rms:6.0089**  
 bias:5.3629, r:0.1286, obsmean:4.1254

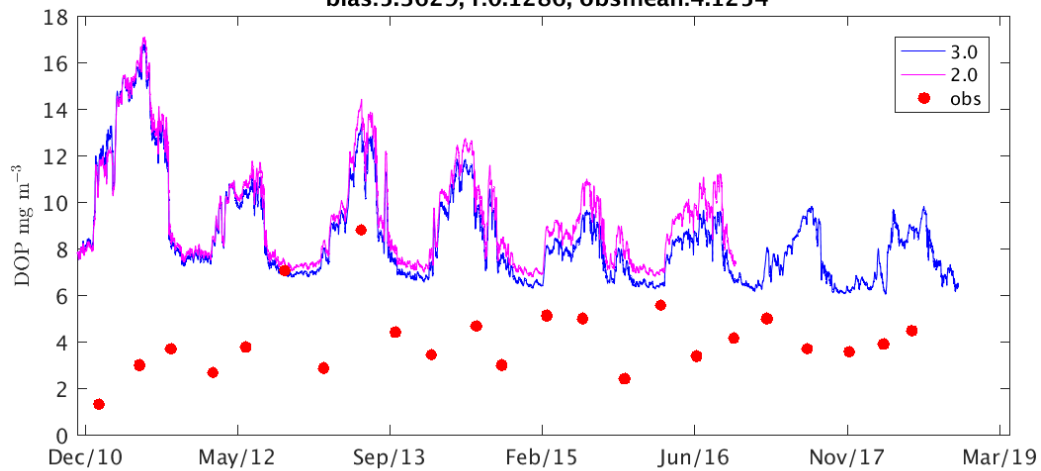

**PortD\_15m 3.0 d2:0.27, mape:151.3, rms:5.4406**  
 bias:4.9602, r:0.2046, obsmean:3.8554  
**PortD\_15m 2.0 d2:0.26, mape:191.2, rms:6.4043**  
 bias:6.0710, r:0.4159, obsmean:3.6449

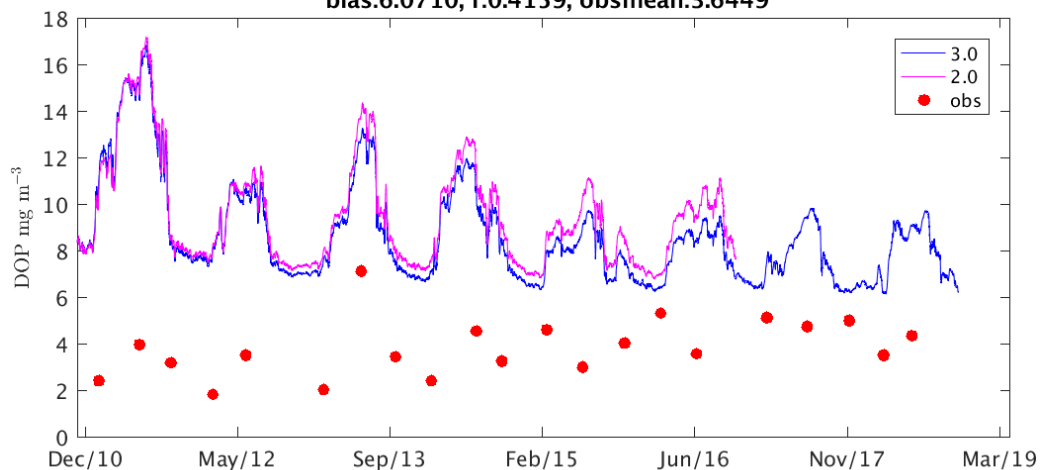

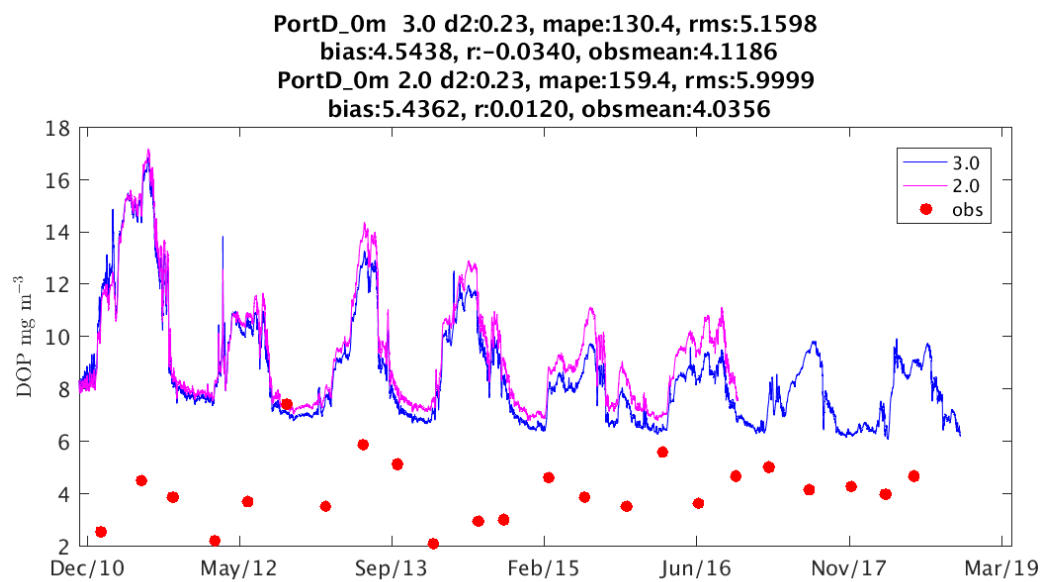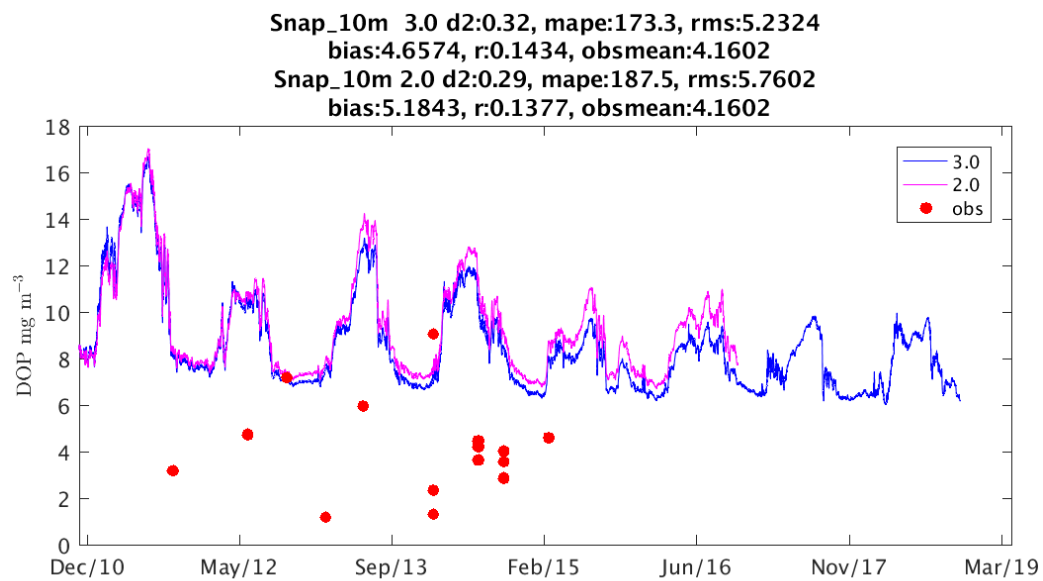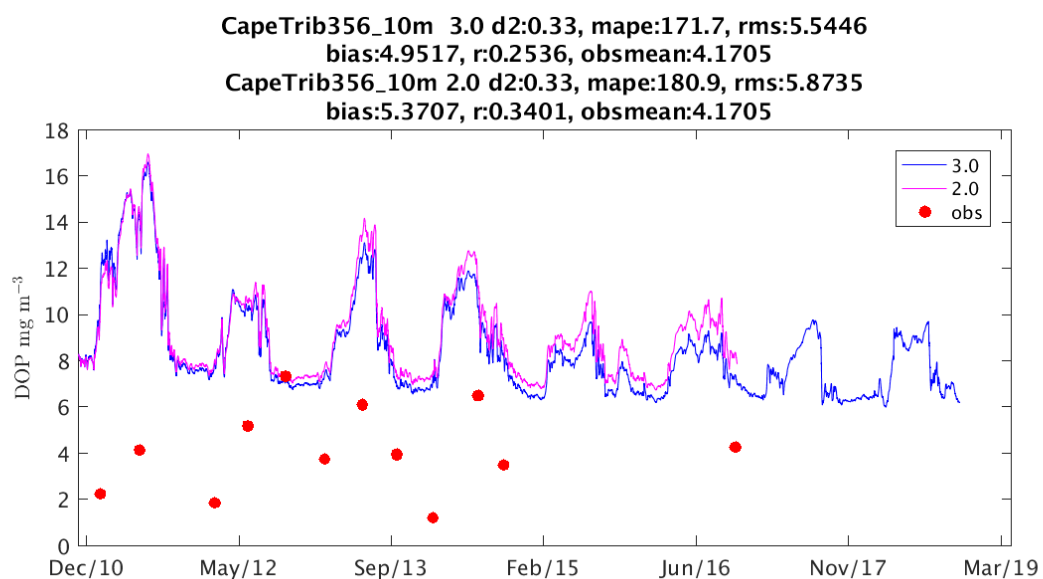



## 17. Simulated EFI assessment against Long Term Monitoring TSS

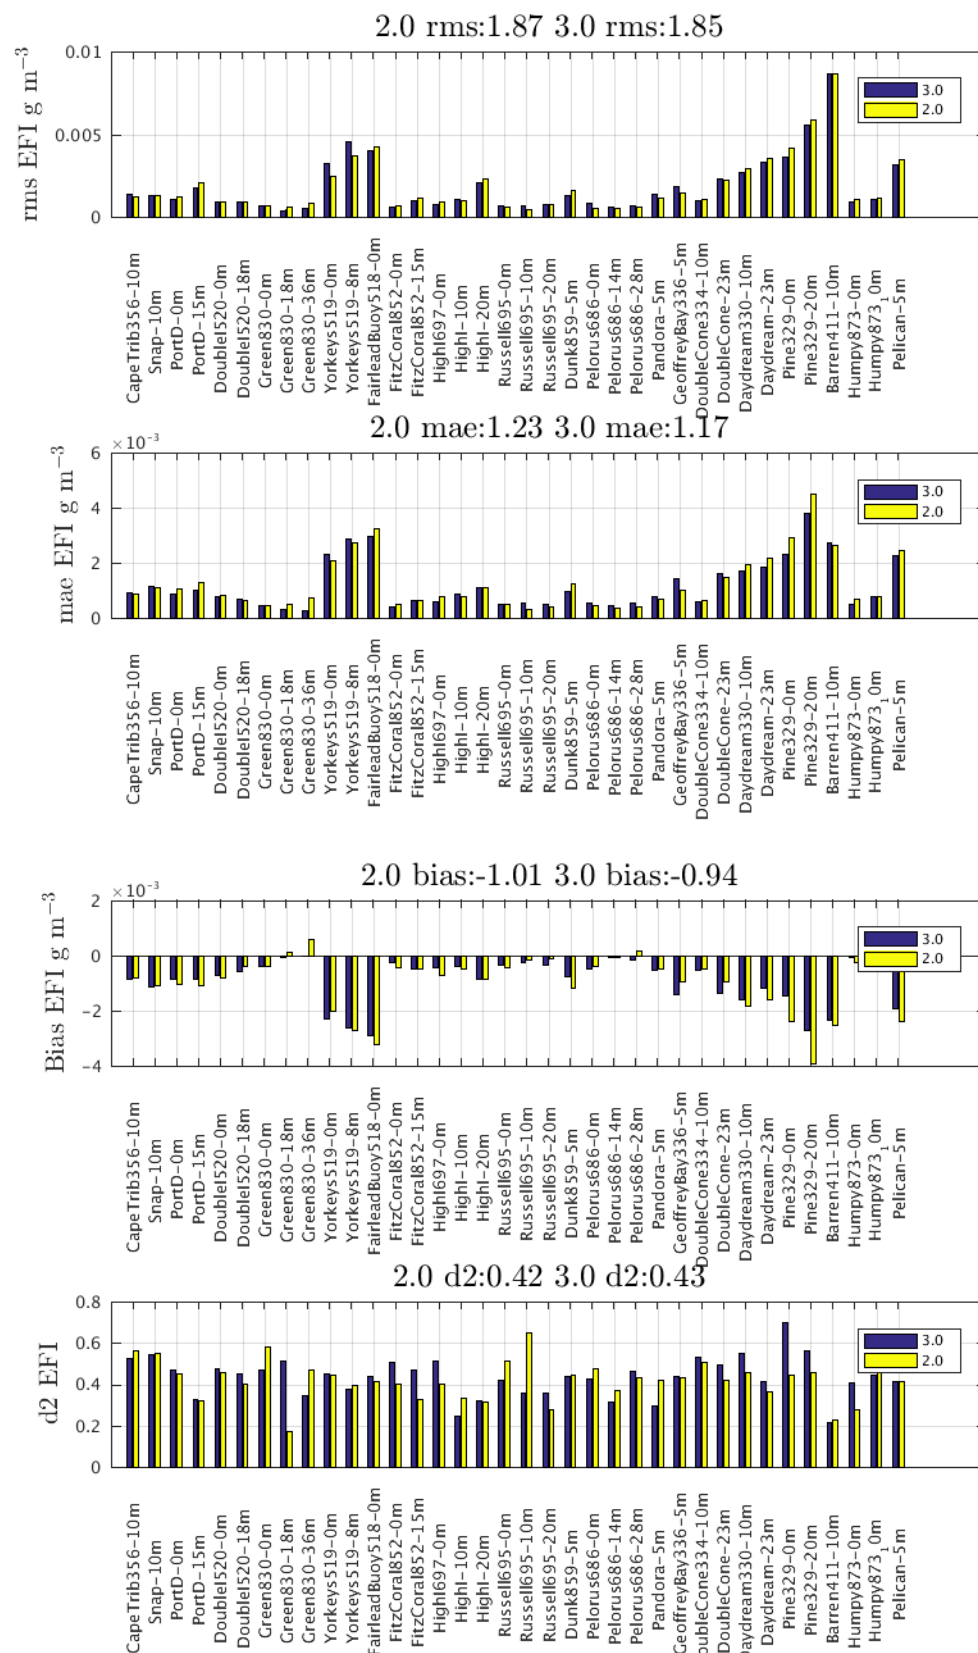

Figure 12 Metrics for Long Term Monitoring sites EFI model assessment against TSS observations for model version 3p0 and 2p0 d2 = Willmott index see Statistical metric page 27.mae:mean absolute error, rms root mean square

Pelican\_5m 3.0 d2:0.41, mape:79.4, rms:0.0032  
 bias:-0.0019, r:0.0770, obsmean:0.0027  
 Pelican\_5m 2.0 d2:0.41, mape:81.4, rms:0.0035  
 bias:-0.0024, r:-0.1694, obsmean:0.0027

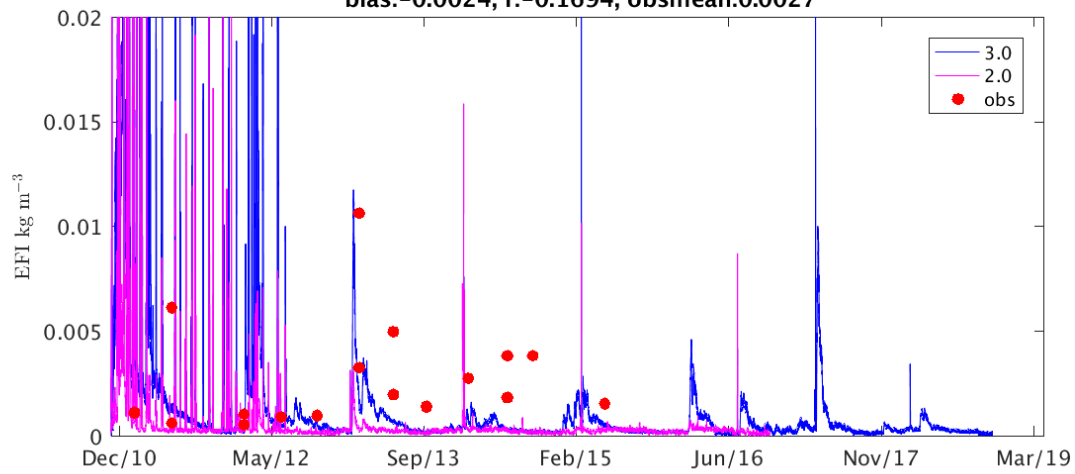

Humpy873\_10m 3.0 d2:0.44, mape:85.4, rms:0.0011  
 bias:-0.0002, r:0.1055, obsmean:0.0009  
 Humpy873\_10m 2.0 d2:0.50, mape:72.5, rms:0.0011  
 bias:-0.0005, r:0.1395, obsmean:0.0009

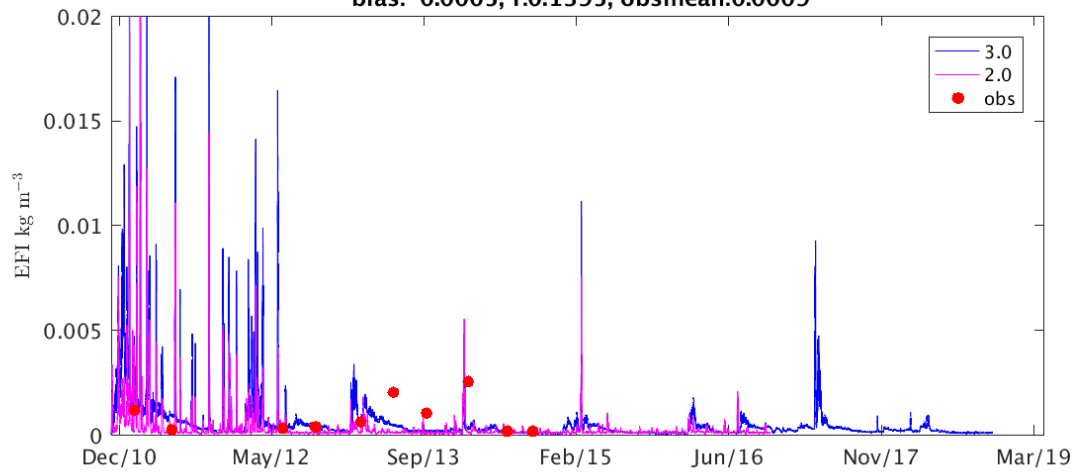

Humpy873\_0m 3.0 d2:0.41, mape:91.6, rms:0.0009  
 bias:-0.0001, r:0.1776, obsmean:0.0006  
 Humpy873\_0m 2.0 d2:0.28, mape:112.5, rms:0.0010  
 bias:-0.0003, r:-0.0965, obsmean:0.0006

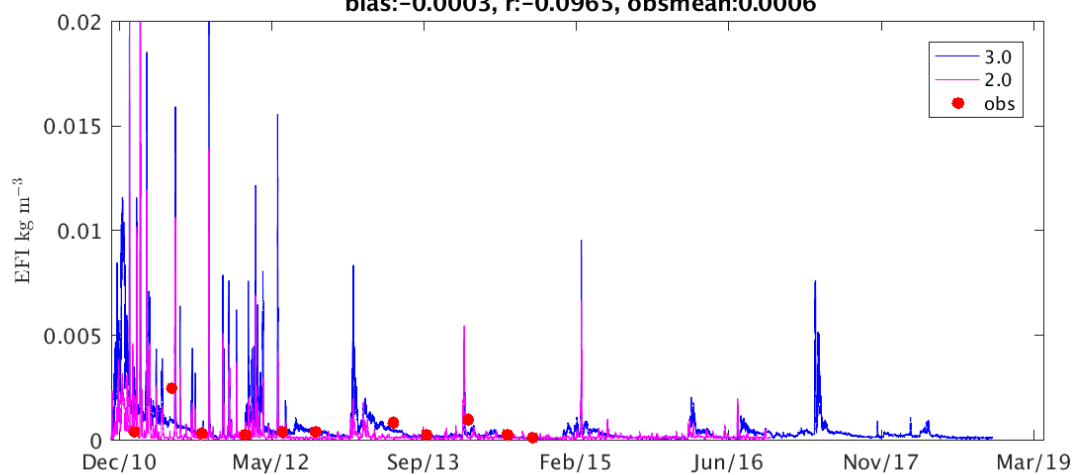

Barren411\_10m 3.0 d2:0.22, mape:165.1, rms:0.0086  
 bias:-0.0023, r:-0.1095, obsmean:0.0027  
 Barren411\_10m 2.0 d2:0.23, mape:75.0, rms:0.0087  
 bias:-0.0025, r:-0.1031, obsmean:0.0027

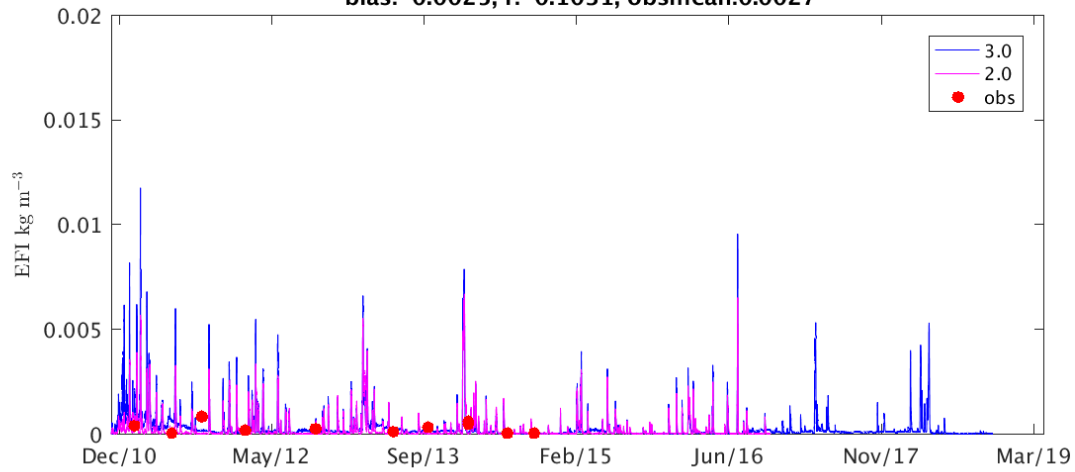

Pine329\_20m 3.0 d2:0.56, mape:87.1, rms:0.0055  
 bias:-0.0027, r:0.2878, obsmean:0.0049  
 Pine329\_20m 2.0 d2:0.46, mape:92.4, rms:0.0059  
 bias:-0.0039, r:0.0328, obsmean:0.0050

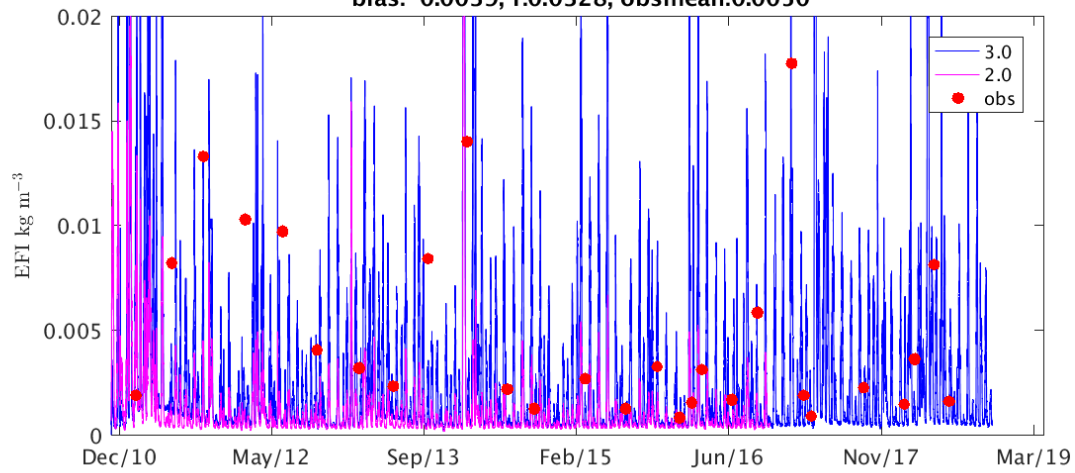

Pine329\_0m 3.0 d2:0.70, mape:70.2, rms:0.0036  
 bias:-0.0015, r:0.5206, obsmean:0.0036  
 Pine329\_0m 2.0 d2:0.44, mape:81.8, rms:0.0041  
 bias:-0.0024, r:0.1325, obsmean:0.0034

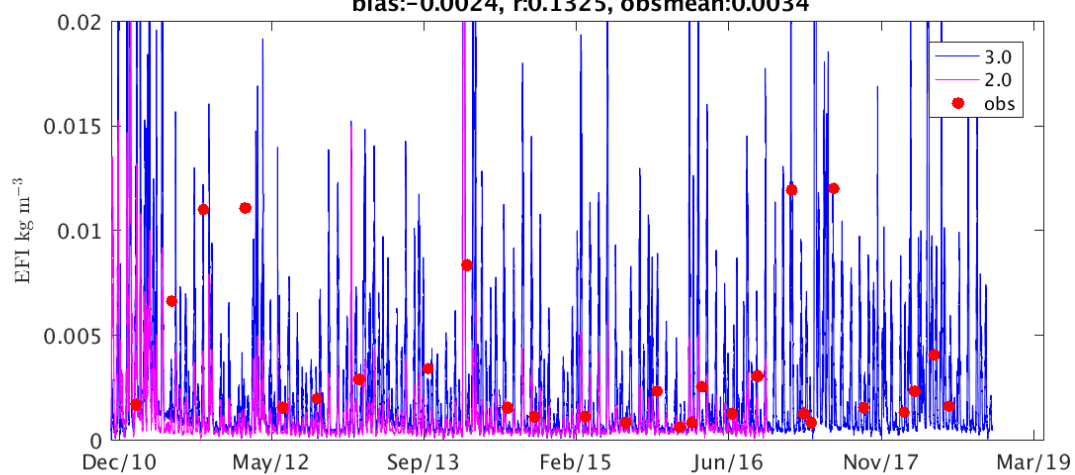

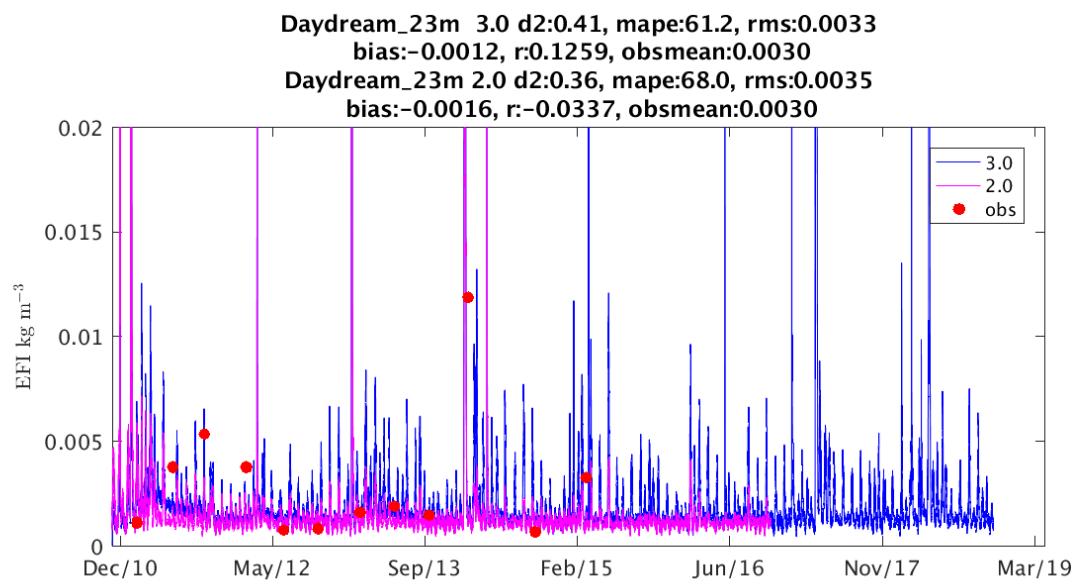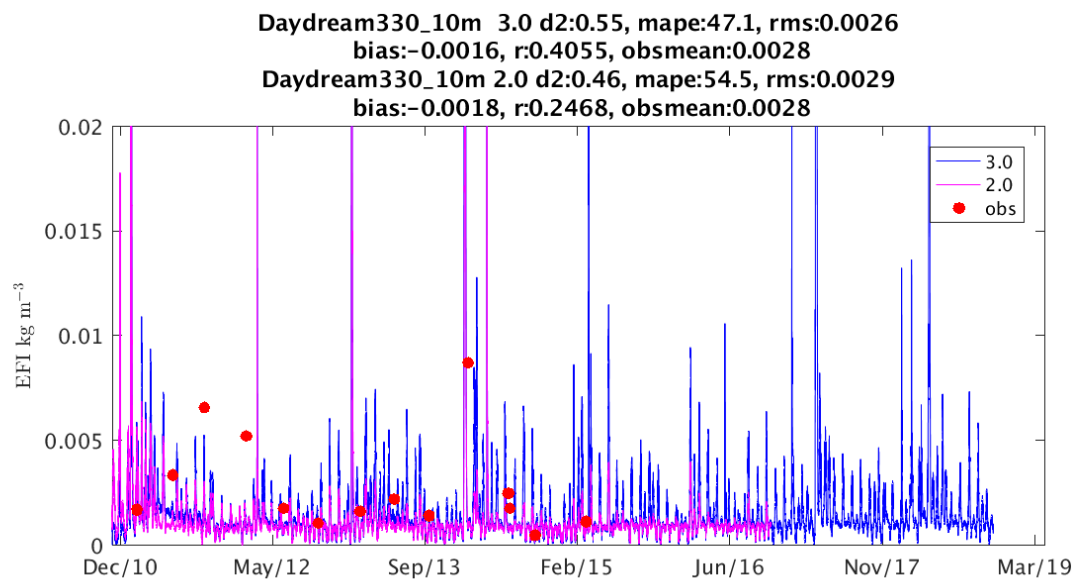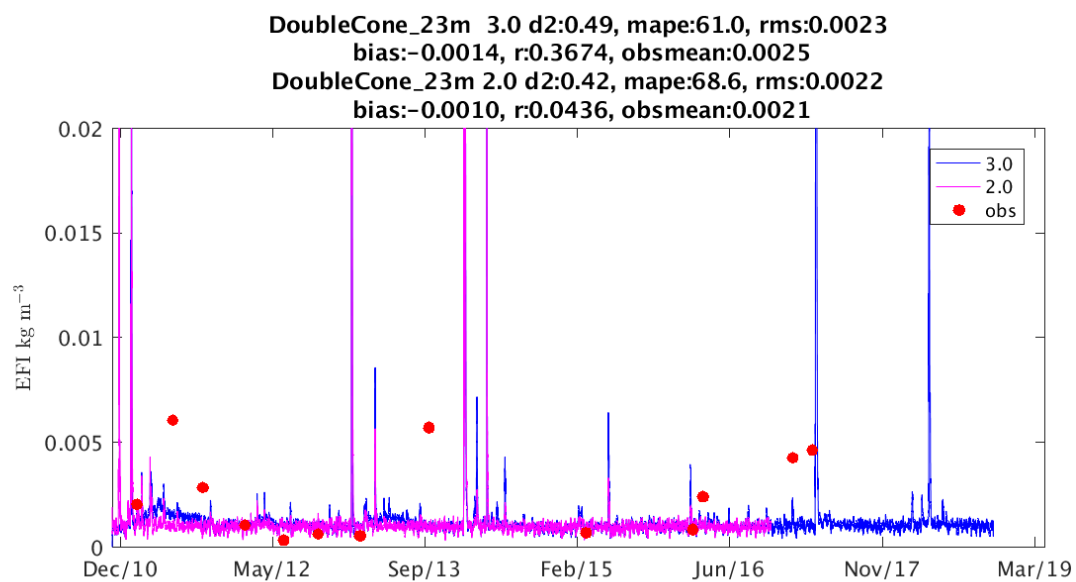

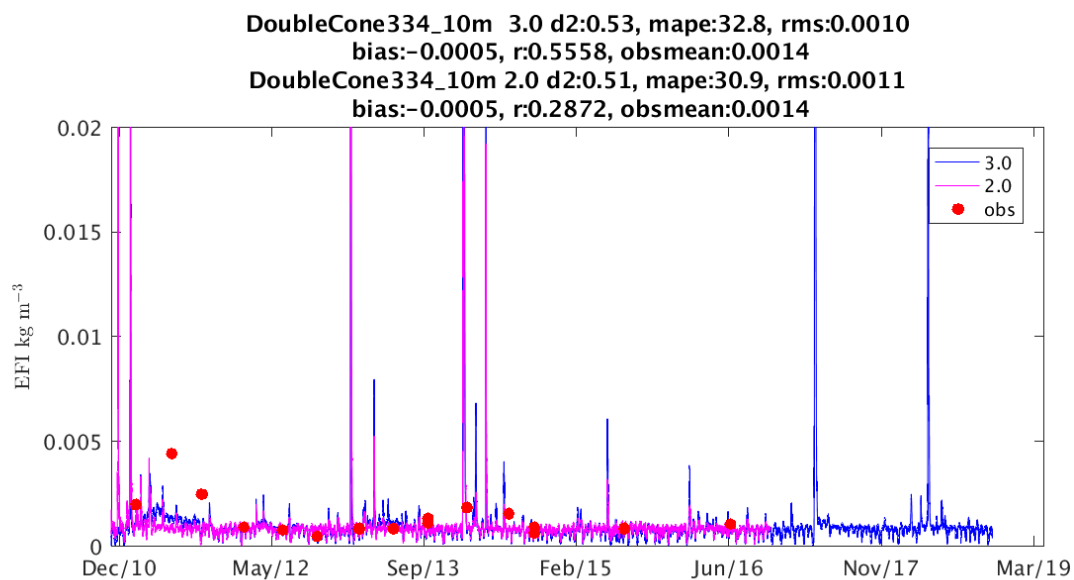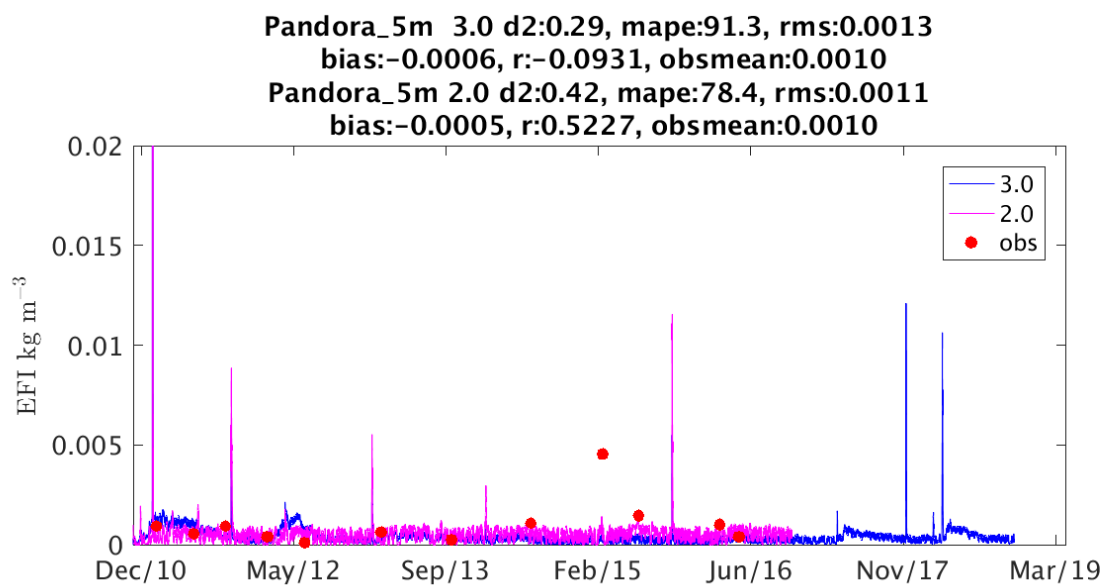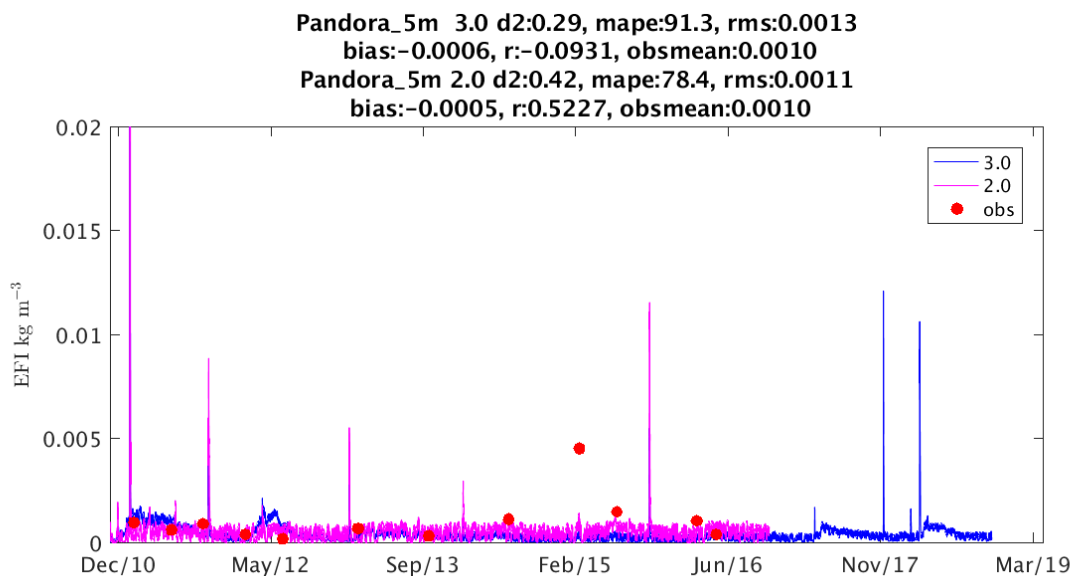

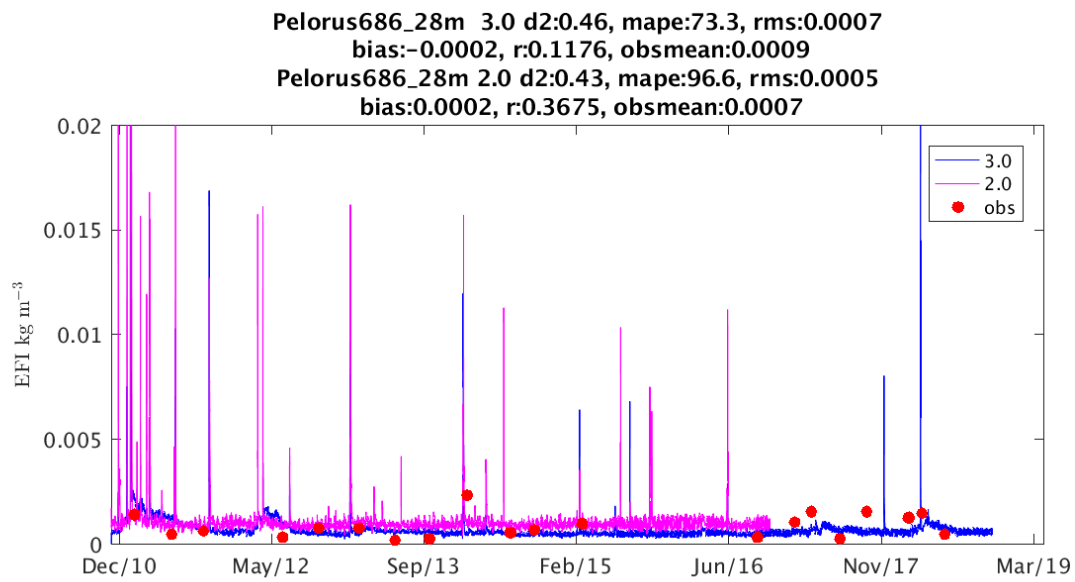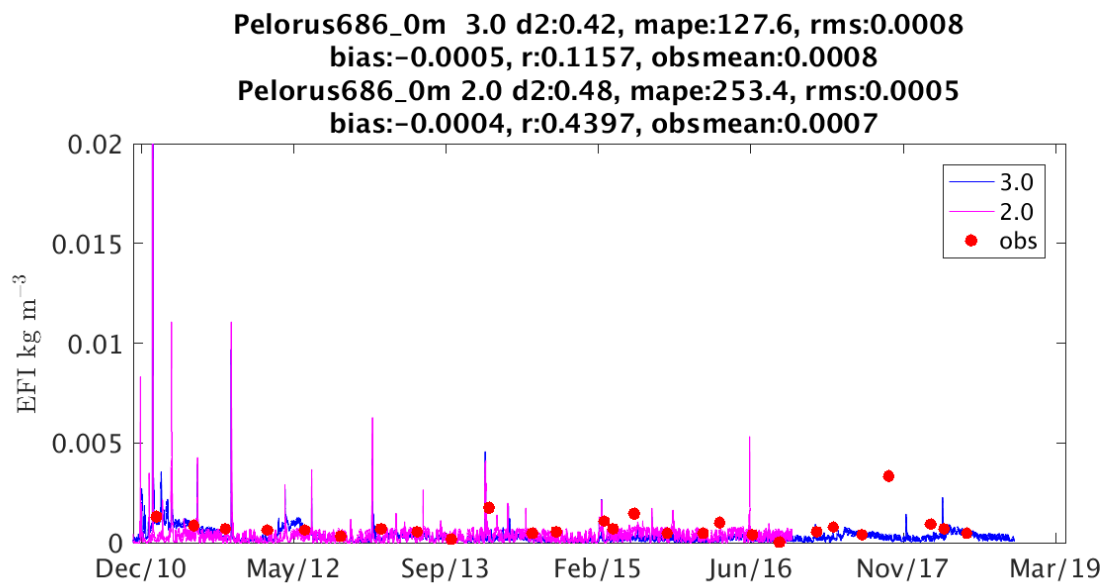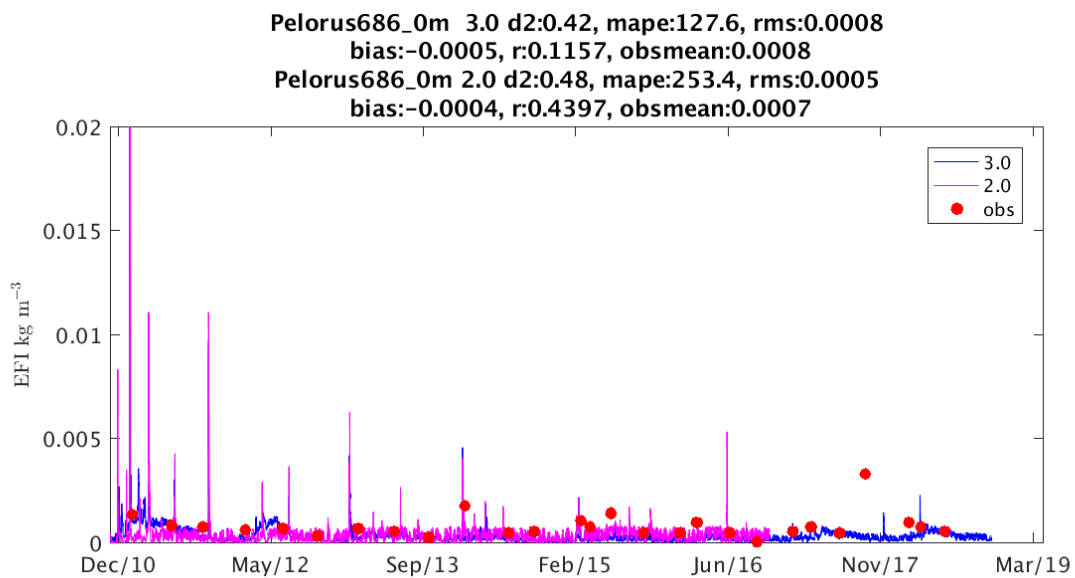

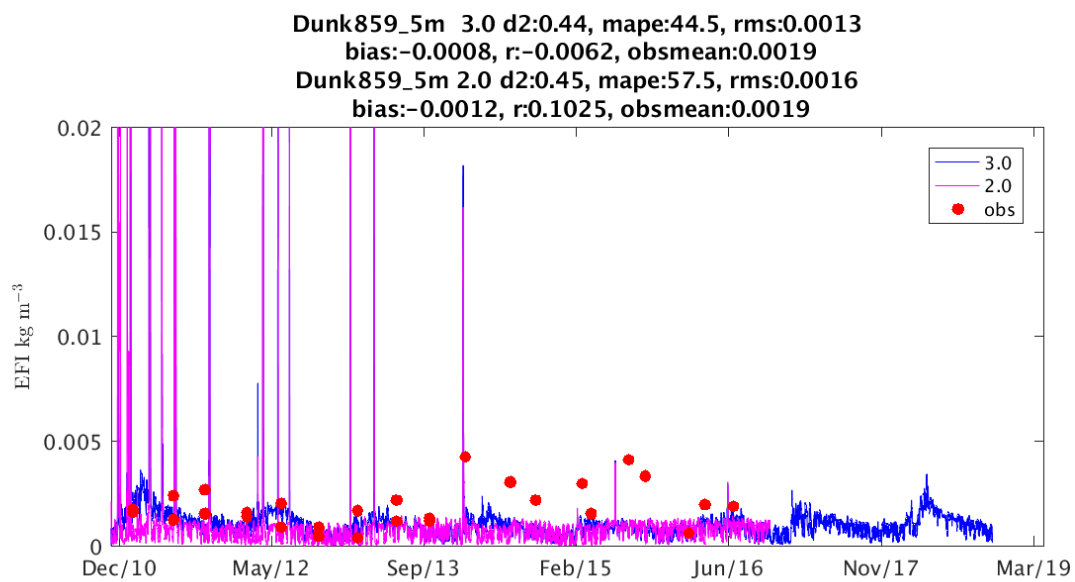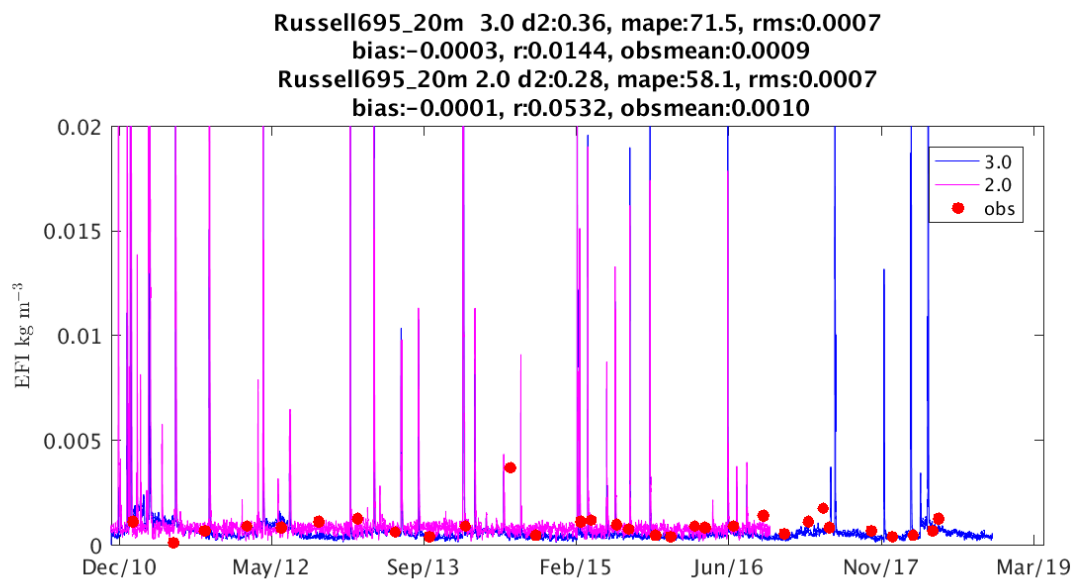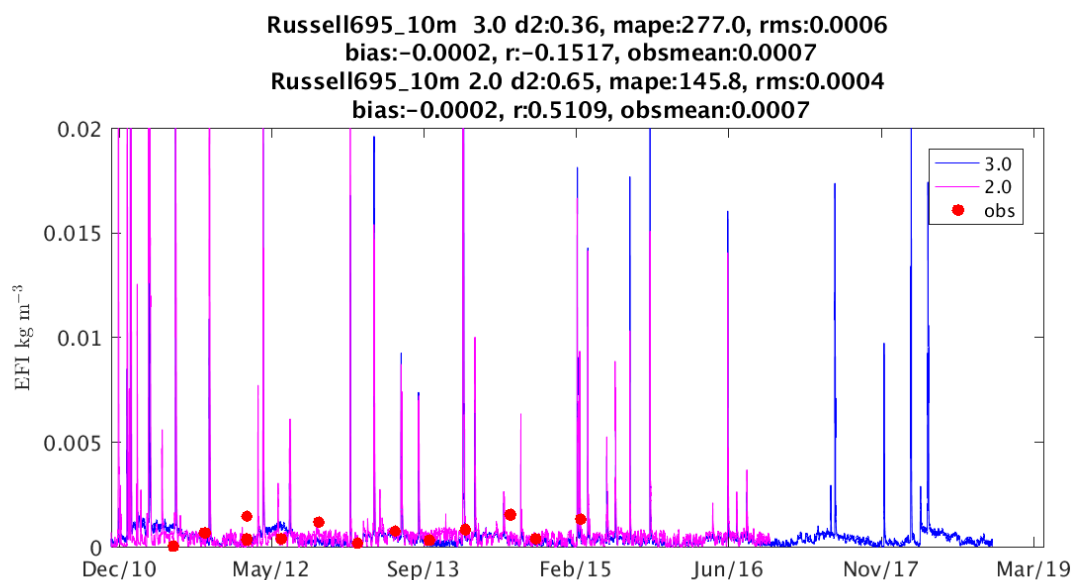

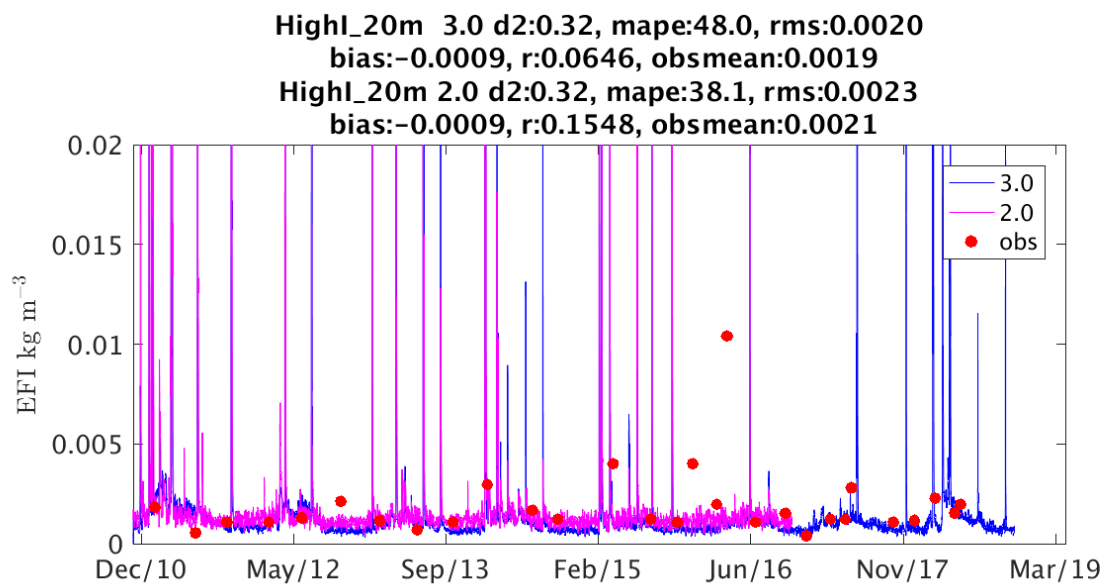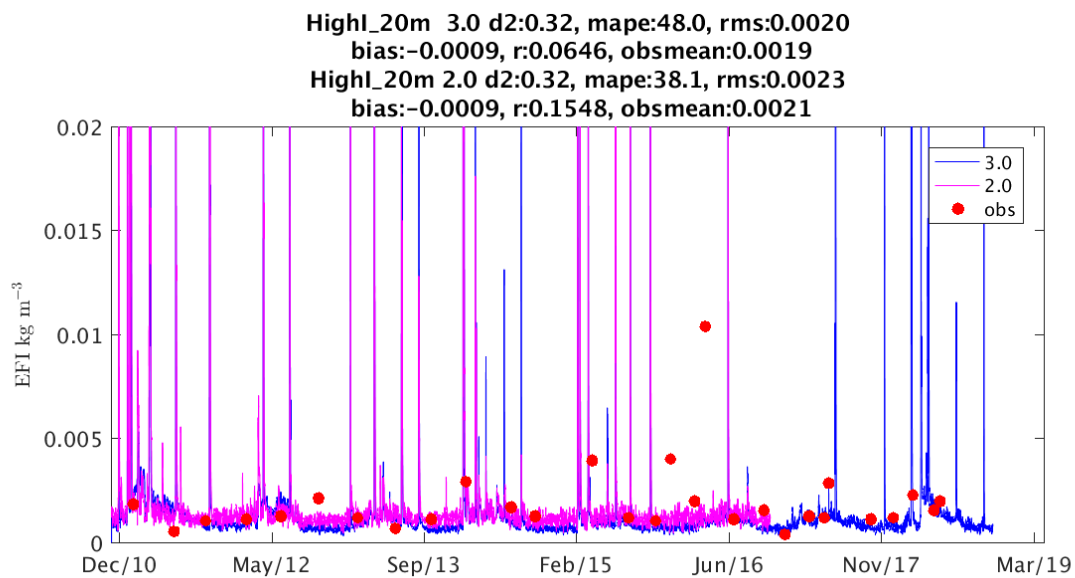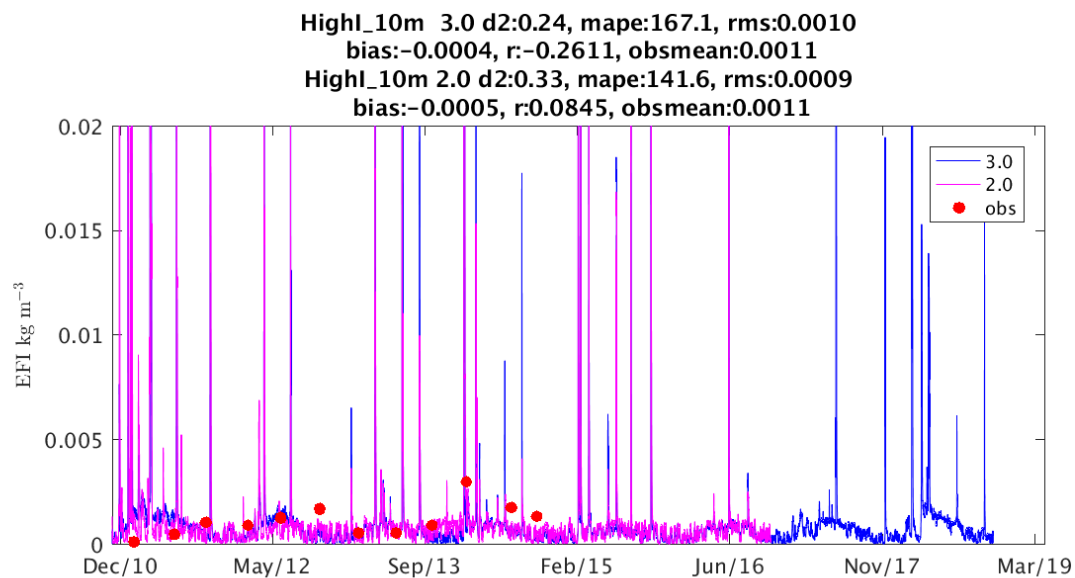



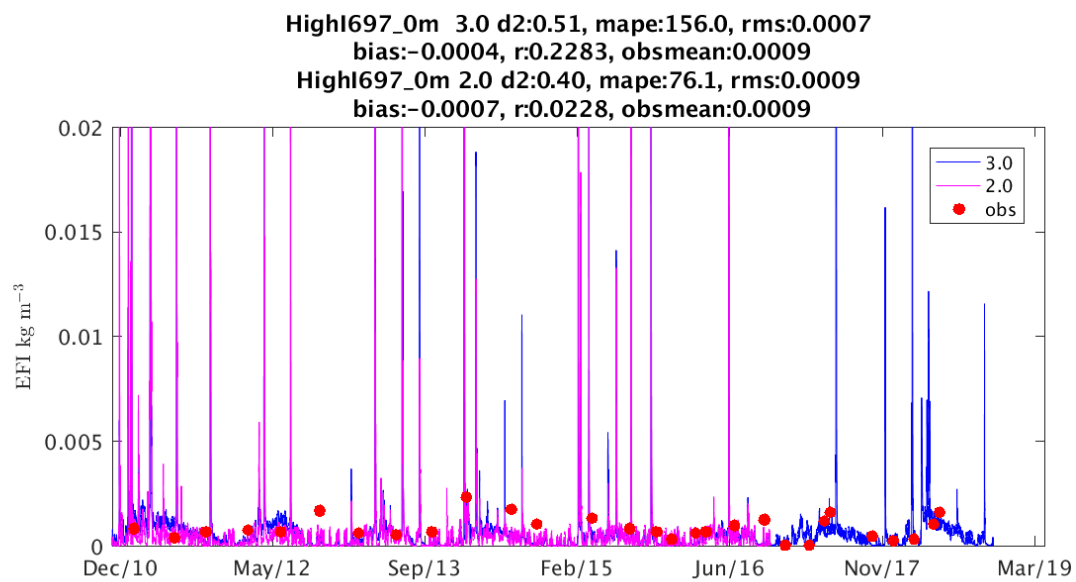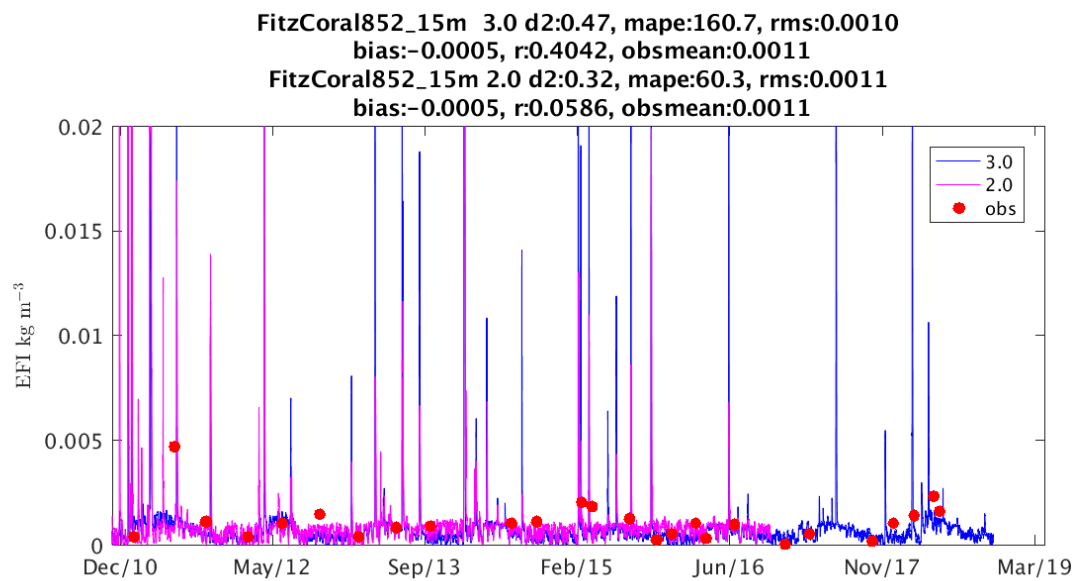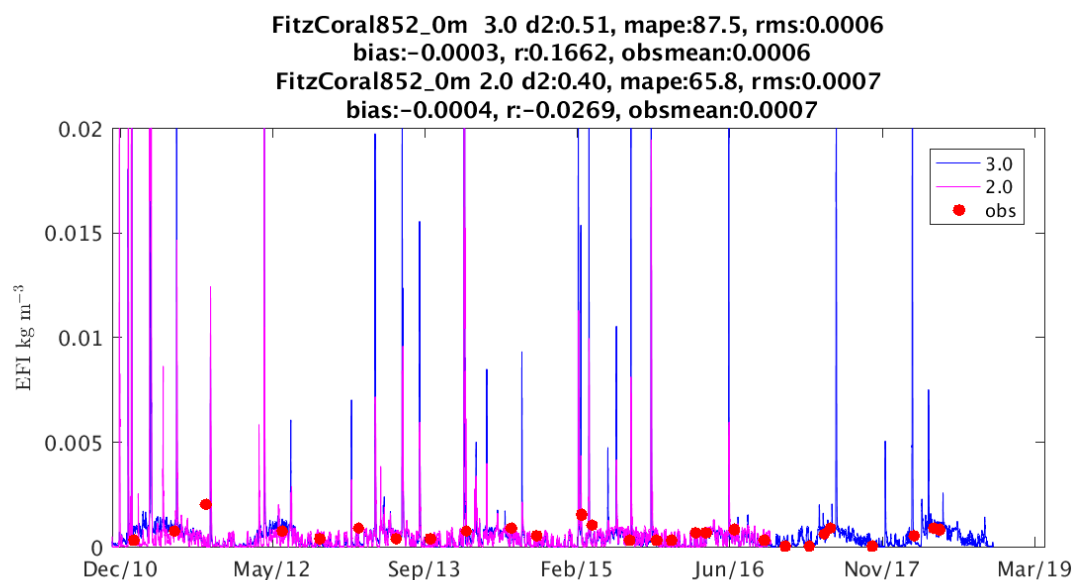

Yorkeys519\_8m 3.0 d2:0.38, mape:55.0, rms:0.0045  
 bias:-0.0026, r:-0.1355, obsmean:0.0043  
 Yorkeys519\_8m 2.0 d2:0.40, mape:68.8, rms:0.0037  
 bias:-0.0027, r:0.3853, obsmean:0.0035

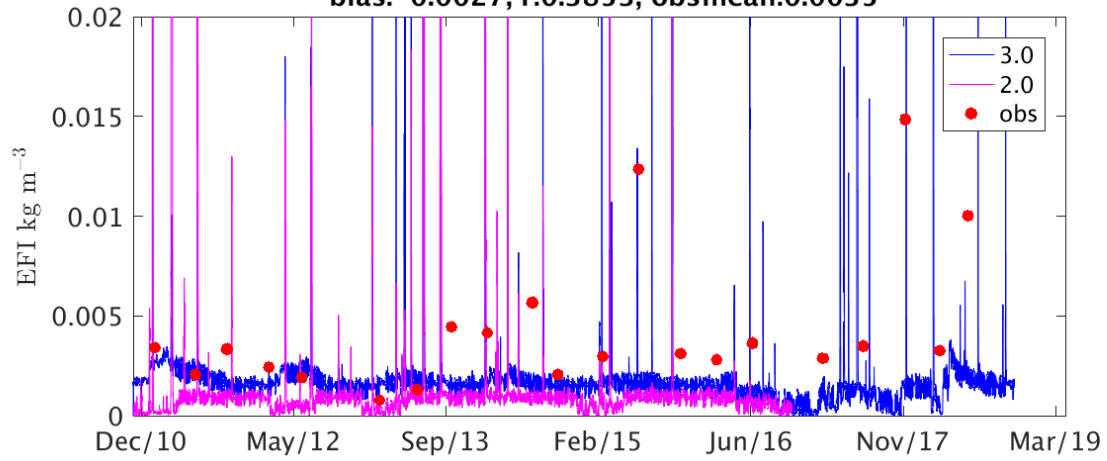

Yorkeys519\_8m 3.0 d2:0.38, mape:55.0, rms:0.0045  
 bias:-0.0026, r:-0.1355, obsmean:0.0043  
 Yorkeys519\_8m 2.0 d2:0.40, mape:68.8, rms:0.0037  
 bias:-0.0027, r:0.3853, obsmean:0.0035

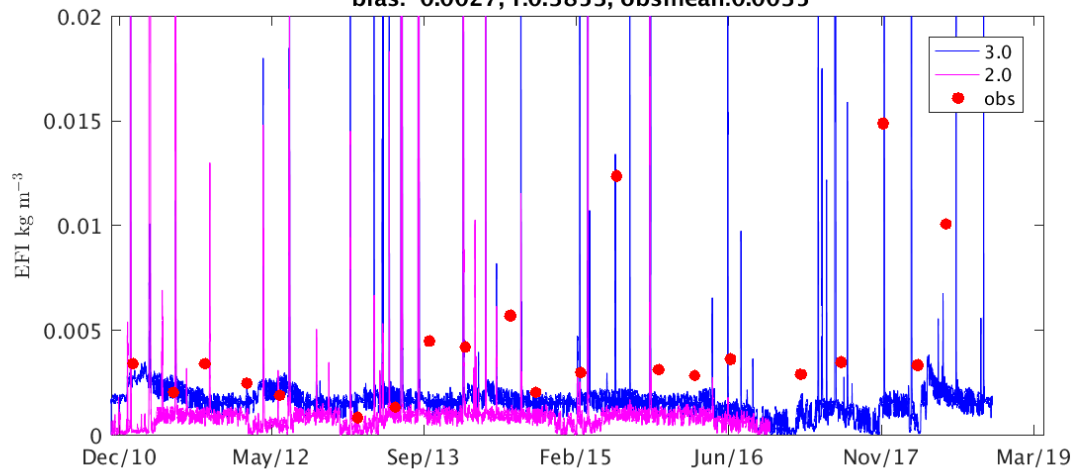

Yorkeys519\_0m 3.0 d2:0.45, mape:70.4, rms:0.0032  
 bias:-0.0023, r:0.3135, obsmean:0.0029  
 Yorkeys519\_0m 2.0 d2:0.44, mape:83.9, rms:0.0025  
 bias:-0.0020, r:0.4884, obsmean:0.0023

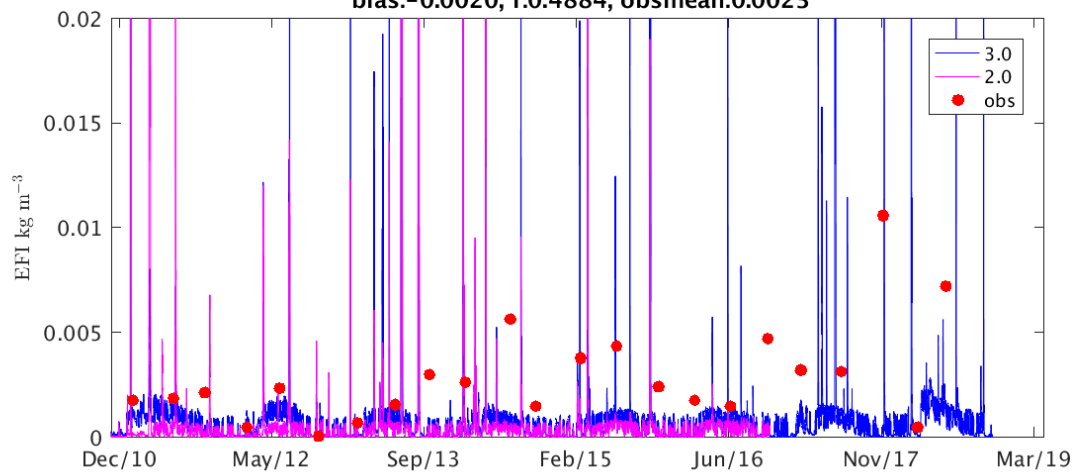

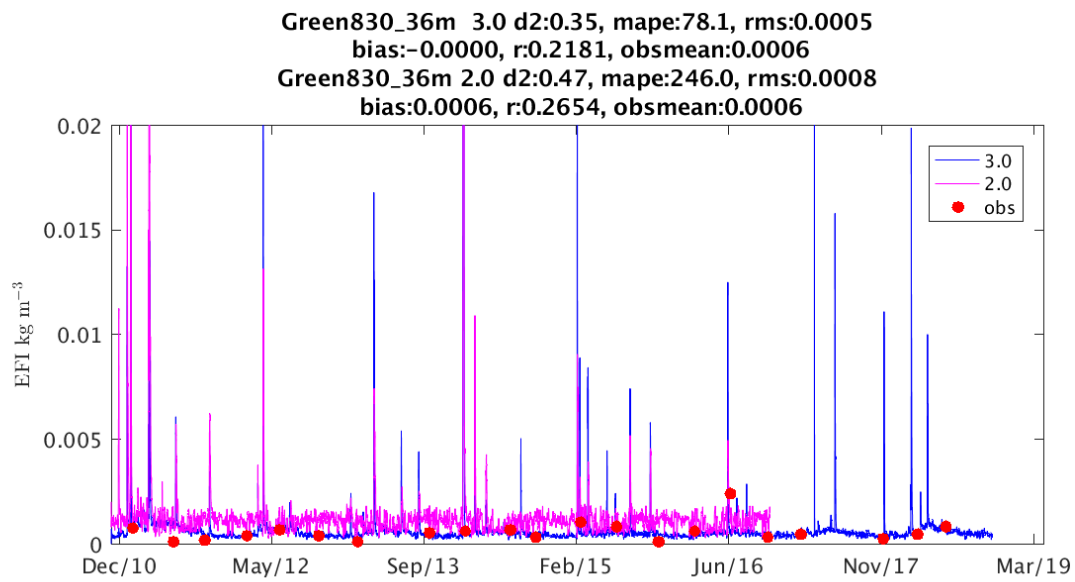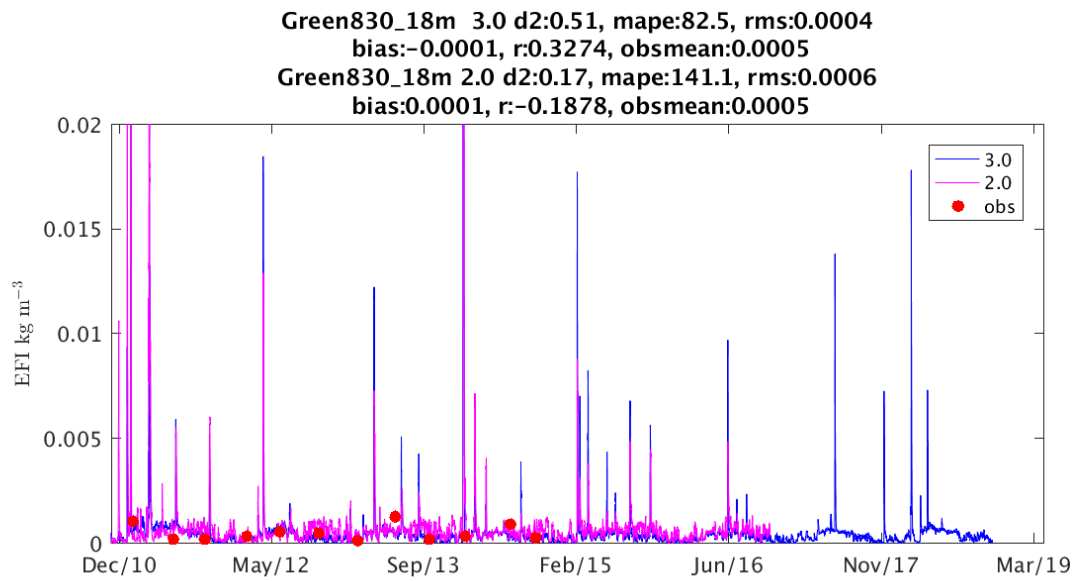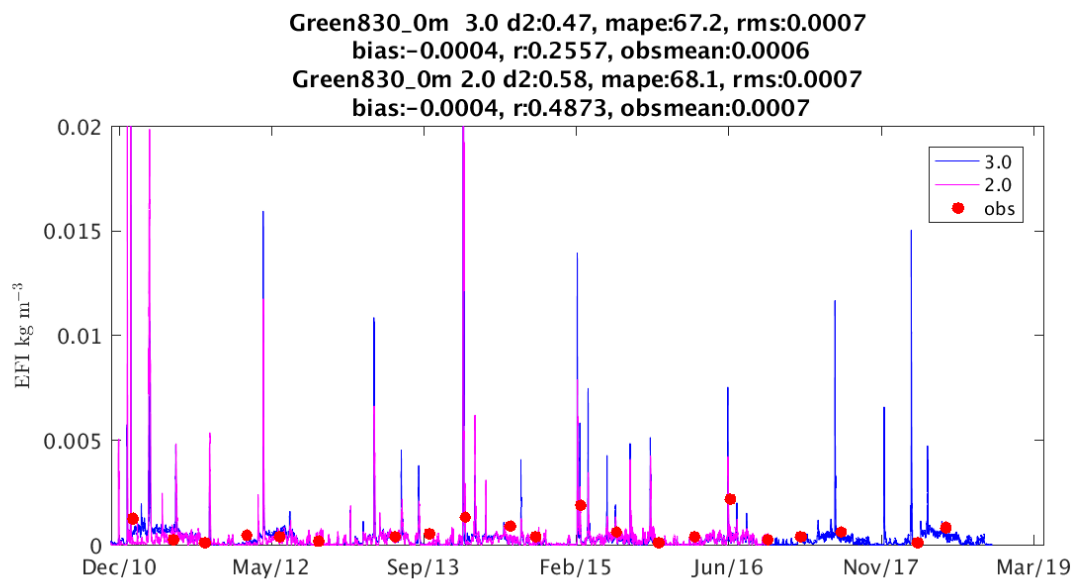

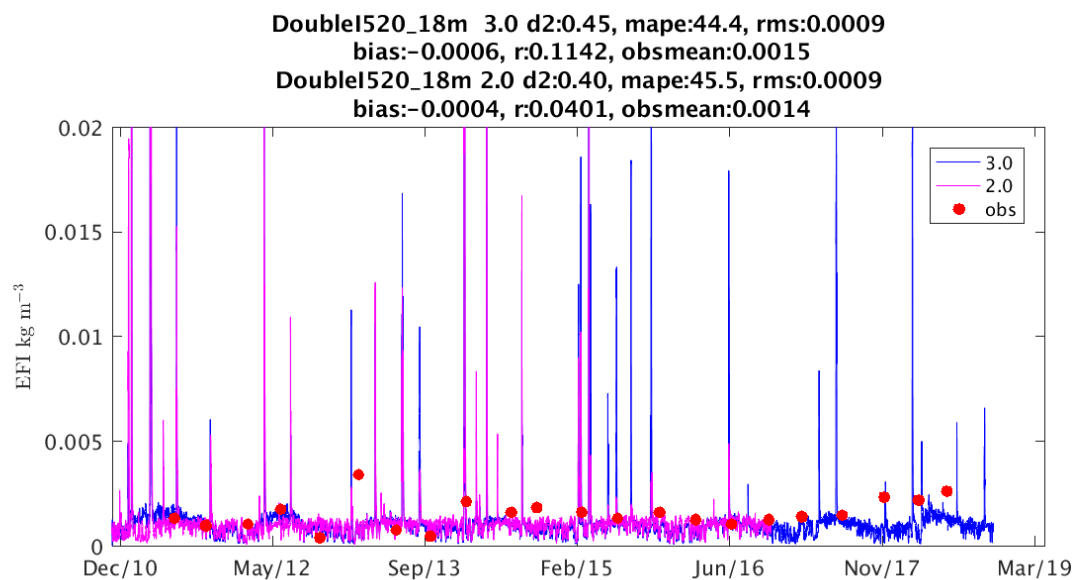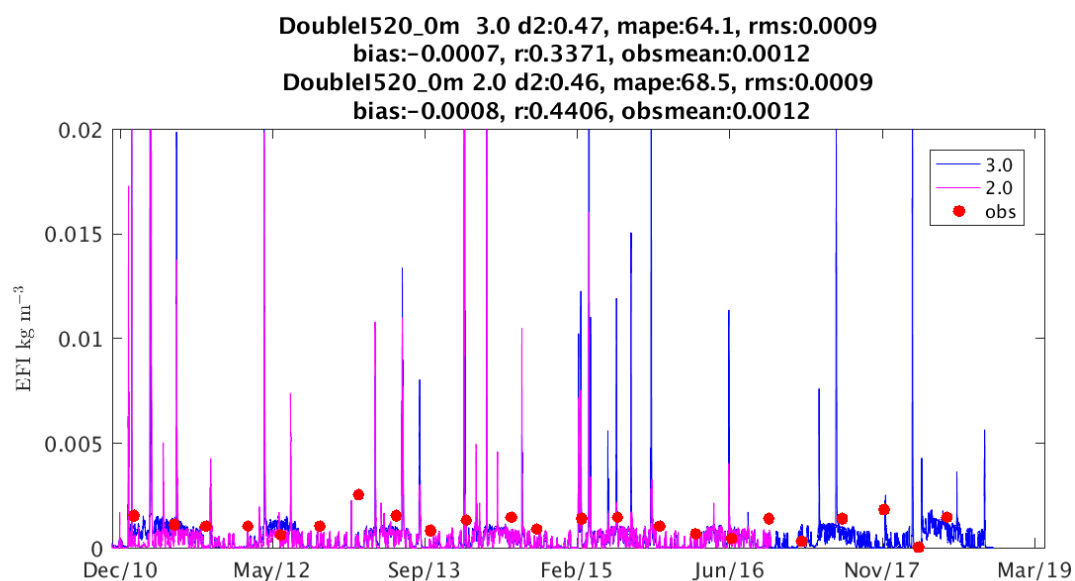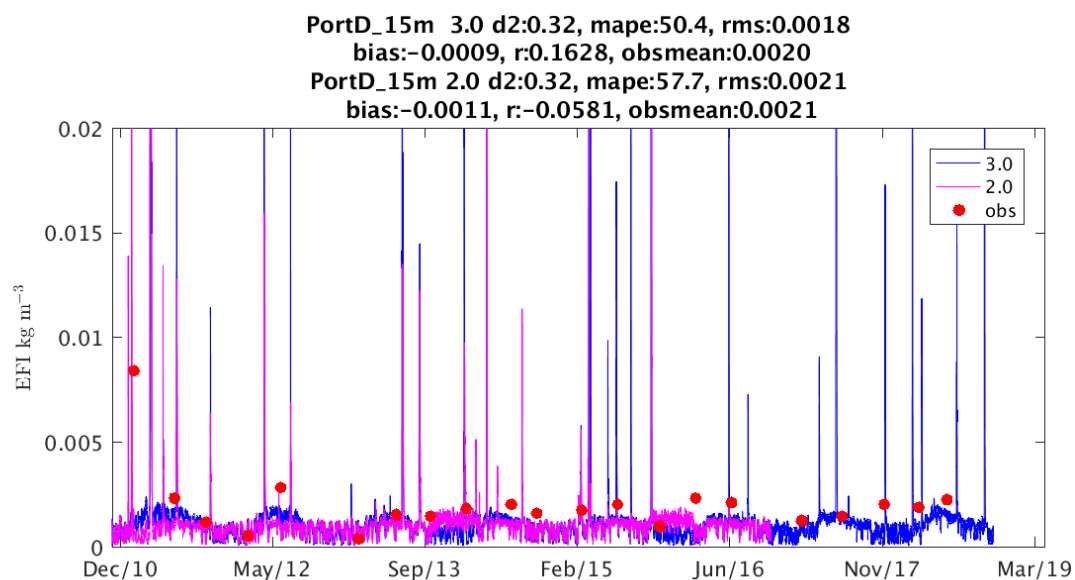

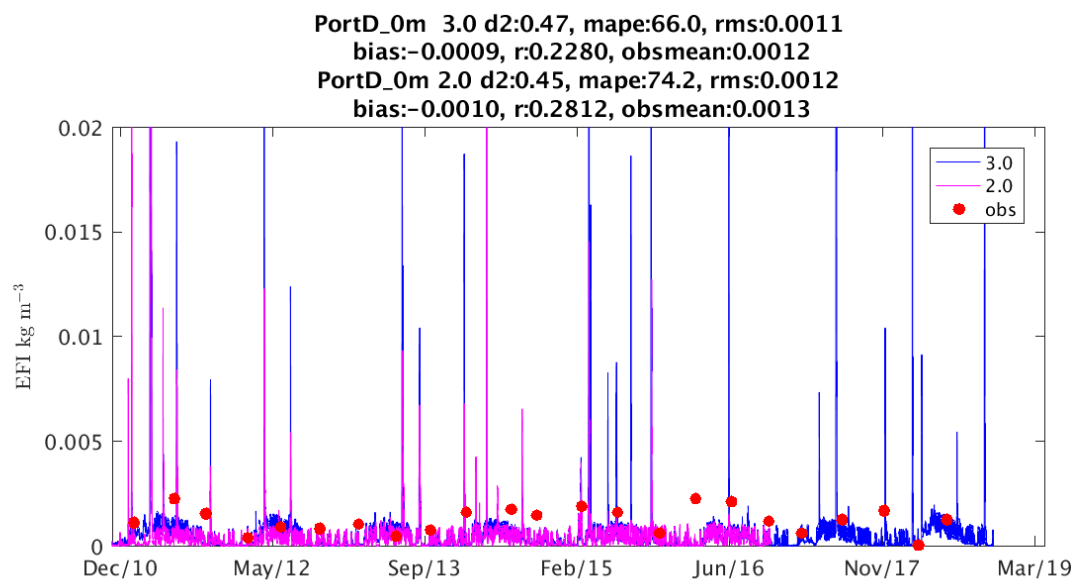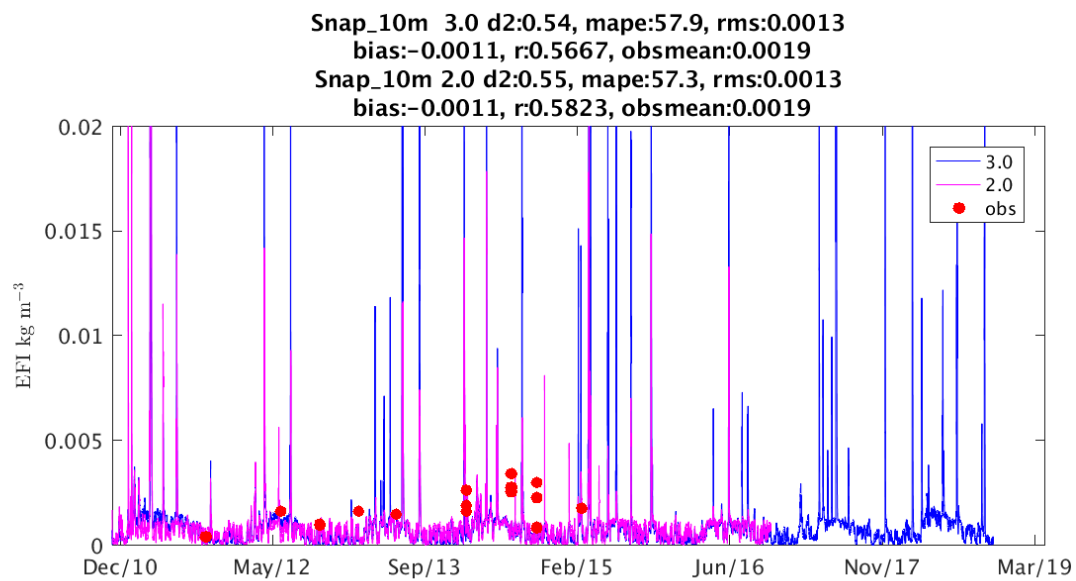

## 18. Simulated Chl *a* assessment against IMOS NRS HPLC Chl *a*

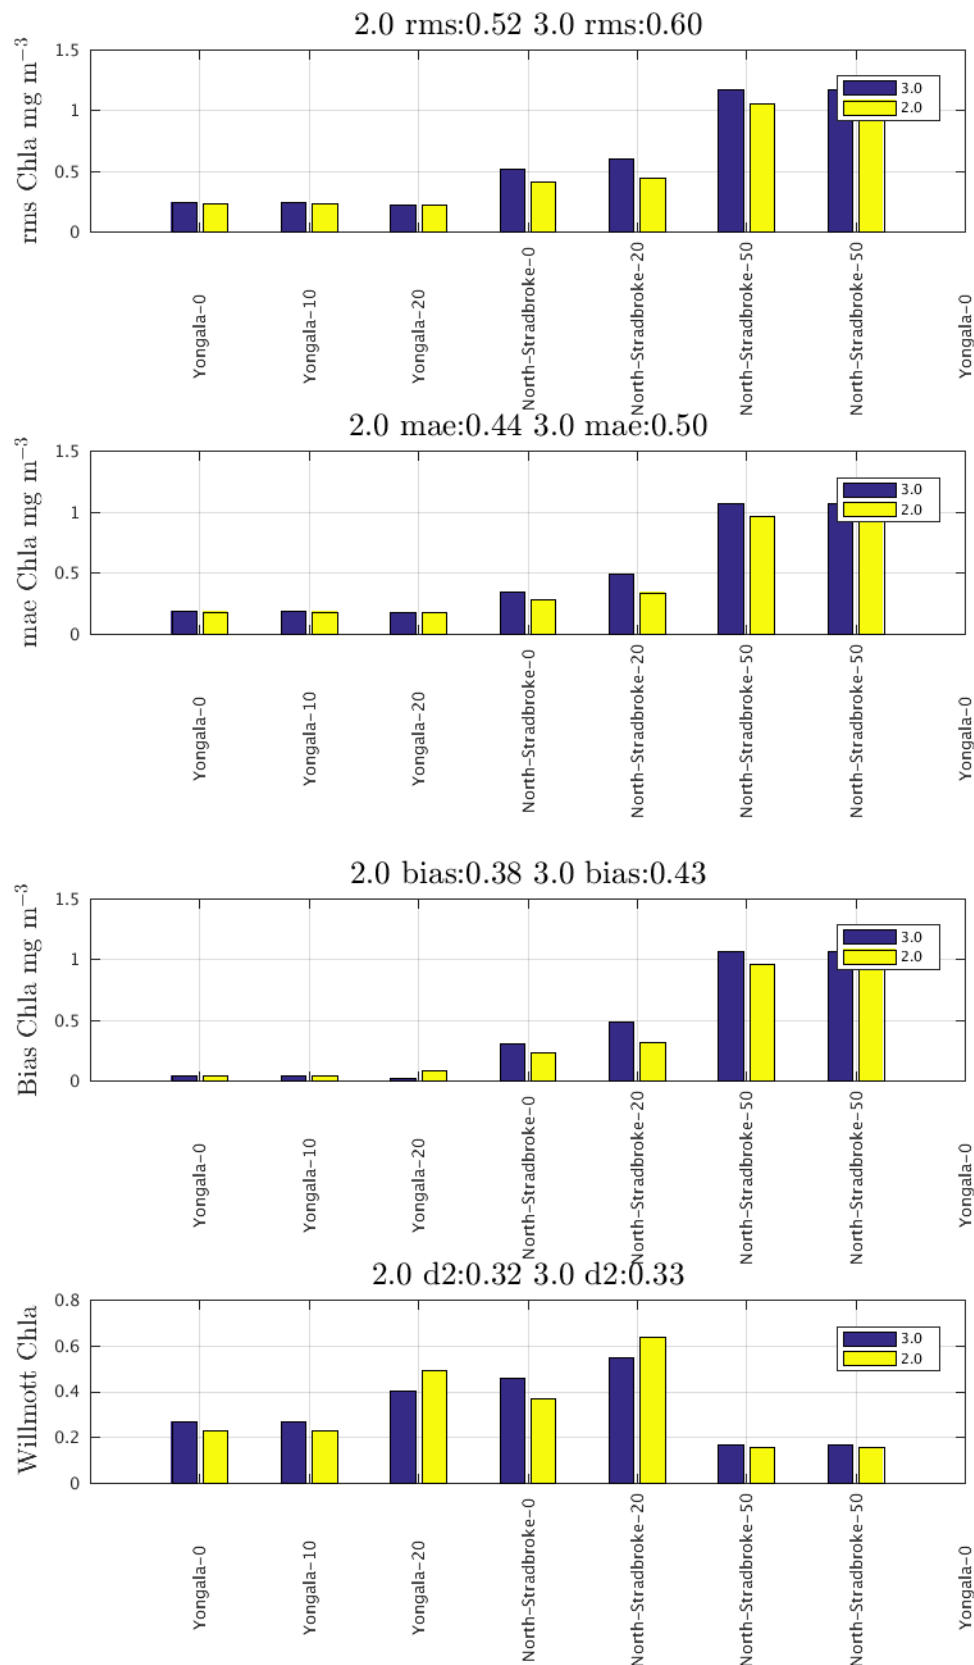

Figure 13 Metrics for IMOS NRS sites Chlorophyll assessment against observations for model version 3p0 and 2p0 d2 = Willmott index see Statistical metric page 27.mae:mean absolute error, rms root mean square

North\_Stradbroke\_50 3.0 d2:0.17, mape:2287.1, rms:1.1762  
 bias:1.0697, r:0.2079, obsmean:0.1346  
 North\_Stradbroke\_50 2.0 d2:0.16, mape:2140.4, rms:1.0548  
 bias:0.9647, r:0.1397, obsmean:0.1242

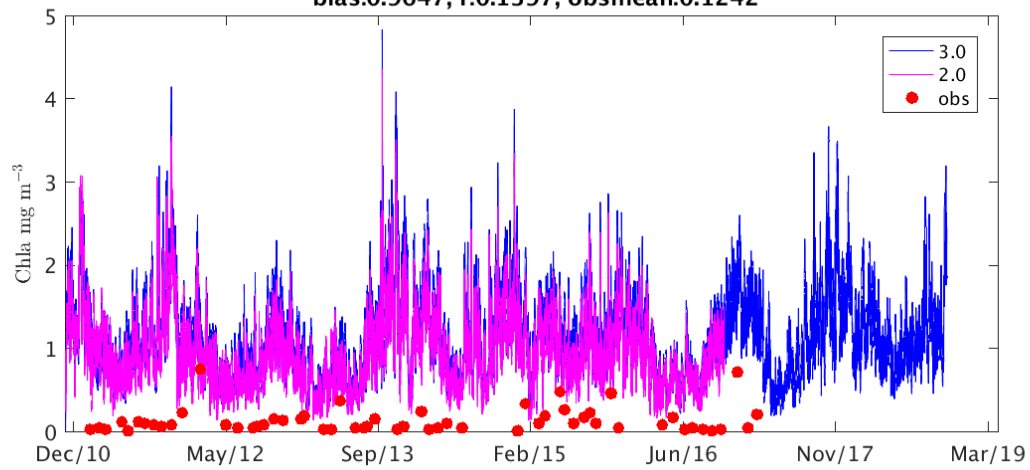

North\_Stradbroke\_20 3.0 d2:0.55, mape:296.5, rms:0.6018  
 bias:0.4862, r:0.6304, obsmean:0.2812  
 North\_Stradbroke\_20 2.0 d2:0.64, mape:208.7, rms:0.4469  
 bias:0.3178, r:0.5934, obsmean:0.2975

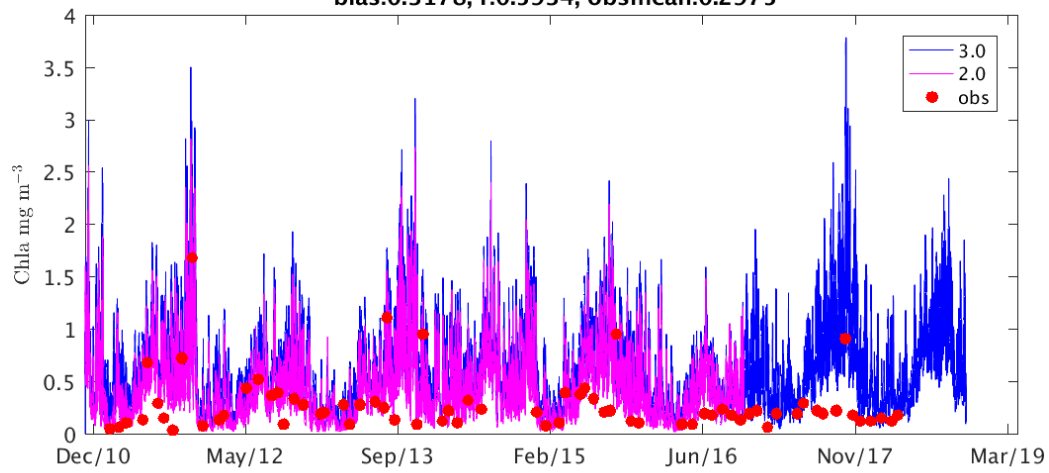

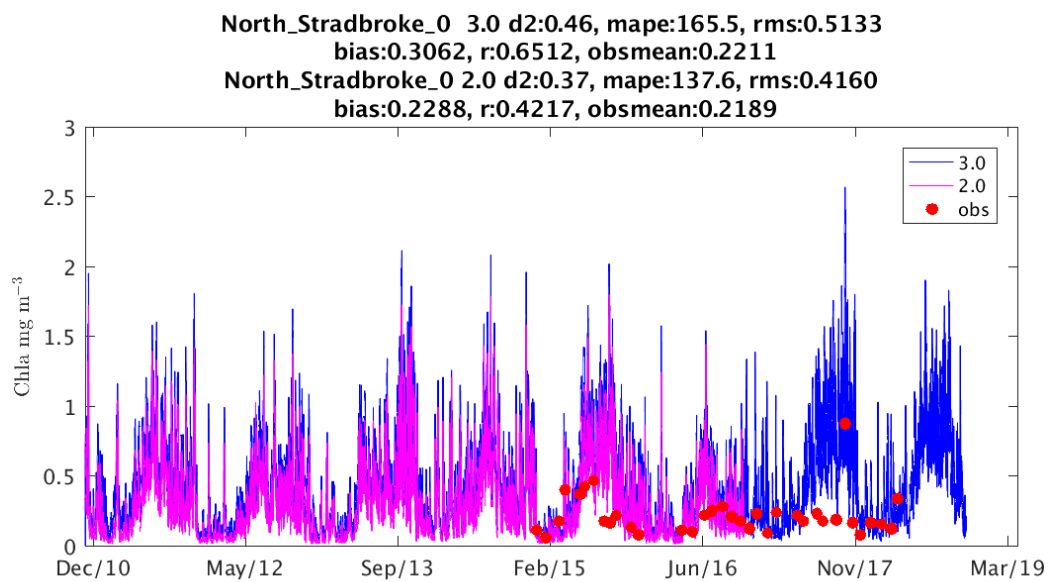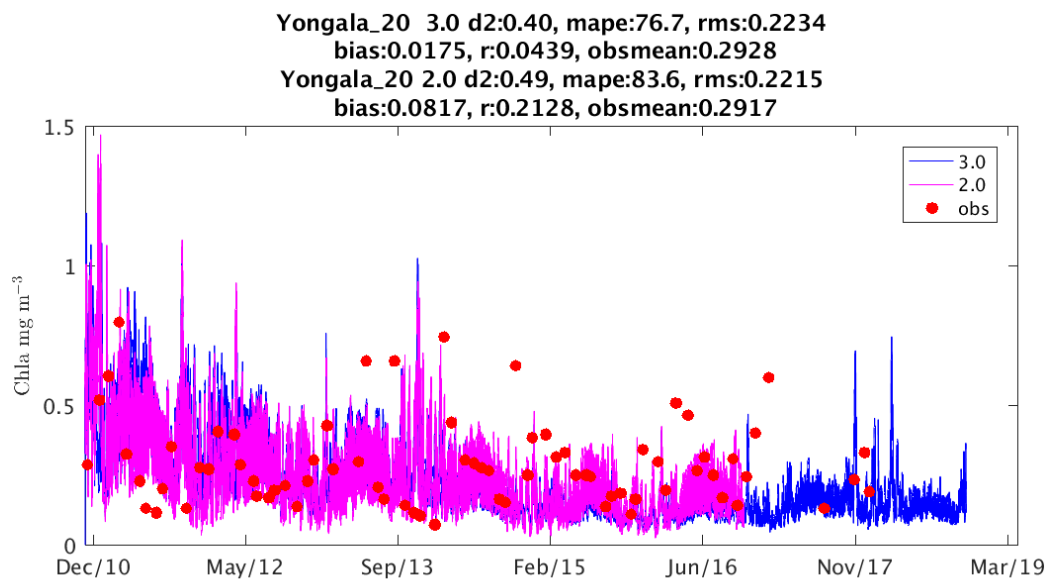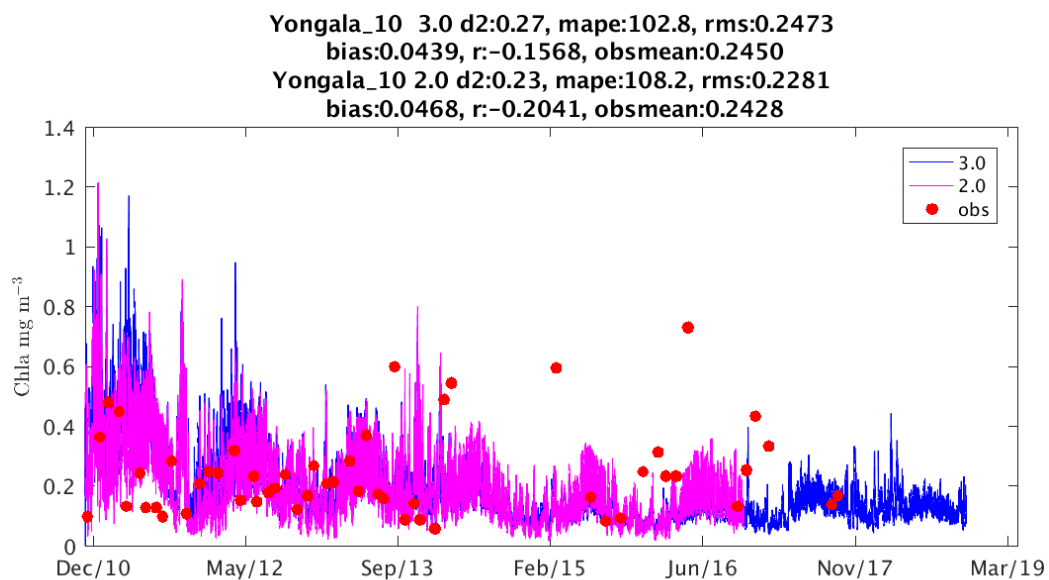



## 19. Simulated Chl *a* and fluorescence assessment against AIMS MMP fluorescence

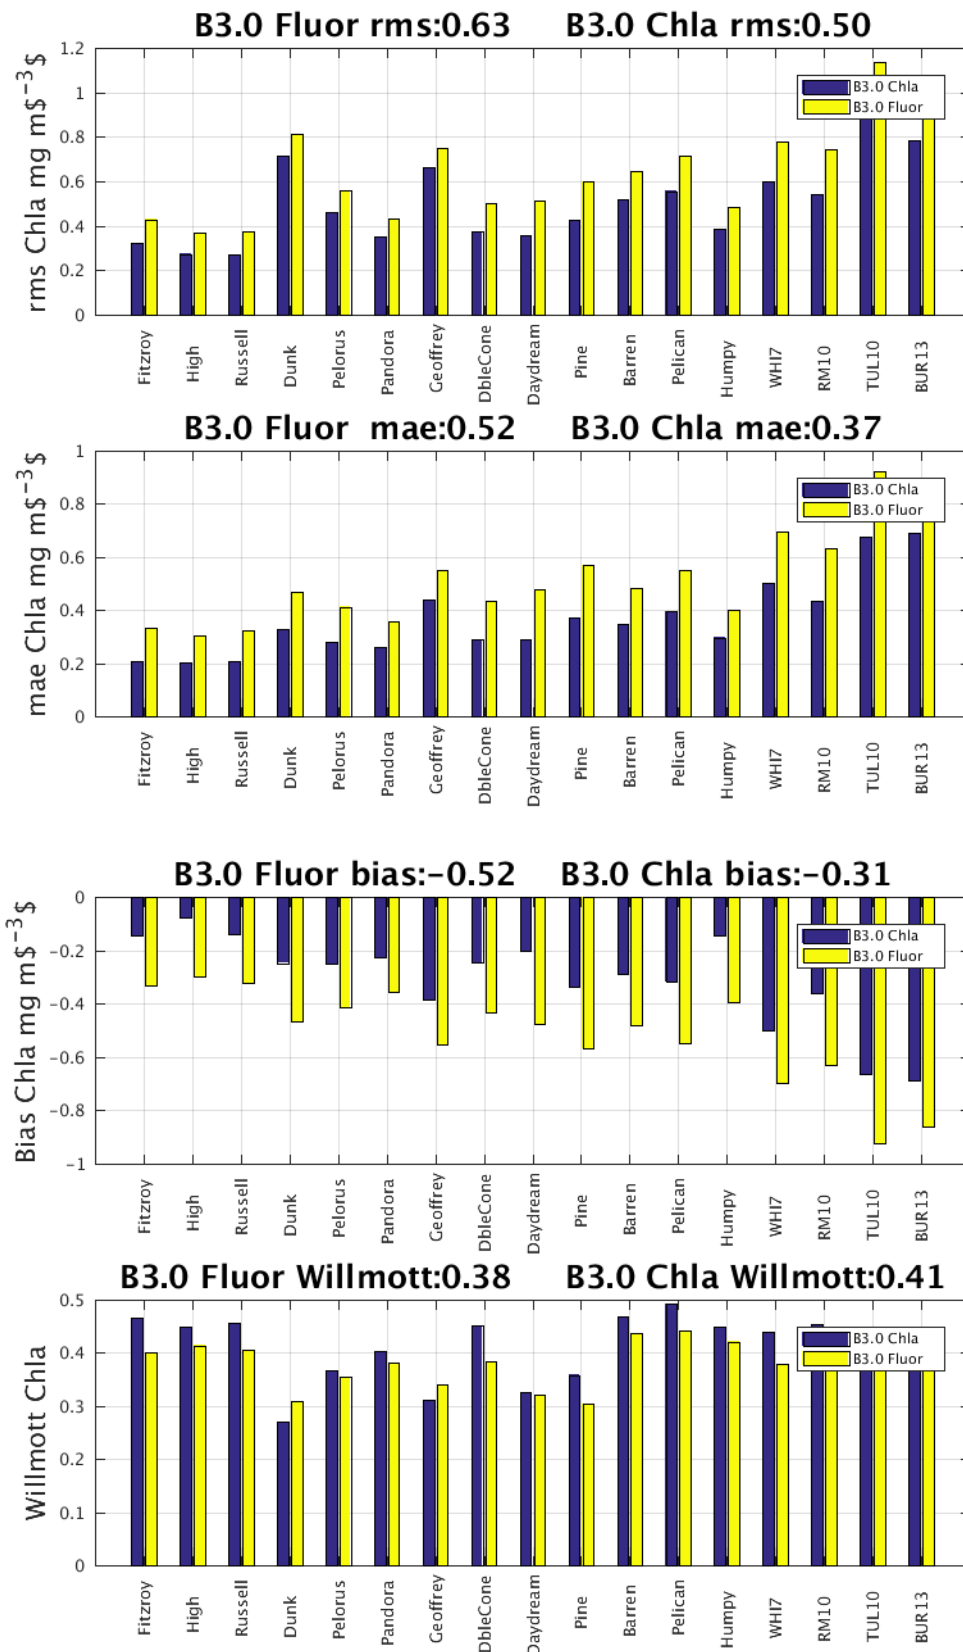

Figure 14 Metrics for AIMS MMP fluorescence against Chl *a* and fluorescence for model version 3p0 and 2p0 d2  
 = Willmott index see Statistical metric page 27.mae:mean absolute error, rms root mean square

**BUR13 B3.0 Chla Willmott:0.42, mape:70.1, rms:0.79**  
 bias:-0.69, r:0.26, obsmean:0.95  
**BUR13 B3.0 Fluor Willmott:0.37, mape:89.8, rms:0.94**  
 bias:-0.86, r:0.25, obsmean:0.95

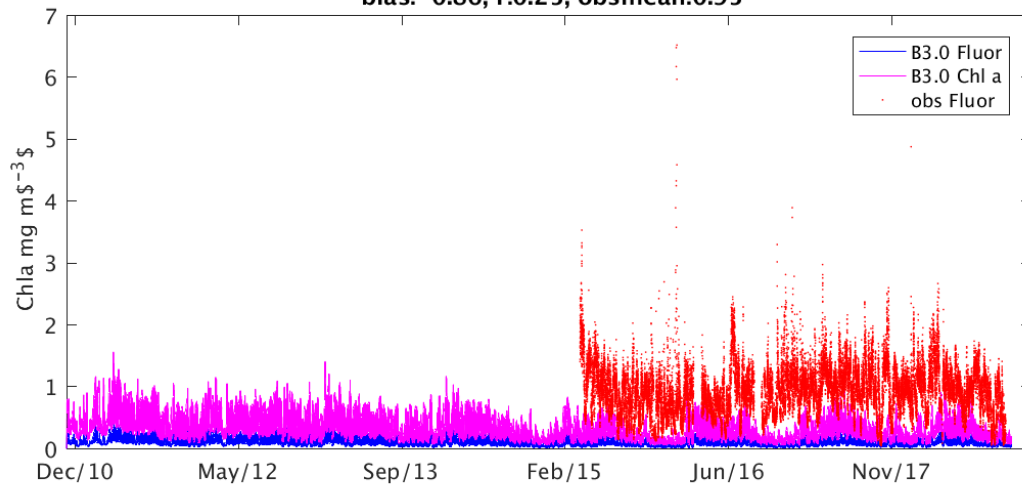

**TUL10 B3.0 Chla Willmott:0.39, mape:58.1, rms:0.94**  
 bias:-0.66, r:0.09, obsmean:1.05  
**TUL10 B3.0 Fluor Willmott:0.37, mape:84.6, rms:1.14**  
 bias:-0.92, r:0.08, obsmean:1.05

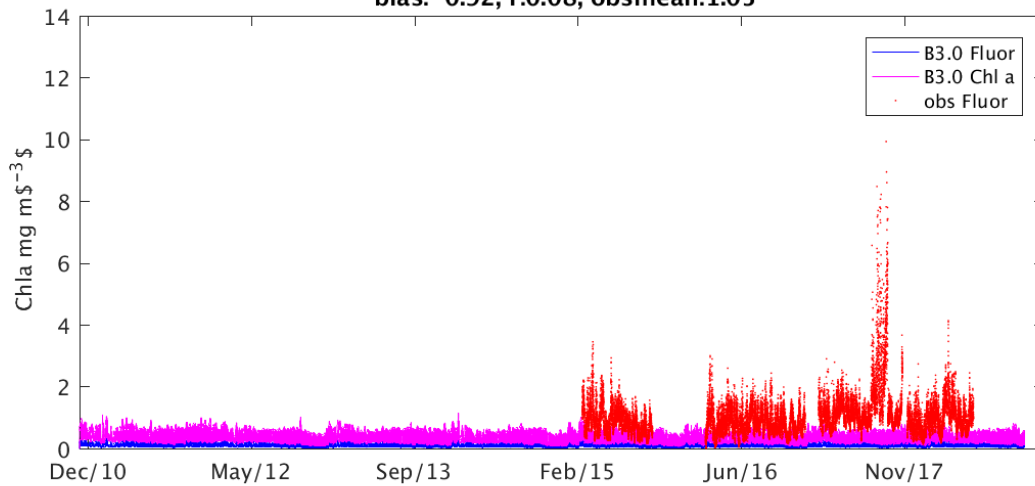

**RM10 B3.0 Chla Willmott:0.45, mape:66.6, rms:0.54**  
 bias:-0.36, r:0.14, obsmean:0.76  
**RM10 B3.0 Fluor Willmott:0.42, mape:79.3, rms:0.74**  
 bias:-0.63, r:0.11, obsmean:0.76

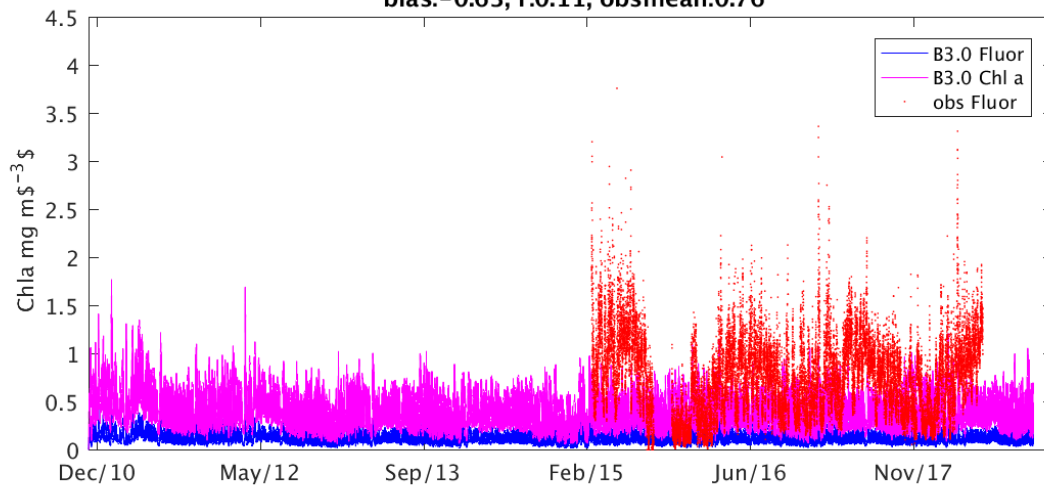

WHI7 B3.0 Chla Willmott:0.44, mape:59.4, rms:0.60  
 bias:-0.50, r:0.32, obsmean:0.79  
 WHI7 B3.0 Fluor Willmott:0.38, mape:86.8, rms:0.78  
 bias:-0.70, r:0.30, obsmean:0.79

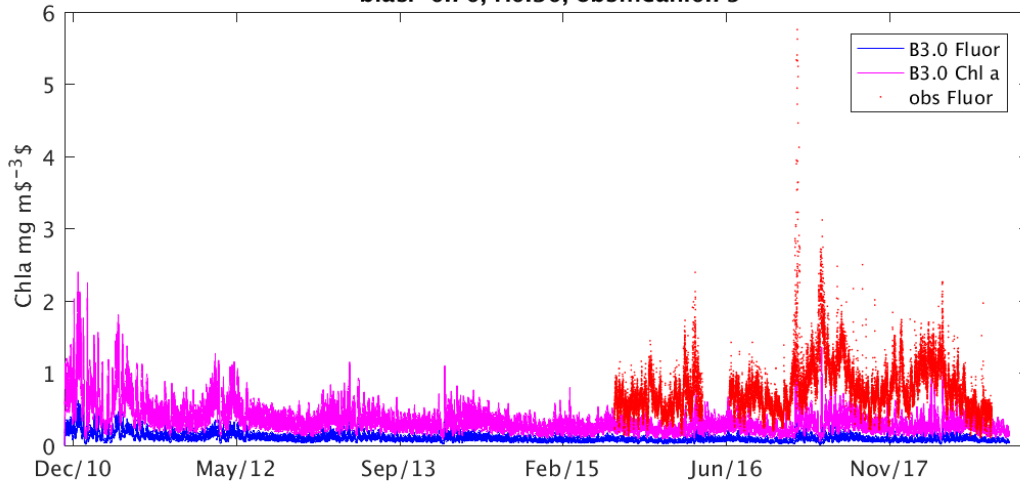

Humpy\_5m B3.0 Chla Willmott:0.45, mape:74.5, rms:0.39  
 bias:-0.15, r:0.10, obsmean:0.50  
 Humpy\_5m B3.0 Fluor Willmott:0.42, mape:76.1, rms:0.49  
 bias:-0.39, r:0.09, obsmean:0.50

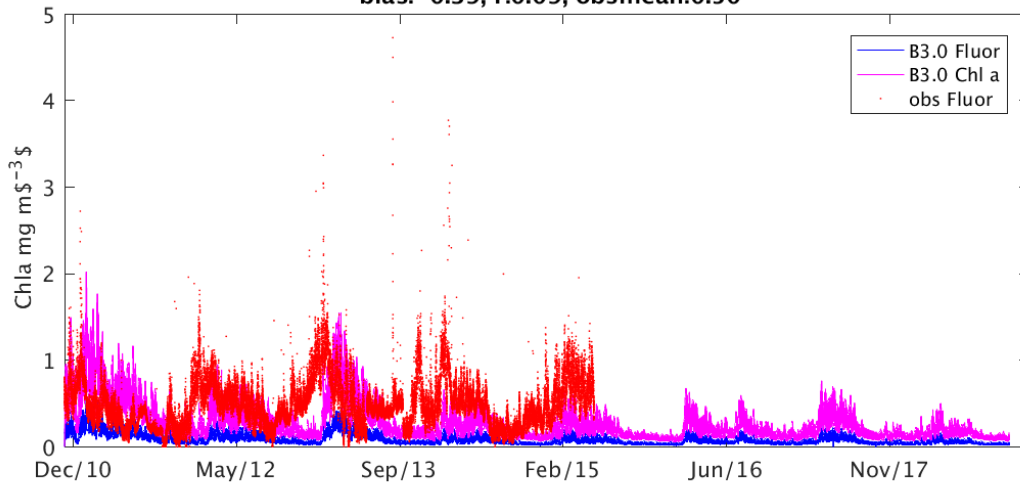

Pelican\_5m B3.0 Chla Willmott:0.49, mape:82.2, rms:0.56  
 bias:-0.32, r:0.31, obsmean:0.65  
 Pelican\_5m B3.0 Fluor Willmott:0.44, mape:83.0, rms:0.71  
 bias:-0.55, r:0.31, obsmean:0.65

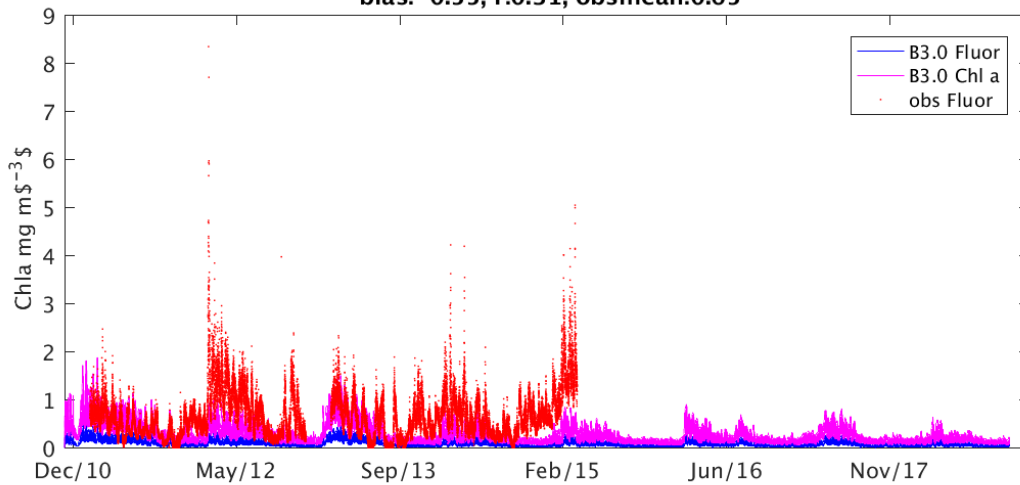

**Barren\_5m B3.0 Chla Willmott:0.47, mape:56.6, rms:0.52**  
**bias:-0.29, r:0.25, obsmean:0.57**

**Barren\_5m B3.0 Fluor Willmott:0.44, mape:77.7, rms:0.65**  
**bias:-0.48, r:0.24, obsmean:0.57**

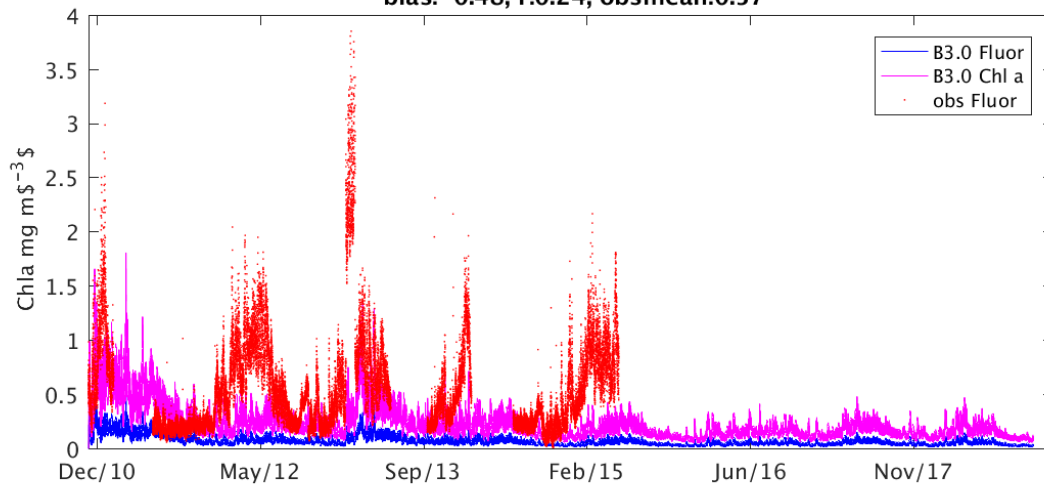

**Pine\_5m B3.0 Chla Willmott:0.36, mape:53.1, rms:0.43**  
**bias:-0.34, r:-0.01, obsmean:0.67**

**Pine\_5m B3.0 Fluor Willmott:0.30, mape:83.6, rms:0.60**  
**bias:-0.57, r:-0.01, obsmean:0.67**

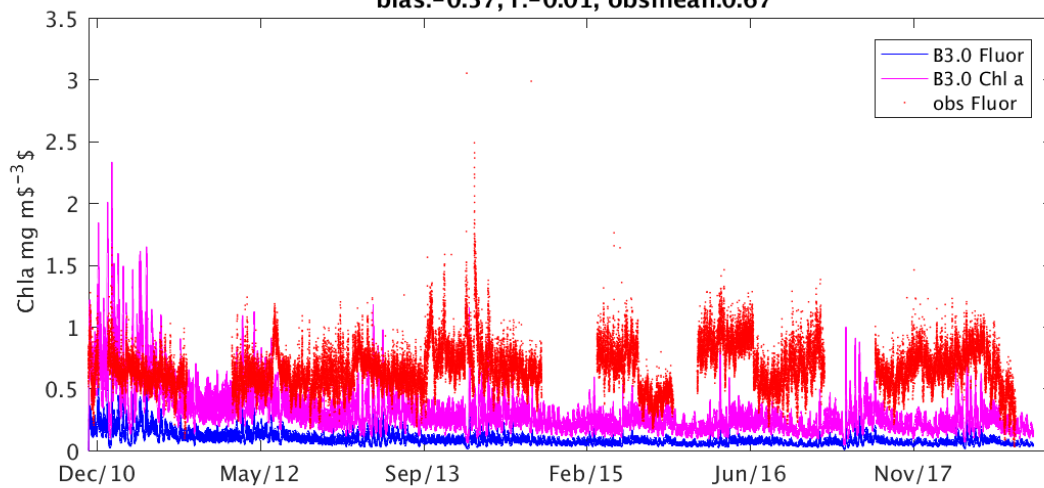

**Daydream\_5m B3.0 Chla Willmott:0.33, mape:47.0, rms:0.36**  
**bias:-0.20, r:-0.14, obsmean:0.60**

**Daydream\_5m B3.0 Fluor Willmott:0.32, mape:77.9, rms:0.52**  
**bias:-0.48, r:-0.13, obsmean:0.60**

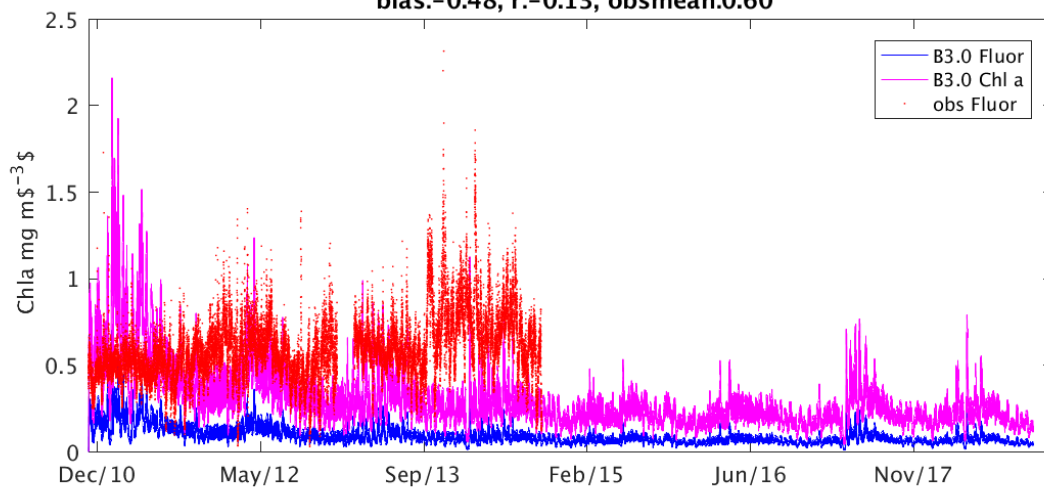

**DoubleCone\_5m B3.0 Chla Willmott:0.45, mape:56.5, rms:0.38**

**bias:-0.24, r:0.17, obsmean:0.52**

**DoubleCone\_5m B3.0 Fluor Willmott:0.38, mape:81.4, rms:0.50**

**bias:-0.43, r:0.16, obsmean:0.52**

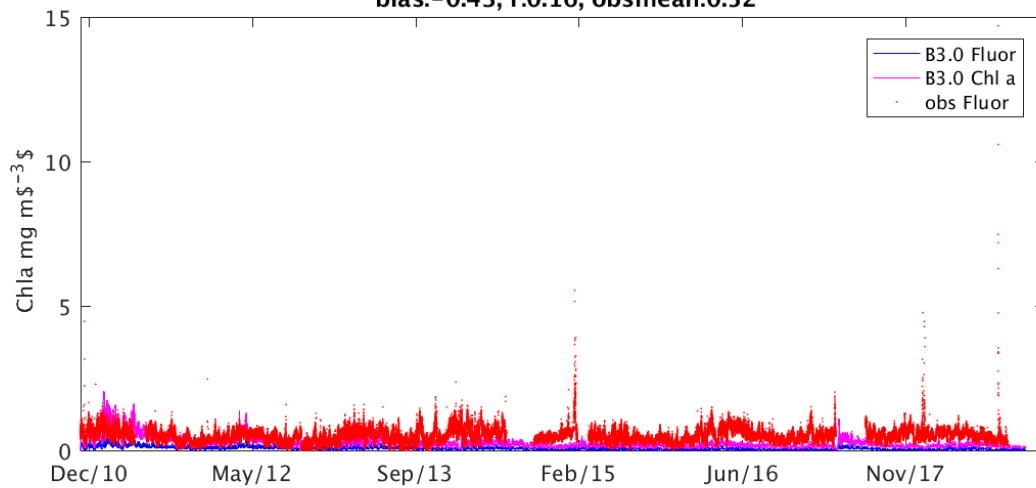

**GeoffreyBay336\_5m B3.0 Chla Willmott:0.31, mape:70.2, rms:0.66**

**bias:-0.39, r:-0.07, obsmean:0.63**

**GeoffreyBay336\_5m B3.0 Fluor Willmott:0.34, mape:83.4, rms:0.75**

**bias:-0.55, r:-0.06, obsmean:0.63**

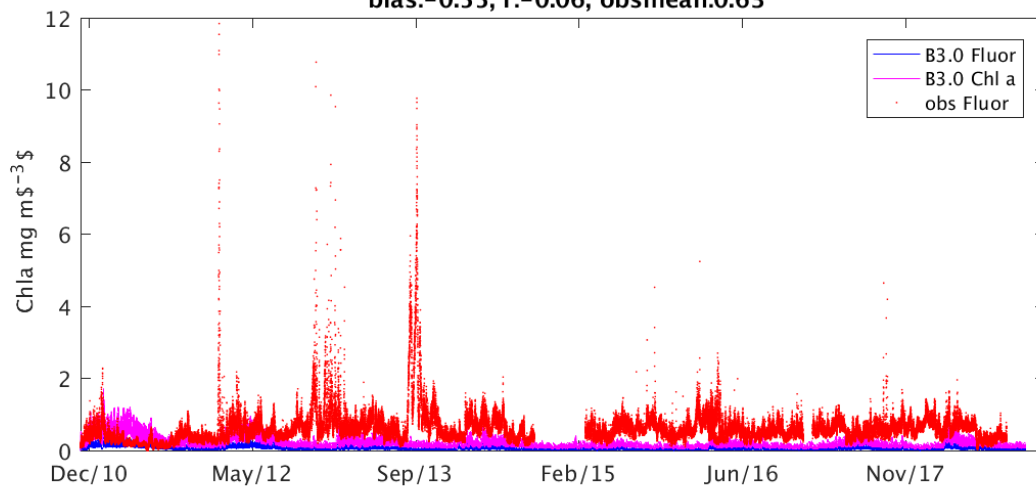

**Pandora\_5m B3.0 Chla Willmott:0.40, mape:59.9, rms:0.35**

**bias:-0.23, r:0.09, obsmean:0.41**

**Pandora\_5m B3.0 Fluor Willmott:0.38, mape:82.5, rms:0.43**

**bias:-0.36, r:0.09, obsmean:0.41**

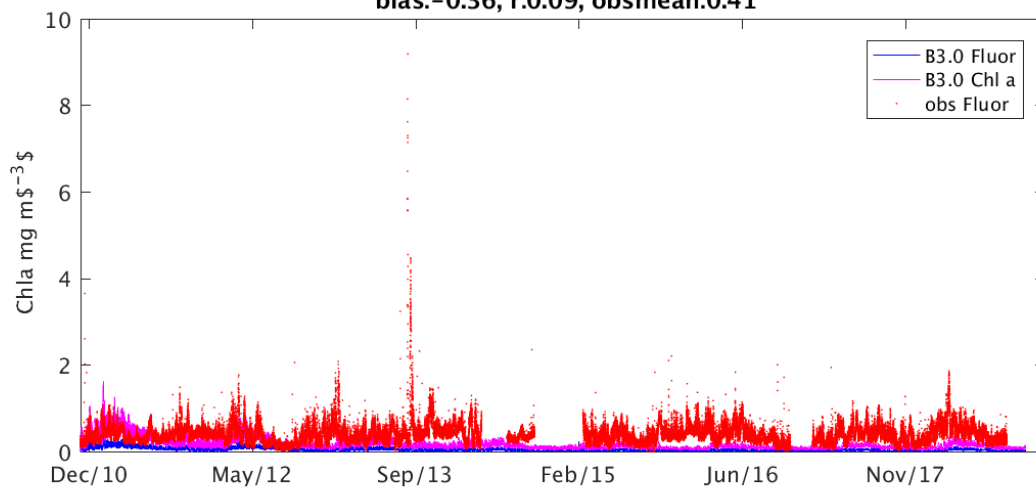

**Pelorus\_5m B3.0 Chla Willmott:0.37, mape:53.1, rms:0.46**

**bias:-0.25, r:0.11, obsmean:0.49**

**Pelorus\_5m B3.0 Fluor Willmott:0.35, mape:80.9, rms:0.56**

**bias:-0.41, r:0.10, obsmean:0.49**

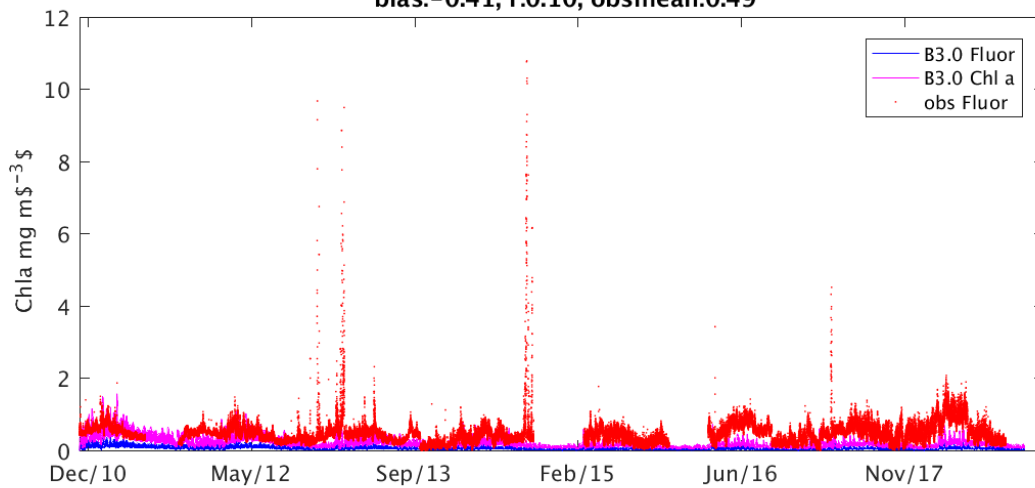

**Dunk859\_5m B3.0 Chla Willmott:0.27, mape:93.6, rms:0.72**

**bias:-0.25, r:0.09, obsmean:0.57**

**Dunk859\_5m B3.0 Fluor Willmott:0.31, mape:83.3, rms:0.81**

**bias:-0.46, r:0.08, obsmean:0.57**

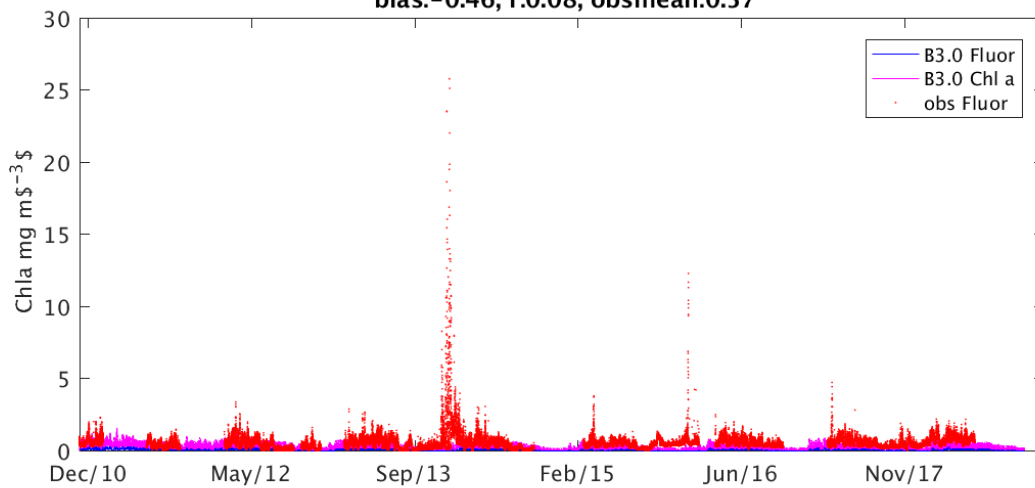

**Russell\_5m B3.0 Chla Willmott:0.46, mape:58.4, rms:0.27**

**bias:-0.14, r:0.14, obsmean:0.41**

**Russell\_5m B3.0 Fluor Willmott:0.40, mape:77.0, rms:0.38**

**bias:-0.32, r:0.14, obsmean:0.41**

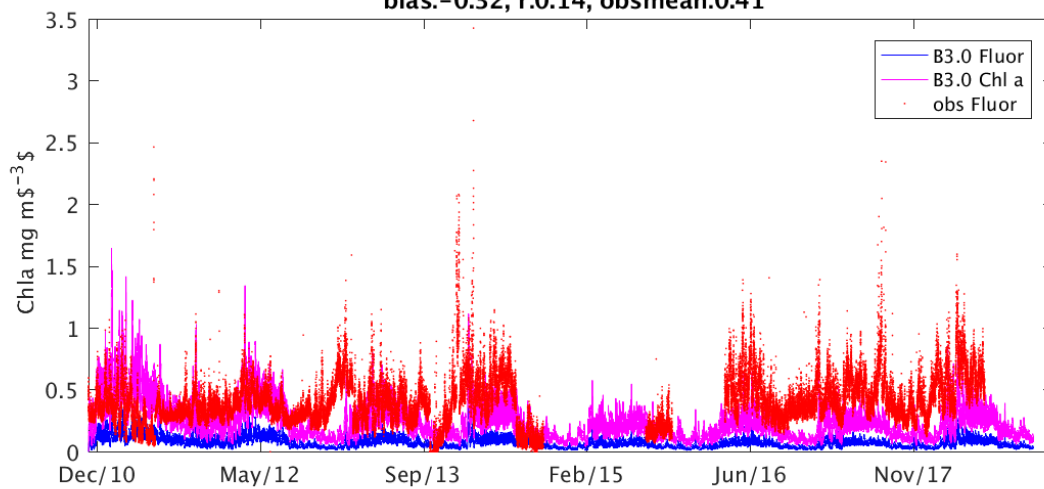

High\_5m B3.0 Chla Willmott:0.45, mape:72.4, rms:0.27

bias:-0.08, r:0.14, obsmean:0.40

High\_5m B3.0 Fluor Willmott:0.41, mape:74.6, rms:0.37

bias:-0.30, r:0.13, obsmean:0.40

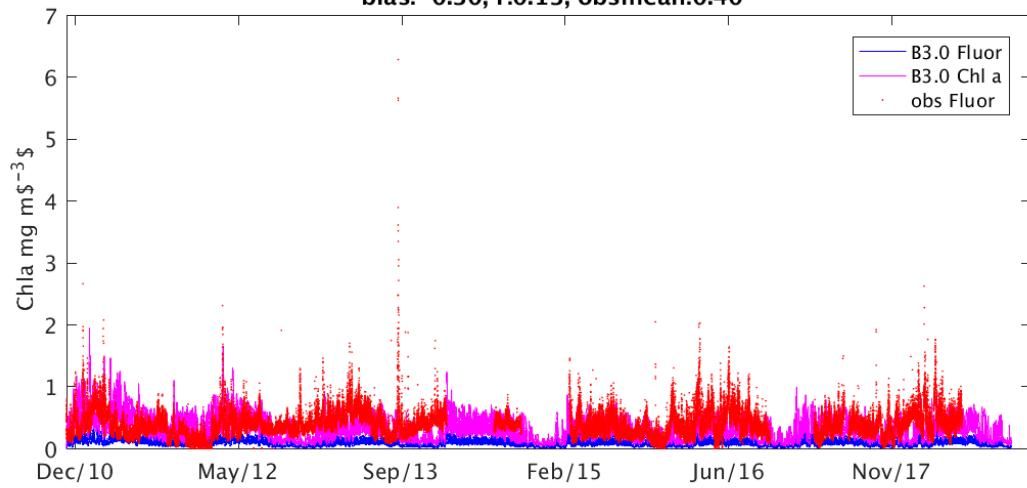

Fitz\_5m B3.0 Chla Willmott:0.47, mape:50.5, rms:0.32

bias:-0.15, r:0.24, obsmean:0.42

Fitz\_5m B3.0 Fluor Willmott:0.40, mape:76.3, rms:0.43

bias:-0.33, r:0.23, obsmean:0.42

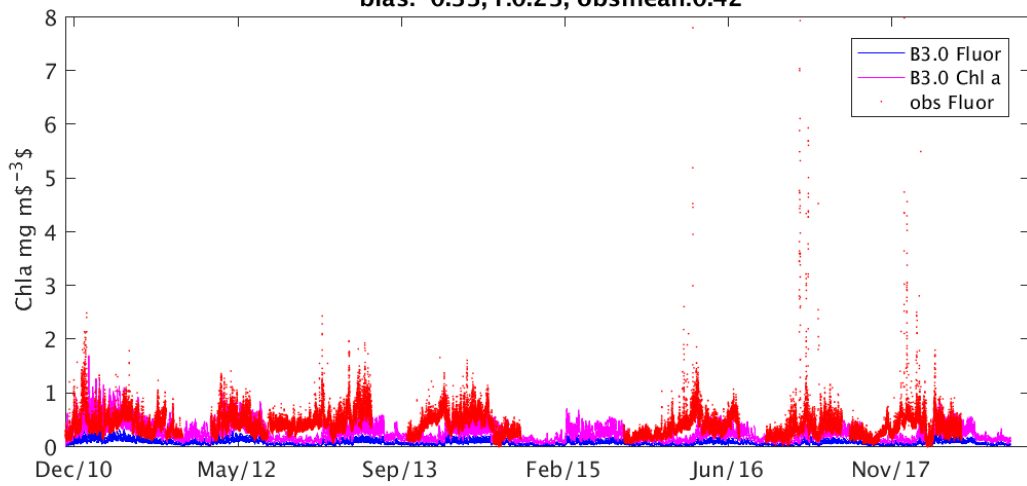



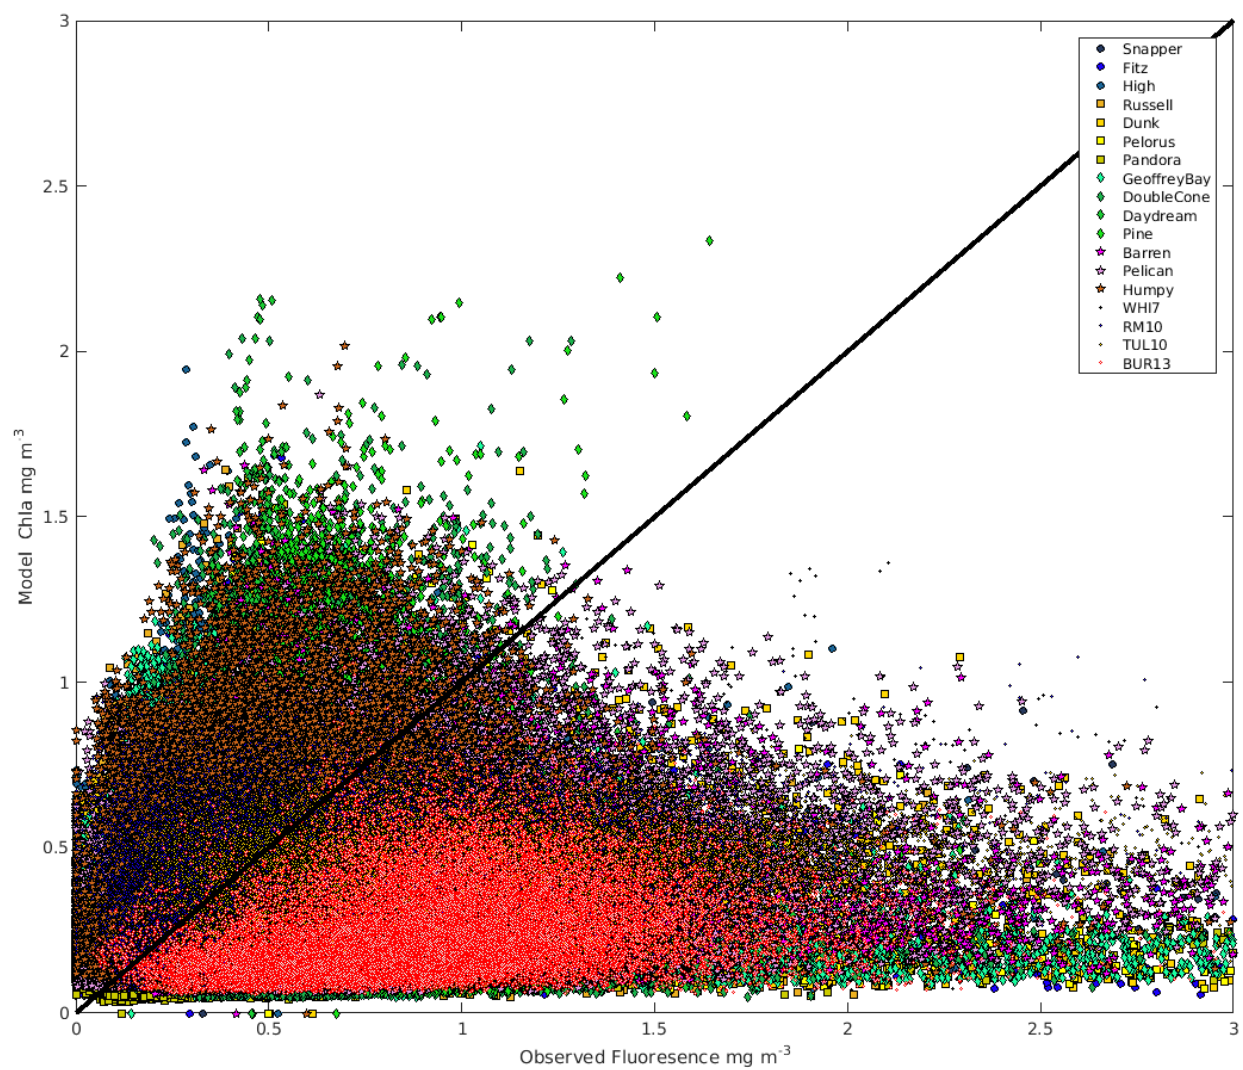

Figure 15 Scatter plot of observed Fluorescence for AIMS MMP assessment against simulated Chl a for model version 3p0



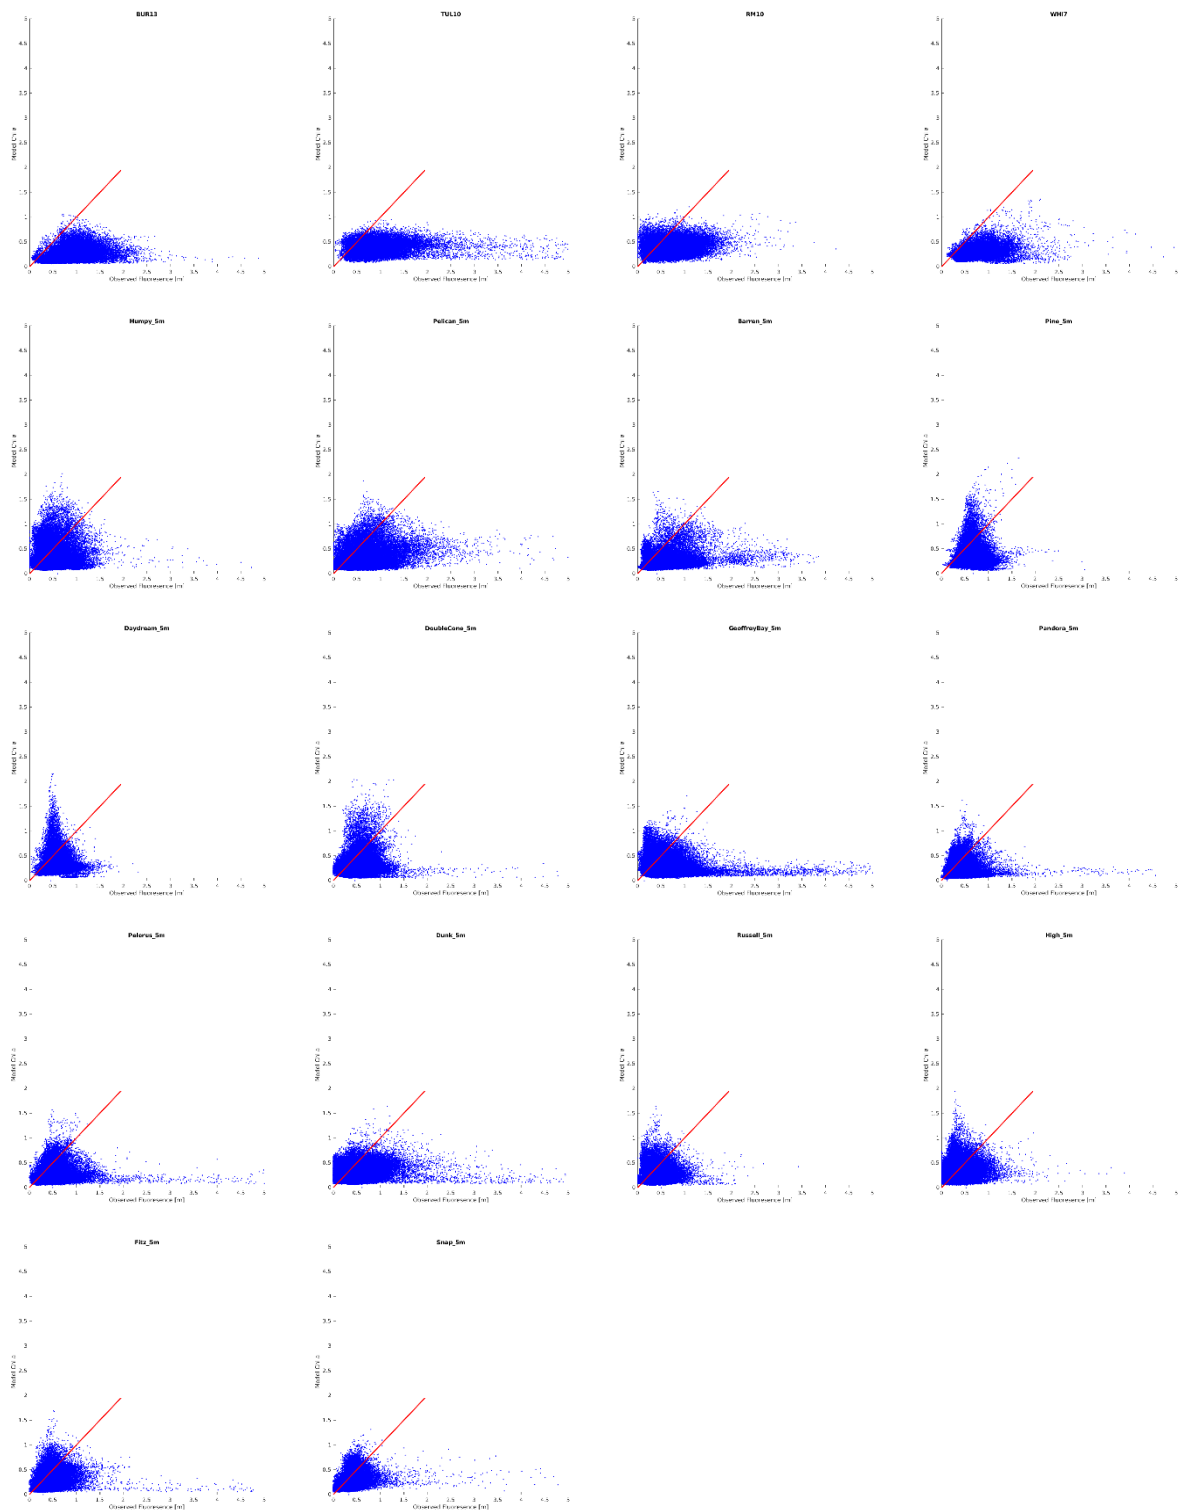

## 20. Simulated Turbidity assessment against AIMS MMP Turbidity

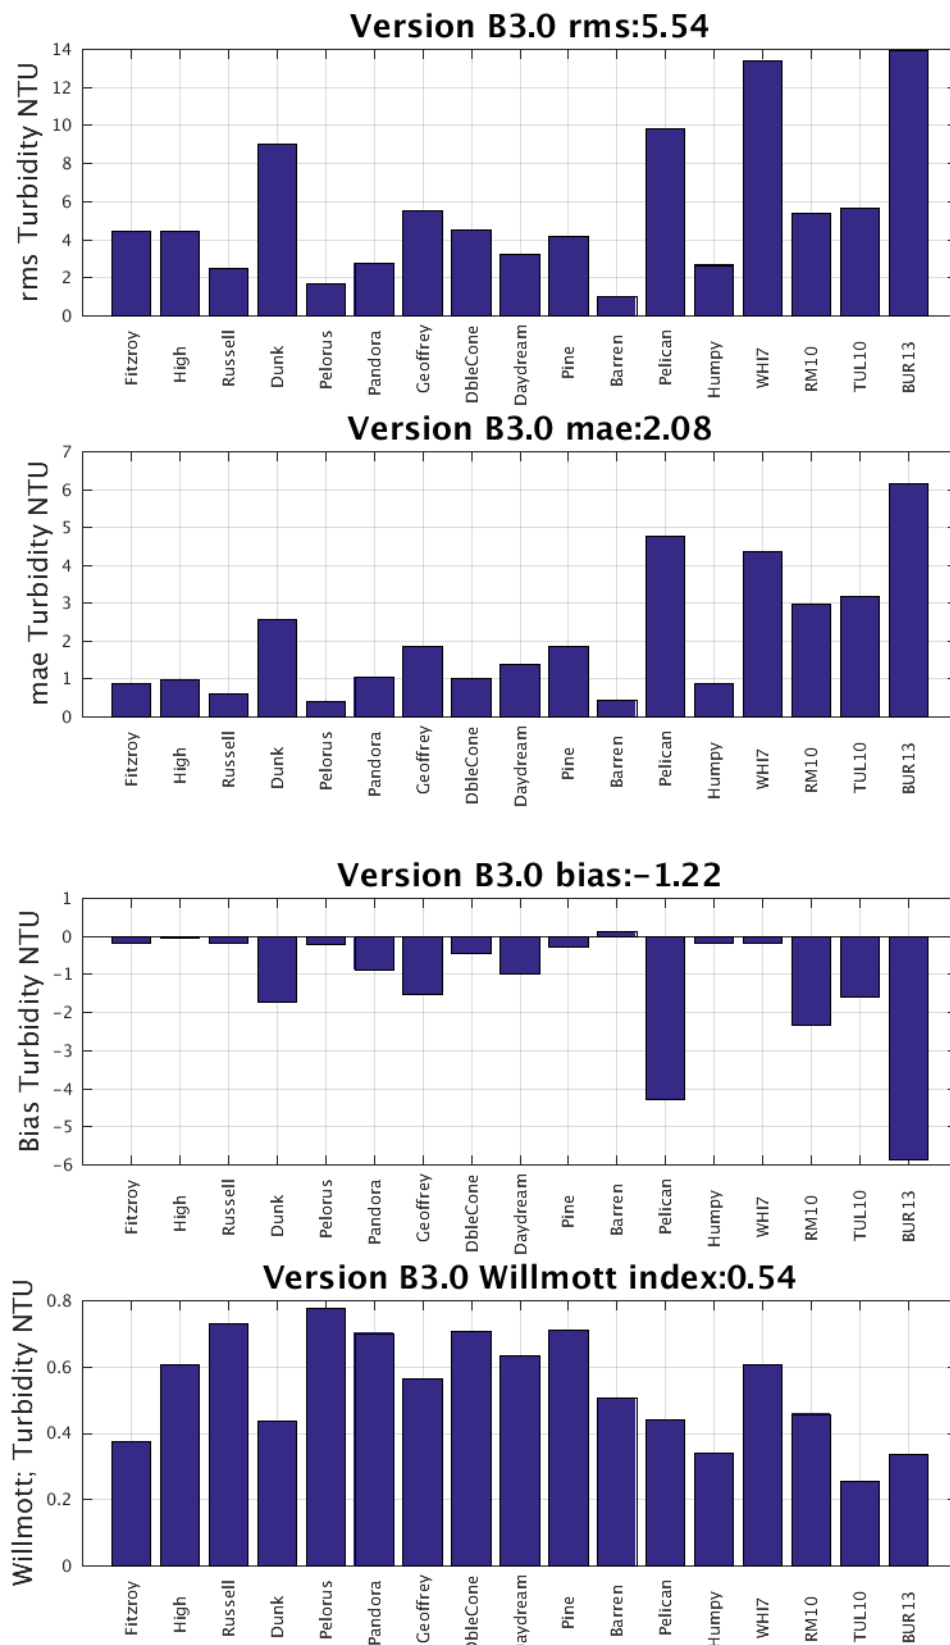

Figure 16 Metrics for AIMS MMP turbidity against simulated turbidity Dec 2010 to November 2018 for model version 3p0 d2 = Willmott index see Statistical metric page 27.mae:mean absolute error, rms root mean square

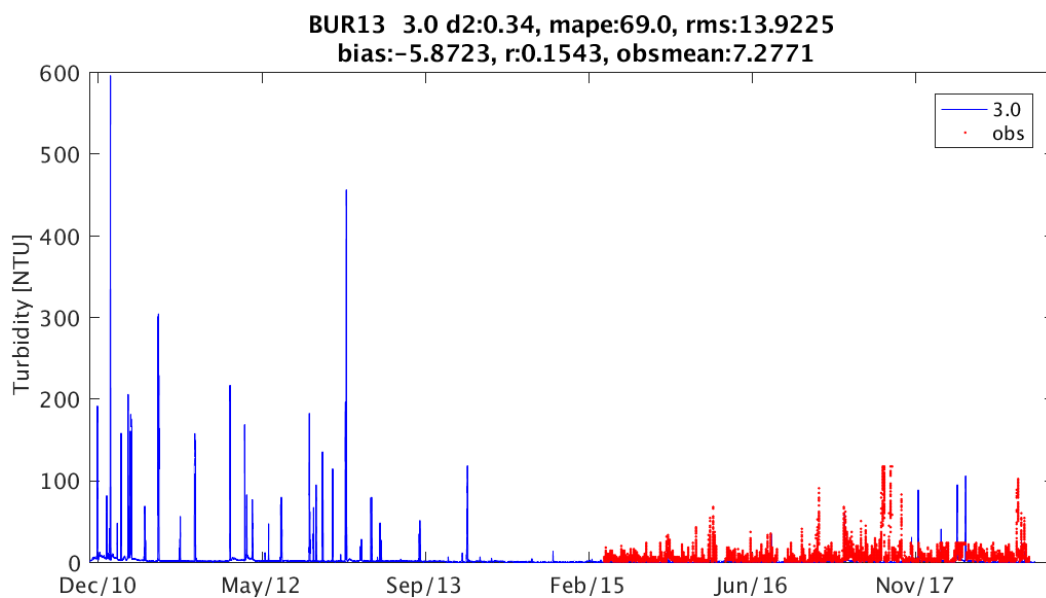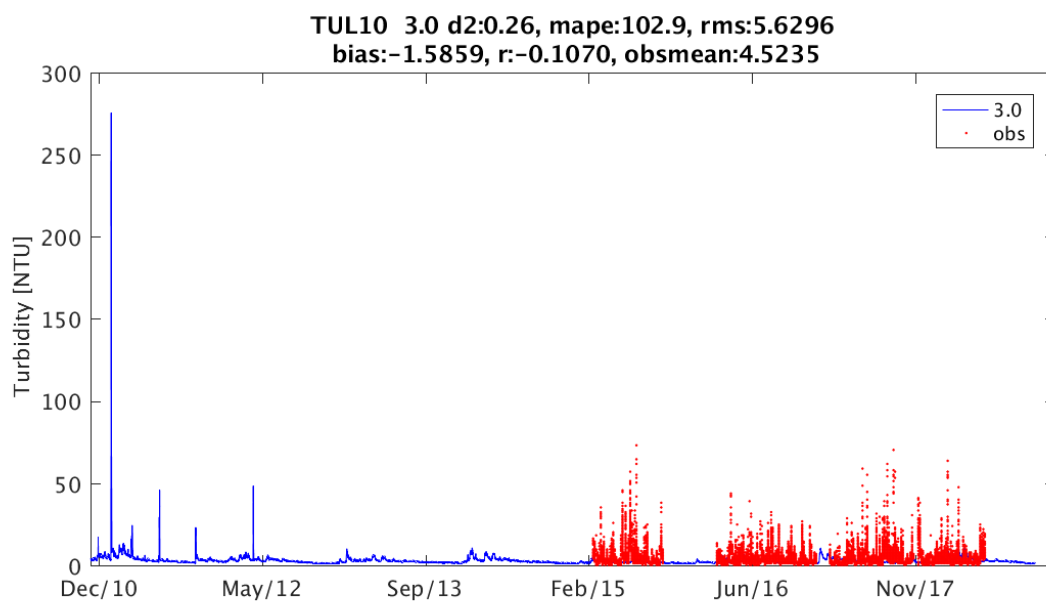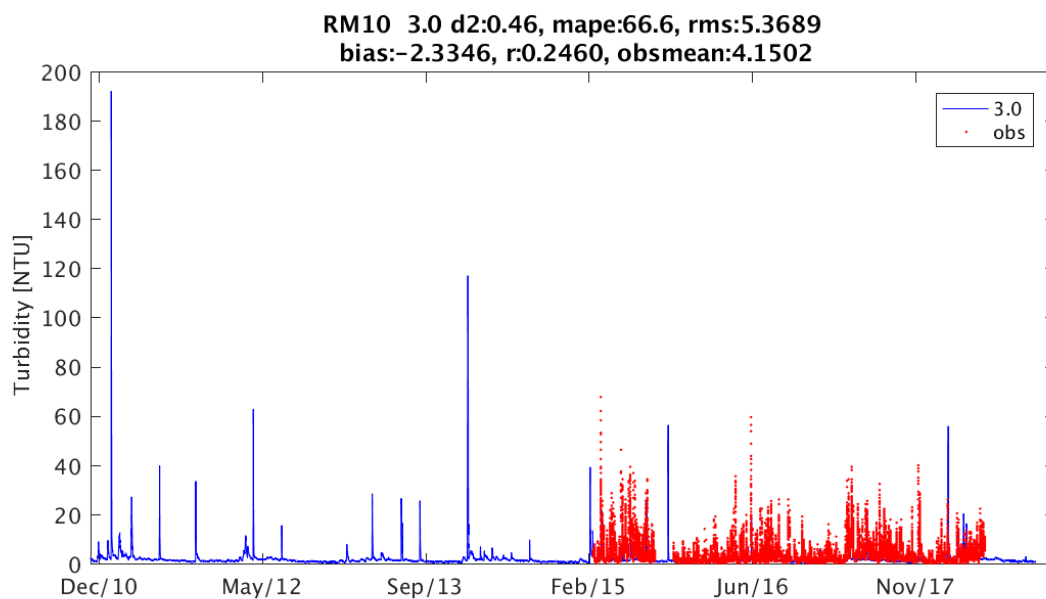

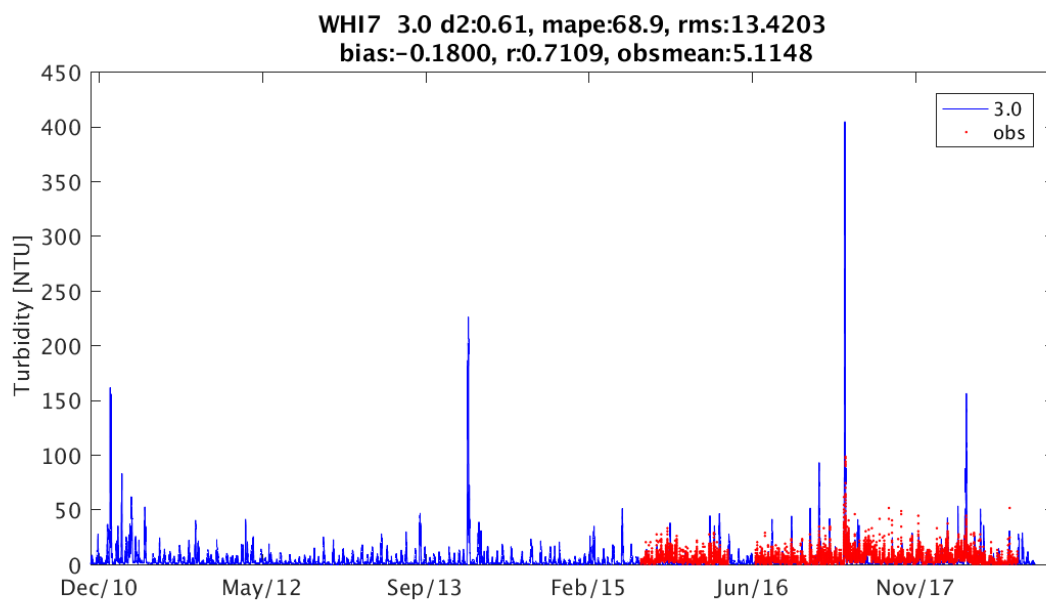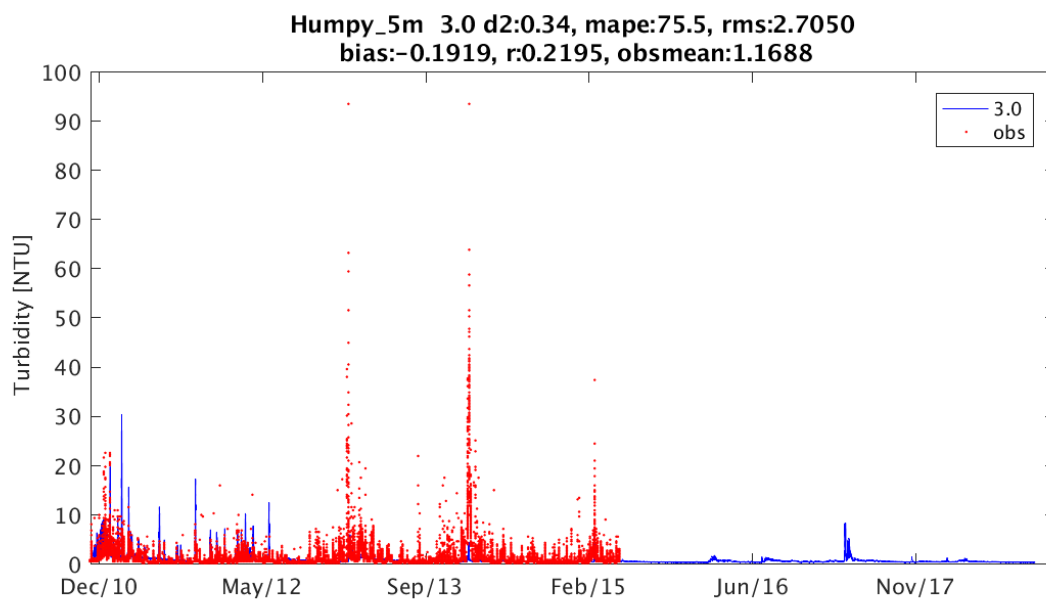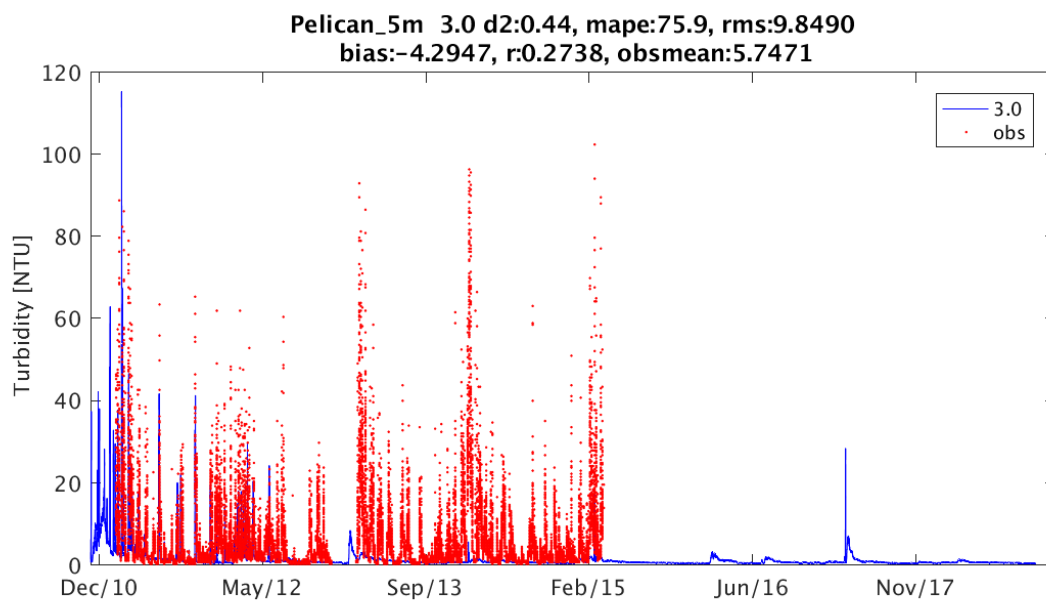

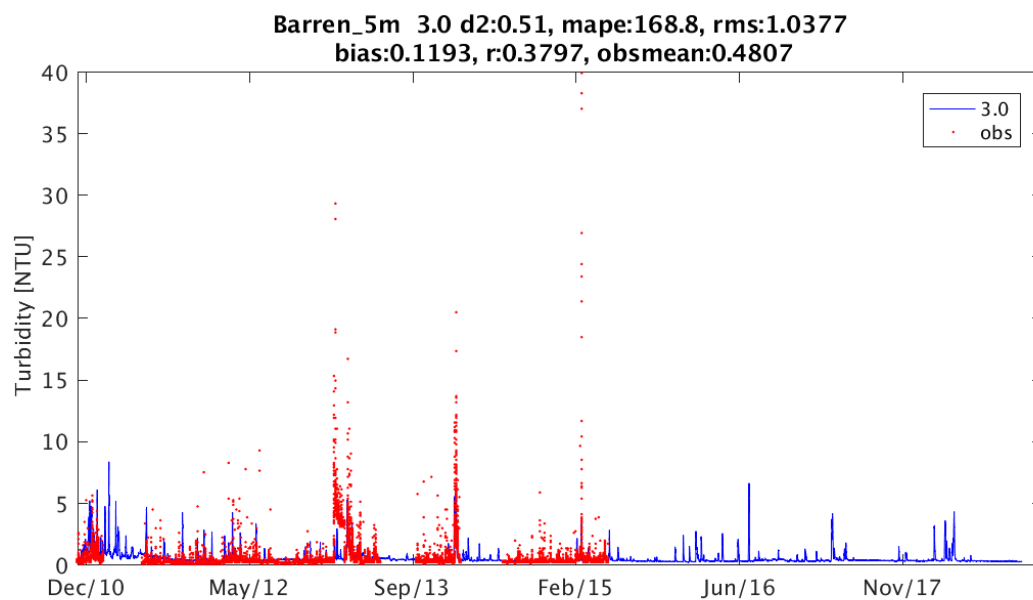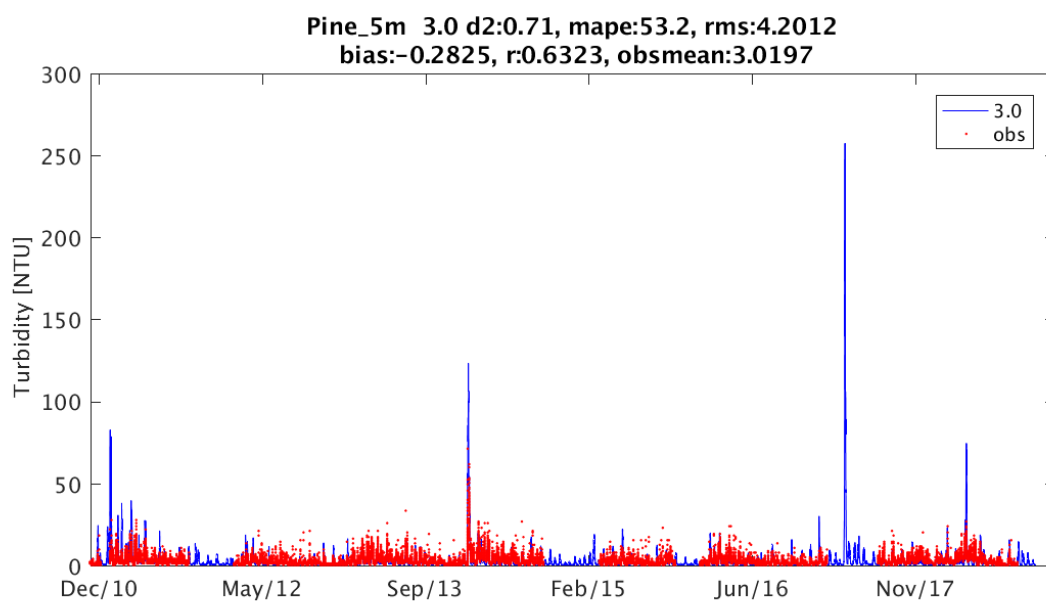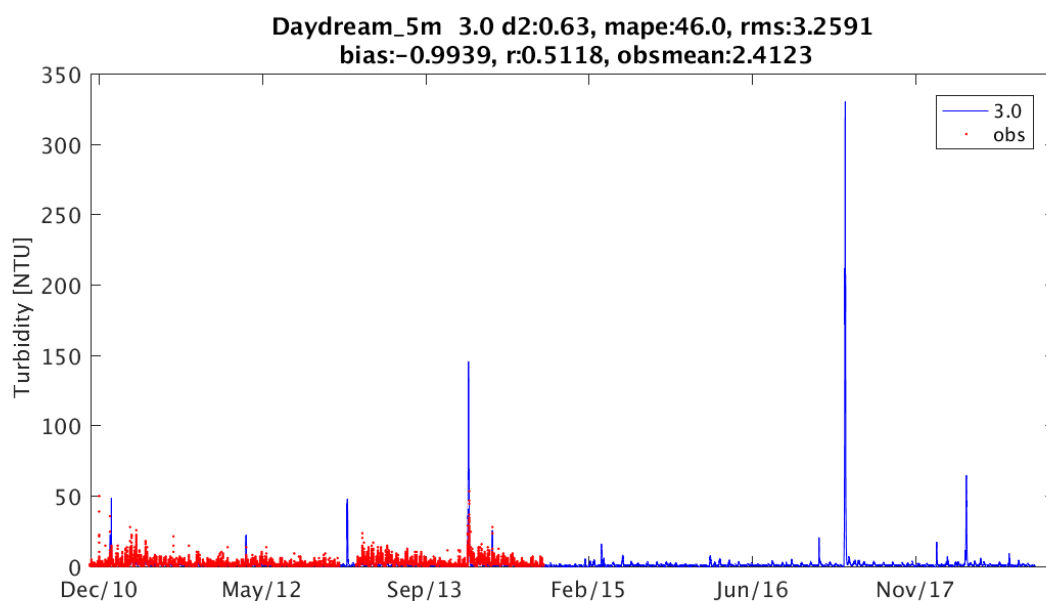

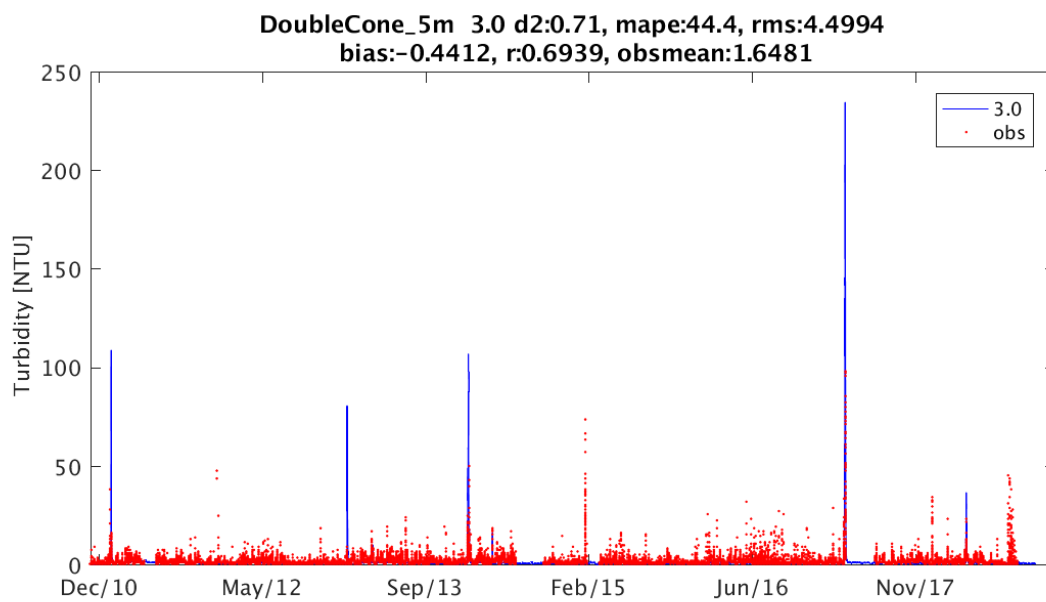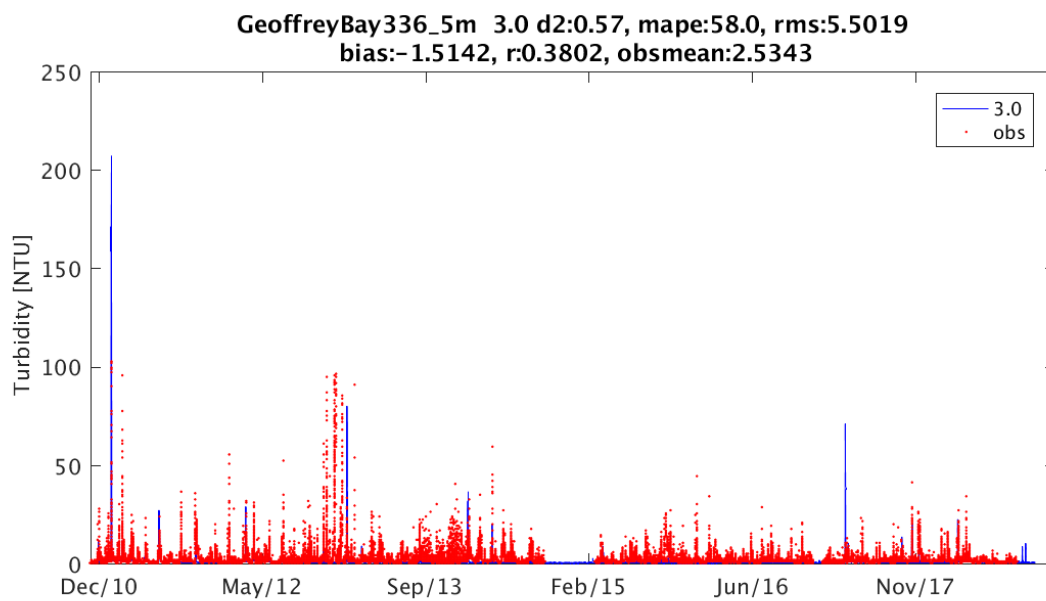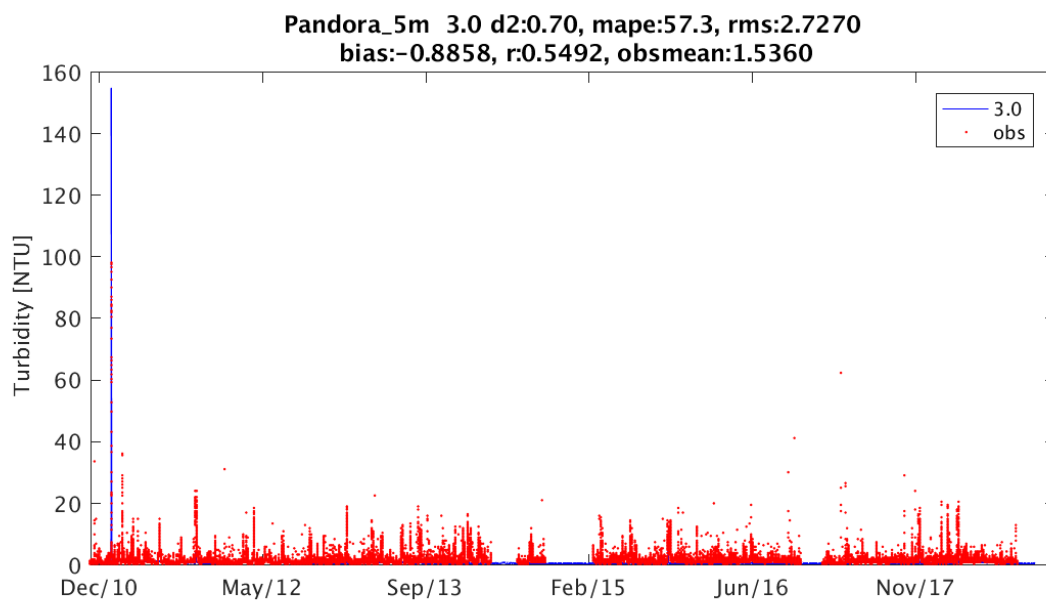

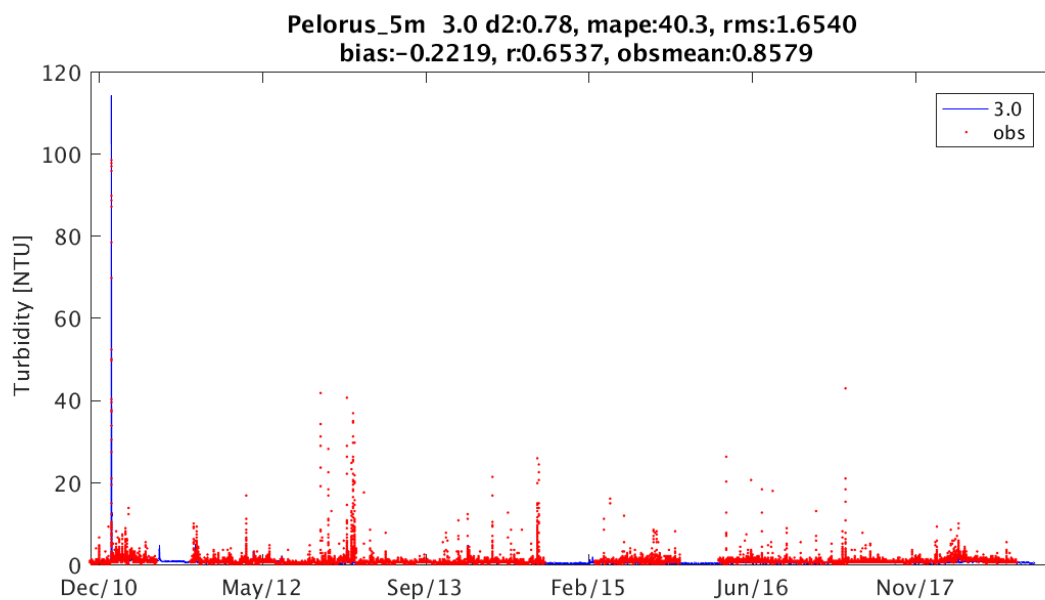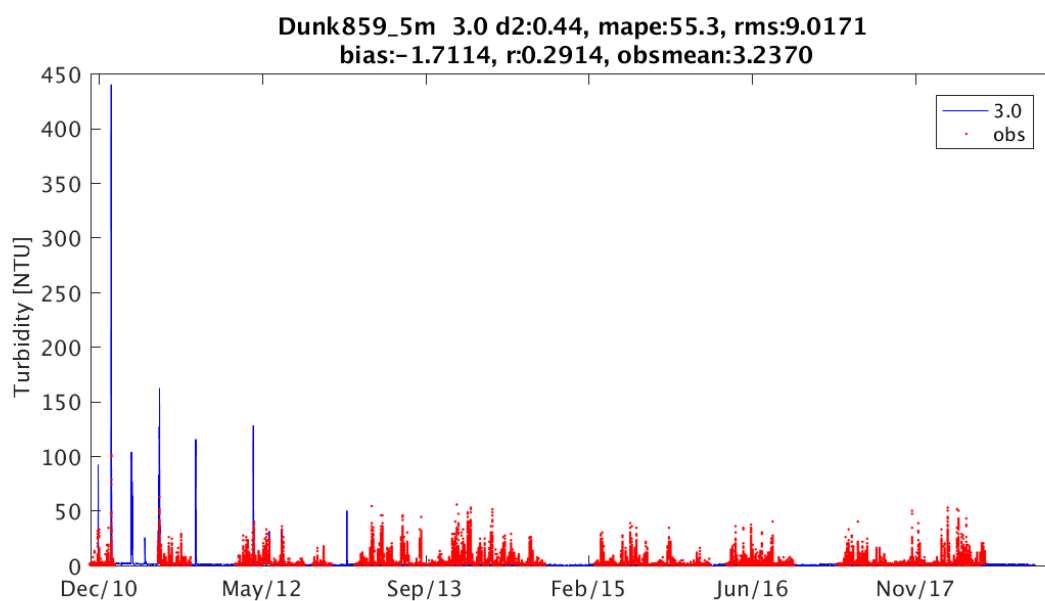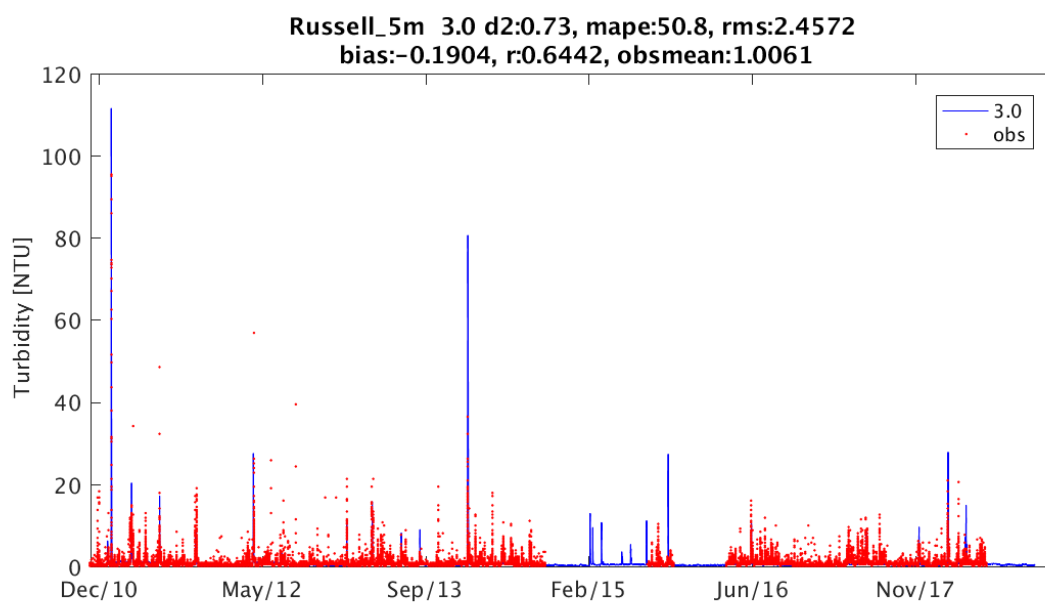

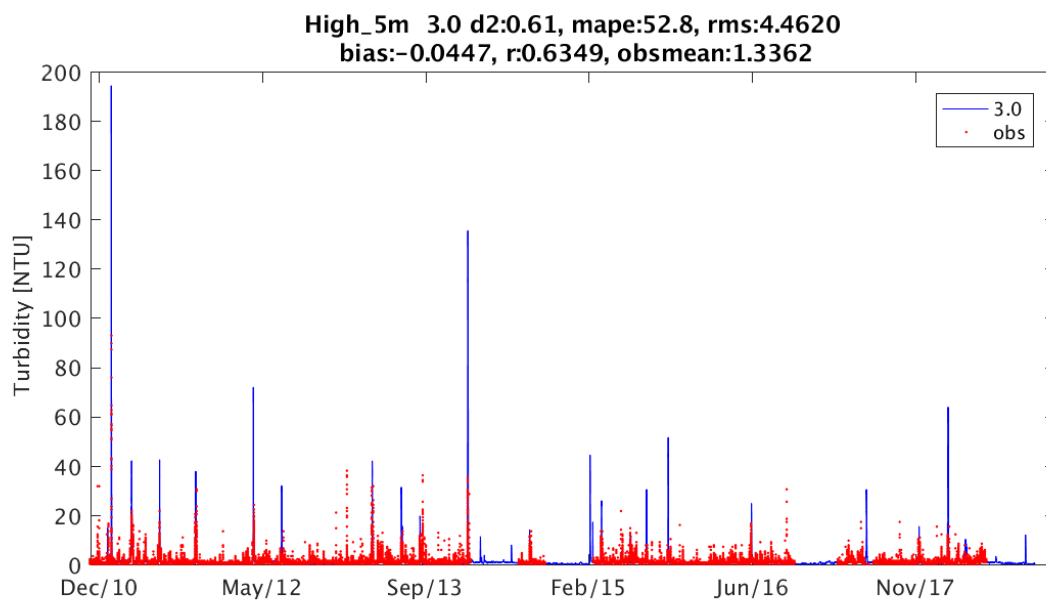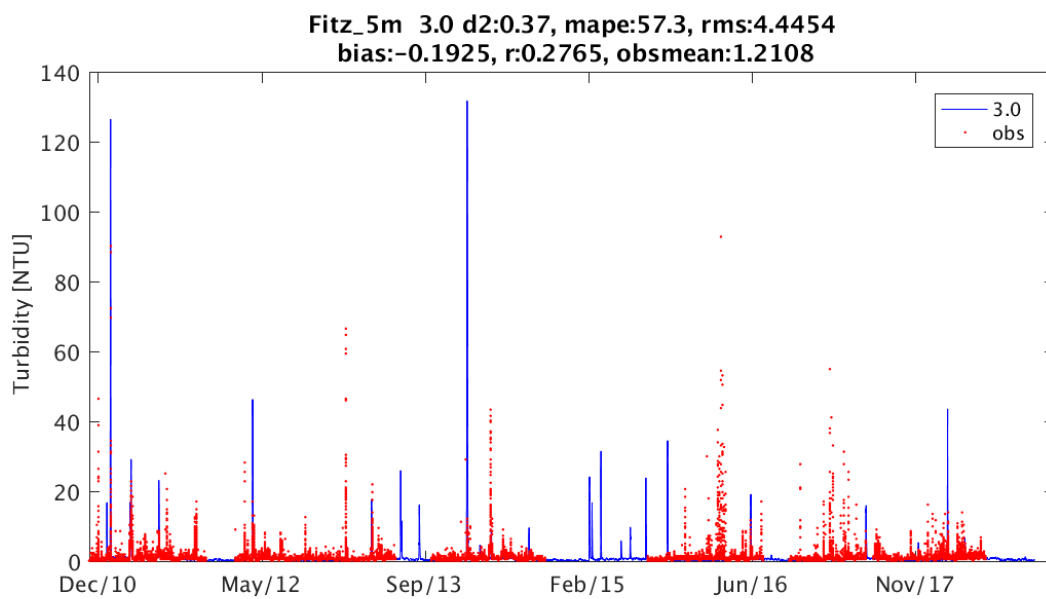



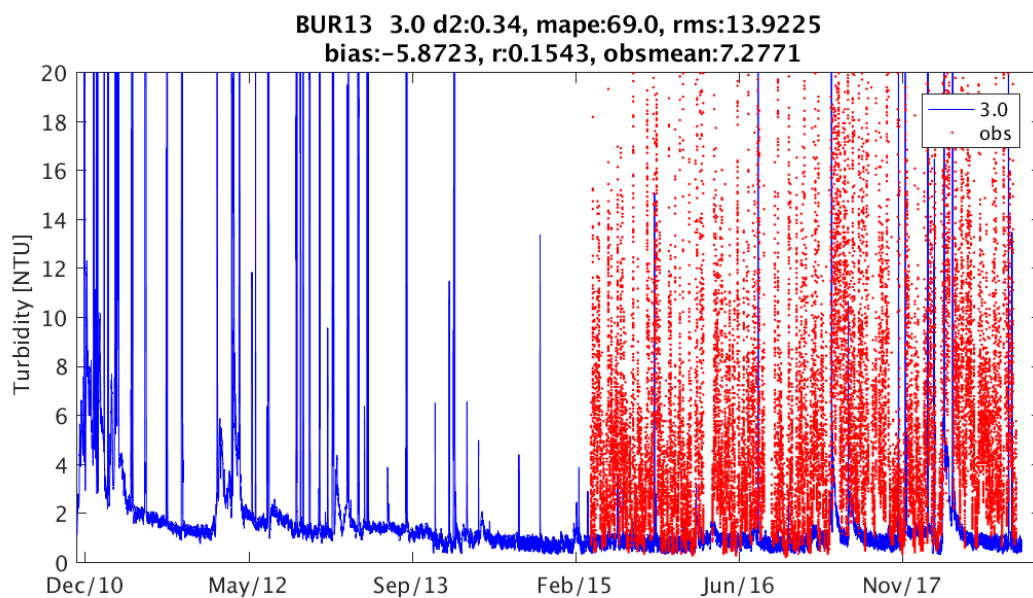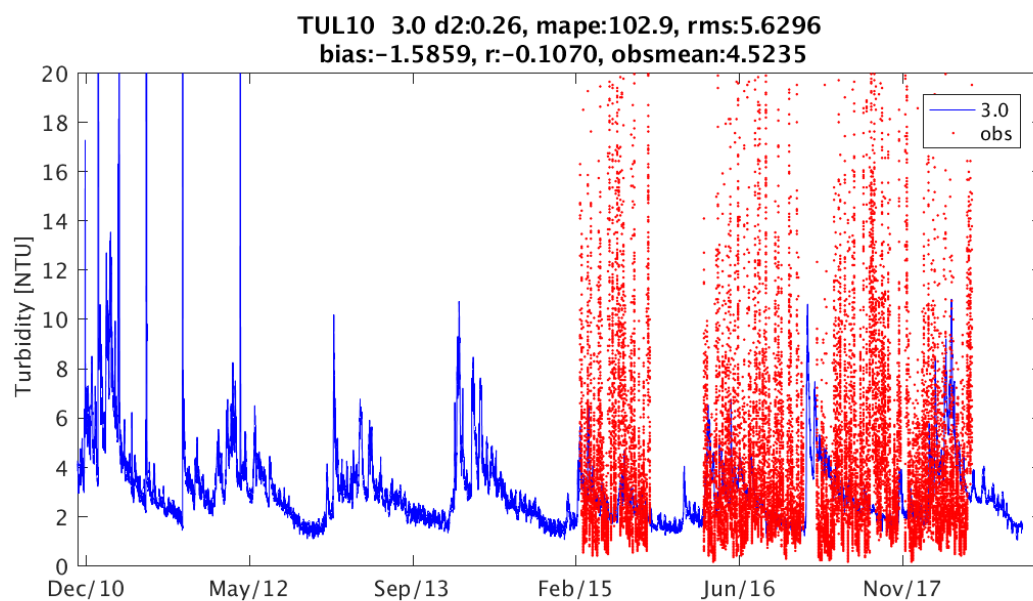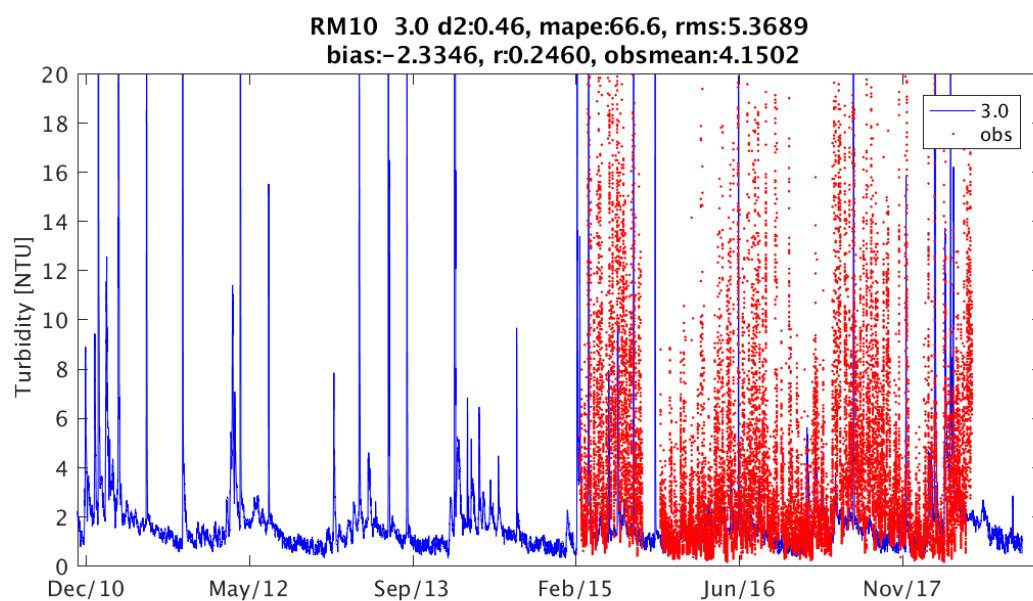

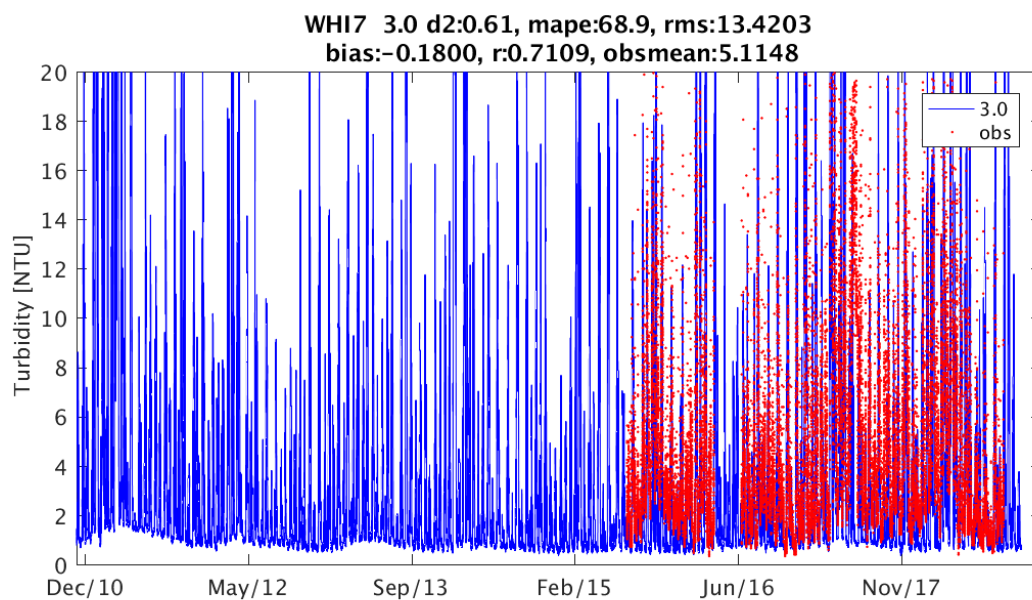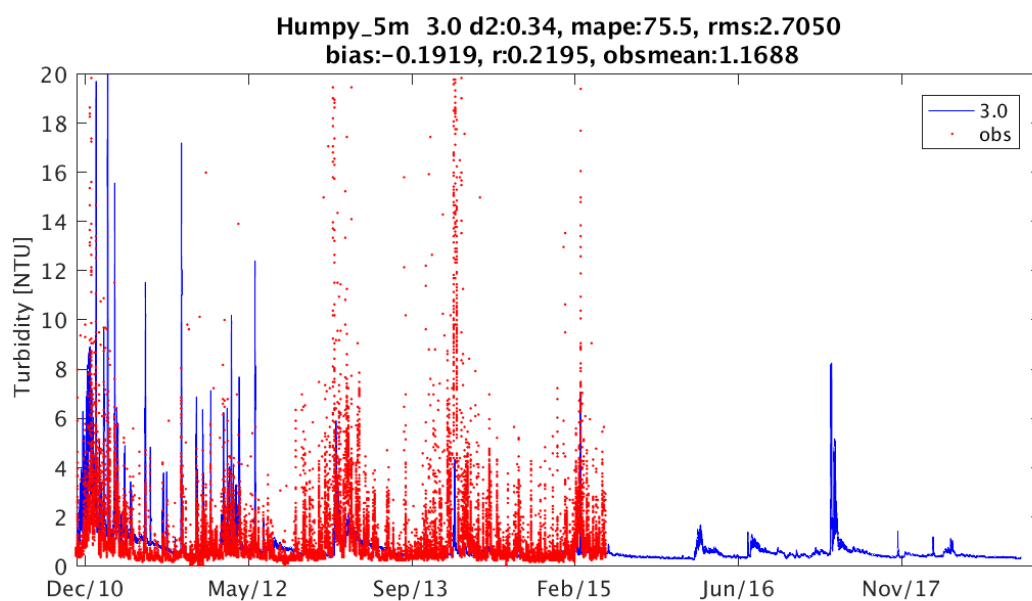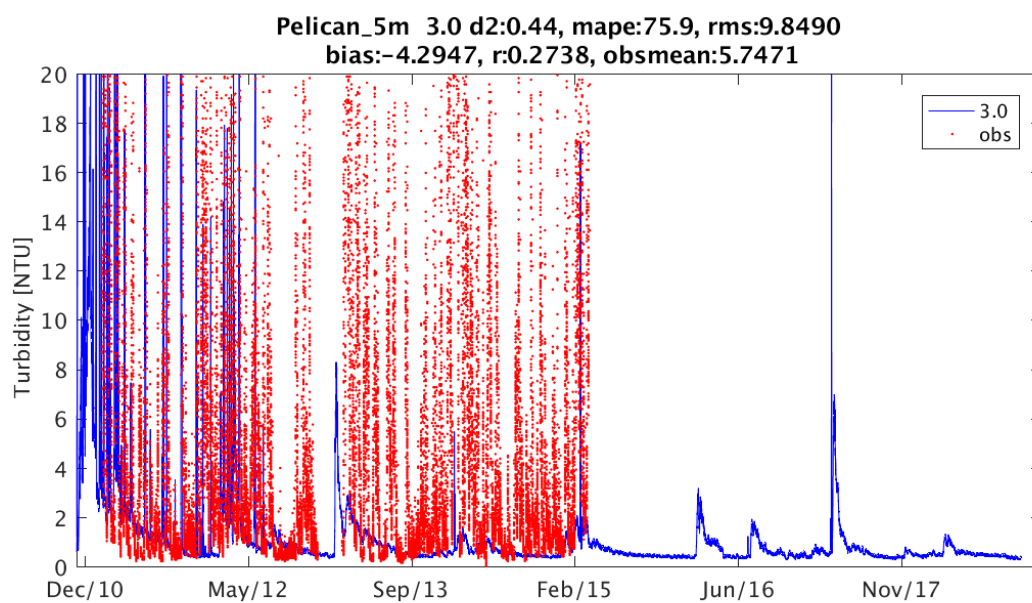

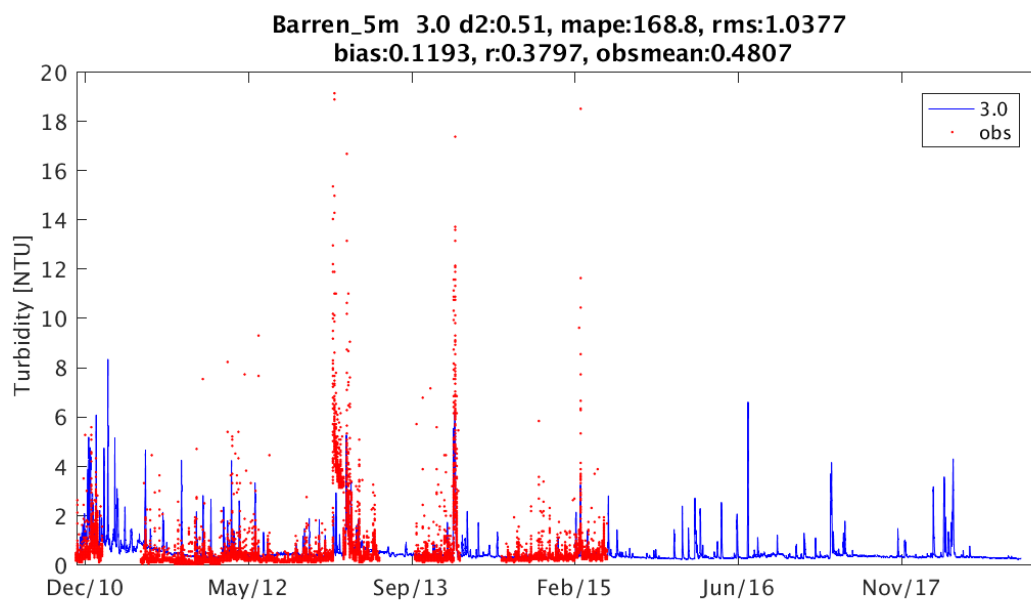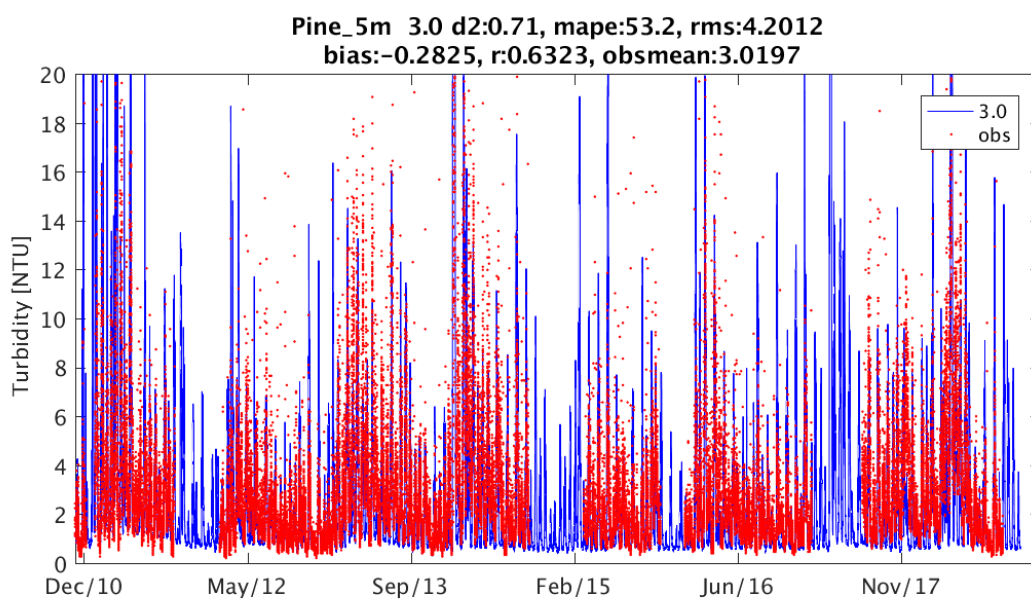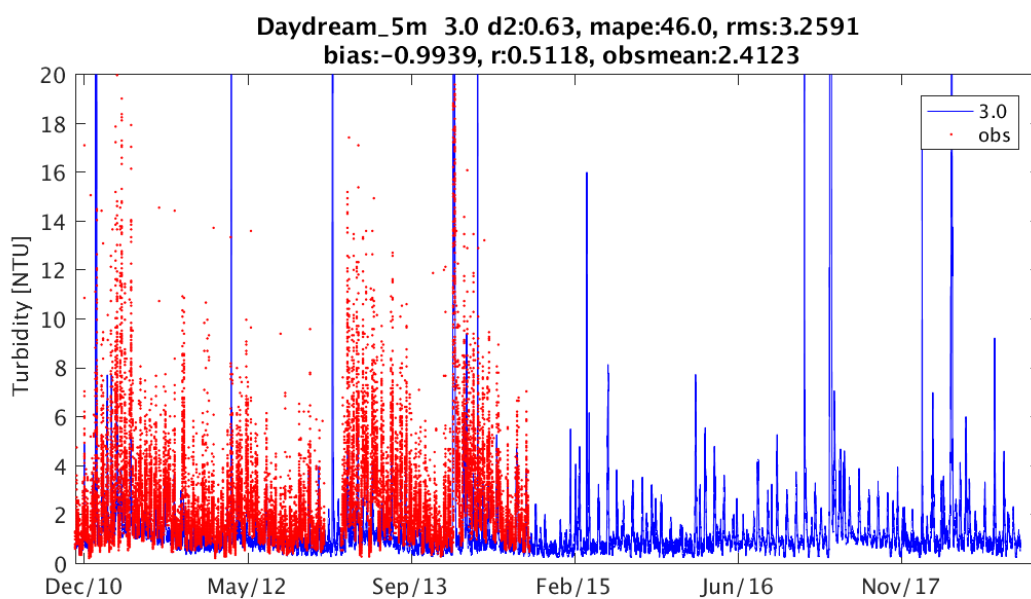

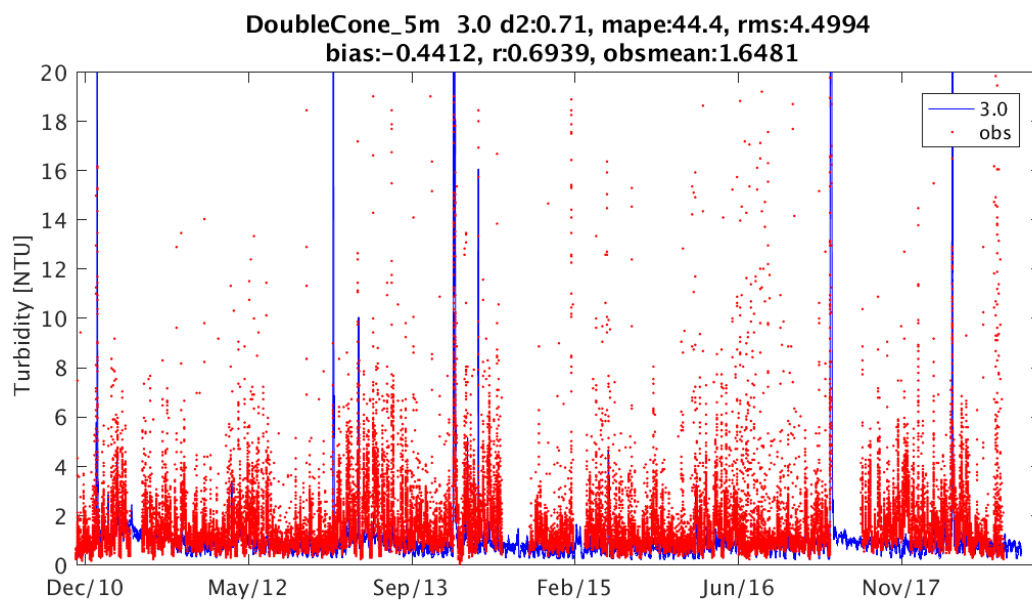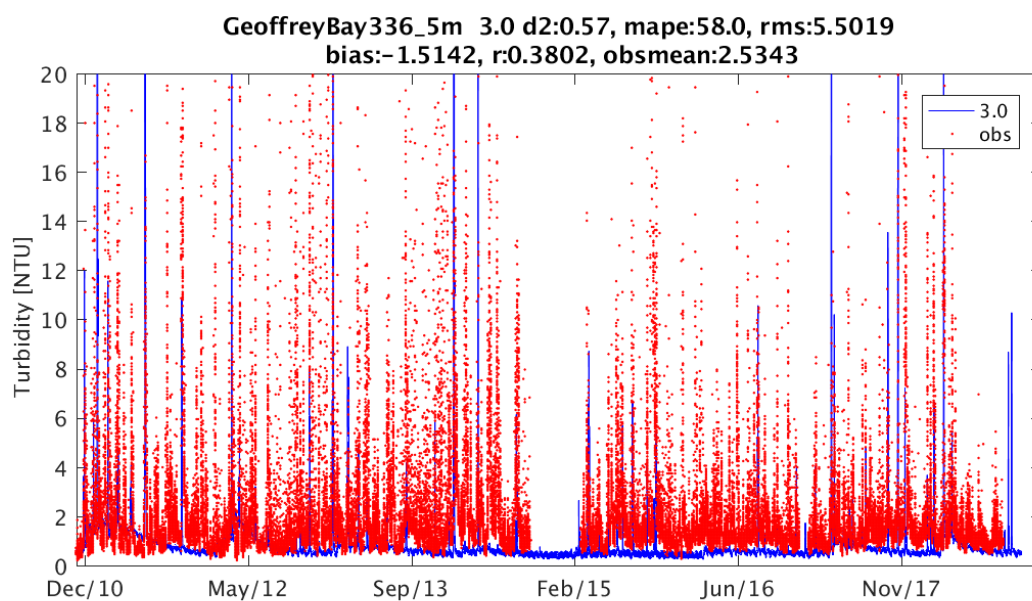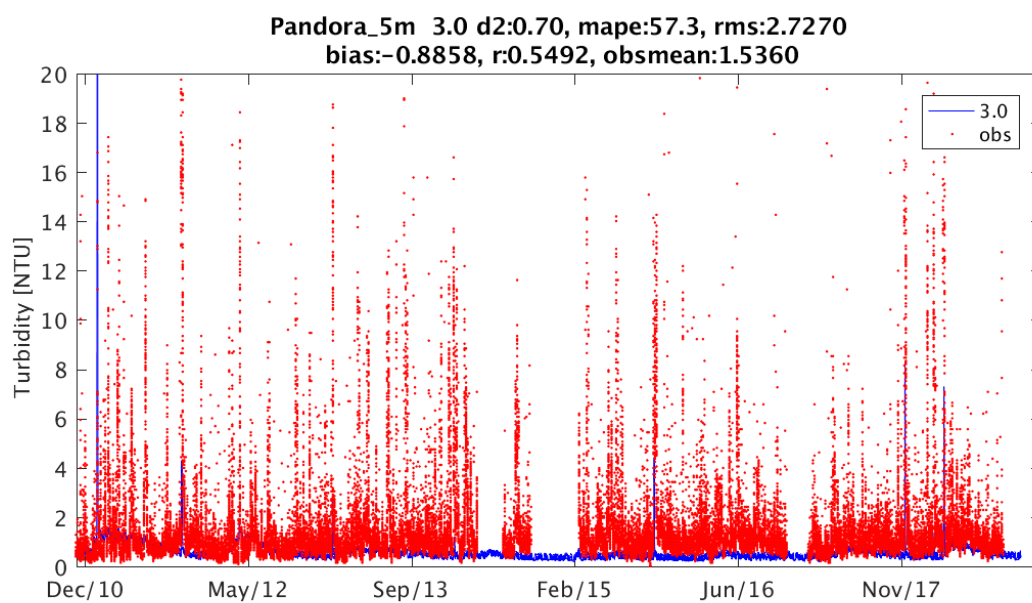



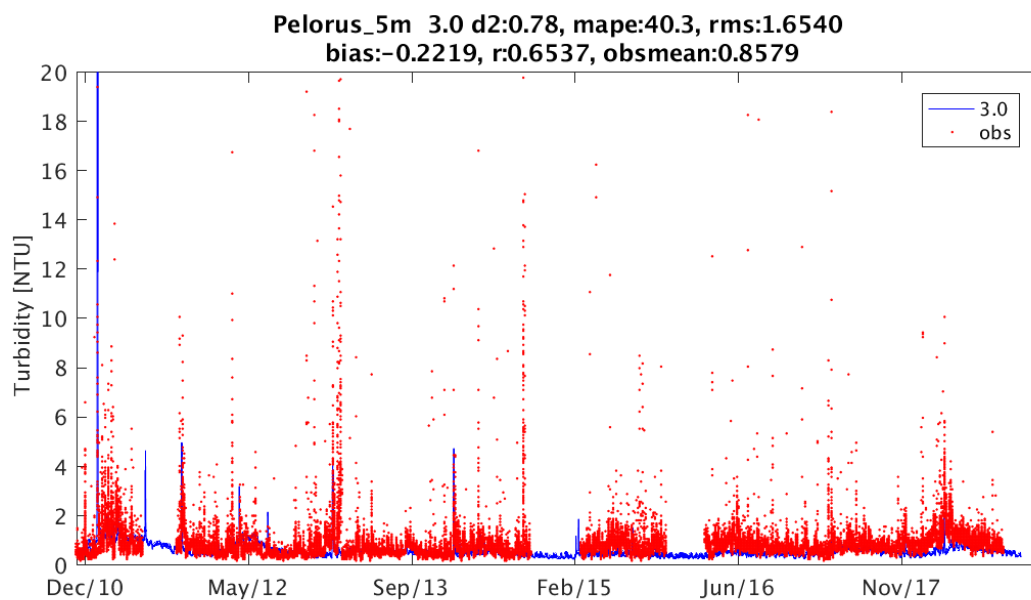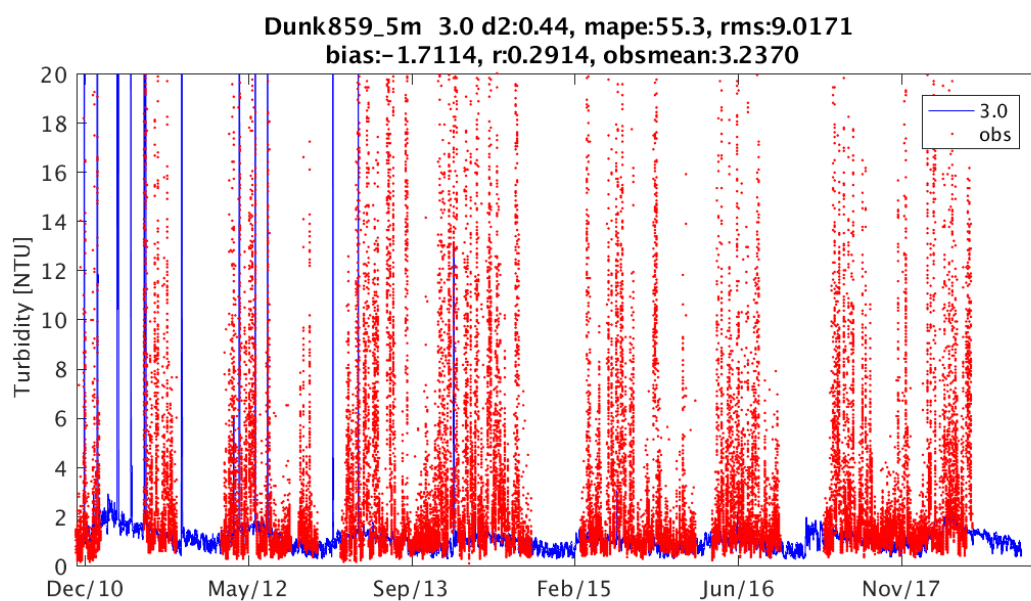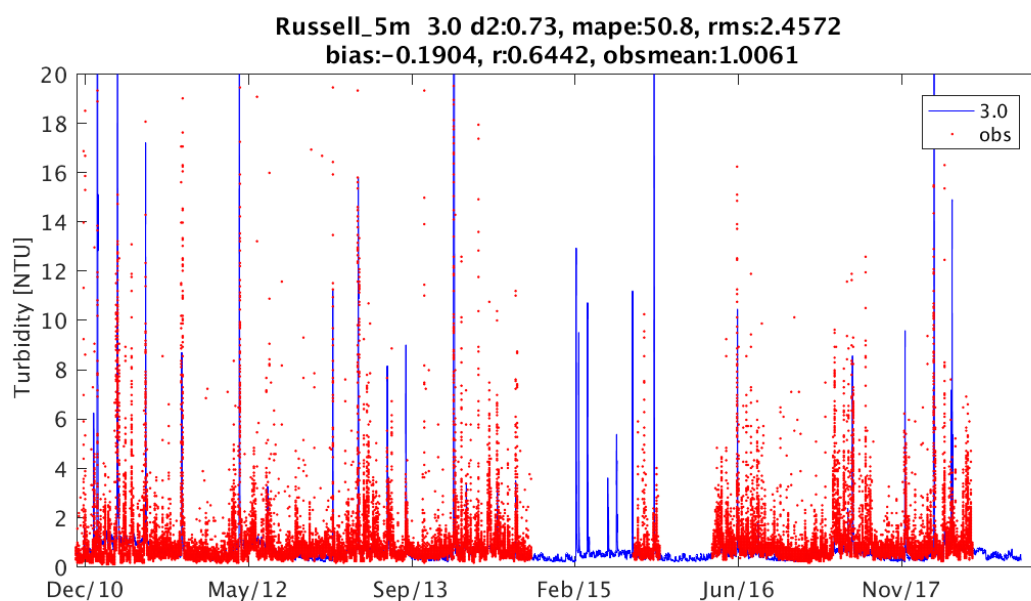

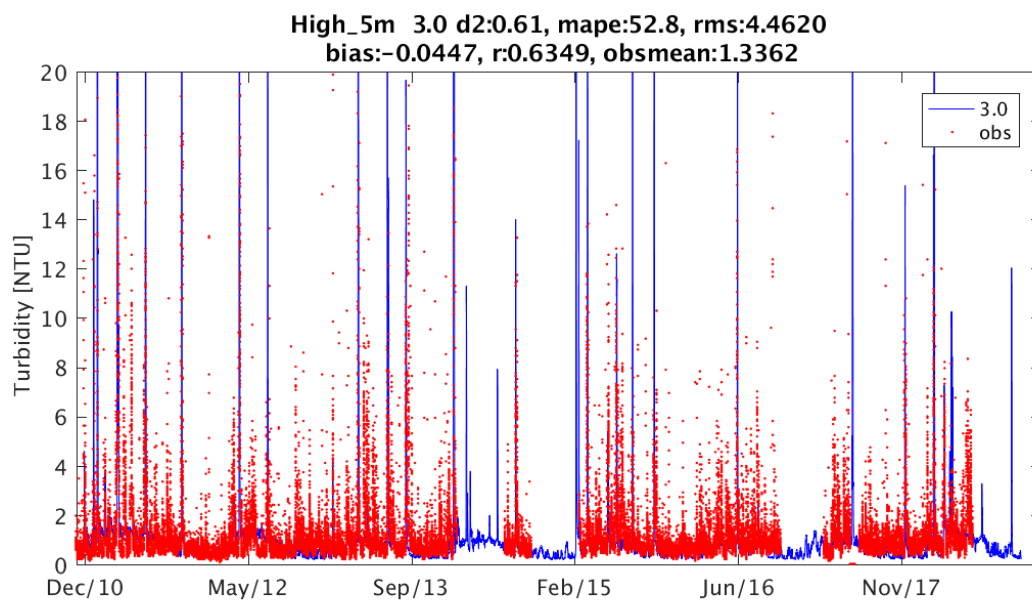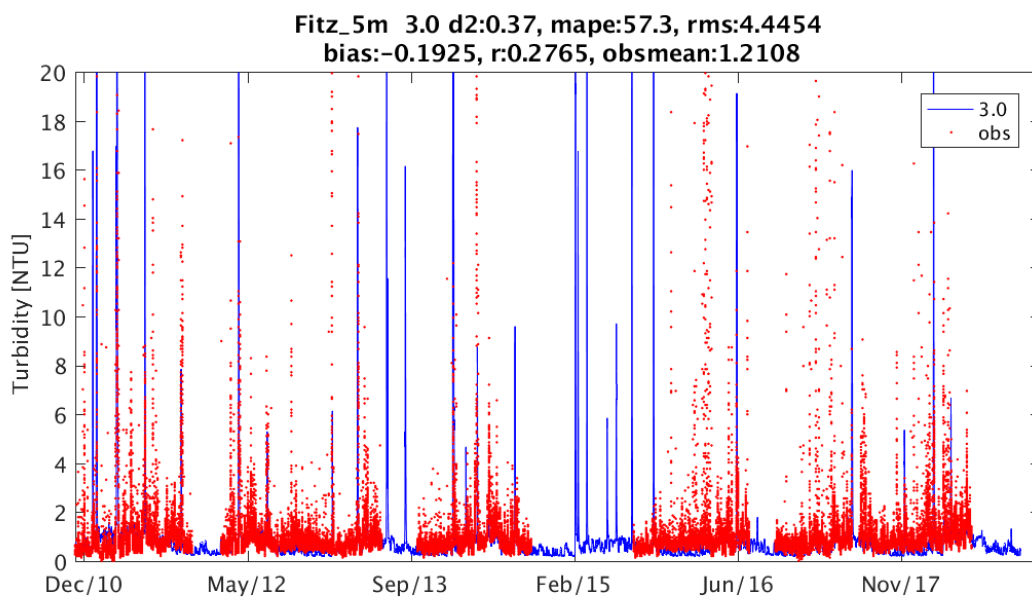

## 21. Simulated Chl *a* assessment against IMOS/NRS fluorescence

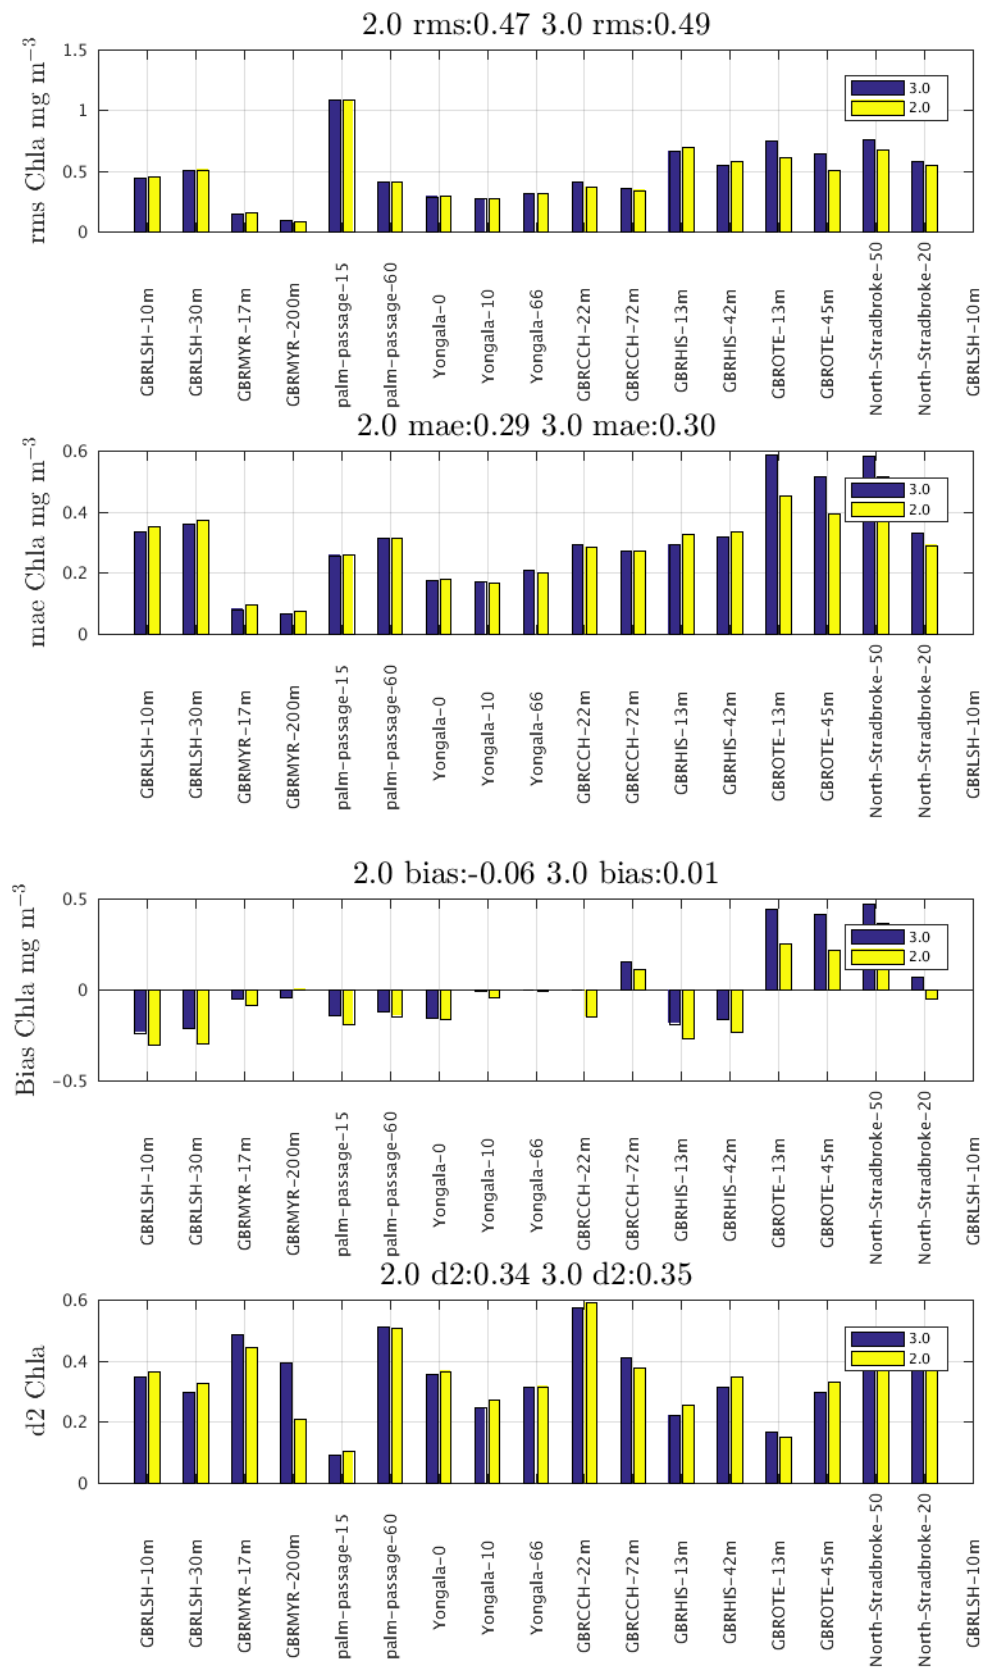

Figure 17 Metrics for IMOS and NRS fluorescence against Chl *a* for model version 3p0 and 2p0 d2 = Willmott index see Statistical metric page 27.mae:mean absolute error, rms root mean square

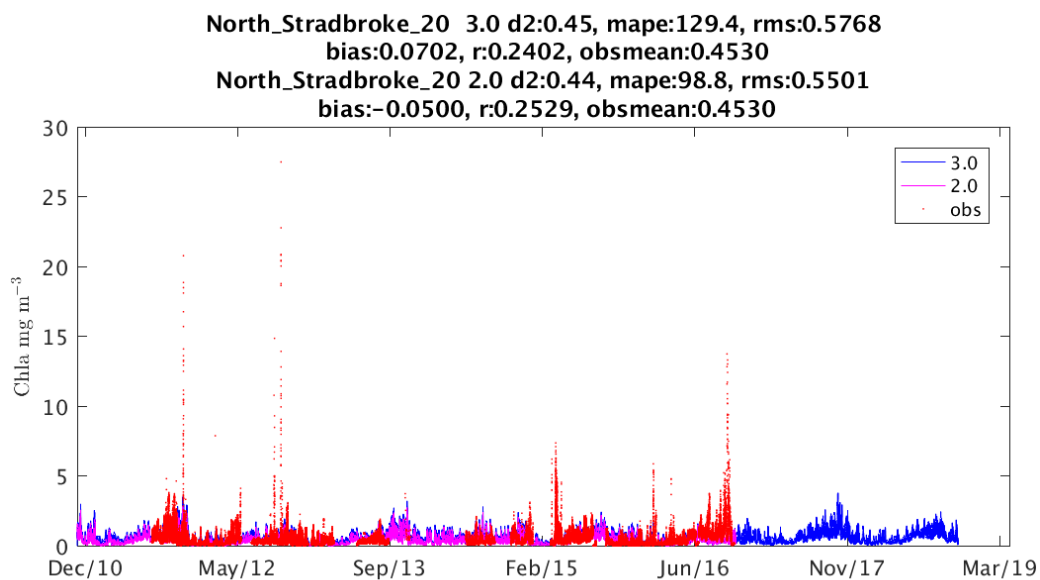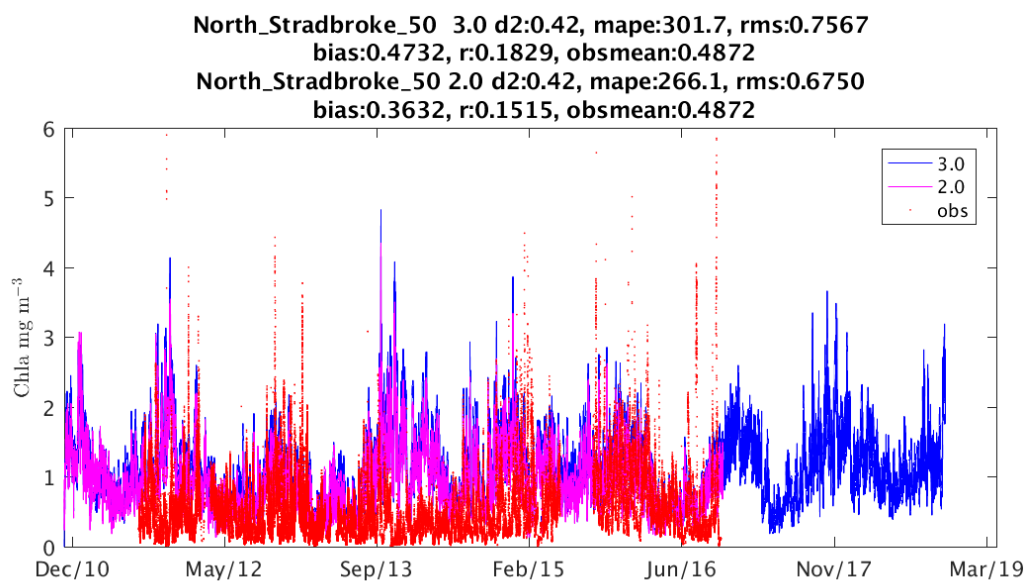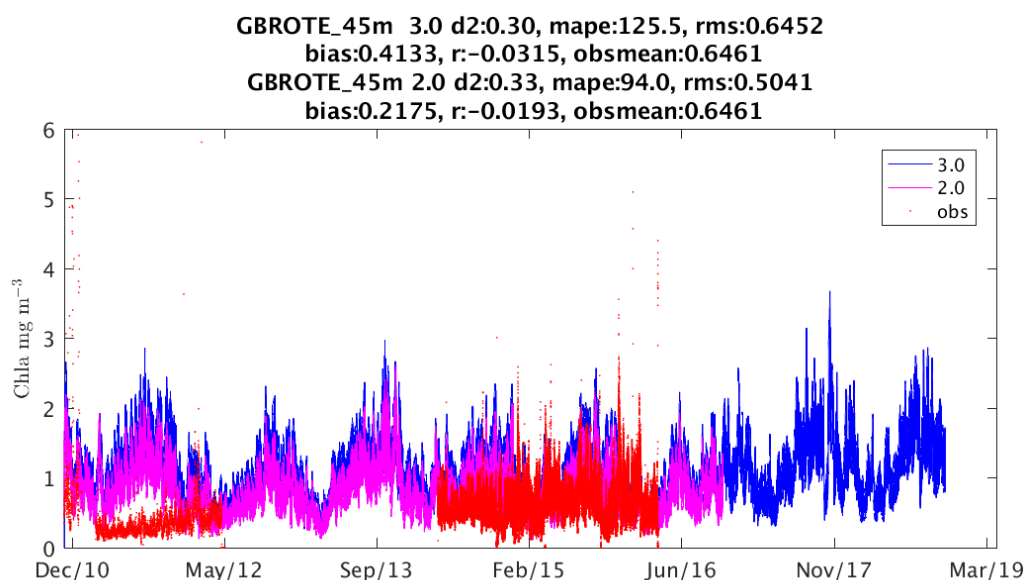



GBROTE\_13m 3.0 d2:0.17, mape:303.9, rms:0.7526  
 bias:0.4410, r:-0.2350, obsmean:0.3825  
 GBROTE\_13m 2.0 d2:0.15, mape:224.1, rms:0.6145  
 bias:0.2524, r:-0.2326, obsmean:0.3825

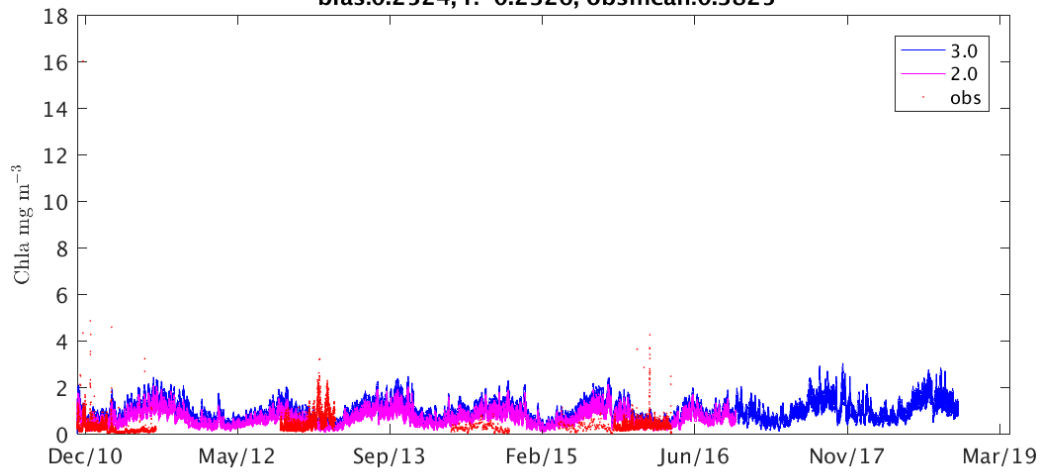

GBRHIS\_42m 3.0 d2:0.32, mape:59.9, rms:0.5507  
 bias:-0.1605, r:0.0432, obsmean:0.6129  
 GBRHIS\_42m 2.0 d2:0.35, mape:54.9, rms:0.5798  
 bias:-0.2353, r:0.0076, obsmean:0.6129

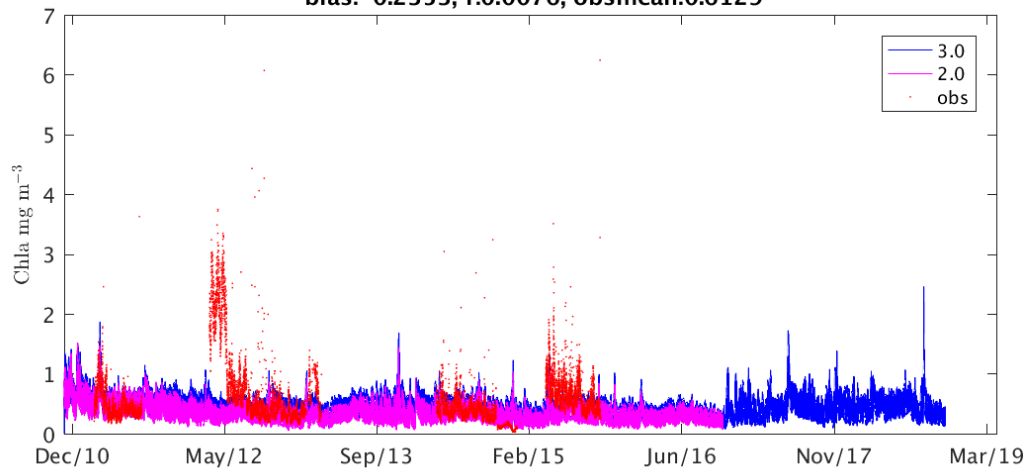

GBRHIS\_13m 3.0 d2:0.22, mape:47.9, rms:0.6678  
 bias:-0.1870, r:0.0568, obsmean:0.5930  
 GBRHIS\_13m 2.0 d2:0.26, mape:48.4, rms:0.6954  
 bias:-0.2695, r:0.0376, obsmean:0.5930

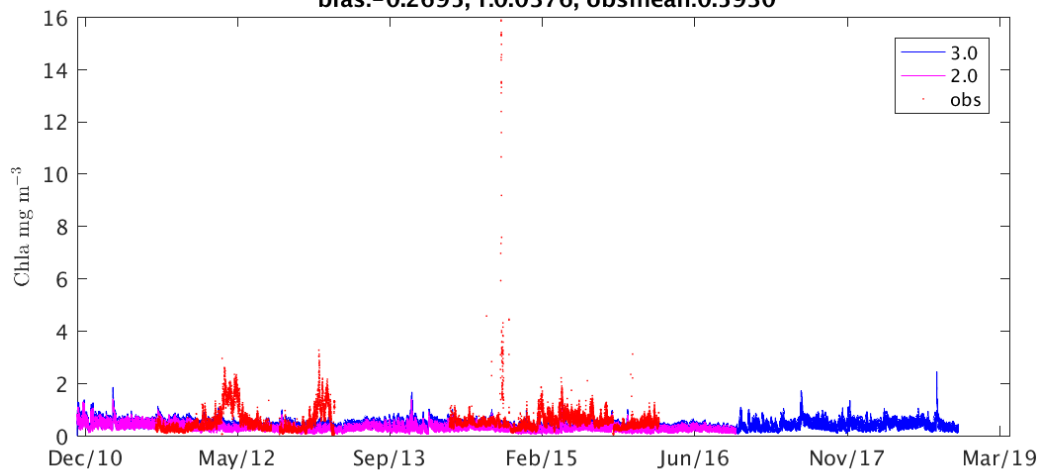

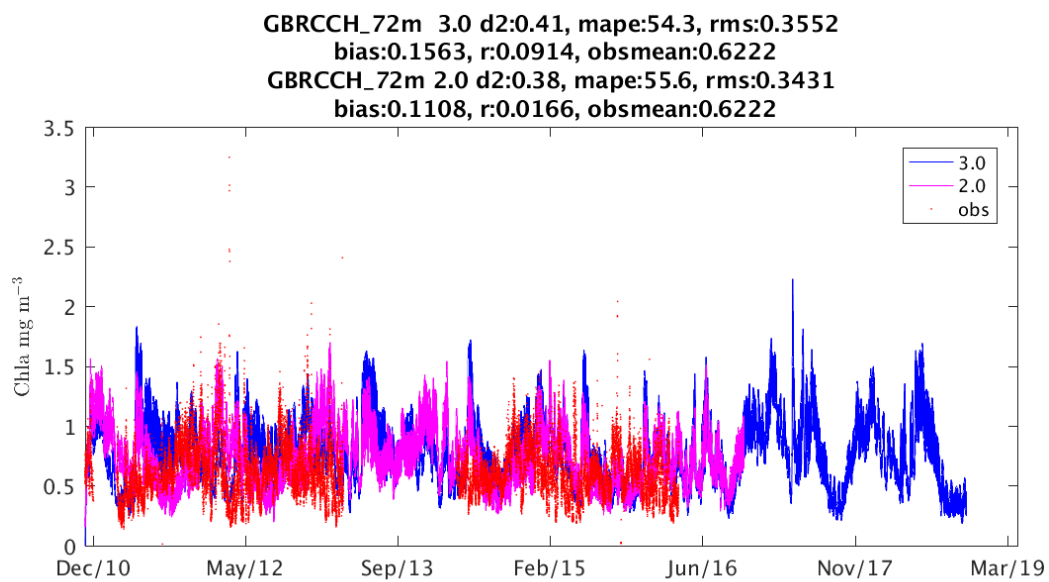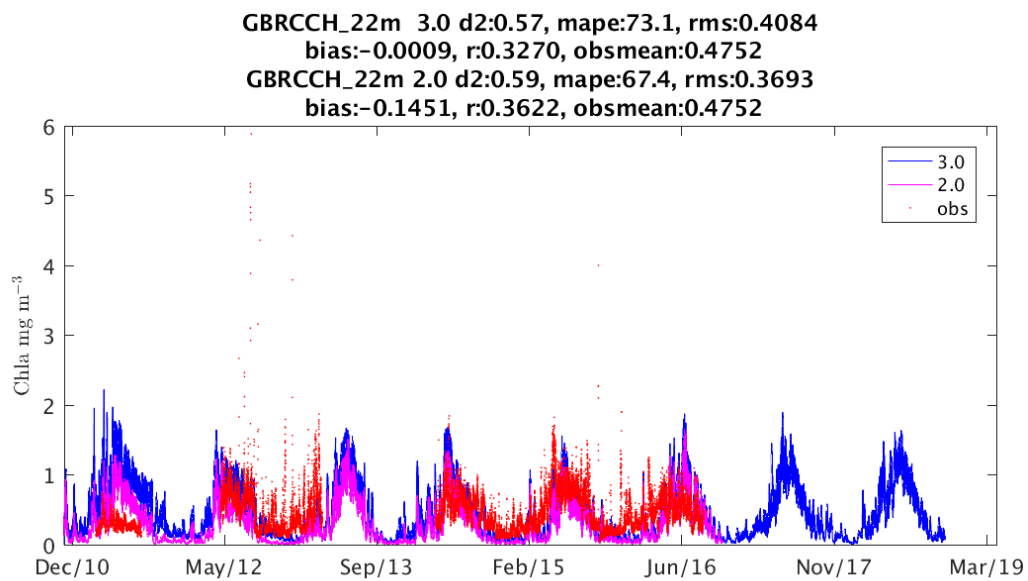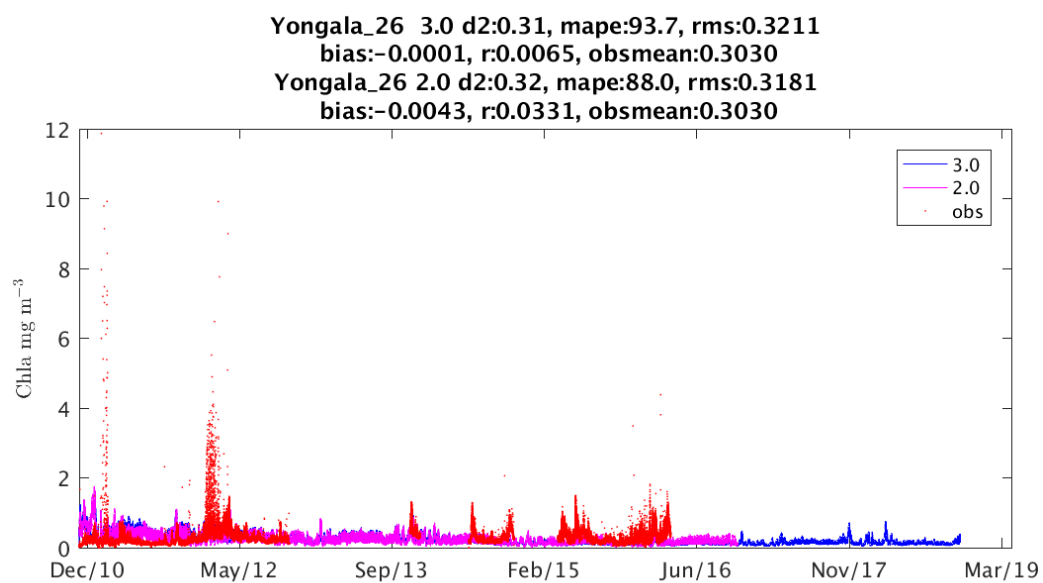

Yongala\_10 3.0 d2:0.25, mape:84.2, rms:0.2741  
 bias:-0.0103, r:0.0050, obsmean:0.2382  
 Yongala\_10 2.0 d2:0.27, mape:79.2, rms:0.2704  
 bias:-0.0433, r:0.0183, obsmean:0.2382

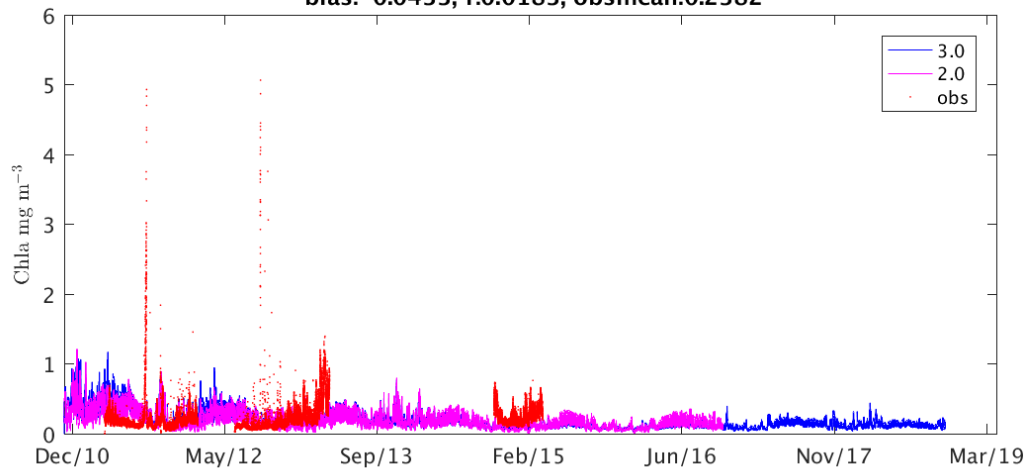

Yongala\_0 3.0 d2:0.35, mape:51.2, rms:0.2904  
 bias:-0.1563, r:0.1742, obsmean:0.3087  
 Yongala\_0 2.0 d2:0.37, mape:52.2, rms:0.2970  
 bias:-0.1613, r:0.1419, obsmean:0.3087

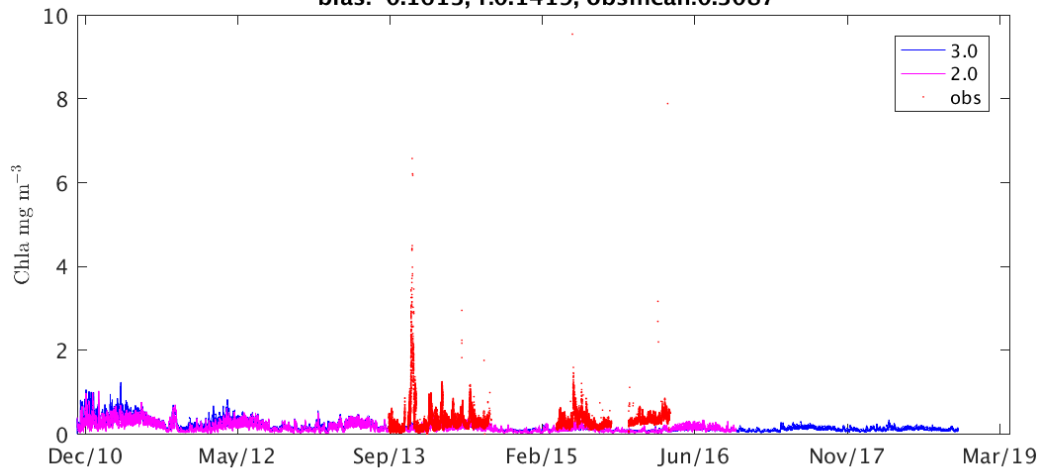

palm\_passage\_60 3.0 d2:0.51, mape:60.7, rms:0.4143  
 bias:-0.1187, r:0.2124, obsmean:0.7007  
 palm\_passage\_60 2.0 d2:0.51, mape:58.3, rms:0.4087  
 bias:-0.1447, r:0.2145, obsmean:0.7007

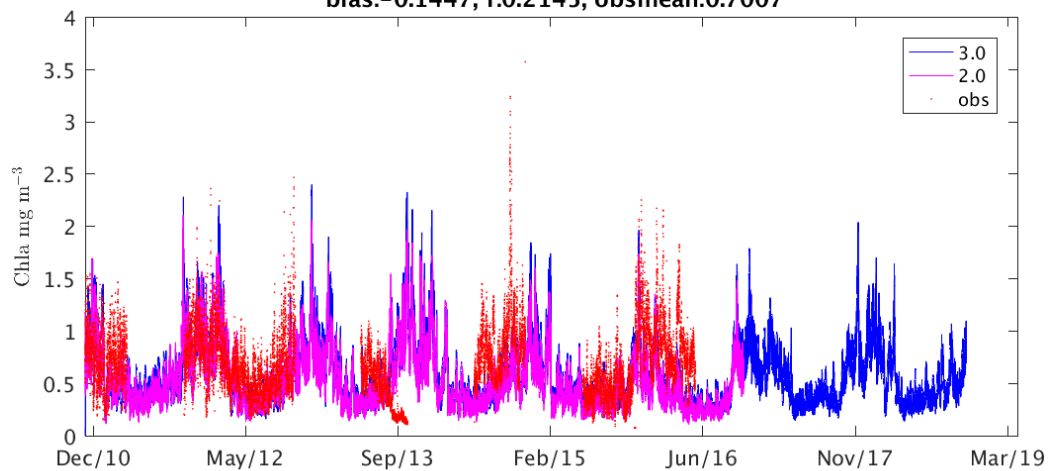

**palm\_passage\_15 3.0 d2:0.09, mape:66.8, rms:1.0897**  
**bias:-0.1422, r:0.0324, obsmean:0.3832**  
**palm\_passage\_15 2.0 d2:0.11, mape:59.8, rms:1.0911**  
**bias:-0.1936, r:0.0751, obsmean:0.3832**

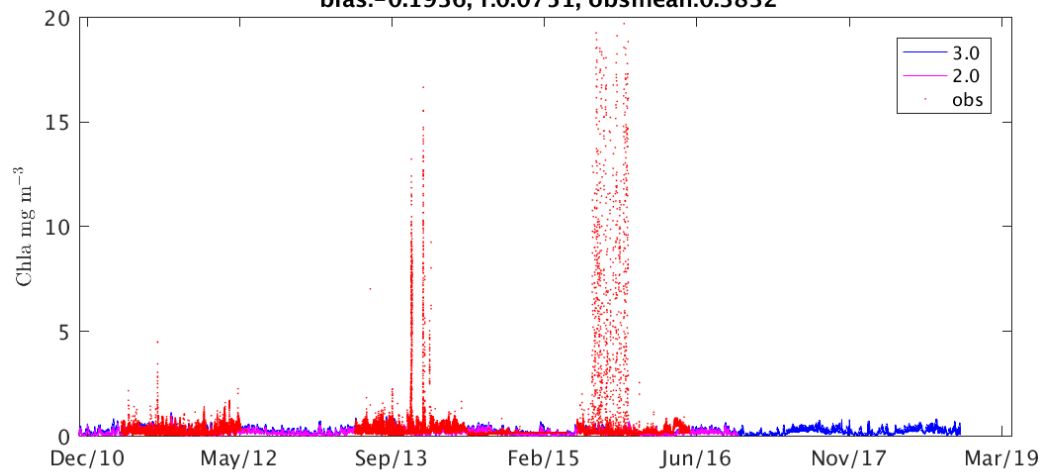

**GBRMYR\_200m 3.0 d2:0.40, mape:59.4, rms:0.0931**  
**bias:-0.0440, r:-0.1409, obsmean:0.1123**  
**GBRMYR\_200m 2.0 d2:0.21, mape:102.3, rms:0.0888**  
**bias:0.0034, r:-0.2418, obsmean:0.1123**

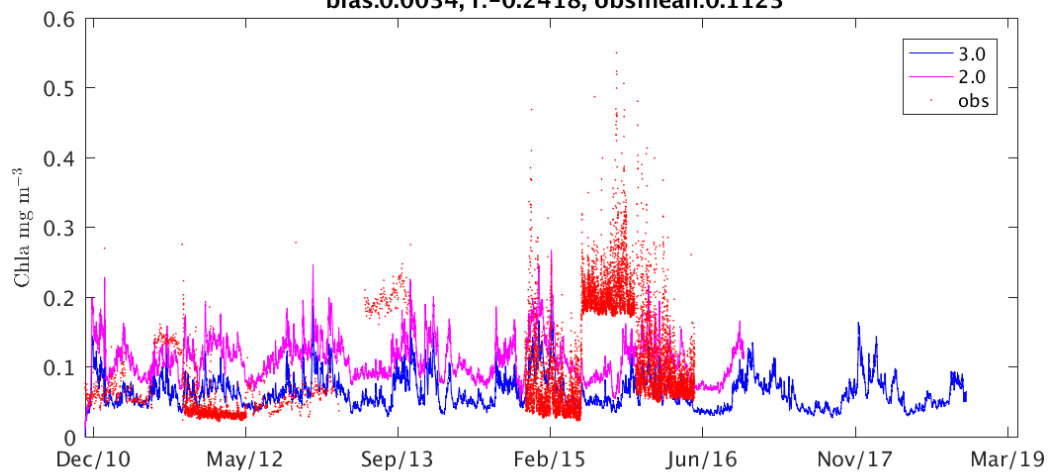

GBRMYR\_17m 3.0 d2:0.49, mape:47.3, rms:0.1464  
 bias:-0.0480, r:0.2613, obsmean:0.1679  
 GBRMYR\_17m 2.0 d2:0.45, mape:58.0, rms:0.1573  
 bias:-0.0877, r:0.2652, obsmean:0.1679

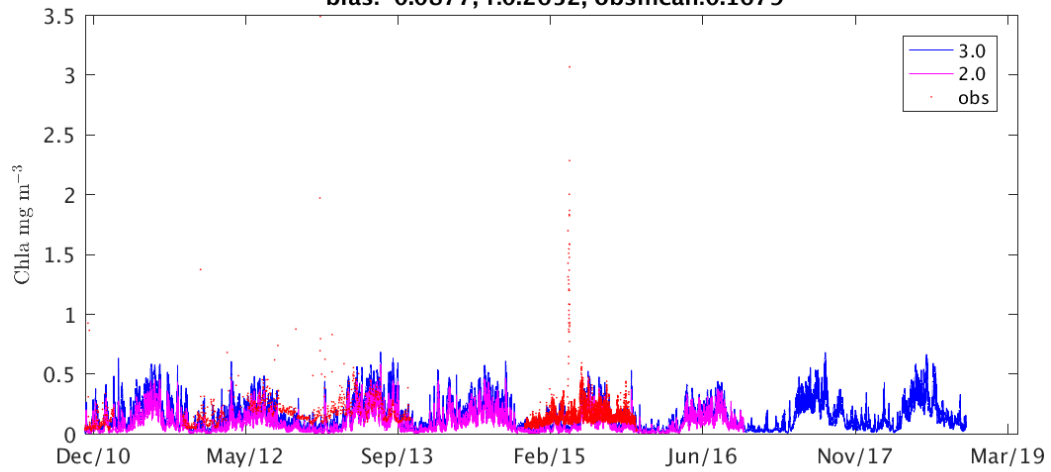

GBRLSH\_30m 3.0 d2:0.30, mape:66.0, rms:0.5020  
 bias:-0.2140, r:-0.1121, obsmean:0.5537  
 GBRLSH\_30m 2.0 d2:0.33, mape:64.9, rms:0.5123  
 bias:-0.2955, r:-0.0946, obsmean:0.5537

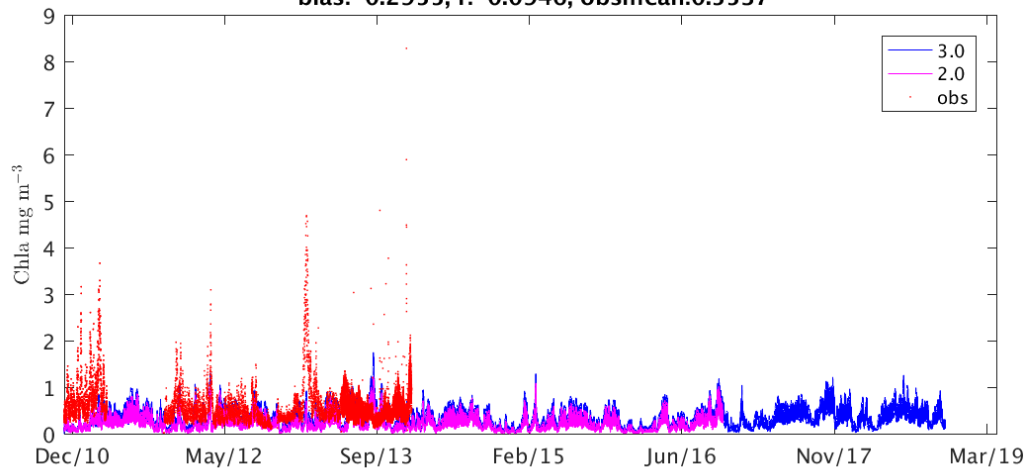

## 22. Simulated NOx assessment against NRS: Yongala and NSI

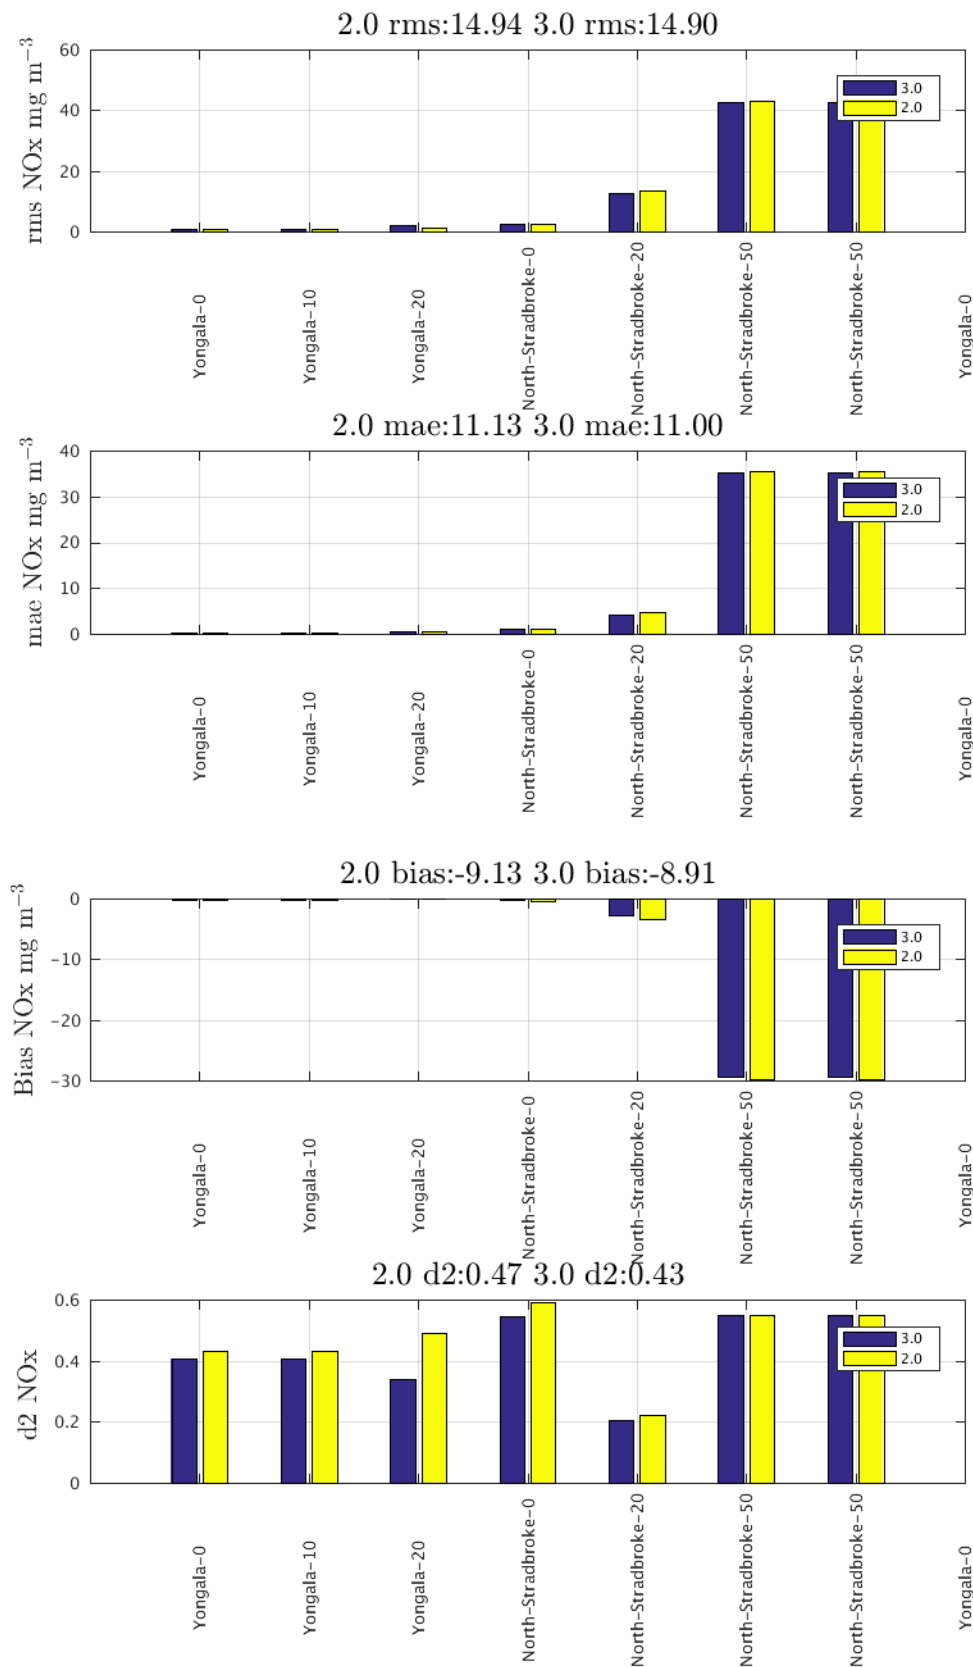

Figure 18 Metrics for NRS NOx against model version 3p0 and 2p0 until 2014 for model version 3p0 and 2p0 d2 = Willmott index see Statistical metric page 27.mae:mean absolute error, rms root mean square

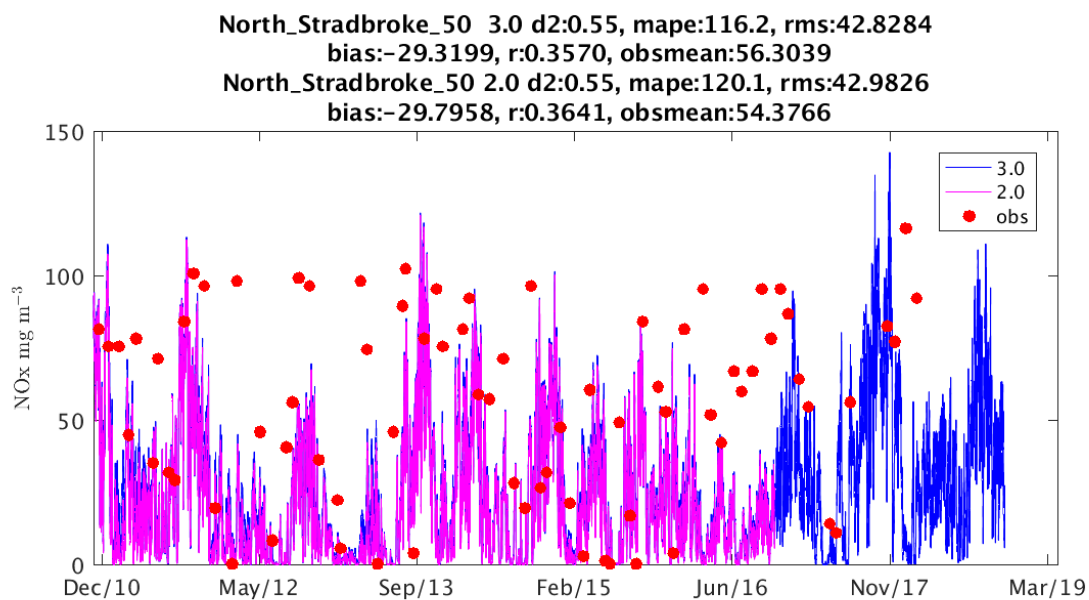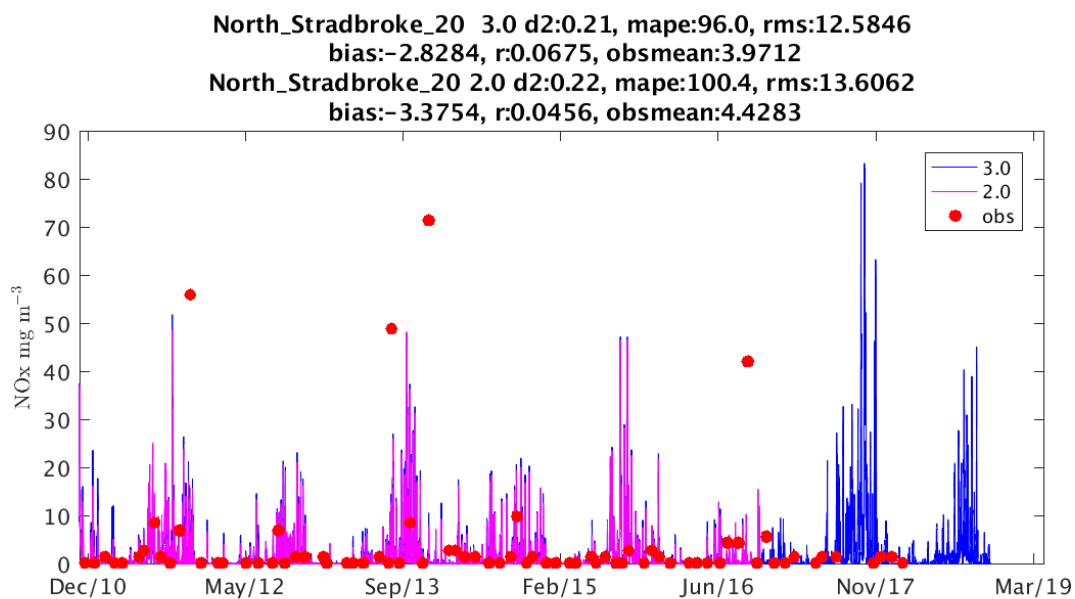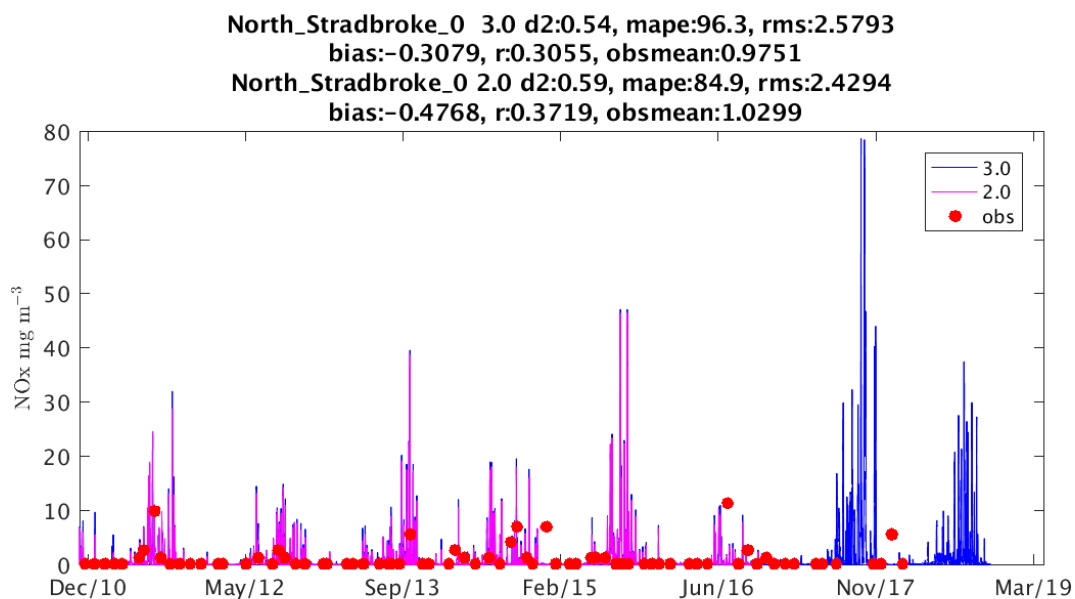

Yongala\_20 3.0 d2:0.34, mape:148.2, rms:1.9444

bias:-0.0721, r:0.2131, obsmean:0.3716

Yongala\_20 2.0 d2:0.49, mape:92.6, rms:1.2867

bias:-0.0324, r:0.3196, obsmean:0.4543

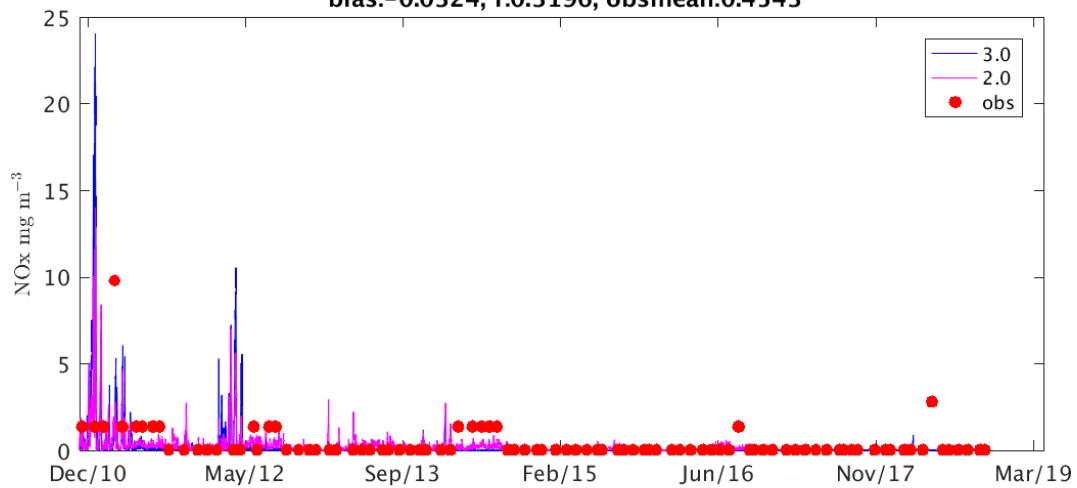

Yongala\_10 3.0 d2:0.41, mape:90.3, rms:0.7520

bias:-0.2569, r:0.2792, obsmean:0.3144

Yongala\_10 2.0 d2:0.43, mape:80.9, rms:0.6571

bias:-0.2030, r:0.4787, obsmean:0.3407

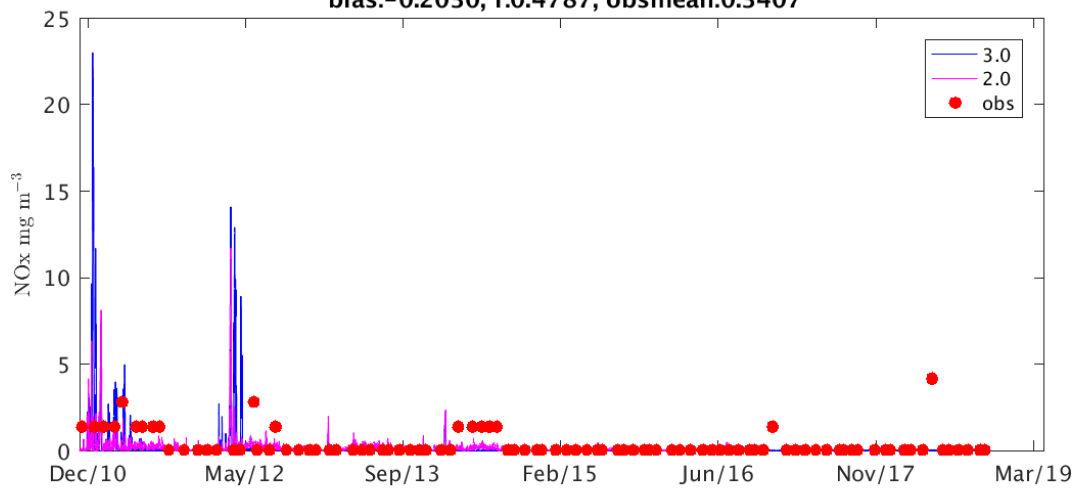



## 23. Simulated NH4 assessment against NRS: Yongala and NSI

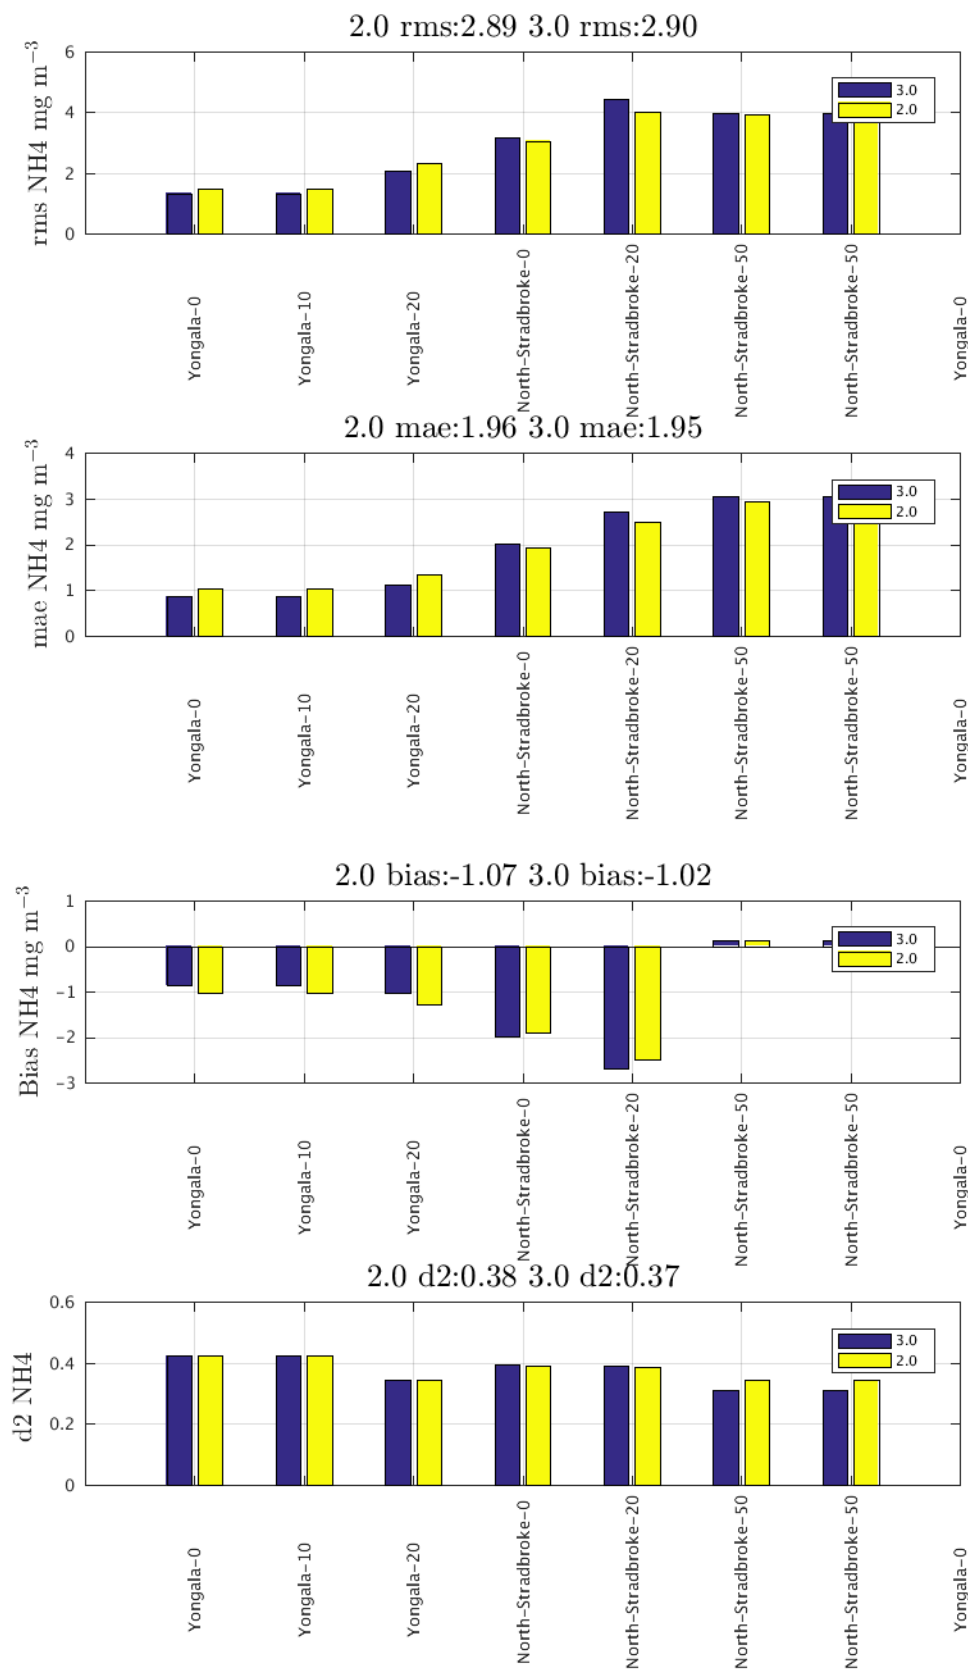

Figure 19 Metrics for NRS NH4 for model version 3p0 and 2p0 d2 = Willmott index see Statistical metric page 27.mae:mean absolute error, rms root mean square

North\_Stradbroke\_50 3.0 d2:0.31, mape:168.9, rms:3.9650  
 bias:0.1315, r:-0.0367, obsmean:3.0019  
 North\_Stradbroke\_50 2.0 d2:0.34, mape:164.3, rms:3.9159  
 bias:0.1140, r:0.0275, obsmean:2.8723

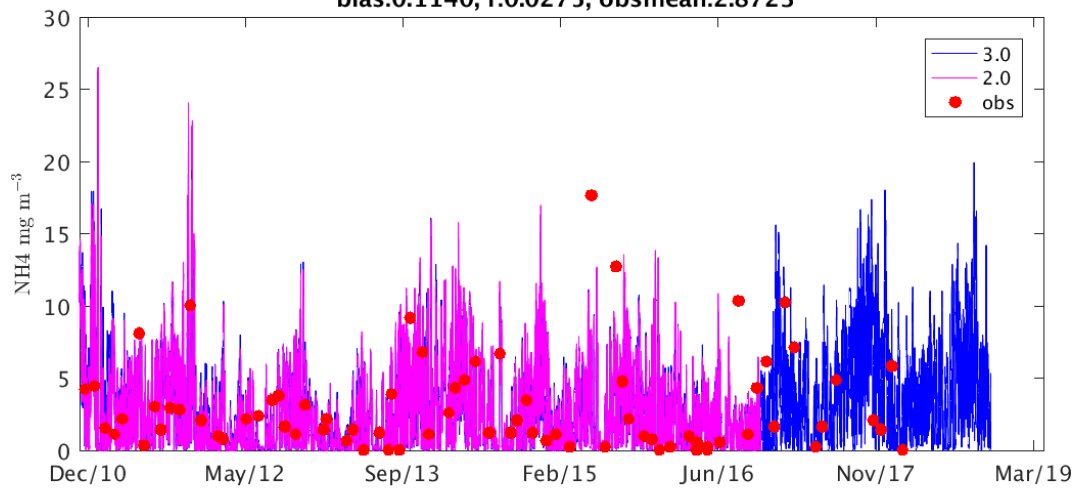

North\_Stradbroke\_20 3.0 d2:0.39, mape:94.1, rms:4.4470  
 bias:-2.7033, r:-0.0254, obsmean:2.7669  
 North\_Stradbroke\_20 2.0 d2:0.38, mape:93.5, rms:3.9994  
 bias:-2.4815, r:-0.0191, obsmean:2.5500

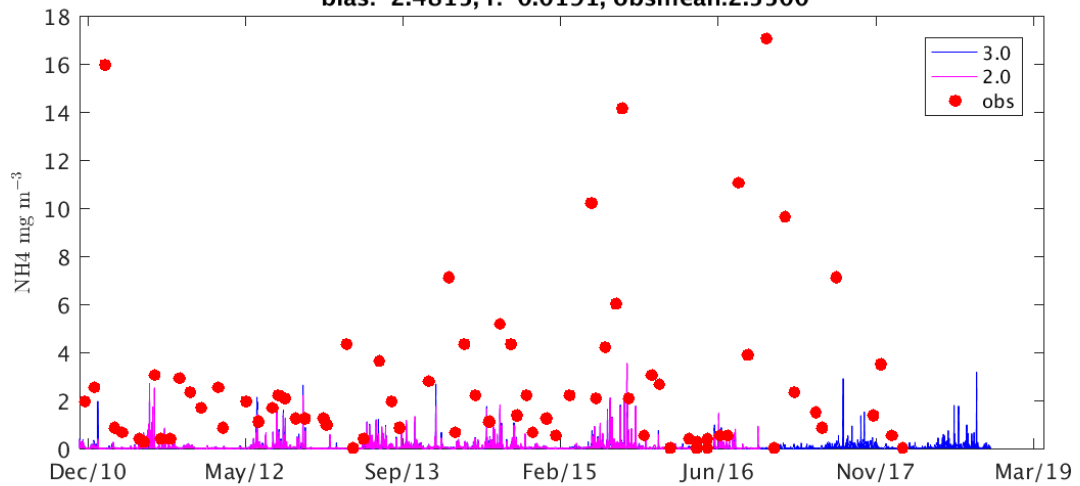

North\_Stradbroke\_0 3.0 d2:0.39, mape:93.1, rms:3.1746  
 bias:-1.9830, r:-0.2707, obsmean:2.0403  
 North\_Stradbroke\_0 2.0 d2:0.39, mape:94.4, rms:3.0627  
 bias:-1.9039, r:-0.2316, obsmean:1.9543

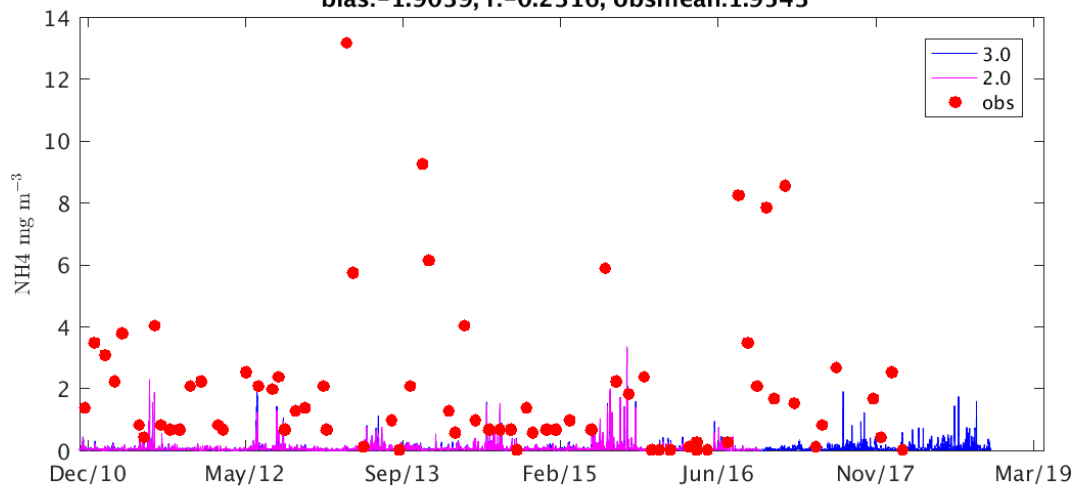

Yongala\_20 3.0 d2:0.34, mape:98.7, rms:2.0681  
 bias:-1.0401, r:0.0360, obsmean:1.1307  
 Yongala\_20 2.0 d2:0.34, mape:90.8, rms:2.3246  
 bias:-1.2796, r:-0.0034, obsmean:1.4260

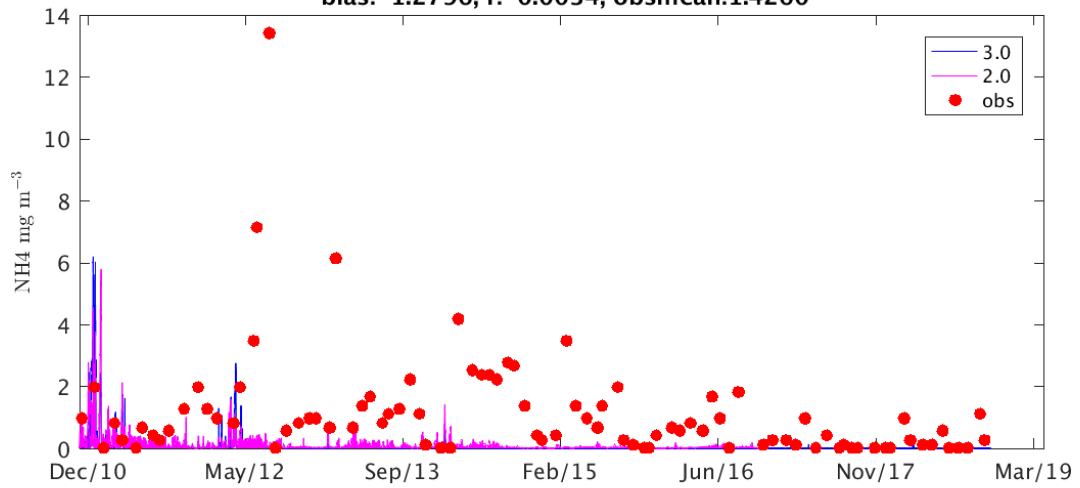

Yongala\_10 3.0 d2:0.42, mape:94.8, rms:1.3301  
 bias:-0.8479, r:0.0321, obsmean:0.8710  
 Yongala\_10 2.0 d2:0.43, mape:92.8, rms:1.4893  
 bias:-1.0194, r:0.0701, obsmean:1.0700

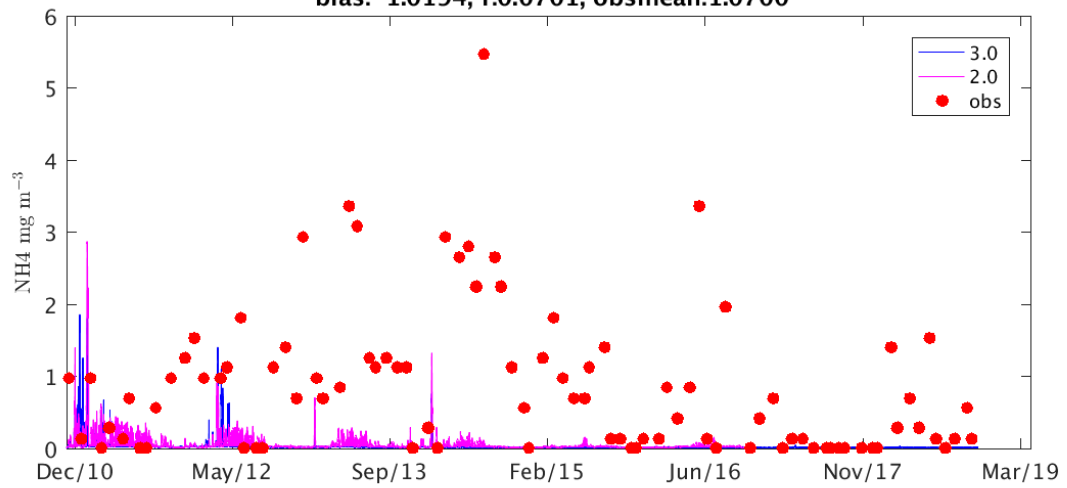

## 24. Simulated DIP assessment against NRS: Yongala and NSI

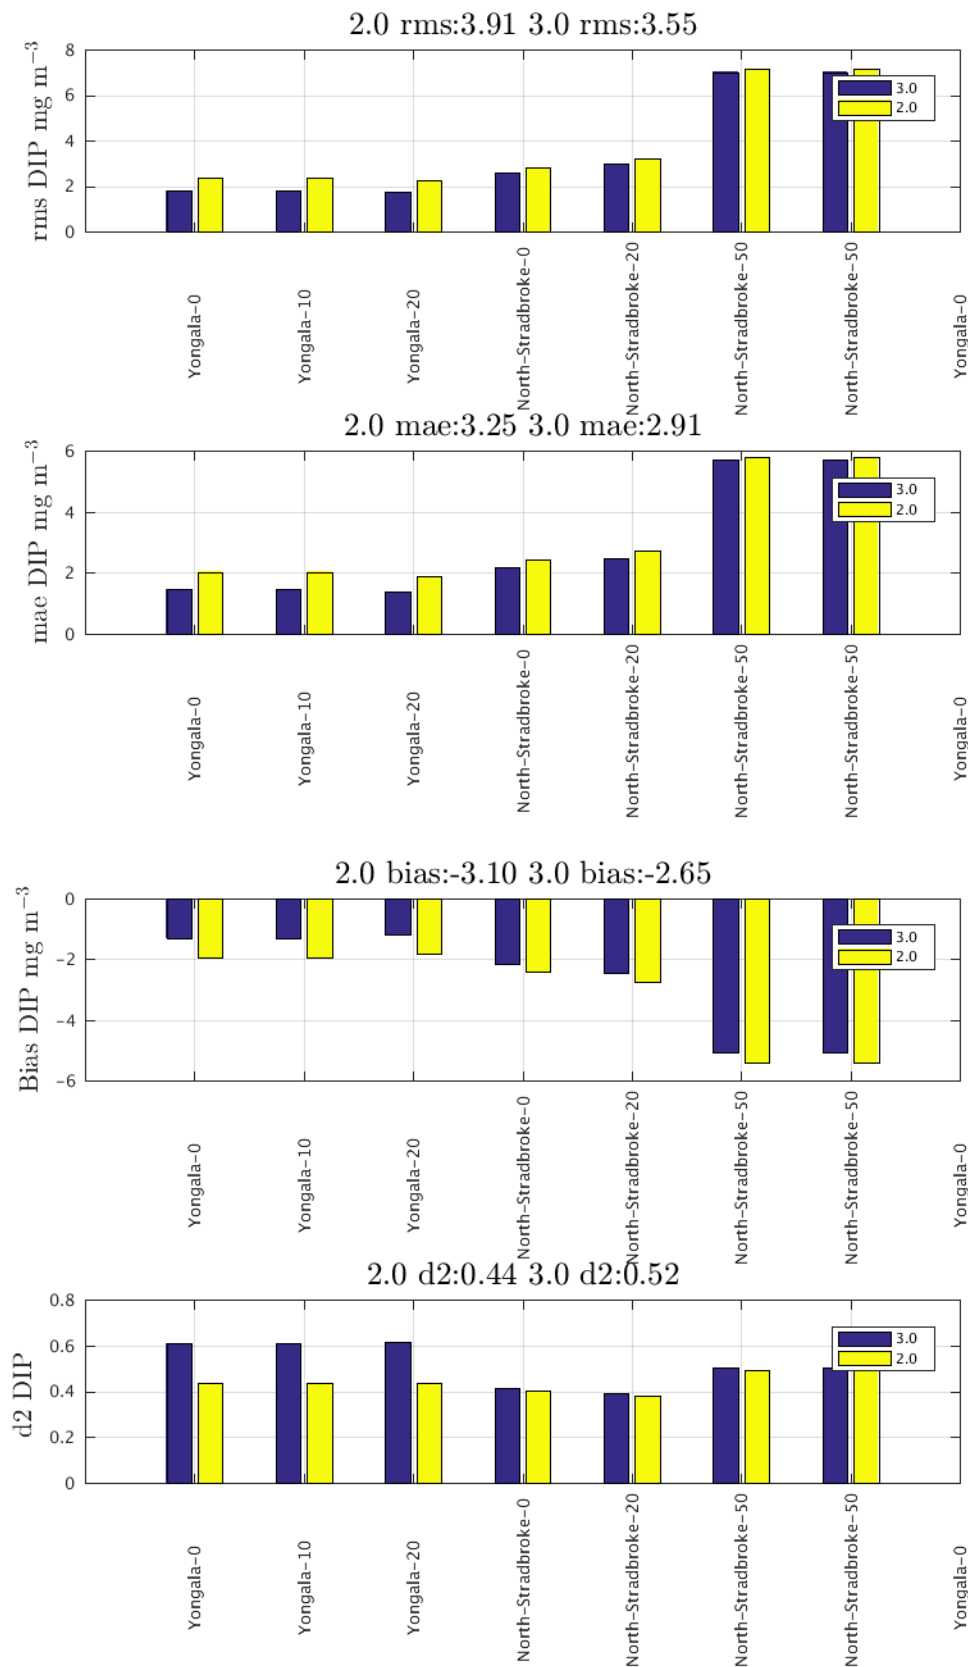

Metrics for IMOS NRS DIP for model version 3p0 and 2p0 d2 = Willmott index see Statistical metric page 27.mae:mean absolute error, rms root mean square

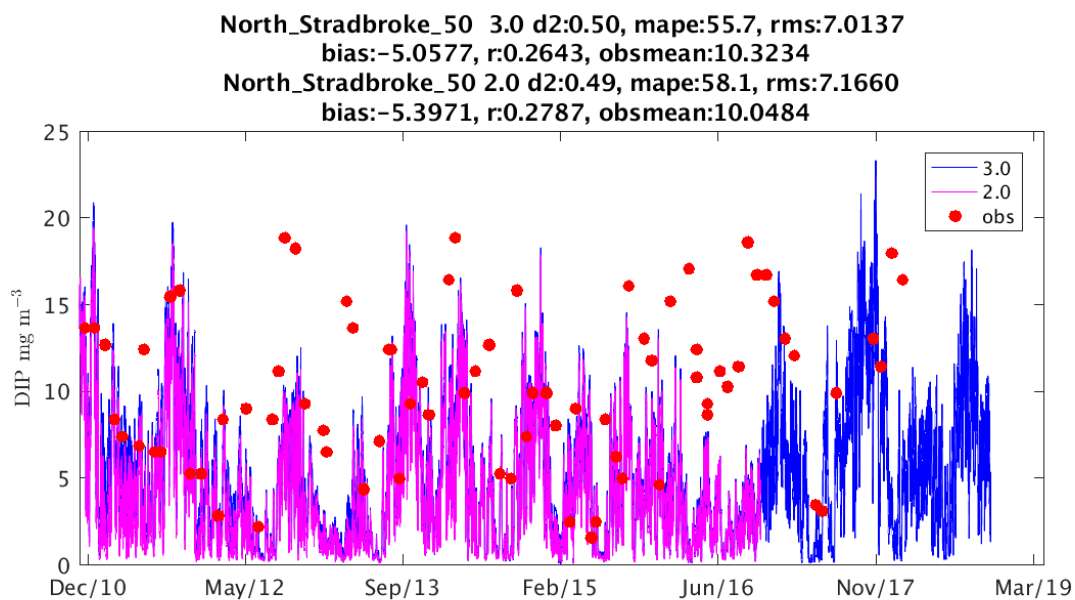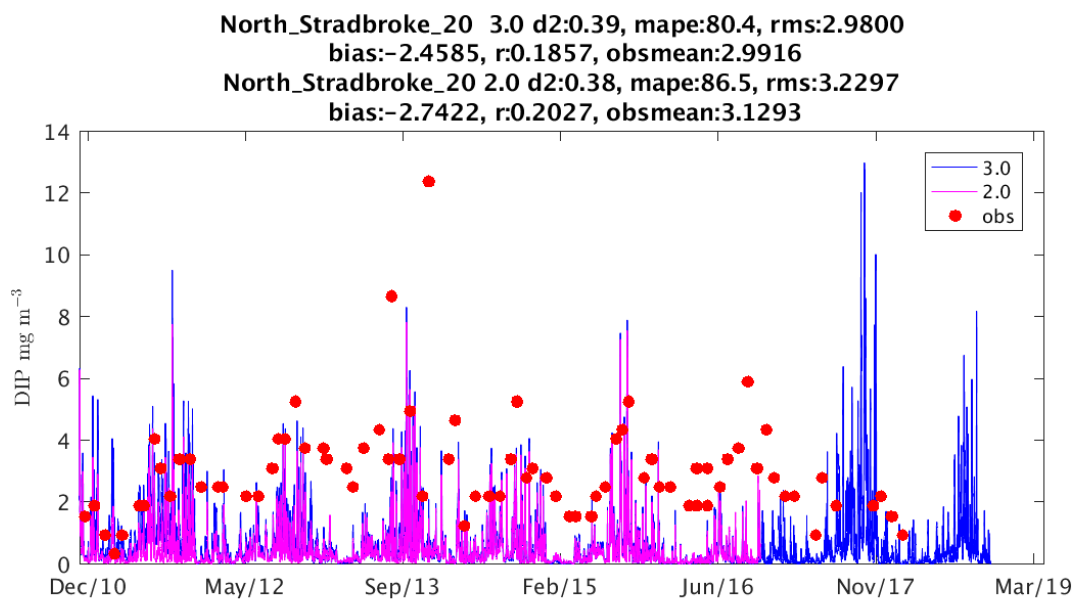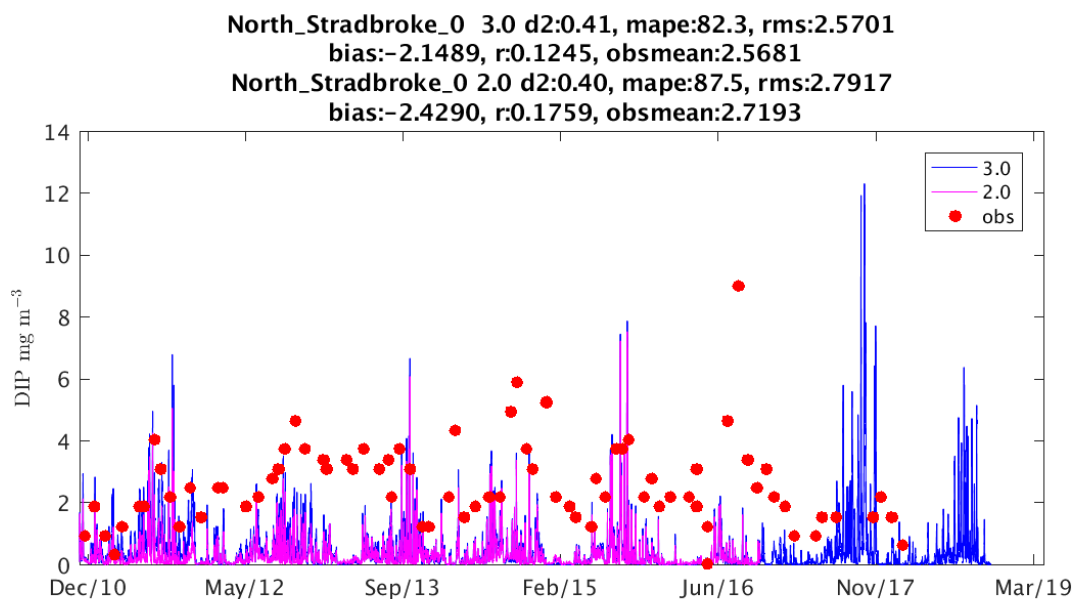

Yongala\_20 3.0 d2:0.61, mape:71.1, rms:1.7303  
 bias:-1.1670, r:0.4977, obsmean:1.9564  
 Yongala\_20 2.0 d2:0.44, mape:80.8, rms:2.2524  
 bias:-1.8252, r:0.2374, obsmean:2.2310

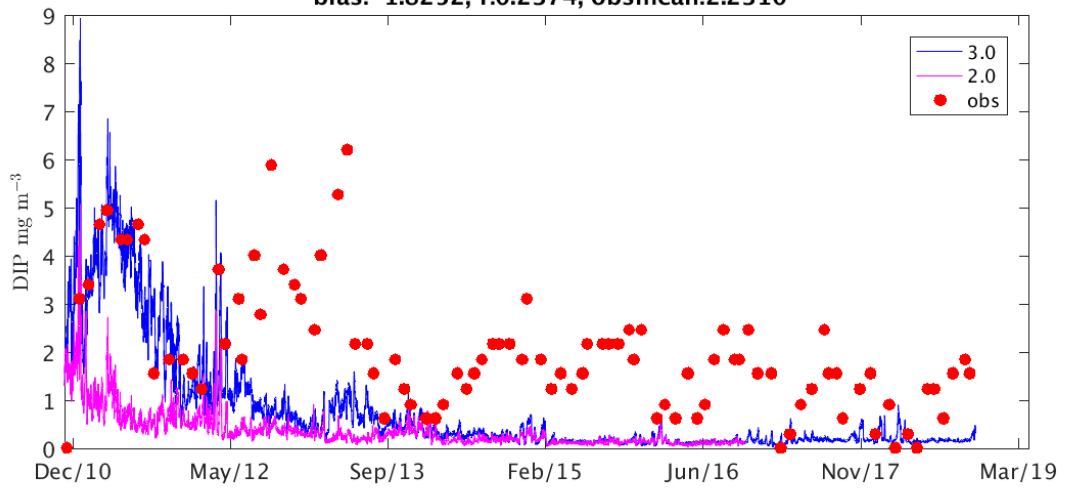

Yongala\_10 3.0 d2:0.61, mape:76.3, rms:1.7752  
 bias:-1.3186, r:0.5422, obsmean:1.9659  
 Yongala\_10 2.0 d2:0.44, mape:87.0, rms:2.3687  
 bias:-1.9618, r:0.3184, obsmean:2.2477

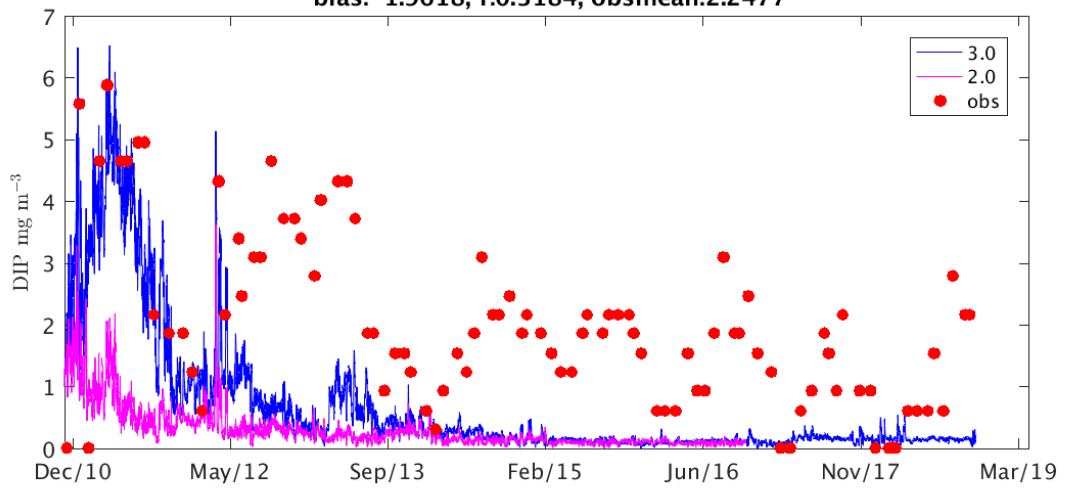

## 25. Simulated DIC assessment against NRS Yongala

**Yongala\_26 3.0 d2:0.58, mape:0.9, rms:251.8943**

**bias:-75.8681, r:0.4184, obsmean:23057.0386**

**Yongala\_26 2.0 d2:0.56, mape:1.1, rms:299.8606**

**bias:-157.4924, r:0.3608, obsmean:23057.0386**

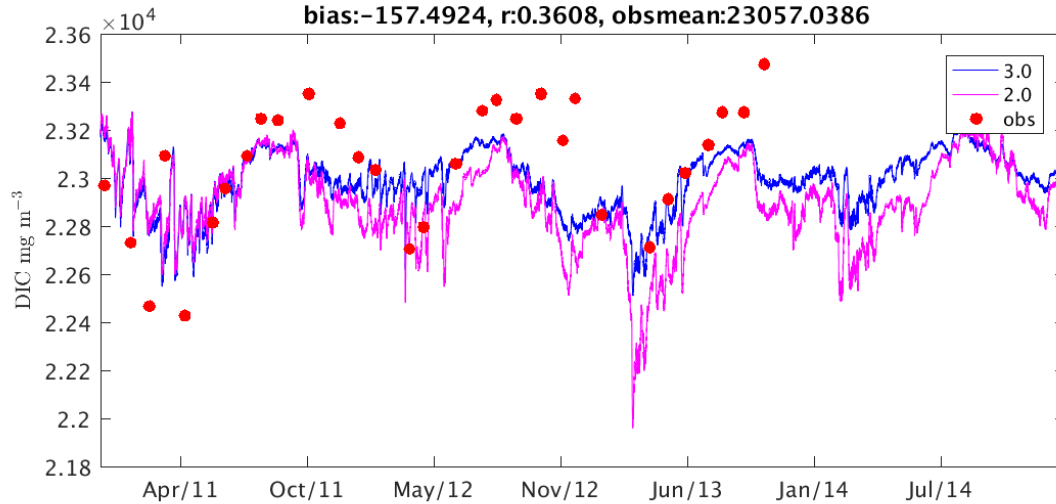

**Yongala\_10 3.0 d2:0.76, mape:0.9, rms:258.2364**

**bias:-44.3495, r:0.7547, obsmean:22989.6377**

**Yongala\_10 2.0 d2:0.69, mape:1.1, rms:310.3398**

**bias:-126.1681, r:0.6250, obsmean:22989.6377**

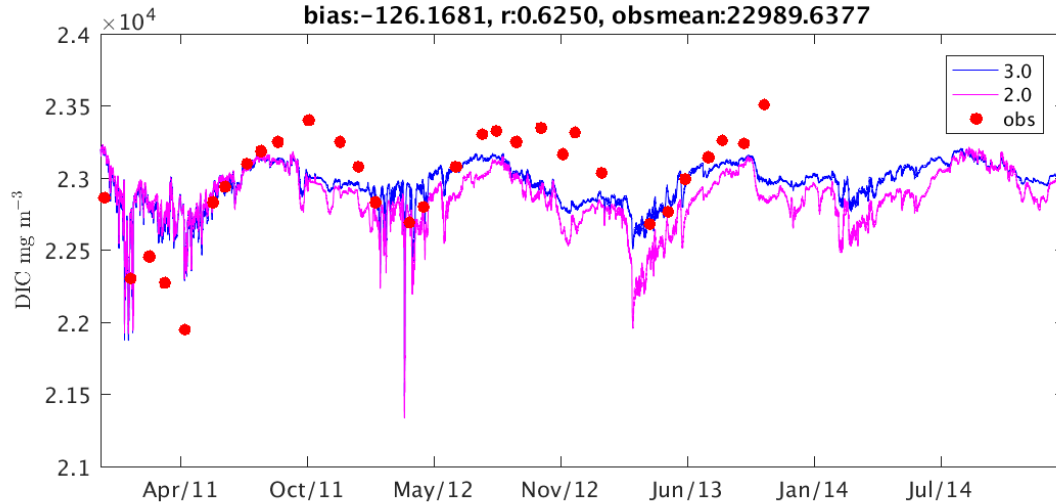

**Yongala\_0 3.0 d2:0.64, mape:1.2, rms:409.6874**

**bias:-2.2563, r:0.7140, obsmean:22933.1885**

**Yongala\_0 2.0 d2:0.57, mape:1.4, rms:452.0324**

**bias:-82.6526, r:0.5539, obsmean:22933.1885**

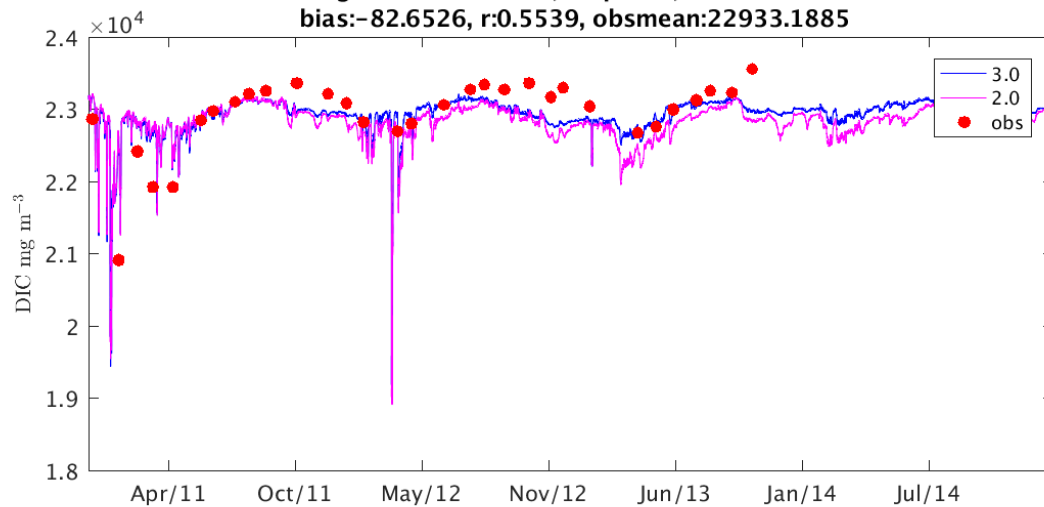

## 26. Simulated alkalinity assessment against NRS Yongala North Stradbroke

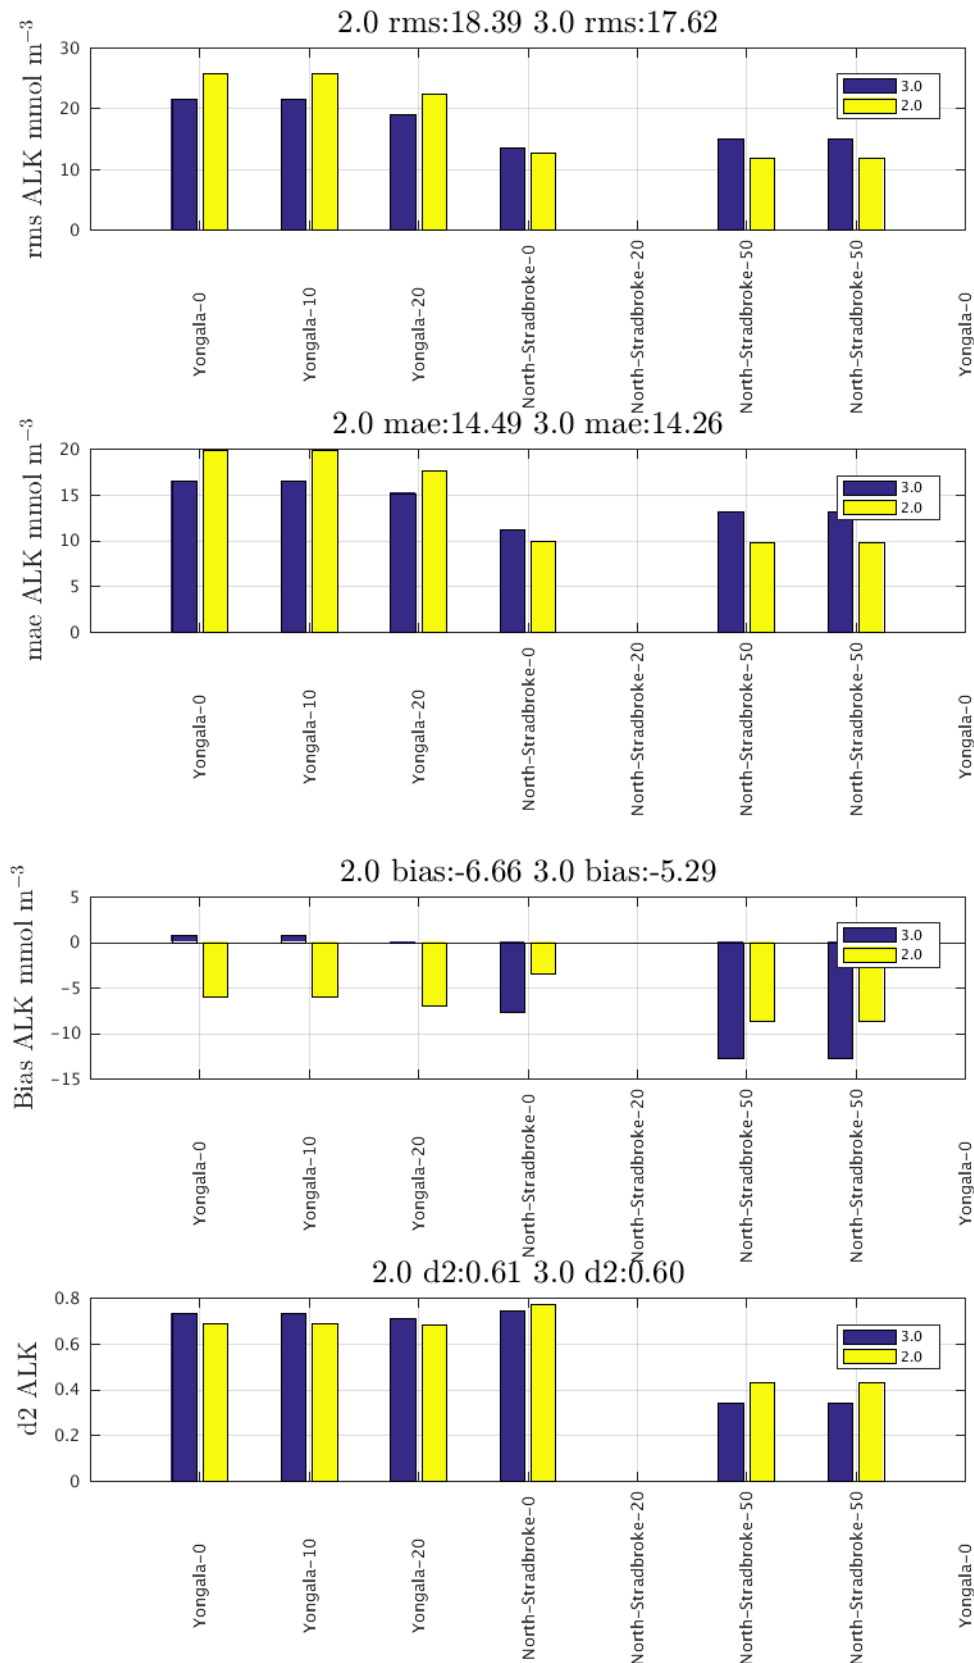



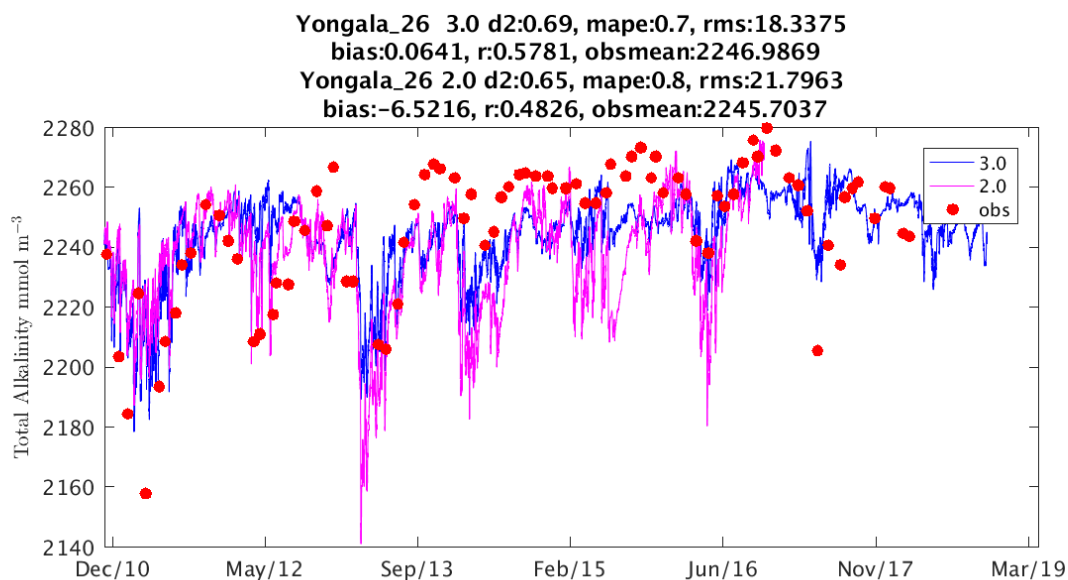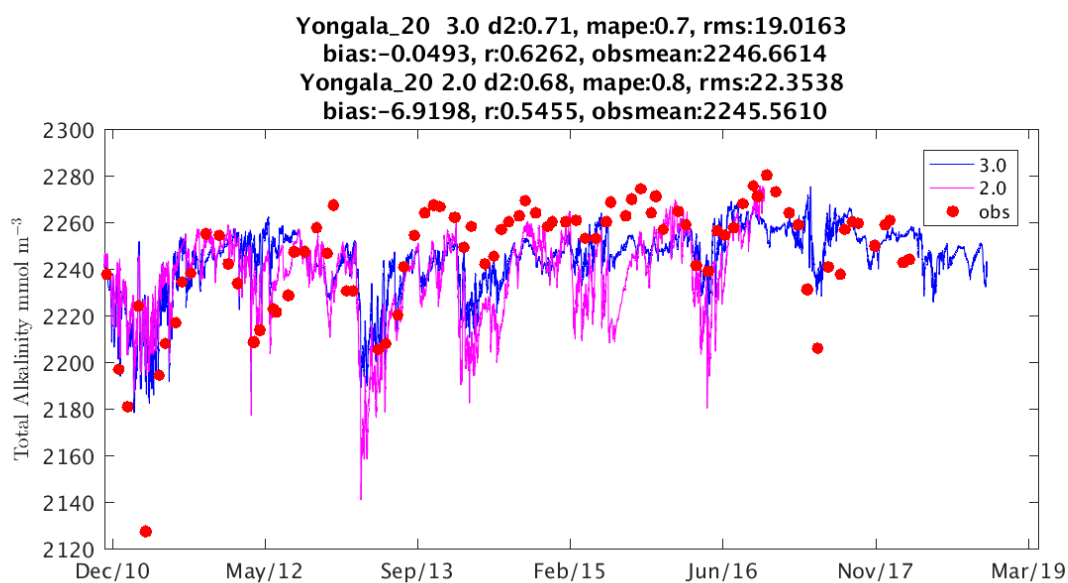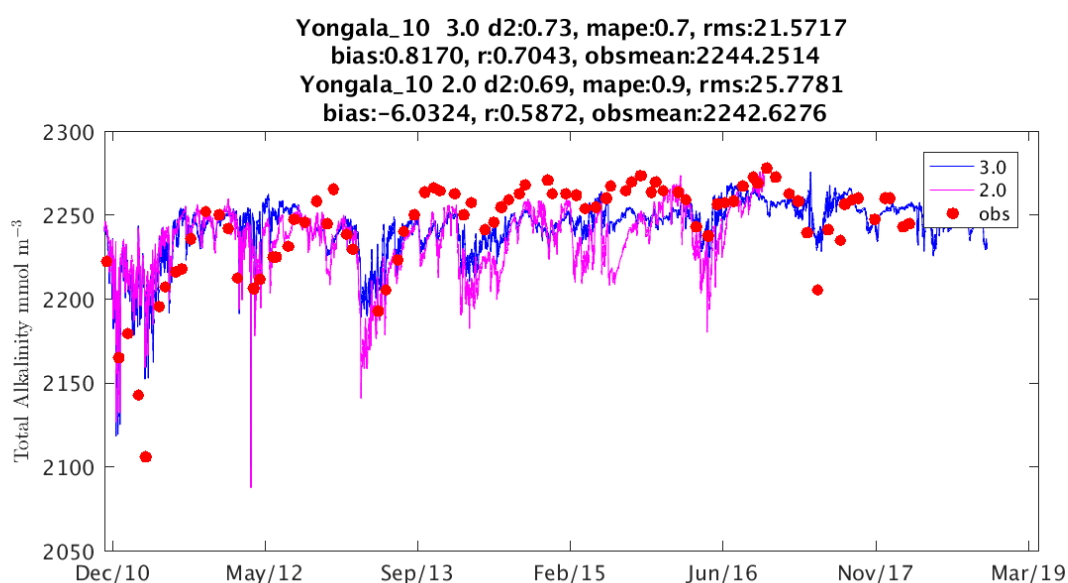

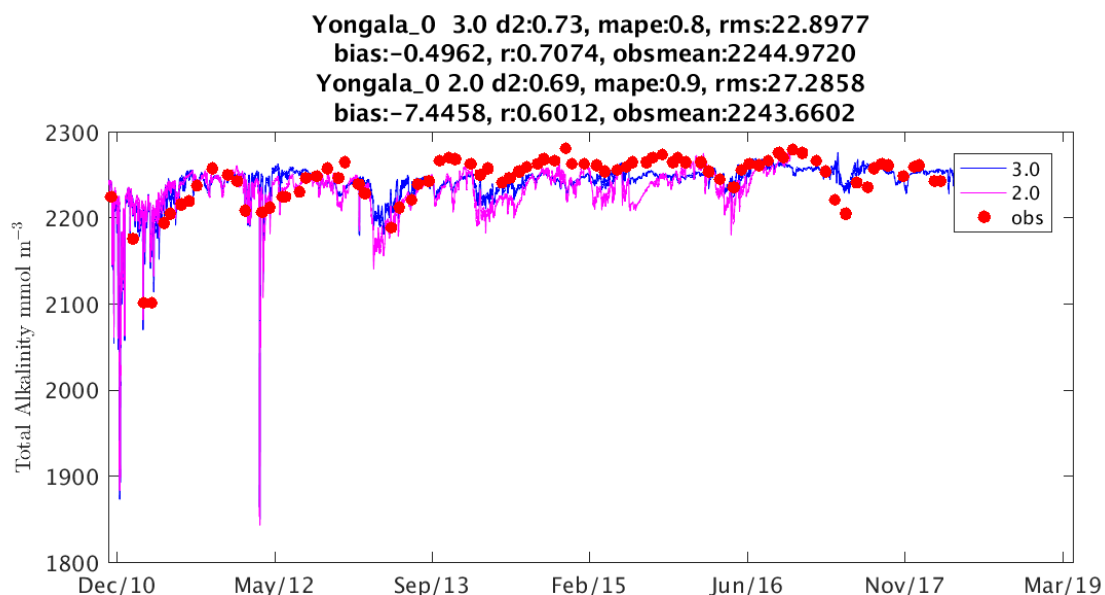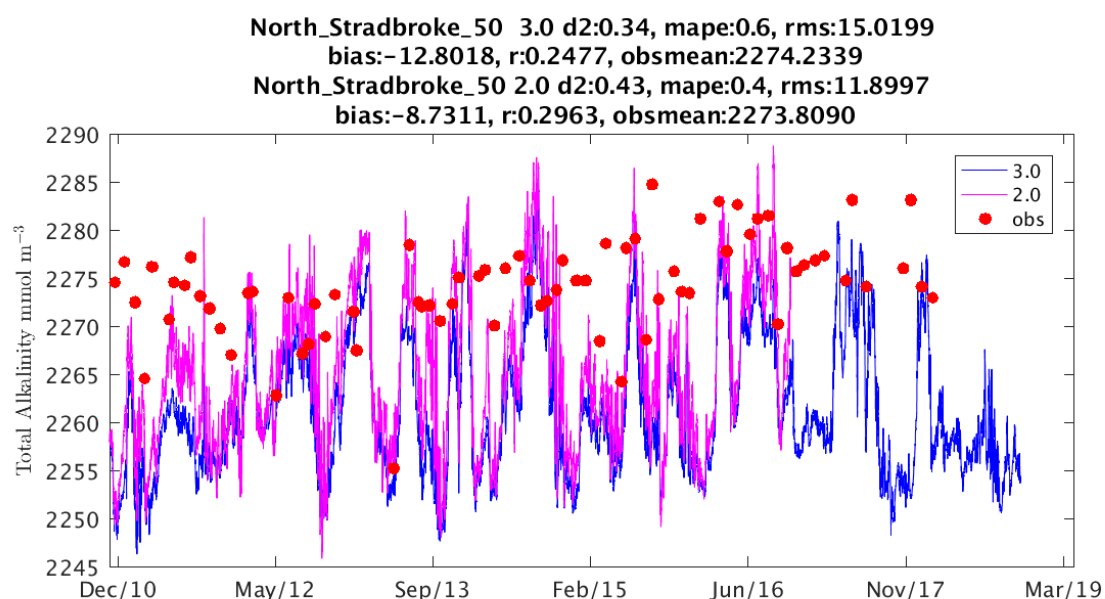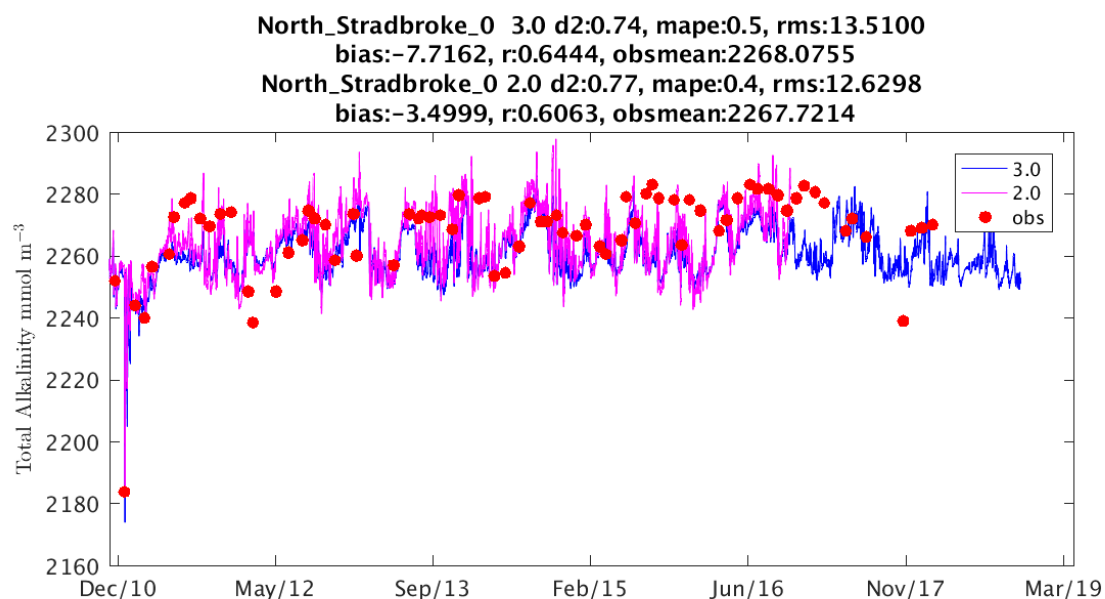

## 27. Simulated aragonite assessment against Yongala

**Yongala\_20 3.0 d2:0.80, mape:3.1, rms:0.1338**

**bias:0.0666, r:0.7046, obsmean:3.5042**

**Yongala\_20 2.0 d2:0.79, mape:3.5, rms:0.1433**

**bias:0.0946, r:0.7560, obsmean:3.5042**

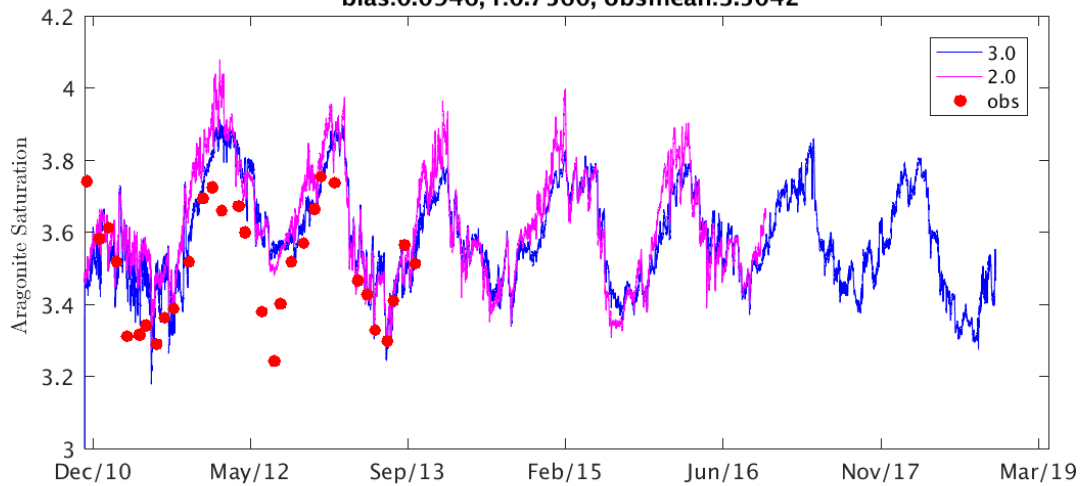

**Yongala\_10 3.0 d2:0.80, mape:3.3, rms:0.1377**

**bias:0.0909, r:0.7704, obsmean:3.4880**

**Yongala\_10 2.0 d2:0.79, mape:3.8, rms:0.1515**

**bias:0.1153, r:0.8071, obsmean:3.4880**

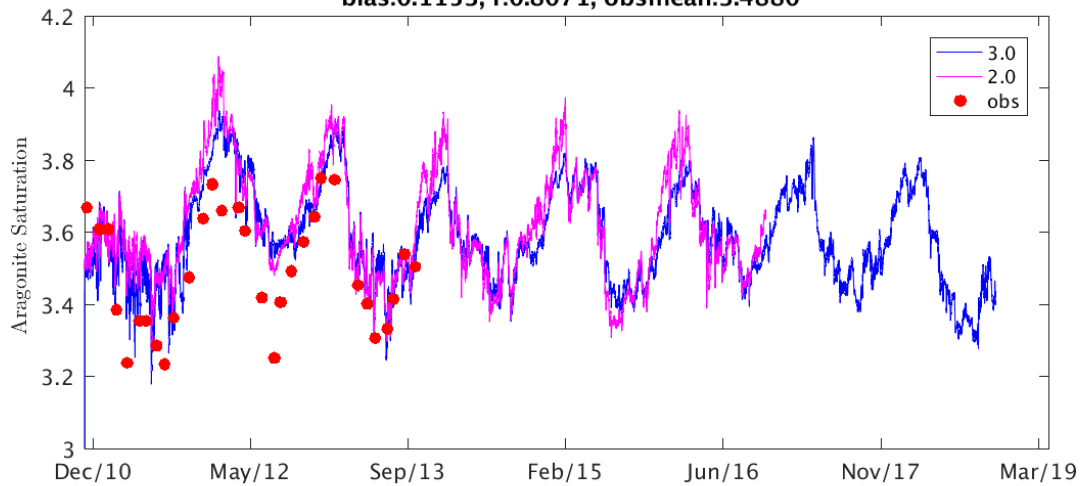

## 28. Wakmatha transect line for carbon chemistry assessment

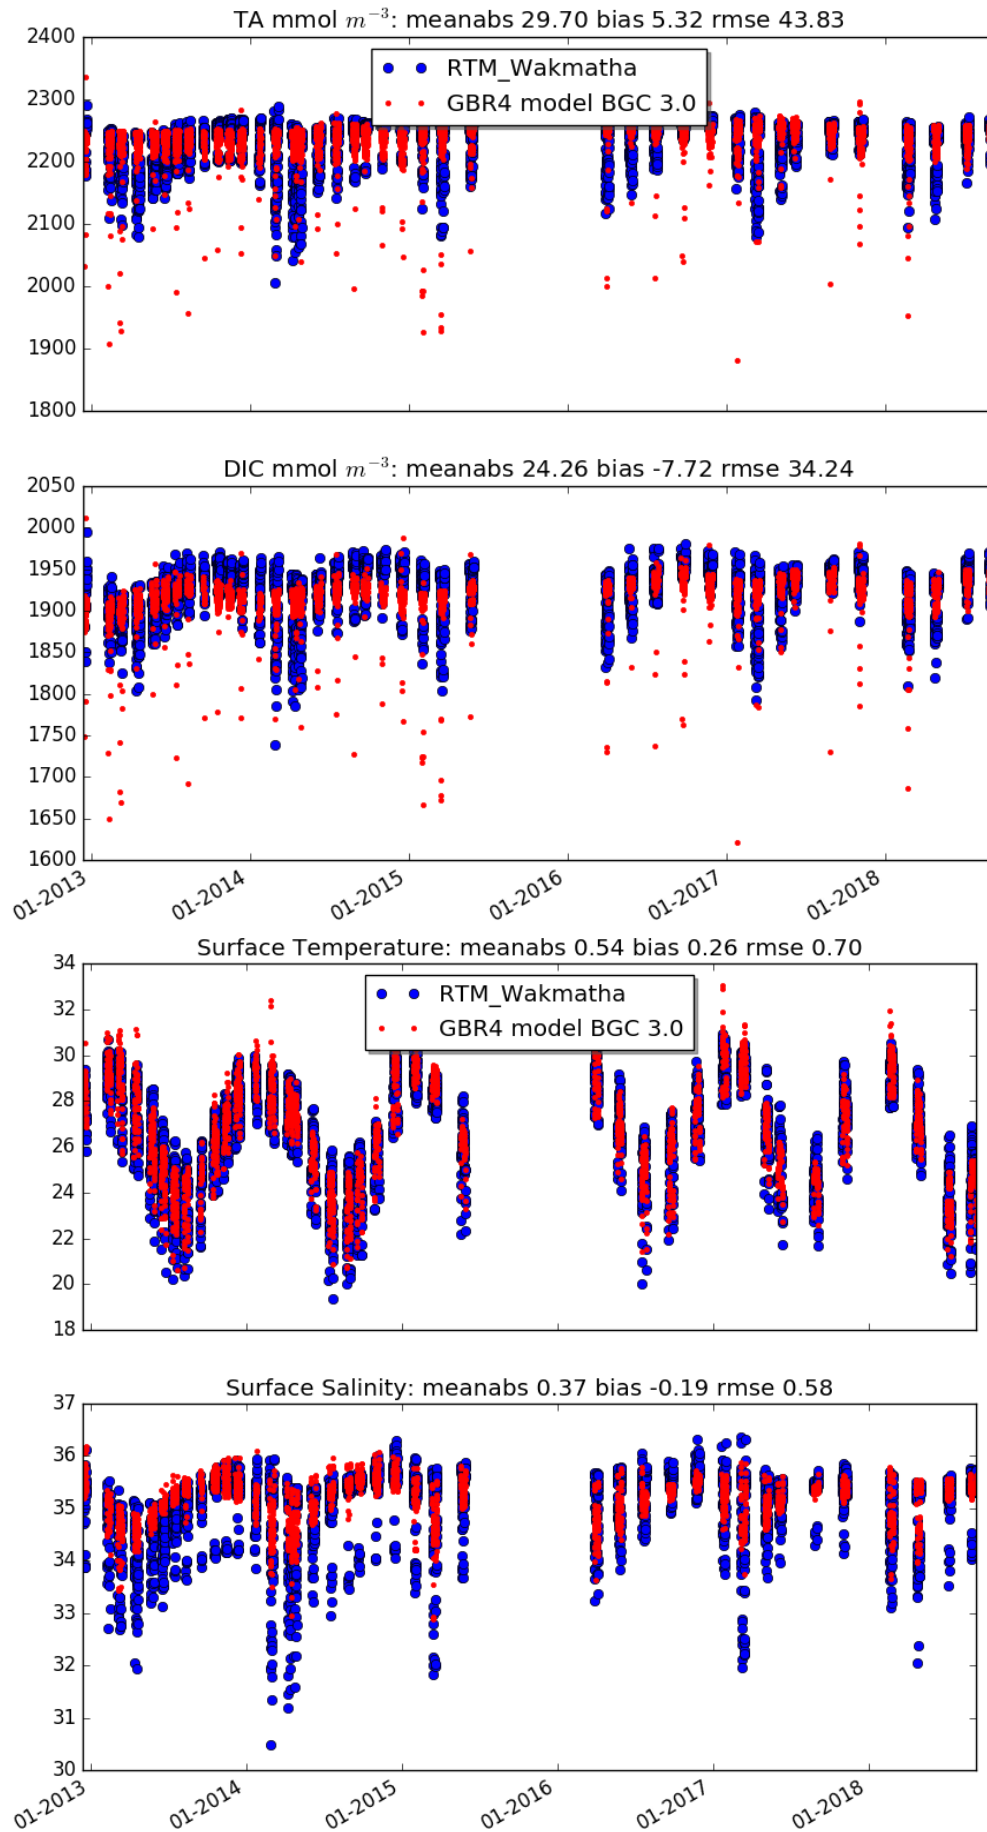

Supplement: Supplementary file 1 [file gmd-13-4503-2020-supplement.zip]
