# Supplementary material for: CSIRO Environmental Modelling Suite (EMS): scientific description of the optical and biogeochemical models (vB3p0)
Source: Copernicus journal article supplement (doi:10.5194/gmd-13-4503-2020), 2020-09-25
Supplement: Supplementary file 2 [file gmd-13-4503-2020-supplement.zip]

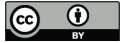

## *Supplement of*

# **CSIRO Environmental Modelling Suite (EMS): scientific description of the optical and biogeochemical models (vB3p0)**

**Mark E. Baird et al.**

*Correspondence to:* Mark E. Baird ([mark.baird@csiro.au](mailto:mark.baird@csiro.au))

- [gmd-13-4503-2020-supplement-title-page.pdf](#)
- [GMD\\_115\\_supplement](#)
  - [GBR4\\_H2p0\\_B3p0\\_Chld\\_Dhnd\\_assessment8aug20.pdf](#)
  - [gmdframe\\_supplement.pdf](#)

The copyright of individual parts of the supplement might differ from the CC BY 4.0 License.
