# Supplementary material for: CSIRO Environmental Modelling Suite (EMS): scientific description of the optical and biogeochemical models (vB3p0)
Source: Copernicus journal article supplement (doi:10.5194/gmd-13-4503-2020), 2020-09-25
Supplement: Supplementary file 3 [file gmd-13-4503-2020-supplement.zip]

***Supplement for:***

**CSIRO Environmental Modelling Suite (EMS): Scientific description of the optical and biogeochemical models (vB3p0).**

Mark E. Baird<sup>1</sup>, Karen A. Wild-Allen<sup>1</sup>, John Parslow<sup>1</sup>, Mathieu Mongin<sup>1</sup>, Barbara Robson<sup>2</sup>, Jennifer Skerratt<sup>1</sup>, Farhan Rizwi<sup>1</sup>, Monika Soja-Wozniak<sup>1</sup>, Emlyn Jones<sup>1</sup>, Mike Herzfeld<sup>1</sup>, Nugzar Margvelashvili<sup>1</sup>, John Andrewartha<sup>1</sup>, Clothilde Langlais<sup>1</sup>, Matthew P. Adams<sup>3</sup>, Nagur Cherukuru<sup>4</sup>, Malin Gustafsson<sup>5</sup>, Scott Hadley<sup>1</sup>, Peter J. Ralph<sup>5</sup>, Uwe Rosebrock<sup>1</sup>, Thomas Schroeder<sup>1</sup>, Leonardo Laiolo<sup>1</sup>, Daniel Harrison<sup>6</sup>, and Andrew D. L. Steven<sup>1</sup>

<sup>1</sup>CSIRO, Oceans and Atmosphere, Hobart, Australia

<sup>2</sup>Australian Institute of Marine Science, Townsville, Australia

<sup>3</sup>School of Mathematical Sciences, Queensland University of Technology, Brisbane, Australia

<sup>4</sup>CSIRO, Land and Water, Canberra, Australia

<sup>5</sup>Plant Functional Biology and Climate Change Cluster, Faculty of Science, University of Technology Sydney, Sydney, Australia

<sup>6</sup>Southern Cross University, Coffs Harbour, Australia

**Correspondence:** Mark Baird (mark.baird@csiro.au)

## 1 Process list of B3p0

The processes described in this paper are for version B3p0, which is invoked with a configuration file listing the processes in each of the domains water, sediment and epibenthic:

```
water
5 {
  tfactor
  viscosity
  moldiff
  values_common
10 remineralization
  microphytobenthos_spectral_grow_wc
  phytoplankton_spectral_grow_wc (small)
  phytoplankton_spectral_grow_wc (large)
  trichodesmium_mortality_wc
15 trichodesmium_spectral_grow_wc
  phytoplankton_spectral_mortality_wc (small)
  phytoplankton_spectral_mortality_wc (large)
  zooplankton_mortality_wc (small)
  zooplankton_mortality_wc (large)
20 zooplankton_large_carnivore_spectral_grow_wc
  zooplankton_small_spectral_grow_wc
  nitrification_wc
  p_adsorption_wc
  carbon_chemistry_wc
25 gas_exchange_wc (carbon, oxygen)
  light_spectral_wc (H, HPLC)
  massbalance_wc
  }
  epibenthos
30 {
  tfactor_epi ()
  values_common_epi ()
  macroalgae_spectral_grow_epi ()
  seagrass_spectral_grow_epi (Zostera)
35 seagrass_spectral_grow_epi (Halophila)
  seagrass_spectral_grow_epi (Deep)
  coral_spectral_grow_bleach_epi ()
```

```

coral_spectral_carb_epi(H)
macroalgae_mortality_epi()
seagrass_spectral_mortality_proto_epi(Zostera)
seagrass_spectral_mortality_proto_epi(Halophila)
5 seagrass_spectral_mortality_proto_epi(Deep)
massbalance_epi()
light_spectral_uq_epi(H)
diffusion_epi()
}
10 sediment
{
tfactor
viscosity
moldiff
15 values_common
remineralization
light_spectral_sed(HPLC)
microphytobenthos_spectral_grow_sed
carbon_chemistry_wc()
20 microphytobenthos_spectral_mortality_sed
phytoplankton_spectral_mortality_sed(small)
phytoplankton_spectral_mortality_sed(large)
zooplankton_mortality_sed(small)
zooplankton_mortality_sed(large)
25 trichodesmium_mortality_sed
nitrification_denitrification_sed
p_adsorption_sed
massbalance_sed()
}

```

30 or alternatively with a call in the configuration file: `PROCESSFNAME B3p0`.

Other processes in the `process_library` can be validly called, but their scientific description is not given in this paper. The header in the source code for each process file gives detail about its use within the code, such as any arguments that it requires (for example `seagrass_spectral_grow_epi` requires the seagrass type as an argument).

## 2 Code architecture

This paper is a scientific description of the EMS ecological library (`/EMS/model/lib/ecology`). The ecological library consists primarily of a set of routines describing individual processes. The model chooses which processes it will include based on a configuration file (App. 1 provides the configuration file for B3p0). The model equations are primarily derivatives of the ecological state variables, and have been split in this paper into separate processes (such as a phytoplankton growth), thus aligning with the code (such as `phytoplankton_spectral_grow_wc.c`). This object-based approach allows individual processes to be included / excluded in a configuration file without re-writing the model code.

- Within a process file, the routine containing the ecological derivatives is `<process_name>_calc`, and within that routine the ecological derivatives are stored within the array `y1`. Each element in the array `y1` stores the derivatives of a state variable.
- 10 The index to the array for each state variable is determined within each process initialisation routine, `<process_name>_init`, and stored in the processes' workspace `ws`. In the case of nitrate, for example, the derivative held in `y1` will be the sum of the derivatives calculated in multiple processes (such as each autotrophic growth process, nitrification, denitrification, and each grazing and mortality process). The array of derivatives is then used by the model's adaptive integrator to update the model state, as held in the array `y`.
- 15 Some components of the ecological model are updated only once every time step without the derivatives being calculated. These include the optical and carbon chemistry model state variables. In these cases, the state variables, which are stored in the array `y`, are updated directly and this is done in either the routine `<process_name>_precalc` or `<process_name>_postcalc`.

3 State (prognostic) variables

The below tables list the ecologically-relevant physical variables (Table 1), 10 dissolved (Table 2), 20 microalgal (Table 3), 2 zooplankton (Table 4), 7 non-living inorganic particulate (Table 5), 7 non-living organic particulate (Table 6) and 7 epibenthic plant (Table 7) and 5 coral polyp (Table 8) and 4 reaction centre (Table 9) state variables. All state variables that exist in the water column layers have an equivalent in the sediment layers (and are specified by <variable name>\_sed). The dissolved tracers are given as a concentration in the porewater, while the particulate tracers are given as a concentration per unit volume.

| Name                               | Symbol         | Units             | Description                                                                                                                                                                          |
|------------------------------------|----------------|-------------------|--------------------------------------------------------------------------------------------------------------------------------------------------------------------------------------|
| Temperature (temp)                 | $T$            | °C                | Water temperature                                                                                                                                                                    |
| Salinity (salt)                    | $S$            | PSU               | Water salinity                                                                                                                                                                       |
| Sea level elevation (eta)          | $\eta$         | m                 | Sea level elevation relative to mean sea level                                                                                                                                       |
| Porosity (porosity)                | $\phi$         | -                 | Fraction of the volume made up of water                                                                                                                                              |
| Bottom shear stress (us-trcw_skin) | $\tau$         | N m <sup>-2</sup> | Shear stress due to currents and waves                                                                                                                                               |
| Sand ripple height (PHYS-RIPH)     | -              | m                 | Physical dimension used for estimating bottom roughness due to ripples according to ?                                                                                                |
| Solar zenith (Zenith)              | $\theta_{air}$ | radians           | Solar zenith angle is the angle between the zenith and the centre of the Sun's disc, taking a value of zero with the sun directly above, and $\pi/2$ when at, or below, the horizon. |

**Table 1.** Long name (and variable name) in model output files, symbol and units used in this document, and a description of ecologically-relevant physical state and diagnostic variables.

| Name                                 | Symbol            | Units                | Description                                                                                                                                                                                                                                                                                  |
|--------------------------------------|-------------------|----------------------|----------------------------------------------------------------------------------------------------------------------------------------------------------------------------------------------------------------------------------------------------------------------------------------------|
| Total alkalinity (alk)               | $A_T$             | $\text{mol kg}^{-1}$ | Concentration of ions that can be converted to uncharged species by a strong acid. The model assumes $A_T = [\text{HCO}_3^-] + [\text{CO}_3^{2-}]$ , often referred to as carbonate alkalinity. Alkalinity and DIC together quantify the equilibrium state of the seawater carbon chemistry. |
| Nitrate (NO3)                        | $[\text{NO}_3^-]$ | $\text{mg N m}^{-3}$ | Concentration of nitrate. In the absence of nitrite $[\text{NO}_2^-]$ in the model, nitrate represents $[\text{NO}_3^-] + [\text{NO}_2^-]$ .                                                                                                                                                 |
| Ammonium (NH4)                       | $[\text{NH}_4^-]$ | $\text{mg N m}^{-3}$ | Concentration of dissolved ammonium.                                                                                                                                                                                                                                                         |
| Dissolved Inorganic Phosphorus (DIP) | $P$               | $\text{mg P m}^{-3}$ | Concentration of dissolved inorganic phosphorus, also referred to as orthophosphate or soluble reactive phosphorus, SRP, composed chiefly of $\text{HPO}_4^{2-}$ ions, with a small percentage present as $\text{PO}_4^{3-}$ .                                                               |
| Dissolved inorganic carbon (DIC)     | $\text{DIC}$      | $\text{mg C m}^{-3}$ | Concentration of dissolved inorganic carbon, composed chiefly at seawater pH of $\text{HCO}_3^-$ , with a small percentage present as $\text{CO}_3^{2-}$ .                                                                                                                                   |
| Dissolved oxygen (Oxygen)            | $[\text{O}_2]$    | $\text{mg O m}^{-3}$ | Concentration of oxygen.                                                                                                                                                                                                                                                                     |
| Chemical Oxygen Demand (COD)         | $\text{COD}$      | $\text{mg O m}^{-3}$ | Concentration of products of anoxic respiration in oxygen units. This represents products such as hydrogen sulfide, $\text{H}_2\text{S}$ , that are produced during anoxic respiration and which, upon reoxidation of the water, will consume oxygen.                                        |
| Dissolved Organic Carbon (DOR_C)     | $O_C$             | $\text{mg C m}^{-3}$ | The concentration of carbon in dissolved organic compounds.                                                                                                                                                                                                                                  |
| Dissolved Organic Nitrogen (DOR_N)   | $O_N$             | $\text{mg N m}^{-3}$ | The concentration of nitrogen in dissolved organic compounds.                                                                                                                                                                                                                                |
| Dissolved Organic Phosphorus (DOR_P) | $O_P$             | $\text{mg P m}^{-3}$ | The concentration of phosphorus in dissolved organic compounds.                                                                                                                                                                                                                              |

**Table 2.** Long name (and variable name) in model output files, symbol and units used in this document, and a description of all dissolved state variables. When the concentration of an ion is given, the chemical formulae appears in [ ] brackets.

| Name                              | Symbol & Units                                                           | Description                                                                                                                                                                                                                                                                                                                                                                                                                                                                                                                                             |
|-----------------------------------|--------------------------------------------------------------------------|---------------------------------------------------------------------------------------------------------------------------------------------------------------------------------------------------------------------------------------------------------------------------------------------------------------------------------------------------------------------------------------------------------------------------------------------------------------------------------------------------------------------------------------------------------|
| Phytoplankton (*_N)               | N $B$ [mg N m <sup>-3</sup> ]                                            | Total structural biomass of nitrogen of the phytoplankton population. All microalgae have a C:N:P ratio of the structural material of 106:16:1. Thus the mass of phosphorus in the structural material of a population with a biomass $B$ is given by: $\frac{1}{16} \frac{31}{14} B$ and the mass of carbon by: $\frac{106}{16} \frac{12}{14} B$ . The number of cells is given by $B/m_N$ .                                                                                                                                                           |
| Phytoplankton reserves (*_NR)     | N $BR_N^*$ [mg N m <sup>-3</sup> ]                                       | Total non-structural biomass of nitrogen of the phytoplankton population. Phytoplankton N reserves divided by Phytoplankton N is a number between 0 and 1 and represents the factor by which phytoplankton growth is inhibited due to the internal reserves of nitrogen.                                                                                                                                                                                                                                                                                |
| Phytoplankton P reserves (*_PR)   | re- $\frac{1}{16} \frac{31}{14} BR_P^*$ [mg P m <sup>-3</sup> ]          | Total non-structural biomass of phosphorus of the phytoplankton population. Phytoplankton P reserves divided by (Phytoplankton N $\times \frac{1}{16} \frac{31}{14}$ ) is a number between 0 and 1 and represent the factor by which phytoplankton growth is inhibited due to the internal reserves of phosphorus.                                                                                                                                                                                                                                      |
| Phytoplankton I reserves (*_I)    | re- $\frac{1060}{16} \frac{1}{14} BR_I^*$ [mmol photon m <sup>-3</sup> ] | Total non-structural biomass of fixed carbon of the phytoplankton population, quantified in photons. Phytoplankton I reserves divided by (Phytoplankton N $\times \frac{1060}{16} \frac{1}{14}$ ) is a number between 0 and 1 and represent the factor by which phytoplankton growth is inhibited due to the internal reserves of energy (or fixed carbon).                                                                                                                                                                                             |
| Phytoplankton chlorophyll (*_Chl) | $nc_i V$ [mg m <sup>-3</sup> ]                                           | Concentration of the chlorophyll $a$ pigment of the population. The four phytoplankton classes have two pigments, a chlorophyll $a$ -based pigment and an accessory pigment. As the pigment concentration adjusts to optimise photosynthesis, including the presence of the accessory pigment, the intracellular content, $c_i V$ , represents only the chlorophyll $a$ -based pigment. As the model does not distinguish between mono-vinyl and di-vinyl forms of chlorophyll, this $c_i$ represents either form, depending on the phytoplankton type. |

**Table 3.** Long name (and variable name) in model output files, symbol and units used in this document, and description of all microalgae state variables in the model. The model contains four categories of phytoplankton (category shown as \* in left column, and given in brackets in following list): small (PhyS),  $r < 2 \mu\text{m}$  phytoplankton; large (PhyL):  $r > 2 \mu\text{m}$  phytoplankton; *Trichodesmium* (Tricho): nitrogen fixing phytoplankton; and benthic microalgae (MPB): fast-sinking diatoms that are suspended primarily in the top layer of sediment porewaters. The elemental ratio of phytoplankton including both structural material and reserves is given by: C:N:P =  $106(1 + R_C^*) : 16(1 + R_N^*) : (1 + R_P^*)$ . In the model description (this document) we have more correctly described fixed carbon as carbon reserves, while in the model outputs they are represented quantified as energy reserves. The relationship is 1 mg C of carbon reserves is equal to  $(1060/106)/12.01$  mmol photons of energy reserves.

| Name        |   | Symbol     | Units                   | Description                                                                                                                                                                                                                                                                                                                                                                                                 |
|-------------|---|------------|-------------------------|-------------------------------------------------------------------------------------------------------------------------------------------------------------------------------------------------------------------------------------------------------------------------------------------------------------------------------------------------------------------------------------------------------------|
| Zooplankton | N | (ZooS_N, Z | [mg N m <sup>-3</sup> ] | Total biomass of nitrogen in animals. With only small and large zooplankton categories                                                                                                                                                                                                                                                                                                                      |
| ZooL_N)     |   |            |                         | resolved, small zooplankton represents the biomass of unicellular fast growing animals (protozoans) and large zooplankton represents the biomass of all other animals (metazoans). All zooplankton have a C:N:P ratio of 106:16:1. Thus the mass of phosphorus of a population with a biomass $Z$ is given by: $\frac{1}{16} \frac{31}{14} Z$ and the mass of carbon by: $\frac{106}{16} \frac{12}{14} Z$ . |

**Table 4.** Long name (and variable name) in model output files, symbol, unit used in this document, and description of zooplankton state variables in the model.



| Name                                | Symbol                            | Units                 | Description                                                                                                                                                                                 |
|-------------------------------------|-----------------------------------|-----------------------|---------------------------------------------------------------------------------------------------------------------------------------------------------------------------------------------|
| Fine Sediment (FineSed)             | <i>FineSed</i>                    | [kg m <sup>-3</sup> ] | Identical to Mud-mineral, except that it is initialised to zero in the model domain, and enters only from the catchments.                                                                   |
| Dust (Dust)                         | <i>Dust</i>                       | [kg m <sup>-3</sup> ] | Very small sized, re-suspending particles with a sinking velocity of 1 m d <sup>-1</sup> and mass-specific optical properties based on observations in Gladstone Harbour.                   |
| Mud-mineral (Mud-mineral)           | <i>Mud<sub>non-CaCO3</sub></i>    | [kg m <sup>-3</sup> ] | Small sized, re-suspending particles with a sinking velocity of 17 m d <sup>-1</sup> , and mass-specific optical properties based on observations in Gladstone Harbour.                     |
| Mud-carbonate (Mud-carbonate)       | <i>Mud<sub>CaCO3</sub></i>        | [kg m <sup>-3</sup> ] | Small sized, re-suspending particles with a sinking velocity of 17 m d <sup>-1</sup> , and mass-specific optical properties based on observations of suspended carbonates at Lucinda Jetty. |
| Sand-mineral (Sand-mineral)         | <i>Sand<sub>non-CaCO3</sub></i>   | [kg m <sup>-3</sup> ] | Medium sized, re-suspending particles with a sinking velocity of 173 m d <sup>-1</sup> and mass-specific optical properties based on observations in Gladstone Harbour.                     |
| Sand-carbonate (Sand-carbonate)     | <i>Sand<sub>CaCO3</sub></i>       | [kg m <sup>-3</sup> ] | Medium sized, re-suspending particles with a sinking velocity of 173 m d <sup>-1</sup> and mass-specific optical properties based on observations of suspended carbonates at Lucinda Jetty. |
| Gravel-mineral (Gravel-mineral)     | <i>Gravel<sub>non-CaCO3</sub></i> | [kg m <sup>-3</sup> ] | Large, non-resuspending particles.                                                                                                                                                          |
| Gravel-carbonate (Gravel-carbonate) | <i>Gravel<sub>CaCO3</sub></i>     | [kg m <sup>-3</sup> ] | Large, non-resuspending particles.                                                                                                                                                          |

**Table 5.** Long name (and variable name) in model output files, symbol, unit used in this document, and description of all inorganic particulate state variables in the model.

| Name                                                | Symbol    | Units                 | Description                                                                                                                                                                                                                                                                                                                                                                   |
|-----------------------------------------------------|-----------|-----------------------|-------------------------------------------------------------------------------------------------------------------------------------------------------------------------------------------------------------------------------------------------------------------------------------------------------------------------------------------------------------------------------|
| Particulate Inorganic Phosphorus (PIP)              | $P/IP$    | [mg m <sup>-3</sup> ] | P Phosphorus ions that are absorbed onto particles. It is considered a particulate with the same properties as Mud.                                                                                                                                                                                                                                                           |
| Immobilised Particulate Inorganic Phosphorus (PIPI) | $P/IPI$   | [mg m <sup>-3</sup> ] | P Phosphorus that is permanently removed from the system through burial of PIP.                                                                                                                                                                                                                                                                                               |
| Labile Detritus Nitrogen Plank (DetPL_N)            | $D_{Red}$ | [mg m <sup>-3</sup> ] | N Concentration of N in labile (quickly broken down) organic matter with a C:N:P ratio of 106:16:1 derived from living microalgae, zooplankton, coral host tissue and zooxanthellae with the same C:N:P ratio. Thus the mass of phosphorus in $D_{Red}$ is given by: $\frac{1}{16} \frac{31}{14} D_{Red}$ and the mass of carbon by: $\frac{106}{16} \frac{12}{14} D_{Red}$ . |
| Labile Detritus Nitrogen Ben-thic (DetBL_N)         | $D_{Atk}$ | [mg m <sup>-3</sup> ] | N Concentration of N in labile (quickly broken down) organic matter with a C:N:P ratio of 550:30:1 derived from living seagrass and macroalgae with the same C:N:P ratio. Thus the mass of phosphorus in $D_{Atk}$ is given by: $\frac{1}{30} \frac{31}{14} D_{Atk}$ and the mass of carbon by: $\frac{550}{30} \frac{12}{14} D_{Atk}$ .                                      |
| Refractory Detritus Carbon (DetR_C)                 | $D_C$     | [mg m <sup>-3</sup> ] | C Concentration of carbon as particulate refractory (slowly breaking down) material. It is sourced only from the breakdown of labile detritus, and from rivers.                                                                                                                                                                                                               |
| Refractory Detritus Nitrogen (DetR_N)               | $D_N$     | [mg m <sup>-3</sup> ] | N Concentration of nitrogen as particulate refractory (slowly breaking down) material. It is sourced only from the breakdown of labile detritus, and from rivers.                                                                                                                                                                                                             |
| Refractory Detritus Phosphorus (DetR_P)             | $D_P$     | [mg m <sup>-3</sup> ] | P Concentration of phosphorus as particulate refractory (slowly breaking down) material. It is sourced only from the breakdown of labile detritus, and from rivers.                                                                                                                                                                                                           |

**Table 6.** Long name (and variable name) in model output files, symbol, unit used in this document, and description of all particulate detrital state variables in the model.

| Name                   | Symbol                                 | Description                                                                                                                                                                                                                                                                                                                                                                                                                                                                                                                                                  |
|------------------------|----------------------------------------|--------------------------------------------------------------------------------------------------------------------------------------------------------------------------------------------------------------------------------------------------------------------------------------------------------------------------------------------------------------------------------------------------------------------------------------------------------------------------------------------------------------------------------------------------------------|
| Macroalgae<br>(MA)     | $MA \text{ [g N m}^{-2}\text{]}$       | Concentration of nitrogen biomass per $\text{m}^2$ of macroalgae. Macroalgae (or seaweed) grows above all other benthic plants (corals, seagrasses, benthic microalgae). It is parameterised as a non-calcifying leafy algae, with a C:N:P ratio of 550:30:1, and a formulation for calculating the percentage of the bottom covered as $1 - \exp(-\Omega_{MA} MA)$ . In the model, in the absence of both calcifying macroalgae (particularly <i>Halimeda</i> ) and unicellular epiphytes, macroalgae represents the biomass of all seaweeds and epiphytes. |
| Seagrass (SG)          | $SG \text{ [g N m}^{-2}\text{]}$       | Concentration of nitrogen biomass per $\text{m}^2$ of a seagrass form parameterised to be similar to <i>Zostera</i> . This form captures light after it has passed through macroalgae and before it passes through <i>Halophila</i> . This form is better adapted to high light, low nutrient conditions than <i>Halophila</i> as a result of a deeper root structure and being able to shade it. See macroalgae for elemental ratio and bottom cover.                                                                                                       |
| Halophila<br>(SGH)     | $SGH \text{ [g N m}^{-2}\text{]}$      | Concentration of nitrogen biomass per $\text{m}^2$ of a seagrass form parameterised to be similar to <i>Halophila ovalis</i> . This form captures light after it has passed through the <i>Zostera</i> seagrass form. The <i>Halophila ovalis</i> form is better adapted to low light conditions than <i>Zostera</i> , having a faster growth rate and lower minimum light requirement. See macroalgae for elemental ratio and bottom cover.                                                                                                                 |
| Deep seagrass<br>(SGD) | $SGD \text{ [g N m}^{-2}\text{]}$      | Concentration of nitrogen biomass per $\text{m}^2$ of a seagrass form parameterised to be similar to <i>Halophila decipiens</i> . This form captures light after it has passed through the <i>Zostera</i> and <i>Halophila ovalis</i> seagrass form.                                                                                                                                                                                                                                                                                                         |
| *root N                | $*ROOT\_N \text{ [g N m}^{-2}\text{]}$ | Concentration of nitrogen biomass per $\text{m}^2$ in the roots of seagrass type * (SG, SGH or SGD). While this biomass in reality exists in multiple depths in the sediments, and in the model accesses multiple layers for nutrient uptake, it is quantified in the epibenthic compartment.                                                                                                                                                                                                                                                                |

**Table 7.** Long name (and variable name) in model output files, units, symbol used in this document, and description of macroalgae and seagrass state variables in the model. The order in the above table corresponds to their vertical position, and therefore the order in which they access light. Benthic microalgae, being suspended in porewaters, is consider as a particulate in Table 5.

| Name                                  | Symbol                             | Description                                                                                                                                                                                                                                                                                                                                                                                                                                                                                                                                                                                                                                                                                                                                                                                                  |
|---------------------------------------|------------------------------------|--------------------------------------------------------------------------------------------------------------------------------------------------------------------------------------------------------------------------------------------------------------------------------------------------------------------------------------------------------------------------------------------------------------------------------------------------------------------------------------------------------------------------------------------------------------------------------------------------------------------------------------------------------------------------------------------------------------------------------------------------------------------------------------------------------------|
| Coral host N (CH_N)                   | $CH$ [g N m <sup>-2</sup> ]        | Concentration of nitrogen biomass per m <sup>2</sup> of coral host tissue in the entire grid cell. Unlike other epibenthic variables, corals area is assumed to exist in communities that are potentially smaller than the grid size. The fraction of the grid cell covered by corals is given by $A_{CH}$ . Thus the biomass in the occupied region is given by $CH/A_{CH}$ . The percent coverage of the coral of the bottom for the whole cell is given by $A_{CH} (1 - \exp(-\Omega_{CH} CH/A_{CH}))$ . With only one type of coral resolved, $CH$ represents the biomass of all symbiotic corals. Since the model contains no other benthic filter-feeders, $CH$ best represent the sum of the biomass of all symbiotic filter-feeding organisms such as corals, sponges, clams etc. C:N:P is 106:16:1. |
| Coral symbiont N (CS_N)               | $CS$ [mg N m <sup>-2</sup> ]       | Concentration of nitrogen biomass per m <sup>2</sup> of coral symbiont cells, or zooxanthellae. To determine the density of cells, use $n = CS/m_N$ . The percentage of the bottom covered is given by $\frac{\pi}{2\sqrt{3}} n \pi r_{zoo}^2$ where $\pi r^2$ is the projected area of the cell, $n$ is the number of cells, and $\pi/(2\sqrt{3}) \sim 0.9069$ accounts for the maximum packaging of spheres. C:N:P is 106:16:1.                                                                                                                                                                                                                                                                                                                                                                            |
| Coral symbiont chl (CS_Ch)            | $nc_i V$ [mg chl m <sup>-2</sup> ] | Concentration of chlorophyll biomass per m <sup>2</sup> of coral symbiont cells.                                                                                                                                                                                                                                                                                                                                                                                                                                                                                                                                                                                                                                                                                                                             |
| Coral symbiont diadinoxanthin (CS_Xp) | $nx_p V$ [mg pig m <sup>-2</sup> ] | Concentration of the photosynthetic xanthophyll cycle pigment per m <sup>2</sup> of coral symbiont cells.                                                                                                                                                                                                                                                                                                                                                                                                                                                                                                                                                                                                                                                                                                    |
| Coral symbiont diatoxanthin (CS_Xh)   | $nx_h V$ [mg pig m <sup>-2</sup> ] | Concentration of heat dissipating xanthophyll cycle pigment biomass per m <sup>2</sup> of coral symbiont cells.                                                                                                                                                                                                                                                                                                                                                                                                                                                                                                                                                                                                                                                                                              |

**Table 8.** Long name (and variable name) in model output files, units, symbol used in this document, and description of coral state variables in the model.

| Name                                     | Symbol                            | Description                                                                                                                                 |
|------------------------------------------|-----------------------------------|---------------------------------------------------------------------------------------------------------------------------------------------|
| Symbiont oxidised RC<br>(CS_Qox)         | $Q_{ox}$ [mg N m <sup>-2</sup> ]  | Concentration of symbiont reaction centres in an oxidised state per m <sup>2</sup> , residing in the symbiont, of in the entire grid cell.  |
| Symbiont reduced RC<br>(CS_Qred)         | $Q_{red}$ [mg N m <sup>-2</sup> ] | Concentration of symbiont reaction centres in a reduced state per m <sup>2</sup> , residing in the symbiont, of in the entire grid cell.    |
| Symbiont inhibited RC<br>(CS_Qin)        | $Q_{in}$ [mg N m <sup>-2</sup> ]  | Concentration of symbiont reaction centres in an inhibited state per m <sup>2</sup> , residing in the symbiont, of in the entire grid cell. |
| Symbiont reactive oxygen-<br>gen (CS_RO) | $[ROS]$ [mg N m <sup>-2</sup> ]   | Concentration of reactive oxygen per m <sup>2</sup> , residing in the symbiont, of in the entire grid cell.                                 |

**Table 9.** Long name (and variable name) in model output files, units, symbol used in this document, and description of coral reaction state variables in the model.

4 Parameter values used in eReefs biogeochemical model (B3p0).

The below five tables of parameters are specified for each run, and can be automatically generated by the EMS software after a simulation from the parameter file. At model initialisation the model produces a file `ecology_setup.txt` that contains a list of all the parameter values used, both those specified in the parameter file, and those using model defaults.

| Description                                     | Name in code | Symbol               | Value        | Units                         |
|-------------------------------------------------|--------------|----------------------|--------------|-------------------------------|
| Reference temperature                           | Tref         | $T_{ref}$            | 2.000000e+01 | Deg C                         |
| Temperature coefficient for rate parameters     | Q10          | $Q_{10}$             | 2.000000e+00 | none                          |
| Nominal rate of TKE dissipation in water column | TKEeps       | $\epsilon$           | 1.000000e-06 | $\text{m}^2 \text{s}^{-3}$    |
| Atmospheric CO2                                 | xco2_in_air  | $p\text{CO}_2$       | 3.964800e+02 | ppmv                          |
| Concentration of dissolved N2                   | N2           | $[\text{N}_2]_{gas}$ | 2.000000e+03 | $\text{mg N m}^{-3}$          |
| DOC-specific absorption of CDOM 443 nm          | acdom443star | $k_{CDOM,443}$       | 1.300000e-04 | $\text{m}^2 \text{mg C}^{-1}$ |

Table 10. Environmental parameters in eReefs biogeochemical model (B3p0).

| Description                                             | Name in code  | Symbol                    | Value        | Units                           |
|---------------------------------------------------------|---------------|---------------------------|--------------|---------------------------------|
| Chl-specific scattering coef. for microalgae            | bphy          | $b_{phy}$                 | 2.000000e-01 | $m^{-1}(mg\ Chla\ m^{-3})^{-1}$ |
| Nominal N:Chl a ratio in phytoplankton by weight        | NtoCHL        | $R_{N:Chl}$               | 7.000000e+00 | $g\ N(g\ Chla)^{-1}$            |
| Maximum growth rate of PL at Tref                       | PLumax        | $\mu_{PL}^{max}$          | 1.400000e+00 | $d^{-1}$                        |
| Radius of the large phytoplankton cells                 | PLrad         | $r_{PL}$                  | 4.000000e-06 | m                               |
| Natural (linear) mortality rate, large phytoplankton    | PhyL_mL       | $m_{L,PL}$                | 1.000000e-01 | $d^{-1}$                        |
| Natural (linear) mortality rate in sed., large phyto.   | PhyL_mL_sed   | $m_{L,PL,sed}$            | 1.000000e+01 | $d^{-1}$                        |
| Maximum growth rate of PS at Tref                       | PSumax        | $\mu_{PL}^{max}$          | 1.600000e+00 | $d^{-1}$                        |
| Radius of the small phytoplankton cells                 | PSrad         | $r_{PS}$                  | 1.000000e-06 | m                               |
| Natural (linear) mortality rate, small phyto.           | PhyS_mL       | $m_{L,PS}$                | 1.000000e-01 | $d^{-1}$                        |
| Natural (linear) mortality rate in sed., small phyto.   | PhyS_mL_sed   | $m_{L,PS,sed}$            | 1.000000e+00 | $d^{-1}$                        |
| Maximum growth rate of MB at Tref                       | MBumax        | $\mu_{MPB}^{max}$         | 8.390000e-01 | $d^{-1}$                        |
| Radius of the MPB cells                                 | MBrad         | $r_{MPB}$                 | 1.000000e-05 | m                               |
| Natural (quadratic) mortality rate, MPB (in sed)        | MPB_mQ        | $m_{Q,MPB}$               | 1.000000e-04 | $d^{-1}(mg\ N\ m^{-3})^{-1}$    |
| Ratio of xanthophyll to chl a of PS                     | PSxan2chl     | $\Theta_{xan2chl,PS}$     | 5.100000e-01 | $mg\ mg^{-1}$                   |
| Ratio of xanthophyll to chl a of PL                     | PLxan2chl     | $\Theta_{xan2chl,PL}$     | 8.100000e-01 | $mg\ mg^{-1}$                   |
| Ratio of xanthophyll to chl a of MPB                    | MBxan2chl     | $\Theta_{xan2chl,MPB}$    | 8.100000e-01 | $mg\ mg^{-1}$                   |
| Maximum growth rate of Trichodesmium at Tref            | Tricho_umax   | $\mu_{MPB}^{max}$         | 2.000000e-01 | $d^{-1}$                        |
| Radius of Trichodesmium colonies                        | Tricho_rad    | $r_{MPB}$                 | 5.000000e-06 | m                               |
| Sherwood number for the Tricho dimensionless            | Tricho_Sh     | $Sh_{Tricho}$             | 1.000000e+00 | none                            |
| Linear mortality for Tricho in sediment                 | Tricho_mL     | $m_{L,Tricho}$            | 1.000000e-01 | $d^{-1}$                        |
| Quadratic mortality for Tricho due to phages in wc      | Tricho_mQ     | $m_{Q,Tricho}$            | 1.000000e-01 | $d^{-1}(mg\ N\ m^{-3})^{-1}$    |
| Critical Tricho above which quadratic mortality applies | Tricho_crit   |                           | 2.000000e-04 | $mg\ N\ m^{-3}$                 |
| Minimum density of Trichodesmium                        | p_min         | $\rho_{min,Tricho}$       | 9.000000e+02 | $kg\ m^{-3}$                    |
| Maximum density of Trichodesmium                        | p_max         | $\rho_{max,Tricho}$       | 1.050000e+03 | $kg\ m^{-3}$                    |
| DIN conc below which Tricho N fixes                     | DINcrit       | $DIN_{crit}$              | 1.000000e+01 | $mg\ N\ m^{-3}$                 |
| Ratio of xanthophyll to chl a of Trichodesmium          | Trichoxan2chl | $\Theta_{xan2chl,Tricho}$ | 5.000000e-01 | $mg\ mg^{-1}$                   |
| Minimum carbon to chlorophyll a ratio                   | C2Chlmin      | $\theta_{min}$            | 2.000000e+01 | wt/wt                           |

**Table 11.** Phytoplankton parameters in eReefs biogeochemical model (B3p0).

| Description                                                  | Name in code | Symbol           | Value        | Units                                                 |
|--------------------------------------------------------------|--------------|------------------|--------------|-------------------------------------------------------|
| Maximum growth rate of ZS at Tref                            | ZSumax       | $\mu_{max}^{ZS}$ | 4.000000e+00 | d <sup>-1</sup>                                       |
| Radius of the small zooplankton cells                        | ZStrad       | $r_{ZS}$         | 5.000000e-06 | m                                                     |
| Swimming velocity for small zooplankton                      | ZSswim       | $U_{ZS}$         | 2.000000e-04 | m s <sup>-1</sup>                                     |
| Grazing technique of small zooplankton                       | ZSmeth       |                  | rect         | none                                                  |
| Maximum growth rate of ZL at Tref                            | ZLumax       | $\mu_{max}^{ZL}$ | 1.330000e+00 | d <sup>-1</sup>                                       |
| Radius of the large zooplankton cells                        | ZLrad        | $r_{ZL}$         | 3.200000e-04 | m                                                     |
| Swimming velocity for large zooplankton                      | ZLswim       | $U_{ZL}$         | 3.000000e-03 | m s <sup>-1</sup>                                     |
| Grazing technique of large zooplankton                       | ZLmeth       |                  | rect         | none                                                  |
| Growth efficiency, large zooplankton                         | ZL_E         | $E_{ZL}$         | 4.260000e-01 | none                                                  |
| Growth efficiency, small zooplankton                         | ZS_E         | $E_{ZS}$         | 4.620000e-01 | none                                                  |
| Natural (quadratic) mortality rate, large zooplankton        | ZL_mQ        | $m_{Q,ZL}$       | 1.200000e-02 | d <sup>-1</sup> (mg N m <sup>-3</sup> ) <sup>-1</sup> |
| Natural (quadratic) mortality rate, small zooplankton        | ZS_mQ        | $m_{Q,ZS}$       | 2.000000e-02 | d <sup>-1</sup> (mg N m <sup>-3</sup> ) <sup>-1</sup> |
| Fraction of growth inefficiency lost to detritus, large zoo. | ZL_FDG       | $\gamma_{ZL}$    | 5.000000e-01 | none                                                  |
| Fraction of mortality lost to detritus, large zoo.           | ZL_FDM       | N/A              | 1.000000e+00 | none                                                  |
| Fraction of growth inefficiency lost to detritus, small zoo. | ZS_FDG       | $\gamma_{ZS}$    | 5.000000e-01 | none                                                  |
| Fraction of mortality lost to detritus, small zooplankton    | ZS_FDM       | N/A              | 1.000000e+00 | none                                                  |

**Table 12.** Zooplankton parameters in eReefs biogeochemical model (B3p0).



| Description                                                  | Name in code | Symbol            | Value        | Units                     |
|--------------------------------------------------------------|--------------|-------------------|--------------|---------------------------|
| Fraction of labile detritus converted to refractory detritus | F_LD_RD      | $\zeta_{Red}$     | 1.900000e-01 | none                      |
| Fraction of labile detritus converted to DOM                 | F_LD_DOM     | $\vartheta_{Red}$ | 1.000000e-01 | none                      |
| fraction of refractory detritus that breaks down to DOM      | F_RD_DOM     | $\vartheta_{Ref}$ | 5.000000e-02 | none                      |
| Breakdown rate of labile detritus at 106:16:1                | r_DetPL      | $r_{Red}$         | 4.000000e-02 | d <sup>-1</sup>           |
| Breakdown rate of labile detritus at 550:30:1                | r_DetBL      | $r_{Atk}$         | 1.000000e-03 | d <sup>-1</sup>           |
| Breakdown rate of refractory detritus                        | r_RD         | $r_R$             | 1.000000e-03 | d <sup>-1</sup>           |
| Breakdown rate of dissolved organic matter                   | r_DOM        | $r_O$             | 1.000000e-04 | d <sup>-1</sup>           |
| Respiration as a fraction of umax                            | Plank_resp   | $\phi$            | 2.500000e-02 | none                      |
| Oxygen half-saturation for aerobic respiration               | KO_aer       | $K_{OA}$          | 2.560000e+02 | mg O m <sup>-3</sup>      |
| Maximum nitrification rate in water column                   | r_nit_wc     | $\tau_{nit,wc}$   | 1.000000e-01 | d <sup>-1</sup>           |
| Maximum nitrification rate in water sediment                 | r_nit_sed    | $\tau_{nit,sed}$  | 2.000000e+01 | d <sup>-1</sup>           |
| Oxygen half-saturation for nitrification                     | KO_nit       | $K_{O_2,nit}$     | 5.000000e+02 | mg O m <sup>-3</sup>      |
| Rate at which P reaches adsorbed/desorbed equilibrium        | Pads_r       | $\tau_{Pabs}$     | 4.000000e-02 | d <sup>-1</sup>           |
| Freundlich Isothermic Const P adsorption to TSS in wc        | Pads_Kwc     | $k_{Pads,wc}$     | 3.000000e+01 | mg P kg TSS <sup>-1</sup> |
| Freundlich Isothermic Const P adsorption to TSS in sed       | Pads_Ksed    | $k_{Pads,sed}$    | 7.400000e+01 | mg P kg TSS <sup>-1</sup> |
| Oxygen half-saturation for P adsorption                      | Pads_KO      | $K_{O_2,abs}$     | 2.000000e+03 | mg O m <sup>-3</sup>      |
| Exponent for Freundlich Isotherm                             | Pads_exp     | $N/A$             | 1.000000e+00 | none                      |
| Maximum denitrification rate                                 | r_den        | $\tau_{denit}$    | 8.000000e-01 | d <sup>-1</sup>           |
| Oxygen half-saturation constant for denitrification          | KO_den       | $K_{O_2,denit}$   | 1.000000e+04 | mg O m <sup>-3</sup>      |
| Rate of conversion of PIP to immobilised PIP                 | r_immob_PIP  | $\tau_{Pimm}$     | 1.200000e-03 | d <sup>-1</sup>           |

**Table 13.** Detritus parameters in eReefs biogeochemical model (B3p0).

| Description                                    | Name in code      | Symbol             | Value        | Units                                    |
|------------------------------------------------|-------------------|--------------------|--------------|------------------------------------------|
| Sediment-water diffusion coefficient           | EpiDiffCoeff      | $D$                | 3.000000e-07 | $\text{m}^2 \text{s}^{-1}$               |
| Thickness of diffusive layer                   | EpiDiffDz         | $h$                | 6.500000e-03 | m                                        |
| Maximum growth rate of MA at Tref              | MAumax            | $\mu_{MA}^{max}$   | 1.000000e+00 | $\text{d}^{-1}$                          |
| Natural (linear) mortality rate, macroalgae    | MA_mL             | $\zeta_{MA}$       | 1.000000e-02 | $\text{d}^{-1}$                          |
| Nitrogen-specific leaf area of macroalgae      | MAleafden         | $\Omega_{MA}$      | 1.000000e+00 | $\text{m}^2 \text{g N}^{-1}$             |
| Respiration as a fraction of umax              | Benth_resp        | $\phi$             | 2.500000e-02 | none                                     |
| net dissolution rate of sediment without coral | dissCaCO3_sed     | $d_{sand}$         | 1.000000e-03 | $\text{mmol C m}^{-2} \text{s}^{-1}$     |
| Grid scale to reef scale ratio                 | CHarea            | $A_{CH}$           | 1.000000e-01 | $\text{m}^2 \text{m}^{-2}$               |
| Nitrogen-specific host area of coral polyp     | CHpolypden        | $\Omega_{CH}$      | 2.000000e+00 | $\text{m}^2 \text{g N}^{-1}$             |
| Max. growth rate of Coral at Tref              | CHumax            | $\mu_{CH}^{max}$   | 5.000000e-02 | $\text{d}^{-1}$                          |
| Max. growth rate of zooxanthellae at Tref      | CSumax            | $\mu_{CS}^{max}$   | 4.000000e-01 | $\text{d}^{-1}$                          |
| Radius of the zooxanthellae                    | CSrad             | $r_{CS}$           | 5.000000e-06 | m                                        |
| Quadratic mortality rate of coral polyp        | CHmort            | $\zeta_{CH}$       | 1.000000e-02 | $(\text{g N m}^{-2})^{-1} \text{d}^{-1}$ |
| Linear mortality rate of zooxanthellae         | CSmort            | $\zeta_{CS}$       | 4.000000e-02 | $\text{d}^{-1}$                          |
| Fraction of coral host death translocated.     | CHremin           | $f_{remin}$        | 5.000000e-01 | -                                        |
| Rate coefficient for particle uptake by corals | Splank            | $S_{part}$         | 3.000000e+00 | $\text{m d}^{-1}$                        |
| Maximum daytime coral calcification            | k_day_coral       | $k_{day}$          | 1.320000e-02 | $\text{mmol C m}^{-2} \text{s}^{-1}$     |
| Maximum nighttime coral calcification          | k_night_coral     | $k_{night}$        | 6.900000e-03 | $\text{mmol C m}^{-2} \text{s}^{-1}$     |
| Carbonate sediment dissolution rate on shelf   | dissCaCO3_shelf   | $d_{shelf}$        | 1.000000e-04 | $\text{mmol C m}^{-2} \text{s}^{-1}$     |
| Age tracer growth rate per day                 | ageing_decay      | $n/a$              | 1.000000e+00 | $\text{d d}^{-1}$                        |
| Age tracer decay rate per day outside source   | anti_ageing_decay | $\Phi$             | 1.000000e-01 | $\text{d}^{-1}$                          |
| Bleaching ROS threshold                        | ROSthreshold      | $\phi_{ROS}$       | 5.000000e-04 | $\text{mg O cell}^{-1}$                  |
| Xanthophyll switching rate coefficient         | Xanth_tau         | $\tau_{xan}$       | 8.333333e-04 | $\text{s}^{-1}$                          |
| Ratio of RCII to Chlorophyll a                 | chl2rcii          | $A_{RCII}$         | 2.238413e-06 | $\text{mol RCII g Chl}^{-1}$             |
| Stoichiometric ratio of RCII units to photons  | photon2rcii       | $m_{RCII}$         | 1.000000e-07 | $\text{mol RCII mol photon}^{-1}$        |
| Maximum zooxanthellae expulsion rate           | ROSmaxrate        | $\gamma$           | 1.000000e+00 | $\text{d}^{-1}$                          |
| Scaling of DetP to DOP, relative to N          | r_RD_NtoP         | $r_{RD_{NtoP}}$    | 2.000000e+00 | -                                        |
| Scaling of DOM to DIP, relative to N           | r_DOM_NtoP        | $r_{DOM_{NtoP}}$   | 1.500000e+00 | -                                        |
| Radius of Trichodesmium colonies               | Tricho_colrad     | $r_{Trichocolony}$ | 5.000000e-06 | m                                        |

**Table 14.** Benthic parameters in eReefs biogeochemical model (B3p0), excluding seagrass

| Description                                          | Name in code     | Symbol                   | Value         | Units                            |
|------------------------------------------------------|------------------|--------------------------|---------------|----------------------------------|
| Maximum growth rate of SG at Tref                    | SGumax           | $\mu_{SG}^{max}$         | 4.000000e-01  | d <sup>-1</sup>                  |
| Half-saturation of SG N uptake in SED                | SG_KN            | $K_{SG,N}$               | 4.200000e+02  | mg N m <sup>-3</sup>             |
| Half-saturation of SG P uptake in SED                | SG_KP            | $K_{SG,P}$               | 9.600000e+01  | mg P m <sup>-3</sup>             |
| Natural (linear) mortality rate aboveground seagrass | SG_mL            | $\zeta_{SGA}$            | 3.000000e-02  | d <sup>-1</sup>                  |
| Natural (linear) mortality rate belowground seagrass | SGROOT_mL        | $\zeta_{SGB}$            | 4.000000e-03  | d <sup>-1</sup>                  |
| Fraction (target) of SG biomass below-ground         | SGfrac           | $f_{below,SG}$           | 7.500000e-01  | -                                |
| Time scale for seagrass translocation                | SGtransrate      | $\tau_{tran,SG}$         | 3.330000e-02  | d <sup>-1</sup>                  |
| Nitrogen-specific leaf area of seagrass              | SGleafden        | $\Omega_{SG}$            | 1.500000e+00  | m <sup>2</sup> g N <sup>-1</sup> |
| Seagrass seed biomass as fraction of 63 % cover      | SGseedfrac       | $f_{seed,SG}$            | 1.000000e-02  | -                                |
| Sine of nadir Zostera canopy bending angle           | SGorient         | $\sin \beta_{blade,SG}$  | 5.000000e-01  | -                                |
| Compensation irradiance for Zostera                  | SGmlr            | $E_{comp,SG}$            | 4.500000e+00  | mol m <sup>-2</sup>              |
| Maximum depth for Zostera roots                      | SGrootdepth      | $z_{root,SG}$            | -1.500000e-01 | m                                |
| Critical shear stress for SG loss                    | SG_tau_critical  | $\tau_{SG,shear}$        | 1.000000e+00  | N m <sup>-2</sup>                |
| Time-scale for critical shear stress for SG loss     | SG_tau_time      | $\tau_{SG,time}$         | 4.320000e+04  | s                                |
| Maximum growth rate of SGH at Tref                   | SGHumax          | $\mu_{SGH}^{max}$        | 4.000000e-01  | d <sup>-1</sup>                  |
| Half-saturation of SGH N uptake in SED               | SGH_KN           | $K_{SGH,N}$              | 4.200000e+02  | mg N m <sup>-3</sup>             |
| Half-saturation of SGH P uptake in SED               | SGH_KP           | $K_{SGH,P}$              | 9.600000e+01  | mg P m <sup>-3</sup>             |
| Nitrogen-specific leaf area of SGH                   | SGHleafden       | $\Omega_{SGH}$           | 1.900000e+00  | m <sup>2</sup> g N <sup>-1</sup> |
| Natural (linear) mortality rate, aboveground SGH     | SGH_mL           | $\zeta_{SGHA}$           | 6.000000e-02  | d <sup>-1</sup>                  |
| Natural (linear) mortality rate, belowground SGH     | SGHROOT_mL       | $\zeta_{SGHB}$           | 4.000000e-03  | d <sup>-1</sup>                  |
| Fraction (target) of SGH biomass below -ground       | SGHfrac          | $f_{below,SGH}$          | 5.000000e-01  | -                                |
| Time scale for Halophila translocation               | SGHtransrate     | $\tau_{tran,SGH}$        | 3.330000e-02  | d <sup>-1</sup>                  |
| Halophila seed biomass as fraction of 63 % cover     | SGHseedfrac      | $f_{seed,SGH}$           | 1.000000e-02  | -                                |
| Sine of nadir Halophila canopy bending angle         | SGHorient        | $\sin \beta_{blade,SGH}$ | 1.000000e+00  | -                                |
| Compensation irradiance for Halophila                | SGHmlr           | $E_{comp,SGH}$           | 2.000000e+00  | mol m <sup>-2</sup>              |
| Maximum depth for Halophila roots                    | SGHrootdepth     | $z_{root,SGH}$           | -8.000000e-02 | m                                |
| Critical shear stress for SGH loss                   | SGH_tau_critical | $\tau_{SGH,shear}$       | 1.000000e+00  | N m <sup>-2</sup>                |
| Time-scale for critical shear stress for SGH loss    | SGH_tau_time     | $\tau_{SGH,time}$        | 4.320000e+04  | s                                |

**Table 15.** Seagrass parameters in eReefs biogeochemical model (B3p0).

| Description                                      | Name in code     | Symbol                   | Value         | Units                            |
|--------------------------------------------------|------------------|--------------------------|---------------|----------------------------------|
| Maximum growth rate of SGD at Tref               | SGDumax          | $\mu_{SGD}^{max}$        | 4.000000e-01  | d <sup>-1</sup>                  |
| Half-saturation of SGD N uptake in SED           | SGD_KN           | $K_{SGD,N}$              | 4.200000e+02  | mg N m <sup>-3</sup>             |
| Half-saturation of SGD P uptake in SED           | SGD_KP           | $K_{SGD,P}$              | 9.600000e+01  | mg P m <sup>-3</sup>             |
| Nitrogen-specific leaf area of SGD               | SGDleafden       | $\Omega_{SGD}$           | 1.900000e+00  | m <sup>2</sup> g N <sup>-1</sup> |
| Natural (linear) mortality rate, aboveground SGD | SGD_mL           | $\zeta_{SGD_A}$          | 6.000000e-02  | d <sup>-1</sup>                  |
| Natural (linear) mortality rate, belowground SGD | SGDROOT_mL       | $\zeta_{SGD_B}$          | 4.000000e-03  | d <sup>-1</sup>                  |
| Fraction (target) of SGD biomass below-ground    | SGDfrac          | $f_{below,SGD}$          | 2.500000e-01  | -                                |
| Time scale for deep SG translocation             | SGDtransrate     | $\tau_{tran,SGD}$        | 3.330000e-02  | d <sup>-1</sup>                  |
| Deep SG seed biomass as fraction of 63 % cover   | SGDseedfrac      | $f_{seed,SGD}$           | 1.000000e-02  | -                                |
| Sine of nadir deep SG canopy bending angle       | SGDorient        | $\sin \beta_{blade,SGD}$ | 1.000000e+00  | -                                |
| Compensation irradiance for deep SG              | SGDmlr           | $E_{comp,SGD}$           | 1.500000e+00  | mol m <sup>-2</sup>              |
| Maximum depth for deep SG roots                  | SGDrootdepth     | $z_{root,SGD}$           | -5.000000e-02 | m                                |
| Critical shear stress for deep SG loss           | SGD_tau_critical | $\tau_{SGD,shear}$       | 1.000000e+00  | N m <sup>-2</sup>                |
| Time-scale for shear stress for deep SG loss     | SGD_tau_time     | $\tau_{SGD,time}$        | 4.320000e+04  | s                                |

**Table 16.** Deep seagrass parameters in eReefs biogeochemical model (B3p0).
